# Supplementary material for: Comparative transcriptome analysis identified candidate genes associated with kernel row number in maize
Source: PeerJ. 2025 Mar 31;13:e19143. doi: 10.7717/peerj.19143 (PMC11967441; doi:10.7717/peerj.19143)
Supplement: Supplemental Information 5 [file peerj-13-19143-s005.xlsx]

## Sheet: Sheet1
Supplemental Dataset 1.The raw measurements of the kernel row number of two lines
	kernel row number of Dan598	kernel row number of PHG35
1	18	12
2	18	12
3	22	12
4	20	14
5	20	12
6	20	12
7	20	12
8	20	12
9	20	12
10	20	10
11	20	10
12	20	10
13	20	14
14	20	12
15	20	12
16	20	12
17	20	12
18	20	14
19	20	12
20	22	12
21	18	12
22	20	12
23	20	14
24	20	14
25	20	10
26	22	12
27	22	12
28	22	12
29	22	12
30	22	12
31	24
32	22
33	22
