# Supplementary material for: Comparative transcriptome analysis identified candidate genes associated with kernel row number in maize
Source: PeerJ. 2025 Mar 31;13:e19143. doi: 10.7717/peerj.19143 (PMC11967441; doi:10.7717/peerj.19143)
Supplement: Supplemental Information 6 [file peerj-13-19143-s006.xlsx]

## Sheet: D_V6 versus P_V6
Supplemental Dataset 2. List of line-specific differentially expressed genes (D_V6 versus P_V6)
	gene_ID	baseMean	log2FoldChange	lfcSE	stat	pvalue	padj
1	Zm00001d051591	10255.4	-9.78247	0.224638	-43.5477	0	0
2	Zm00001d033657	7159.34	-9.20526	0.226795	-40.5884	0	0
3	Zm00001d029307	6728.06	-8.71221	0.231297	-37.6667	0	0
4	Zm00001d048839	3732.01	-8.03418	0.222929	-36.0391	2.04307e-284	7.72451e-281
5	Zm00001d005779	7466.11	-7.73495	0.183793	-42.085	0	0
6	Zm00001d015028	1550.57	-7.1458	0.27593	-25.8972	7.16216e-148	4.77864e-145
7	Zm00001d010220	2475.35	-6.88369	0.233686	-29.4571	1.02235e-190	1.22063e-187
8	Zm00001d042278	1164.05	-6.45881	0.243468	-26.5284	4.56364e-155	3.69736e-152
9	Zm00001d042692	10241.4	-6.396	0.195682	-32.6857	2.49424e-234	5.1438e-231
10	Zm00001d053082	1384.28	-6.32	0.2131	-29.6574	2.71937e-193	3.62876e-190
11	Zm00001d038250	1803.89	-6.29582	0.486308	-12.9462	2.47019e-38	1.69294e-36
12	Zm00001d021382	1468.12	-6.28431	0.22497	-27.9341	1.02946e-171	1.11206e-168
13	Zm00001d052992	705.649	-6.27292	0.293026	-21.4074	1.14008e-101	3.49497e-99
14	Zm00001d011604	6557.65	-6.25926	0.212896	-29.4006	5.39507e-190	6.11936e-187
15	Zm00001d049480	1932.38	-6.24353	0.257895	-24.2095	1.76493e-129	9.09942e-127
16	Zm00001d010577	879.625	-6.1269	0.259287	-23.6298	1.90441e-123	8.81663e-121
17	Zm00001d015097	2229.73	-6.02571	0.484653	-12.433	1.72925e-35	1.06598e-33
18	Zm00001d032540	521.81	-5.93777	0.29417	-20.1848	1.33055e-90	3.24554e-88
19	Zm00001d002305	826.932	-5.89044	0.289175	-20.3698	3.10012e-92	7.99161e-90
20	Zm00001d034434	656.697	-5.70351	0.32958	-17.3054	4.28379e-67	6.56606e-65
21	Zm00001d028733	839.953	-5.52479	0.246684	-22.3963	4.28131e-111	1.49418e-108
22	Zm00001d019111	528.961	-5.45268	0.257875	-21.1446	3.09359e-99	9.11404e-97
23	Zm00001d031188	436.331	-5.4456	0.325383	-16.736	7.16809e-63	9.73702e-61
24	Zm00001d051060	322.02	-5.41968	0.314195	-17.2494	1.13012e-66	1.6978e-64
25	Zm00001d039133	1942.2	-5.35629	0.209886	-25.5201	1.18105e-143	7.05053e-141
26	Zm00001d029722	2603.16	-5.34222	0.165785	-32.2237	8.2161e-228	1.55318e-224
27	Zm00001d052902	954.079	-5.32678	0.275688	-19.3218	3.52241e-83	7.53829e-81
28	Zm00001d011446	837.942	-5.30999	0.226927	-23.3995	4.31968e-121	1.8489e-118
29	Zm00001d014114	1807.94	-5.25781	0.254375	-20.6695	6.51597e-95	1.7597e-92
30	Zm00001d025354	11143.2	-5.24365	0.150349	-34.8766	1.68517e-266	5.46115e-263
31	Zm00001d046975	831.902	-5.23285	0.223353	-23.4286	2.18321e-121	9.52424e-119
32	Zm00001d018257	3154.96	-5.2302	0.233701	-22.3798	6.18617e-111	2.12626e-108
33	Zm00001d047841	949.691	-5.21437	0.560694	-9.29984	1.40663e-20	4.1986e-19
34	Zm00001d034421	8768.41	-5.20363	0.166974	-31.1643	3.24733e-213	5.66659e-210
35	Zm00001d013055	392.115	-5.1246	0.288635	-17.7546	1.58753e-70	2.70775e-68
36	Zm00001d022468	1056.71	-5.09314	0.216169	-23.5609	9.70842e-123	4.40471e-120
37	Zm00001d051132	255.537	-5.07697	0.329742	-15.3968	1.7197e-53	1.96037e-51
38	Zm00001d048649	624.741	-5.02475	0.269162	-18.6681	8.99397e-78	1.80556e-75
39	Zm00001d031991	354.768	-4.94897	0.294985	-16.777	3.59451e-63	4.91213e-61
40	Zm00001d007936	470.913	-4.92975	0.304713	-16.1783	7.17059e-59	8.88879e-57
41	Zm00001d000496	418.599	-4.91818	0.361529	-13.6038	3.80072e-42	3.05742e-40
42	Zm00001d025509	3040.34	-4.87993	0.185488	-26.3085	1.53128e-152	1.12055e-149
43	Zm00001d048020	567.273	-4.87527	0.374	-13.0355	7.68705e-39	5.3491e-37
44	Zm00001d009351	622.656	-4.86459	0.244572	-19.8902	4.94622e-88	1.15675e-85
45	Zm00001d024903	2290.4	-4.84129	0.882555	-5.48554	4.12213e-08	3.79353e-07
46	Zm00001d010079	850.71	-4.82328	0.271279	-17.7797	1.01451e-70	1.7435e-68
47	Zm00001d006386	547.139	-4.81076	0.322683	-14.9086	2.89675e-50	3.02274e-48
48	Zm00001d015747	1961.71	-4.78908	0.177403	-26.9955	1.66846e-160	1.51396e-157
49	Zm00001d030920	271.187	-4.76423	0.330477	-14.4162	4.09176e-47	3.85152e-45
50	Zm00001d037731	1284.9	-4.68659	0.222186	-21.0931	9.20354e-99	2.6767e-96
51	Zm00001d039685	653.177	-4.68627	0.347115	-13.5007	1.54989e-41	1.22934e-39
52	Zm00001d034460	3353.85	-4.65047	0.175557	-26.4898	1.2717e-154	9.94774e-152
53	Zm00001d041973	1550.09	-4.64291	0.219189	-21.1823	1.39216e-99	4.15541e-97
54	Zm00001d026371	666.289	-4.62156	0.224867	-20.5524	7.3211e-94	1.95387e-91
55	Zm00001d049771	5387.59	-4.57726	0.183784	-24.9057	6.45774e-137	3.57302e-134
56	Zm00001d023473	374.534	-4.56784	0.293019	-15.5889	8.66425e-55	9.97708e-53
57	Zm00001d004243	178.581	-4.56443	0.509028	-8.96696	3.04805e-19	8.20226e-18
58	Zm00001d015046	333.779	-4.56043	0.278844	-16.3548	4.02244e-60	5.15532e-58
59	Zm00001d053634	453.285	-4.55503	0.271066	-16.8041	2.27664e-63	3.13004e-61
60	Zm00001d011666	1039.44	-4.54638	0.259	-17.5536	5.58206e-69	9.24299e-67
61	Zm00001d023553	161.695	-4.52036	0.377301	-11.9808	4.48124e-33	2.53509e-31
62	Zm00001d027011	2515.54	-4.50345	0.214944	-20.9517	1.8108e-97	5.13475e-95
63	Zm00001d011294	499.153	-4.50224	0.23467	-19.1854	4.90448e-82	1.0398e-79
64	Zm00001d028567	536.111	-4.49576	0.30463	-14.7581	2.72791e-49	2.72611e-47
65	Zm00001d025484	290.727	-4.48472	0.340716	-13.1626	1.43972e-39	1.04013e-37
66	Zm00001d043702	405.661	-4.47931	0.429331	-10.4332	1.74826e-25	6.98228e-24
67	Zm00001d024885	2106.07	-4.47356	0.244165	-18.3219	5.53907e-75	1.02995e-72
68	Zm00001d040496	263.345	-4.46654	0.323716	-13.7977	2.63083e-43	2.19413e-41
69	Zm00001d002899	263.53	-4.46636	0.402821	-11.0877	1.4395e-28	6.67793e-27
70	Zm00001d026062	928.335	-4.44068	0.259482	-17.1136	1.175e-65	1.73083e-63
71	Zm00001d011079	1088.93	-4.43151	0.200186	-22.137	1.39308e-108	4.45099e-106
72	Zm00001d034722	354.39	-4.43116	0.332994	-13.307	2.10643e-40	1.58227e-38
73	Zm00001d030162	180.588	-4.37341	0.386361	-11.3195	1.05077e-29	5.11517e-28
74	Zm00001d040534	1559.87	-4.29817	0.238623	-18.0124	1.55711e-72	2.73822e-70
75	Zm00001d000383	364.52	-4.29255	0.262357	-16.3615	3.60048e-60	4.64073e-58
76	Zm00001d006300	508.948	-4.27995	0.298633	-14.3318	1.38485e-46	1.28226e-44
77	Zm00001d011930	302.385	-4.23346	0.338136	-12.52	5.80367e-36	3.67755e-34
78	Zm00001d007789	225.544	-4.18087	0.342943	-12.1911	3.46528e-34	2.05785e-32
79	Zm00001d018893	212.858	-4.17	0.353334	-11.8018	3.81842e-32	2.07227e-30
80	Zm00001d029390	178.363	-4.11641	0.369883	-11.1289	9.07008e-29	4.23364e-27
81	Zm00001d008283	704.191	-4.10333	0.281401	-14.5818	3.66677e-48	3.55473e-46
82	Zm00001d019226	1344.51	-4.09619	0.179407	-22.8319	2.21235e-115	8.36451e-113
83	Zm00001d014204	553.844	-4.09472	0.245161	-16.7022	1.263e-62	1.69533e-60
84	Zm00001d033044	13888.2	-4.05136	0.160896	-25.18	6.63146e-140	3.76087e-137
85	Zm00001d002817	1060.74	-4.04826	0.194915	-20.7694	8.19041e-96	2.23855e-93
86	Zm00001d019243	2860.56	-4.03977	0.162476	-24.8637	1.83694e-136	9.92166e-134
87	Zm00001d008951	347.229	-4.03368	0.26843	-15.0269	4.89107e-51	5.28352e-49
88	Zm00001d032408	173.502	-4.01195	0.43902	-9.13843	6.33665e-20	1.7879e-18
89	Zm00001d024713	3084.99	-4.00964	0.196948	-20.3589	3.87095e-92	9.86658e-90
90	Zm00001d052500	488.765	-4.00933	0.31803	-12.6068	1.938e-36	1.24896e-34
91	Zm00001d022327	276.255	-3.96819	0.499002	-7.95227	1.8313e-15	3.64413e-14
92	Zm00001d039914	28995.3	-3.96092	0.178844	-22.1474	1.10485e-108	3.58049e-106
93	Zm00001d048135	977.821	-3.94093	0.286179	-13.7709	3.81535e-43	3.14732e-41
94	Zm00001d039824	446.382	-3.93866	0.26419	-14.9084	2.90481e-50	3.02274e-48
95	Zm00001d053675	8874.95	-3.93118	0.240884	-16.3198	7.13869e-60	9.047e-58
96	Zm00001d053092	7701.2	-3.92646	0.232681	-16.8749	6.88524e-64	9.58231e-62
97	Zm00001d048693	1199.67	-3.9247	0.238139	-16.4807	5.05029e-61	6.6223e-59
98	Zm00001d002113	423.061	-3.92143	0.2952	-13.284	2.86816e-40	2.13326e-38
99	Zm00001d023384	1030.96	-3.92107	0.307331	-12.7585	2.79618e-37	1.86562e-35
100	Zm00001d022032	845.902	-3.89539	0.593402	-6.56451	5.22058e-11	6.99934e-10
101	Zm00001d040460	235.45	-3.88608	0.44417	-8.74909	2.15082e-18	5.4394e-17
102	Zm00001d025346	483.211	-3.87685	0.389236	-9.96017	2.27672e-23	8.09522e-22
103	Zm00001d042460	510.485	-3.87672	0.247325	-15.6746	2.25689e-55	2.63905e-53
104	Zm00001d019312	23594.9	-3.87389	0.126259	-30.6822	9.845e-207	1.59524e-203
105	Zm00001d011915	319.204	-3.84595	0.291698	-13.1847	1.07498e-39	7.84111e-38
106	Zm00001d052851	747.238	-3.82146	0.226238	-16.8913	5.21351e-64	7.30052e-62
107	Zm00001d025389	403.832	-3.82082	0.237846	-16.0642	4.54458e-58	5.54268e-56
108	Zm00001d036341	163.359	-3.81723	0.38388	-9.9438	2.68396e-23	9.51339e-22
109	Zm00001d051018	178.925	-3.80295	0.353007	-10.773	4.61627e-27	1.99088e-25
110	Zm00001d004855	1232.98	-3.80005	0.188182	-20.1935	1.11712e-90	2.75455e-88
111	Zm00001d011413	194.821	-3.79343	0.34641	-10.9507	6.59525e-28	2.94514e-26
112	Zm00001d039102	652.151	-3.76018	0.254605	-14.7687	2.33305e-49	2.34183e-47
113	Zm00001d017178	284.268	-3.74231	0.288308	-12.9802	1.58381e-38	1.08875e-36
114	Zm00001d014089	309.767	-3.73698	0.406022	-9.20389	3.45236e-20	9.91351e-19
115	Zm00001d024070	105.164	-3.73168	0.460243	-8.10808	5.14256e-16	1.07223e-14
116	Zm00001d012555	275.906	-3.71986	0.348736	-10.6667	1.4571e-26	6.12117e-25
117	Zm00001d047607	388.203	-3.71148	0.273385	-13.576	5.5553e-42	4.45307e-40
118	Zm00001d014863	655.06	-3.70503	0.739534	-5.00995	5.44437e-07	4.15005e-06
119	Zm00001d013294	2304.71	-3.7029	0.161101	-22.9849	6.60153e-117	2.67421e-114
120	Zm00001d037507	4463.05	-3.7003	0.145165	-25.4904	2.51889e-143	1.46516e-140
121	Zm00001d018857	1200.8	-3.69112	0.212131	-17.4002	8.22295e-68	1.31364e-65
122	Zm00001d052394	334.04	-3.6769	0.38483	-9.55461	1.2405e-21	4.01436e-20
123	Zm00001d010613	129.475	-3.67653	0.4209	-8.73493	2.43808e-18	6.13849e-17
124	Zm00001d011075	1079.35	-3.67435	0.203515	-18.0545	7.27388e-73	1.28913e-70
125	Zm00001d010885	213.792	-3.67419	0.373246	-9.84388	7.28485e-23	2.53073e-21
126	Zm00001d042258	2807.81	-3.67167	0.158031	-23.2338	2.0741e-119	8.71315e-117
127	Zm00001d047548	953.305	-3.64554	0.712766	-5.11465	3.14329e-07	2.50229e-06
128	Zm00001d005822	174.377	-3.64501	0.474865	-7.67588	1.64287e-14	3.02749e-13
129	Zm00001d032036	341.404	-3.64142	0.264171	-13.7843	3.16794e-43	2.6228e-41
130	Zm00001d024071	137.787	-3.61937	0.43296	-8.35961	6.29267e-17	1.42464e-15
131	Zm00001d042861	2268.47	-3.59296	0.185189	-19.4016	7.47922e-84	1.64724e-81
132	Zm00001d010428	9516.62	-3.59157	0.190813	-18.8225	4.93925e-79	1.01861e-76
133	Zm00001d036701	112.324	-3.58873	0.413719	-8.67433	4.15989e-18	1.03359e-16
134	Zm00001d032398	243.573	-3.58325	0.336645	-10.644	1.85991e-26	7.77019e-25
135	Zm00001d025126	1095.44	-3.57518	0.19239	-18.583	4.41404e-77	8.70718e-75
136	Zm00001d037680	3702.89	-3.56546	0.156543	-22.7762	7.8868e-115	2.93298e-112
137	Zm00001d051709	626.93	-3.53478	0.247159	-14.3016	2.13684e-46	1.9546e-44
138	Zm00001d028557	10398.8	-3.53105	0.191886	-18.4018	1.27032e-75	2.44214e-73
139	Zm00001d009820	338.321	-3.52312	0.435025	-8.09867	5.5565e-16	1.1543e-14
140	Zm00001d023724	583.838	-3.51936	0.224875	-15.6503	3.30569e-55	3.826e-53
141	Zm00001d029087	1428.74	-3.51337	0.19117	-18.3783	1.96096e-75	3.73819e-73
142	Zm00001d022210	159.614	-3.51057	0.360318	-9.743	1.97635e-22	6.64201e-21
143	Zm00001d003162	297.968	-3.47741	0.369375	-9.4143	4.76265e-21	1.46795e-19
144	Zm00001d008841	465.249	-3.47466	0.719561	-4.82886	1.37315e-06	9.74654e-06
145	Zm00001d048476	123.036	-3.46559	0.407034	-8.51424	1.67686e-17	3.9666e-16
146	Zm00001d051546	241.37	-3.46553	0.313931	-11.0391	2.47407e-28	1.12699e-26
147	Zm00001d016301	266.658	-3.4645	0.315653	-10.9757	5.00406e-28	2.24342e-26
148	Zm00001d039542	11141	-3.43717	0.209259	-16.4254	1.25752e-60	1.63948e-58
149	Zm00001d032035	178.288	-3.42896	0.417797	-8.20722	2.2636e-16	4.83519e-15
150	Zm00001d033607	249.121	-3.4124	0.326226	-10.4602	1.31525e-25	5.2808e-24
151	Zm00001d008905	524.861	-3.40992	0.298096	-11.439	2.66956e-30	1.33684e-28
152	Zm00001d007319	1061.62	-3.40931	0.230212	-14.8094	1.27363e-49	1.29562e-47
153	Zm00001d049543	10400.2	-3.4079	0.216689	-15.7272	9.85376e-56	1.1582e-53
154	Zm00001d043512	212.072	-3.39162	0.438274	-7.73857	1.00539e-14	1.87713e-13
155	Zm00001d018788	1145.71	-3.38977	0.196993	-17.2075	2.33105e-66	3.4562e-64
156	Zm00001d021009	727.779	-3.38642	0.22158	-15.2831	9.91408e-53	1.11337e-50
157	Zm00001d012251	130.162	-3.37936	0.391501	-8.63181	6.03884e-18	1.47461e-16
158	Zm00001d001492	102.484	-3.37433	0.469505	-7.18699	6.62371e-13	1.06794e-11
159	Zm00001d028017	300.627	-3.36655	0.377064	-8.92833	4.32495e-19	1.14616e-17
160	Zm00001d024083	510.377	-3.36496	0.224079	-15.0169	5.69426e-51	6.09313e-49
161	Zm00001d038058	370.528	-3.36369	0.250668	-13.4189	4.68368e-41	3.62625e-39
162	Zm00001d005566	863.866	-3.3517	0.189652	-17.6729	6.78477e-70	1.1486e-67
163	Zm00001d044183	211.418	-3.33875	0.347748	-9.60106	7.91253e-22	2.58267e-20
164	Zm00001d039231	417.119	-3.33816	0.235174	-14.1944	9.91871e-46	8.8585e-44
165	Zm00001d050443	396.718	-3.32862	0.404059	-8.23797	1.75159e-16	3.79511e-15
166	Zm00001d042257	1165.11	-3.32035	0.191007	-17.3834	1.10214e-67	1.7484e-65
167	Zm00001d043419	292.968	-3.3183	0.441893	-7.50928	5.94554e-14	1.05206e-12
168	Zm00001d033271	335.904	-3.3065	0.282251	-11.7148	1.07071e-31	5.68829e-30
169	Zm00001d002101	111.586	-3.30636	0.401651	-8.23192	1.84236e-16	3.97281e-15
170	Zm00001d028639	390.415	-3.29376	0.330535	-9.96492	2.17053e-23	7.76631e-22
171	Zm00001d021906	493.062	-3.29105	0.315029	-10.4468	1.5152e-25	6.06214e-24
172	Zm00001d027447	1555.04	-3.29026	0.197813	-16.6332	4.00929e-62	5.35004e-60
173	Zm00001d031325	151.977	-3.28882	0.566682	-5.80364	6.48901e-09	6.7063e-08
174	Zm00001d045582	204.257	-3.28496	0.289869	-11.3326	9.05211e-30	4.42558e-28
175	Zm00001d051072	275.425	-3.27136	0.284437	-11.5012	1.30084e-30	6.6017e-29
176	Zm00001d043144	249.333	-3.26807	0.314506	-10.3911	2.72087e-25	1.08096e-23
177	Zm00001d037915	196.122	-3.26781	0.393847	-8.29715	1.06638e-16	2.35548e-15
178	Zm00001d025141	374.588	-3.26347	1.04492	-3.12318	0.00178911	0.00628849
179	Zm00001d002758	406.547	-3.26143	0.31459	-10.3672	3.49464e-25	1.37632e-23
180	Zm00001d044915	486.804	-3.25932	0.241896	-13.474	2.22365e-41	1.75762e-39
181	Zm00001d027196	86.7473	-3.25826	0.436031	-7.47255	7.86572e-14	1.37893e-12
182	Zm00001d020667	713.104	-3.24791	0.216271	-15.0178	5.61633e-51	6.03822e-49
183	Zm00001d029850	184.955	-3.24511	0.368433	-8.80787	1.27546e-18	3.26936e-17
184	Zm00001d031892	213.248	-3.2385	0.340901	-9.49983	2.1023e-21	6.68873e-20
185	Zm00001d015857	192.128	-3.23784	0.348601	-9.28811	1.57048e-20	4.66313e-19
186	Zm00001d032376	2655.62	-3.22075	0.230716	-13.9598	2.7414e-44	2.35563e-42
187	Zm00001d046471	367.483	-3.21853	0.877643	-3.66724	0.000245178	0.00109185
188	Zm00001d007341	220.317	-3.21731	0.381771	-8.42731	3.53698e-17	8.19576e-16
189	Zm00001d001820	5127.24	-3.21386	0.827736	-3.88271	0.000103297	0.000506329
190	Zm00001d036740	273.229	-3.20984	0.313557	-10.2369	1.35577e-24	5.16035e-23
191	Zm00001d018096	391.871	-3.20854	0.244036	-13.1478	1.75133e-39	1.25724e-37
192	Zm00001d003474	136.676	-3.20707	0.35497	-9.03476	1.64356e-19	4.48665e-18
193	Zm00001d040705	104.085	-3.20502	0.739503	-4.33402	1.46411e-05	8.56016e-05
194	Zm00001d033595	97.0641	-3.19567	0.442348	-7.22433	5.03573e-13	8.23023e-12
195	Zm00001d029656	228.143	-3.19524	0.297454	-10.742	6.4649e-27	2.76189e-25
196	Zm00001d034356	1594.73	-3.19435	0.243875	-13.0983	3.36724e-39	2.38706e-37
197	Zm00001d012420	21476.3	-3.19214	0.611772	-5.21787	1.80994e-07	1.49794e-06
198	Zm00001d022241	862.272	-3.18914	0.201489	-15.8279	1.99774e-56	2.36035e-54
199	Zm00001d028185	133.757	-3.18142	0.3737	-8.51328	1.69085e-17	3.99552e-16
200	Zm00001d032576	382.084	-3.17805	0.241742	-13.1465	1.78243e-39	1.27554e-37
201	Zm00001d014155	148.496	-3.17228	0.340447	-9.31799	1.18564e-20	3.57187e-19
202	Zm00001d038875	900.43	-3.16731	0.17769	-17.8249	4.52826e-71	7.90182e-69
203	Zm00001d020869	256.098	-3.16428	0.285795	-11.0718	1.71833e-28	7.89077e-27
204	Zm00001d015382	484.336	-3.16213	0.218812	-14.4514	2.45777e-47	2.35251e-45
205	Zm00001d001838	473.458	-3.16115	0.22752	-13.8939	6.89504e-44	5.81465e-42
206	Zm00001d044153	677.03	-3.16015	0.580221	-5.44646	5.13812e-08	4.65488e-07
207	Zm00001d038528	253.149	-3.15731	0.379119	-8.32801	8.22105e-17	1.84283e-15
208	Zm00001d046397	3031.36	-3.15332	0.184591	-17.0828	1.99473e-65	2.90067e-63
209	Zm00001d047301	198.929	-3.14951	0.307554	-10.2405	1.30549e-24	4.97731e-23
210	Zm00001d002164	2141.59	-3.14772	0.258163	-12.1928	3.39611e-34	2.02207e-32
211	Zm00001d036647	228.378	-3.14025	0.297008	-10.573	3.97743e-26	1.63753e-24
212	Zm00001d039935	91.2116	-3.13222	0.666687	-4.69819	2.62479e-06	1.7806e-05
213	Zm00001d018158	214.341	-3.1271	1.14687	-2.72664	0.00639828	0.0189065
214	Zm00001d008133	95.5598	-3.12327	0.443528	-7.04187	1.89676e-12	2.95522e-11
215	Zm00001d029853	520.934	-3.11204	0.354963	-8.76721	1.83143e-18	4.65763e-17
216	Zm00001d027488	779.717	-3.11191	0.227141	-13.7003	1.01052e-42	8.18698e-41
217	Zm00001d009350	183.246	-3.1112	0.301455	-10.3206	5.68517e-25	2.20082e-23
218	Zm00001d009608	495.757	-3.11049	0.296805	-10.4799	1.06852e-25	4.31306e-24
219	Zm00001d021457	78.6756	-3.10631	0.466463	-6.65928	2.7517e-11	3.79006e-10
220	Zm00001d006056	1896.35	-3.09982	0.177779	-17.4364	4.37045e-68	7.03147e-66
221	Zm00001d028230	132.939	-3.09792	0.397924	-7.78521	6.95956e-15	1.32226e-13
222	Zm00001d019100	501.06	-3.08995	0.293274	-10.5361	5.89195e-26	2.40394e-24
223	Zm00001d037529	201.925	-3.07953	0.30519	-10.0906	6.08266e-24	2.24366e-22
224	Zm00001d012291	426.433	-3.07501	0.259488	-11.8503	2.14528e-32	1.18408e-30
225	Zm00001d043985	490.437	-3.07435	0.246085	-12.493	8.14884e-36	5.12067e-34
226	Zm00001d046302	587.62	-3.07418	0.229692	-13.3839	7.50571e-41	5.73289e-39
227	Zm00001d009588	232.35	-3.06722	0.285629	-10.7385	6.71243e-27	2.86225e-25
228	Zm00001d017147	544.094	-3.06616	0.334411	-9.16883	4.78175e-20	1.36103e-18
229	Zm00001d015515	949.667	-3.06415	0.995802	-3.07706	0.00209051	0.00718425
230	Zm00001d049989	1109.28	-3.06021	0.182974	-16.7249	8.63736e-63	1.1663e-60
231	Zm00001d037483	3549.31	-3.05505	0.190931	-16.0008	1.26098e-57	1.51351e-55
232	Zm00001d014153	135.156	-3.05304	0.343768	-8.88112	6.61892e-19	1.72984e-17
233	Zm00001d048962	264.521	-3.05259	0.364634	-8.37166	5.68121e-17	1.29244e-15
234	Zm00001d047345	280.625	-3.04578	0.366765	-8.30445	1.00285e-16	2.21949e-15
235	Zm00001d001915	441.245	-3.04575	1.05207	-2.89502	0.00379139	0.012019
236	Zm00001d003276	178.997	-3.04123	0.330948	-9.18946	3.94823e-20	1.13088e-18
237	Zm00001d037112	119.117	-3.04085	0.363	-8.377	5.42954e-17	1.23913e-15
238	Zm00001d047973	4567.84	-3.03231	0.20766	-14.6023	2.7151e-48	2.65483e-46
239	Zm00001d051008	347.011	-3.02582	0.335461	-9.01987	1.88316e-19	5.12224e-18
240	Zm00001d018895	189.786	-3.02558	0.385089	-7.85684	3.93954e-15	7.66454e-14
241	Zm00001d036003	234.821	-3.02474	1.06914	-2.82913	0.00466746	0.0144135
242	Zm00001d044264	78.1846	-3.0137	0.561478	-5.36744	7.98608e-08	7.02187e-07
243	Zm00001d003742	769.088	-3.01247	0.254921	-11.8173	3.17866e-32	1.72921e-30
244	Zm00001d047553	585.376	-3.00971	0.811607	-3.70834	0.000208625	0.000950332
245	Zm00001d033230	840.836	-3.00875	0.202436	-14.8627	5.75645e-50	5.93568e-48
246	Zm00001d044744	503.776	-3.00706	0.669399	-4.49218	7.04991e-06	4.39119e-05
247	Zm00001d010507	84.24	-3.00651	0.452253	-6.64785	2.97401e-11	4.07646e-10
248	Zm00001d029340	504.764	-3.00134	0.275376	-10.8991	1.16441e-27	5.1692e-26
249	Zm00001d004357	484.229	-2.99795	0.265162	-11.3061	1.22402e-29	5.9331e-28
250	Zm00001d052934	248.061	-2.98676	0.288407	-10.3561	3.92768e-25	1.54418e-23
251	Zm00001d048227	83.8535	-2.9792	0.451041	-6.60516	3.97082e-11	5.3586e-10
252	Zm00001d010489	513.341	-2.97416	0.222547	-13.3642	9.79472e-41	7.43121e-39
253	Zm00001d023625	177.833	-2.96852	0.309672	-9.586	9.15692e-22	2.98027e-20
254	Zm00001d029566	343.069	-2.9683	0.293773	-10.1041	5.2997e-24	1.97088e-22
255	Zm00001d018839	142.824	-2.96632	0.385891	-7.68693	1.50713e-14	2.78414e-13
256	Zm00001d008229	302.294	-2.96008	0.2556	-11.5809	5.15031e-31	2.64332e-29
257	Zm00001d046786	1146.96	-2.95074	0.232673	-12.6819	7.44856e-37	4.88354e-35
258	Zm00001d020428	275.446	-2.94614	0.31822	-9.25817	2.07972e-20	6.11121e-19
259	Zm00001d010396	94.3766	-2.94207	0.404751	-7.26884	3.62599e-13	6.03047e-12
260	Zm00001d047582	176.103	-2.93934	0.431809	-6.80704	9.96275e-12	1.44504e-10
261	Zm00001d052584	780.214	-2.93829	0.218543	-13.4449	3.29696e-41	2.57902e-39
262	Zm00001d051556	84.8225	-2.92942	0.421113	-6.95638	3.49119e-12	5.27984e-11
263	Zm00001d031201	378.103	-2.92569	0.418448	-6.99177	2.71433e-12	4.16325e-11
264	Zm00001d021205	786.433	-2.92208	0.827405	-3.53162	0.000413021	0.00173668
265	Zm00001d050484	4106.95	-2.91174	0.160403	-18.1527	1.22319e-73	2.18488e-71
266	Zm00001d033618	94.8557	-2.90325	0.450136	-6.44972	1.1206e-10	1.45344e-09
267	Zm00001d031194	215.38	-2.89889	0.352008	-8.23529	1.79117e-16	3.86978e-15
268	Zm00001d016091	1090.13	-2.89877	0.203603	-14.2373	5.37331e-46	4.85632e-44
269	Zm00001d011551	223.192	-2.89392	0.271219	-10.6701	1.40548e-26	5.92627e-25
270	Zm00001d036426	704.939	-2.89008	0.207177	-13.9498	3.15437e-44	2.70026e-42
271	Zm00001d012419	86.1344	-2.88335	0.435303	-6.62377	3.50155e-11	4.76216e-10
272	Zm00001d038833	193.156	-2.8823	0.368006	-7.8322	4.79413e-15	9.24787e-14
273	Zm00001d023601	547.955	-2.8773	0.259586	-11.0842	1.4969e-28	6.91593e-27
274	Zm00001d048814	492.875	-2.87467	0.277066	-10.3754	3.20874e-25	1.26812e-23
275	Zm00001d043338	122.124	-2.8724	0.502265	-5.71889	1.07222e-08	1.07912e-07
276	Zm00001d029049	552.809	-2.86973	0.273171	-10.5052	8.17194e-26	3.31629e-24
277	Zm00001d014201	162.907	-2.86856	0.353622	-8.11194	4.9816e-16	1.04058e-14
278	Zm00001d031940	4671.04	-2.84172	0.178762	-15.8967	6.68247e-57	7.97852e-55
279	Zm00001d021843	173.05	-2.83597	0.307156	-9.23299	2.6318e-20	7.64435e-19
280	Zm00001d028554	8326.02	-2.83319	0.239337	-11.8376	2.49363e-32	1.37301e-30
281	Zm00001d014702	358.681	-2.83279	0.226658	-12.4981	7.65034e-36	4.83421e-34
282	Zm00001d038897	100.894	-2.83274	0.411761	-6.87957	6.0035e-12	8.91291e-11
283	Zm00001d015125	446.572	-2.83064	0.269115	-10.5183	7.11273e-26	2.89681e-24
284	Zm00001d021185	82.4241	-2.82759	0.419246	-6.74446	1.53593e-11	2.18175e-10
285	Zm00001d051544	1492.31	-2.82724	0.173691	-16.2774	1.42758e-59	1.78921e-57
286	Zm00001d049539	1323.43	-2.82437	0.218953	-12.8994	4.53542e-38	3.08967e-36
287	Zm00001d015481	182.128	-2.81827	0.342818	-8.22088	2.02007e-16	4.33542e-15
288	Zm00001d035767	326.932	-2.80034	0.353978	-7.91107	2.55181e-15	5.01193e-14
289	Zm00001d010434	371.415	-2.79722	0.221785	-12.6123	1.80599e-36	1.1672e-34
290	Zm00001d051887	94.9209	-2.79533	0.451718	-6.18822	6.08493e-10	7.20066e-09
291	Zm00001d026120	85.6106	-2.79119	0.483075	-5.77797	7.5609e-09	7.74352e-08
292	Zm00001d042102	1688.35	-2.78863	0.152909	-18.2372	2.61715e-74	4.74961e-72
293	Zm00001d031806	78.0607	-2.78456	0.456568	-6.09891	1.06795e-09	1.22852e-08
294	Zm00001d011656	466.187	-2.77914	0.387899	-7.16459	7.80185e-13	1.25078e-11
295	Zm00001d011687	2004.99	-2.77289	0.170433	-16.2697	1.6204e-59	2.01972e-57
296	Zm00001d026047	751.852	-2.76602	0.288166	-9.5987	8.0962e-22	2.63883e-20
297	Zm00001d006010	18682.5	-2.76453	0.437655	-6.31668	2.67245e-10	3.30559e-09
298	Zm00001d043271	68.7446	-2.75795	0.495785	-5.56279	2.65492e-08	2.51995e-07
299	Zm00001d030106	5321.21	-2.75682	0.189501	-14.5478	6.03035e-48	5.82122e-46
300	Zm00001d044138	1948.59	-2.75618	0.192084	-14.3488	1.08349e-46	1.00734e-44
301	Zm00001d043340	92.2874	-2.74575	0.412583	-6.65503	2.83243e-11	3.88945e-10
302	Zm00001d015328	4199.01	-2.74298	0.159067	-17.2441	1.23841e-66	1.84824e-64
303	Zm00001d012213	2058.47	-2.74164	0.158897	-17.2541	1.04156e-66	1.57518e-64
304	Zm00001d007885	151.638	-2.7402	0.35063	-7.81506	5.49362e-15	1.05256e-13
305	Zm00001d010586	101.24	-2.73717	0.401155	-6.82322	8.90208e-12	1.29867e-10
306	Zm00001d045615	141.236	-2.73566	0.419705	-6.51806	7.12203e-11	9.39868e-10
307	Zm00001d018645	56.5304	-2.7328	0.531578	-5.14092	2.73395e-07	2.2024e-06
308	Zm00001d002158	450.913	-2.72881	0.307043	-8.88736	6.25765e-19	1.643e-17
309	Zm00001d041148	118.571	-2.72838	0.383114	-7.12158	1.06694e-12	1.68901e-11
310	Zm00001d028434	160.063	-2.72824	0.378518	-7.20769	5.69102e-13	9.28116e-12
311	Zm00001d032598	1222.89	-2.72304	0.173763	-15.671	2.38875e-55	2.77892e-53
312	Zm00001d016564	354.471	-2.72202	0.240001	-11.3417	8.1517e-30	4.00263e-28
313	Zm00001d017567	83.7946	-2.71987	0.463196	-5.87198	4.30623e-09	4.57336e-08
314	Zm00001d026941	215.016	-2.71466	0.388165	-6.99359	2.67944e-12	4.11253e-11
315	Zm00001d023811	158.493	-2.71449	0.431077	-6.297	3.03458e-10	3.71704e-09
316	Zm00001d016933	139.127	-2.70987	0.363996	-7.44479	9.70975e-14	1.69045e-12
317	Zm00001d034555	2314.61	-2.70311	0.223923	-12.0716	1.49146e-33	8.58725e-32
318	Zm00001d039859	13944.1	-2.7009	0.18047	-14.9659	1.22637e-50	1.29396e-48
319	Zm00001d014460	1867.4	-2.68356	0.200283	-13.3988	6.14515e-41	4.74159e-39
320	Zm00001d019422	159.151	-2.6829	0.510297	-5.25752	1.46014e-07	1.22633e-06
321	Zm00001d014469	66.49	-2.67563	0.4616	-5.79642	6.77438e-09	6.97896e-08
322	Zm00001d034330	312.793	-2.67086	0.252496	-10.5778	3.77563e-26	1.56011e-24
323	Zm00001d053006	385.712	-2.66337	0.267281	-9.96467	2.17589e-23	7.77323e-22
324	Zm00001d008307	169.391	-2.65859	0.395253	-6.72629	1.74044e-11	2.44925e-10
325	Zm00001d038268	203.738	-2.65063	0.323002	-8.20625	2.28198e-16	4.86988e-15
326	Zm00001d052194	14907	-2.64709	0.788513	-3.35706	0.000787764	0.00307475
327	Zm00001d006875	151.614	-2.64471	0.393431	-6.72217	1.7904e-11	2.5143e-10
328	Zm00001d020556	213.386	-2.63952	0.295429	-8.93452	4.08945e-19	1.08629e-17
329	Zm00001d001924	504.797	-2.63847	0.302073	-8.73455	2.44637e-18	6.15253e-17
330	Zm00001d038806	7719.17	-2.63804	0.643093	-4.10211	4.09406e-05	0.00021786
331	Zm00001d033340	112.983	-2.63371	0.417275	-6.31168	2.76031e-10	3.40869e-09
332	Zm00001d016194	714.303	-2.63217	0.244022	-10.7866	3.98223e-27	1.72399e-25
333	Zm00001d049120	2699.41	-2.63185	0.213217	-12.3435	5.28061e-35	3.19442e-33
334	Zm00001d010496	533.912	-2.63184	0.239226	-11.0015	3.75831e-28	1.69161e-26
335	Zm00001d028451	89.1635	-2.62755	0.522716	-5.02673	4.98917e-07	3.82363e-06
336	Zm00001d005378	132.938	-2.62633	0.366567	-7.16467	7.79735e-13	1.25078e-11
337	Zm00001d017645	70.3519	-2.62161	0.598005	-4.38393	1.16559e-05	6.95459e-05
338	Zm00001d007891	246.023	-2.61891	0.293194	-8.93236	4.17015e-19	1.10643e-17
339	Zm00001d031175	198.687	-2.61703	0.39315	-6.65657	2.80288e-11	3.85587e-10
340	Zm00001d011377	601.696	-2.61479	0.240678	-10.8643	1.70598e-27	7.48461e-26
341	Zm00001d043806	397.226	-2.61328	0.232901	-11.2205	3.23284e-29	1.53425e-27
342	Zm00001d027749	677.614	-2.61265	0.276897	-9.43549	3.89184e-21	1.20775e-19
343	Zm00001d026786	2326.4	-2.6108	0.198154	-13.1756	1.21215e-39	8.7852e-38
344	Zm00001d029288	171.405	-2.61008	0.313161	-8.33463	7.77441e-17	1.74963e-15
345	Zm00001d053733	133.017	-2.60895	0.645269	-4.04319	5.27291e-05	0.000274979
346	Zm00001d014135	397.36	-2.60709	0.27732	-9.40102	5.40381e-21	1.66105e-19
347	Zm00001d013958	158.462	-2.60589	0.325753	-7.99958	1.24844e-15	2.50849e-14
348	Zm00001d015175	189.789	-2.60544	0.328268	-7.93692	2.07266e-15	4.11358e-14
349	Zm00001d043740	198.748	-2.60315	0.532874	-4.88512	1.03368e-06	7.49411e-06
350	Zm00001d013810	492.065	-2.59425	0.272273	-9.52811	1.60168e-21	5.1247e-20
351	Zm00001d021059	108.54	-2.58998	0.444839	-5.82229	5.80455e-09	6.06802e-08
352	Zm00001d046754	2667.97	-2.58728	0.216346	-11.959	5.82665e-33	3.27984e-31
353	Zm00001d026043	96.2012	-2.579	0.52956	-4.87009	1.1155e-06	8.03848e-06
354	Zm00001d026611	70.4415	-2.57893	0.486718	-5.29861	1.16686e-07	9.97747e-07
355	Zm00001d005885	534.773	-2.57752	0.314607	-8.19284	2.55134e-16	5.41414e-15
356	Zm00001d040614	61.1375	-2.57659	0.564846	-4.56157	5.07717e-06	3.26e-05
357	Zm00001d026224	1249.26	-2.57297	0.276291	-9.31254	1.24814e-20	3.75021e-19
358	Zm00001d027837	48.8731	-2.5703	0.566307	-4.53869	5.66039e-06	3.6014e-05
359	Zm00001d033793	243.359	-2.56959	0.306751	-8.37678	5.43939e-17	1.24013e-15
360	Zm00001d034175	663.789	-2.56867	0.181569	-14.1471	1.947e-45	1.71192e-43
361	Zm00001d023840	333.027	-2.56775	0.240032	-10.6975	1.04548e-26	4.43304e-25
362	Zm00001d036674	77.5499	-2.56771	0.462273	-5.55453	2.78363e-08	2.6344e-07
363	Zm00001d046119	121.755	-2.56371	0.375985	-6.81865	9.19013e-12	1.33554e-10
364	Zm00001d011630	192.105	-2.56264	0.402065	-6.37369	1.84532e-10	2.3282e-09
365	Zm00001d039566	28139.3	-2.5586	0.223009	-11.4731	1.80098e-30	9.0588e-29
366	Zm00001d030282	1372.96	-2.55792	0.202588	-12.6262	1.51374e-36	9.81122e-35
367	Zm00001d039139	155.349	-2.55623	0.346034	-7.38721	1.49937e-13	2.57091e-12
368	Zm00001d003471	110.625	-2.54699	0.423458	-6.01475	1.80164e-09	2.01331e-08
369	Zm00001d011064	287.691	-2.54374	0.25179	-10.1026	5.378e-24	1.99673e-22
370	Zm00001d013409	369.039	-2.54254	0.314975	-8.07218	6.90537e-16	1.42278e-14
371	Zm00001d033987	417.377	-2.5367	0.424047	-5.98212	2.20248e-09	2.43367e-08
372	Zm00001d014481	133.385	-2.53359	0.390427	-6.48928	8.62493e-11	1.13096e-09
373	Zm00001d033901	225.435	-2.53029	0.271715	-9.31226	1.25136e-20	3.75491e-19
374	Zm00001d023387	59.6173	-2.528	0.748747	-3.37631	0.00073466	0.00288885
375	Zm00001d014253	70.1926	-2.52517	0.799575	-3.15814	0.00158779	0.00566158
376	Zm00001d000548	121.836	-2.52495	0.397024	-6.35969	2.02159e-10	2.5295e-09
377	Zm00001d050198	3568.95	-2.52348	0.243895	-10.3466	4.33758e-25	1.69069e-23
378	Zm00001d052154	95.9677	-2.51813	0.450694	-5.58722	2.30728e-08	2.20753e-07
379	Zm00001d031526	1195.46	-2.5179	0.166526	-15.1202	1.19218e-51	1.30651e-49
380	Zm00001d040026	38623.5	-2.51691	0.143635	-17.5229	9.57942e-69	1.5747e-66
381	Zm00001d017418	673.792	-2.51445	0.191065	-13.1602	1.48776e-39	1.07143e-37
382	Zm00001d027888	345.733	-2.51434	0.324553	-7.7471	9.40165e-15	1.76553e-13
383	Zm00001d034190	257.807	-2.50128	0.350009	-7.14633	8.91296e-13	1.42287e-11
384	Zm00001d044826	637.426	-2.50072	0.200619	-12.465	1.1582e-35	7.17863e-34
385	Zm00001d016098	110.376	-2.49625	0.385082	-6.48238	9.02887e-11	1.18256e-09
386	Zm00001d007686	157.364	-2.49601	0.340764	-7.32476	2.39335e-13	4.05172e-12
387	Zm00001d039302	141.892	-2.4939	0.488145	-5.10893	3.23989e-07	2.57162e-06
388	Zm00001d030672	151.675	-2.49351	0.372365	-6.69641	2.13602e-11	2.97638e-10
389	Zm00001d052910	952.603	-2.49306	0.211458	-11.7899	4.40207e-32	2.37764e-30
390	Zm00001d024687	222.949	-2.49034	0.358481	-6.94694	3.73302e-12	5.63056e-11
391	Zm00001d020195	1325.91	-2.48976	0.228062	-10.917	9.55795e-28	4.25977e-26
392	Zm00001d042182	445.146	-2.48824	0.290109	-8.57691	9.74547e-18	2.34439e-16
393	Zm00001d013257	743.403	-2.48511	0.184573	-13.4641	2.54367e-41	1.99665e-39
394	Zm00001d051739	81.4863	-2.48474	0.429012	-5.79177	6.96491e-09	7.16549e-08
395	Zm00001d025957	79.6201	-2.48379	0.514057	-4.83174	1.35346e-06	9.61277e-06
396	Zm00001d051966	523.234	-2.47859	0.220596	-11.2359	2.71704e-29	1.30034e-27
397	Zm00001d020877	178.7	-2.47752	0.449364	-5.5134	3.5197e-08	3.28038e-07
398	Zm00001d010957	109.733	-2.47668	0.422581	-5.86084	4.60544e-09	4.87287e-08
399	Zm00001d006855	1135.57	-2.46973	0.235085	-10.5057	8.13181e-26	3.30592e-24
400	Zm00001d008303	353.419	-2.46951	0.279705	-8.82898	1.05631e-18	2.7292e-17
401	Zm00001d018656	93.3809	-2.46614	0.464103	-5.31378	1.07377e-07	9.25121e-07
402	Zm00001d022044	262.844	-2.46488	0.448237	-5.49906	3.81811e-08	3.54248e-07
403	Zm00001d013338	132.052	-2.45864	0.487524	-5.04312	4.58007e-07	3.53518e-06
404	Zm00001d048837	227.334	-2.44844	0.263703	-9.28484	1.61956e-20	4.80259e-19
405	Zm00001d043222	89.927	-2.44768	0.420669	-5.81856	5.93582e-09	6.19099e-08
406	Zm00001d038283	450.882	-2.44684	0.306168	-7.99183	1.32951e-15	2.66431e-14
407	Zm00001d024894	638.984	-2.44571	0.188023	-13.0075	1.10911e-38	7.6708e-37
408	Zm00001d027315	65.165	-2.44505	0.472703	-5.17248	2.31007e-07	1.88097e-06
409	Zm00001d006591	1579.24	-2.44449	0.528551	-4.62489	3.74789e-06	2.46938e-05
410	Zm00001d044703	200.97	-2.44361	0.435256	-5.61418	1.97492e-08	1.91458e-07
411	Zm00001d033972	272.3	-2.44086	0.263385	-9.26725	1.91004e-20	5.64184e-19
412	Zm00001d009583	64.9132	-2.44014	0.472868	-5.16029	2.46561e-07	1.99616e-06
413	Zm00001d005457	330.567	-2.43658	0.286049	-8.51805	1.62261e-17	3.84629e-16
414	Zm00001d020937	165.98	-2.43476	0.328331	-7.41556	1.21116e-13	2.09096e-12
415	Zm00001d009861	63.5814	-2.42778	0.542159	-4.47799	7.5349e-06	4.66255e-05
416	Zm00001d044261	4924.06	-2.42617	0.137781	-17.6088	2.10846e-69	3.51693e-67
417	Zm00001d012508	1267.26	-2.42581	0.296578	-8.17935	2.85386e-16	6.03354e-15
418	Zm00001d044293	78.9474	-2.42544	0.463343	-5.23465	1.65298e-07	1.37657e-06
419	Zm00001d033330	368.635	-2.42472	0.261834	-9.26054	2.034e-20	5.98461e-19
420	Zm00001d011133	117.484	-2.42387	0.624551	-3.88098	0.000104037	0.000509514
421	Zm00001d039739	133.635	-2.42239	0.405847	-5.96873	2.39107e-09	2.62925e-08
422	Zm00001d029461	71.1228	-2.42178	0.485795	-4.9852	6.18985e-07	4.66501e-06
423	Zm00001d004882	85.0539	-2.42125	0.500993	-4.8329	1.34556e-06	9.56568e-06
424	Zm00001d007072	1197.44	-2.41433	0.169612	-14.2344	5.60257e-46	5.04342e-44
425	Zm00001d008181	1849.54	-2.4141	0.164238	-14.6988	6.56312e-49	6.5015e-47
426	Zm00001d038310	6212.93	-2.40982	0.166833	-14.4445	2.7149e-47	2.58771e-45
427	Zm00001d007567	75.9136	-2.40881	0.472524	-5.09776	3.43703e-07	2.71574e-06
428	Zm00001d043523	96.059	-2.40841	0.428272	-5.62356	1.87061e-08	1.81734e-07
429	Zm00001d026383	84.8892	-2.40638	0.435267	-5.52851	3.22953e-08	3.02735e-07
430	Zm00001d011639	245.316	-2.40165	0.432548	-5.55234	2.81876e-08	2.66432e-07
431	Zm00001d015310	243.967	-2.4	0.285072	-8.41893	3.79942e-17	8.77698e-16
432	Zm00001d014127	395.292	-2.39787	0.240209	-9.98243	1.81959e-23	6.5416e-22
433	Zm00001d007564	60.7627	-2.39602	0.506447	-4.73104	2.23376e-06	1.53229e-05
434	Zm00001d042980	901.02	-2.39187	0.301812	-7.92503	2.28088e-15	4.5032e-14
435	Zm00001d037914	362.934	-2.39106	0.839816	-2.84713	0.00441157	0.0137317
436	Zm00001d038853	133.938	-2.38968	0.362905	-6.58486	4.55305e-11	6.12974e-10
437	Zm00001d023374	65.0359	-2.38797	0.508209	-4.6988	2.6169e-06	1.77631e-05
438	Zm00001d048859	381.116	-2.38711	0.300912	-7.93293	2.14027e-15	4.23295e-14
439	Zm00001d018244	230.05	-2.38622	0.34737	-6.86938	6.44796e-12	9.52912e-11
440	Zm00001d010970	1281.95	-2.38166	0.221828	-10.7365	6.85796e-27	2.91881e-25
441	Zm00001d018028	1783.18	-2.3805	0.164193	-14.4981	1.24507e-47	1.1968e-45
442	Zm00001d044079	699.439	-2.37205	0.23078	-10.2784	8.81446e-25	3.38335e-23
443	Zm00001d001944	104.091	-2.37202	0.416656	-5.693	1.24823e-08	1.24139e-07
444	Zm00001d044677	618.34	-2.37155	0.270381	-8.77114	1.76868e-18	4.50815e-17
445	Zm00001d018086	300.376	-2.36601	0.265469	-8.91259	4.98556e-19	1.31662e-17
446	Zm00001d005748	279.286	-2.3652	0.302476	-7.81945	5.30535e-15	1.0182e-13
447	Zm00001d003435	2202.92	-2.36116	0.178251	-13.2462	4.7434e-40	3.48233e-38
448	Zm00001d038067	204.326	-2.36112	0.303149	-7.78864	6.77321e-15	1.28901e-13
449	Zm00001d053897	124.395	-2.36098	0.472983	-4.99167	5.9858e-07	4.53082e-06
450	Zm00001d041282	75.9607	-2.35933	0.61845	-3.81491	0.000136235	0.000648853
451	Zm00001d040725	6725.83	-2.3574	0.185941	-12.6782	7.81147e-37	5.09205e-35
452	Zm00001d018797	1011.3	-2.35503	0.302923	-7.77436	7.58305e-15	1.43711e-13
453	Zm00001d037197	545.159	-2.35488	0.259876	-9.06155	1.28613e-19	3.53648e-18
454	Zm00001d042768	83.0092	-2.35366	0.445155	-5.28728	1.24151e-07	1.0572e-06
455	Zm00001d048215	341.331	-2.35307	0.301543	-7.80344	6.02428e-15	1.15131e-13
456	Zm00001d028408	680.506	-2.35153	0.294076	-7.99632	1.28195e-15	2.57353e-14
457	Zm00001d030815	56.0695	-2.34968	0.505339	-4.6497	3.32416e-06	2.21517e-05
458	Zm00001d048166	242.751	-2.34836	0.283778	-8.27535	1.28075e-16	2.79901e-15
459	Zm00001d030368	892.145	-2.34633	0.206887	-11.3411	8.2106e-30	4.02284e-28
460	Zm00001d000316	786.982	-2.34277	0.322085	-7.27377	3.49592e-13	5.82696e-12
461	Zm00001d019768	396.872	-2.3404	0.248204	-9.42934	4.12686e-21	1.27719e-19
462	Zm00001d039300	848.466	-2.33675	0.183368	-12.7435	3.38741e-37	2.25347e-35
463	Zm00001d002143	156.053	-2.33266	0.367365	-6.34972	2.15708e-10	2.69308e-09
464	Zm00001d043923	940.098	-2.3321	0.209051	-11.1557	6.71919e-29	3.14927e-27
465	Zm00001d043652	142.066	-2.32748	0.562734	-4.13602	3.53384e-05	0.000190915
466	Zm00001d022355	574.857	-2.32688	0.186506	-12.4761	1.00747e-35	6.26151e-34
467	Zm00001d032213	184.551	-2.32513	0.356503	-6.52203	6.93636e-11	9.16966e-10
468	Zm00001d018106	410.198	-2.32481	0.824343	-2.8202	0.00479938	0.0147726
469	Zm00001d042922	7540.7	-2.32296	0.596614	-3.89358	9.87757e-05	0.00048722
470	Zm00001d013311	418.418	-2.32152	0.290352	-7.99556	1.28991e-15	2.58723e-14
471	Zm00001d047044	8384.91	-2.31798	0.168132	-13.7866	3.06863e-43	2.54989e-41
472	Zm00001d027355	263.772	-2.31655	0.425989	-5.43806	5.38649e-08	4.86242e-07
473	Zm00001d004220	1965.07	-2.31051	0.467338	-4.94397	7.65473e-07	5.68033e-06
474	Zm00001d016567	450.895	-2.30697	0.254219	-9.07473	1.13958e-19	3.14877e-18
475	Zm00001d041650	169.677	-2.305	0.357429	-6.44884	1.12711e-10	1.46106e-09
476	Zm00001d016733	246.419	-2.30491	0.318632	-7.23377	4.69781e-13	7.7057e-12
477	Zm00001d041791	1044.67	-2.30221	0.220185	-10.4558	1.37883e-25	5.52627e-24
478	Zm00001d030909	154.684	-2.30194	0.357227	-6.44393	1.16422e-10	1.50572e-09
479	Zm00001d037977	243.617	-2.3008	0.396945	-5.79627	6.78057e-09	6.98217e-08
480	Zm00001d013339	1363.94	-2.2979	0.171803	-13.3752	8.44328e-41	6.42737e-39
481	Zm00001d020954	3023.7	-2.29408	0.227108	-10.1013	5.45375e-24	2.02154e-22
482	Zm00001d039112	228.211	-2.29128	0.370408	-6.18584	6.17739e-10	7.30246e-09
483	Zm00001d049242	386.092	-2.28956	0.836696	-2.73642	0.0062111	0.0184133
484	Zm00001d029378	8033.65	-2.28673	0.133968	-17.0692	2.51525e-65	3.6343e-63
485	Zm00001d037361	137.374	-2.28624	0.498	-4.59085	4.41452e-06	2.87686e-05
486	Zm00001d032148	104.081	-2.28242	0.396785	-5.75228	8.80504e-09	8.96509e-08
487	Zm00001d001082	84.5694	-2.27756	0.525372	-4.33513	1.45677e-05	8.52159e-05
488	Zm00001d010360	350.206	-2.27679	0.232993	-9.77193	1.48588e-22	5.03844e-21
489	Zm00001d044518	68.2662	-2.27583	0.472142	-4.82022	1.434e-06	1.01594e-05
490	Zm00001d011842	564.082	-2.27569	0.192265	-11.8362	2.5358e-32	1.39285e-30
491	Zm00001d025519	101.478	-2.27504	0.474158	-4.79808	1.60198e-06	1.1258e-05
492	Zm00001d018703	1842.7	-2.26934	0.192572	-11.7844	4.7002e-32	2.53264e-30
493	Zm00001d001906	43.9013	-2.26886	0.568596	-3.99029	6.59931e-05	0.000337859
494	Zm00001d047187	4662.22	-2.268	0.240658	-9.42415	4.33594e-21	1.33824e-19
495	Zm00001d023381	394.603	-2.26795	0.251531	-9.01656	1.94089e-19	5.27294e-18
496	Zm00001d004753	503.865	-2.26498	0.253235	-8.94416	3.74784e-19	1.00377e-17
497	Zm00001d045420	632.607	-2.26368	0.23766	-9.52489	1.65214e-21	5.2787e-20
498	Zm00001d051562	665.776	-2.26241	0.18896	-11.973	4.92412e-33	2.7787e-31
499	Zm00001d002564	88.6125	-2.26169	0.484206	-4.67092	2.9985e-06	2.01126e-05
500	Zm00001d011419	84.7987	-2.26075	0.466709	-4.84403	1.2723e-06	9.09043e-06
501	Zm00001d038164	2326.46	-2.26029	0.577286	-3.91537	9.02667e-05	0.000449155
502	Zm00001d038946	311.685	-2.25521	0.255941	-8.81144	1.23549e-18	3.17408e-17
503	Zm00001d044771	155.208	-2.25328	0.351486	-6.41072	1.44834e-10	1.84894e-09
504	Zm00001d051877	168.475	-2.24968	0.29643	-7.58922	3.21827e-14	5.808e-13
505	Zm00001d017422	81.9128	-2.24862	0.499857	-4.49852	6.84278e-06	4.27626e-05
506	Zm00001d049384	172.209	-2.24516	0.31162	-7.20481	5.81264e-13	9.45573e-12
507	Zm00001d042631	335.994	-2.24435	0.246157	-9.11755	7.68384e-20	2.15728e-18
508	Zm00001d018298	5541.87	-2.2403	0.489871	-4.57324	4.8023e-06	3.09929e-05
509	Zm00001d008308	94.4039	-2.23875	0.419656	-5.33474	9.56824e-08	8.30676e-07
510	Zm00001d033313	224.298	-2.23857	0.328057	-6.82372	8.87129e-12	1.29501e-10
511	Zm00001d021763	3289.28	-2.23768	0.168576	-13.274	3.27423e-40	2.42732e-38
512	Zm00001d048242	431.431	-2.2356	0.241171	-9.2698	1.86493e-20	5.51576e-19
513	Zm00001d053816	2900.81	-2.23352	0.171071	-13.0561	5.86418e-39	4.13134e-37
514	Zm00001d017107	288.231	-2.23156	0.284355	-7.8478	4.23385e-15	8.22302e-14
515	Zm00001d052492	71.6263	-2.2311	0.468769	-4.75949	1.94084e-06	1.34354e-05
516	Zm00001d028368	928.041	-2.23101	0.207391	-10.7575	5.46348e-27	2.34733e-25
517	Zm00001d039303	211.164	-2.23058	0.312152	-7.14582	8.9458e-13	1.42711e-11
518	Zm00001d047150	104.588	-2.22983	0.42303	-5.27108	1.3562e-07	1.14583e-06
519	Zm00001d048799	98.5028	-2.22239	0.493241	-4.50569	6.61578e-06	4.14812e-05
520	Zm00001d048983	671.639	-2.21933	0.26251	-8.45427	2.80833e-17	6.56773e-16
521	Zm00001d013759	986.544	-2.21872	0.240356	-9.23095	2.68254e-20	7.78177e-19
522	Zm00001d033862	185.056	-2.21355	0.44949	-4.92457	8.45449e-07	6.22898e-06
523	Zm00001d035115	557.263	-2.21172	0.302714	-7.3063	2.74594e-13	4.62105e-12
524	Zm00001d032003	792.602	-2.20805	0.229901	-9.60438	7.66194e-22	2.50448e-20
525	Zm00001d018901	494.854	-2.20791	0.24746	-8.92227	4.56842e-19	1.20927e-17
526	Zm00001d053234	171.937	-2.20775	0.393691	-5.60783	2.04876e-08	1.97771e-07
527	Zm00001d039377	53.2896	-2.20654	0.520374	-4.2403	2.23223e-05	0.00012606
528	Zm00001d017706	222.708	-2.20363	0.373944	-5.89295	3.79357e-09	4.06349e-08
529	Zm00001d005451	6688.05	-2.2036	0.16893	-13.0445	6.82928e-39	4.78155e-37
530	Zm00001d019450	261.815	-2.20356	0.294912	-7.47193	7.90271e-14	1.38435e-12
531	Zm00001d000308	253.675	-2.19915	0.347352	-6.33117	2.43315e-10	3.02444e-09
532	Zm00001d016164	1666.57	-2.1979	0.164868	-13.3312	1.5241e-40	1.15247e-38
533	Zm00001d052106	519.888	-2.19437	0.247134	-8.87926	6.73041e-19	1.75494e-17
534	Zm00001d028809	198.523	-2.19347	0.367463	-5.96924	2.38367e-09	2.62238e-08
535	Zm00001d013170	89.1386	-2.18817	0.434858	-5.03191	4.85605e-07	3.72916e-06
536	Zm00001d005813	7745.31	-2.18759	0.145748	-15.0094	6.37065e-51	6.78489e-49
537	Zm00001d008437	72.3703	-2.18626	0.48687	-4.49044	7.10747e-06	4.42098e-05
538	Zm00001d001703	82.1711	-2.18437	0.591399	-3.69357	0.000221128	0.000997869
539	Zm00001d053886	492.053	-2.18186	0.22325	-9.77317	1.46785e-22	4.98474e-21
540	Zm00001d022277	457.33	-2.181	0.310489	-7.02442	2.14959e-12	3.33996e-11
541	Zm00001d052639	797.484	-2.17936	0.21052	-10.3523	4.08554e-25	1.6007e-23
542	Zm00001d045581	1954.12	-2.17918	0.146555	-14.8693	5.212e-50	5.39882e-48
543	Zm00001d007486	62.8117	-2.1768	0.468707	-4.64427	3.41273e-06	2.27098e-05
544	Zm00001d046112	128.936	-2.17522	0.433227	-5.02097	5.14122e-07	3.92953e-06
545	Zm00001d048073	919.282	-2.17507	0.283221	-7.67976	1.59391e-14	2.94206e-13
546	Zm00001d027622	84.8354	-2.17361	0.516432	-4.2089	2.56615e-05	0.000143206
547	Zm00001d012274	168.31	-2.1722	0.315858	-6.87713	6.10722e-12	9.04323e-11
548	Zm00001d017843	62.6774	-2.1681	0.468751	-4.62526	3.74122e-06	2.4657e-05
549	Zm00001d008392	98.1248	-2.16616	0.47245	-4.58496	4.54078e-06	2.94729e-05
550	Zm00001d043771	298.616	-2.1634	0.291299	-7.42674	1.11307e-13	1.926e-12
551	Zm00001d014649	419.483	-2.16216	0.254033	-8.51133	1.71951e-17	4.059e-16
552	Zm00001d011902	283.766	-2.15829	0.275168	-7.84353	4.38059e-15	8.48622e-14
553	Zm00001d003806	909.986	-2.1578	0.211486	-10.203	1.9217e-24	7.26562e-23
554	Zm00001d001479	183.112	-2.15561	0.345175	-6.24497	4.23893e-10	5.12581e-09
555	Zm00001d021202	1814.08	-2.15483	0.149593	-14.4046	4.84076e-47	4.53771e-45
556	Zm00001d017101	828.239	-2.15338	0.190363	-11.312	1.14494e-29	5.56168e-28
557	Zm00001d036641	4319.52	-2.15054	0.144738	-14.8581	6.16294e-50	6.32608e-48
558	Zm00001d028008	469.907	-2.14884	0.219483	-9.79045	1.23746e-22	4.22131e-21
559	Zm00001d020915	70.7733	-2.14495	0.603638	-3.55337	0.000380325	0.00161446
560	Zm00001d025704	110.116	-2.13895	0.412495	-5.18539	2.15558e-07	1.76341e-06
561	Zm00001d043944	104.722	-2.13316	0.395132	-5.3986	6.71624e-08	5.98656e-07
562	Zm00001d009549	747.971	-2.13279	0.220291	-9.68167	3.6077e-22	1.19301e-20
563	Zm00001d005874	1039.1	-2.13212	0.213273	-9.99711	1.56902e-23	5.6587e-22
564	Zm00001d008891	331.213	-2.13211	0.24332	-8.76255	1.90879e-18	4.84893e-17
565	Zm00001d048263	287.765	-2.12783	0.411516	-5.17071	2.33205e-07	1.89751e-06
566	Zm00001d041792	195.538	-2.12555	0.423149	-5.02316	5.08269e-07	3.89004e-06
567	Zm00001d037562	546.643	-2.12304	0.255912	-8.29597	1.07699e-16	2.37661e-15
568	Zm00001d019538	193.151	-2.12197	0.341488	-6.21389	5.16878e-10	6.18754e-09
569	Zm00001d002069	4324.89	-2.12162	0.157482	-13.4722	2.28067e-41	1.79642e-39
570	Zm00001d036680	274.027	-2.11656	0.297911	-7.10465	1.20624e-12	1.90422e-11
571	Zm00001d002100	110.757	-2.11652	0.372164	-5.68707	1.29239e-08	1.28194e-07
572	Zm00001d020552	297.765	-2.11543	0.833355	-2.53846	0.0111343	0.0302022
573	Zm00001d034455	515.819	-2.11467	0.21759	-9.71856	2.51305e-22	8.3836e-21
574	Zm00001d010700	574.647	-2.11275	0.203655	-10.3742	3.25025e-25	1.28229e-23
575	Zm00001d033132	1771.2	-2.11143	0.229963	-9.1816	4.24726e-20	1.21346e-18
576	Zm00001d052961	326.459	-2.11004	0.309082	-6.82678	8.68406e-12	1.2685e-10
577	Zm00001d007210	103.95	-2.1081	0.462965	-4.55347	5.27679e-06	3.3767e-05
578	Zm00001d026173	324.989	-2.10676	0.230338	-9.14637	5.888e-20	1.66753e-18
579	Zm00001d042259	486.449	-2.10667	0.229283	-9.18805	4.00031e-20	1.14435e-18
580	Zm00001d012019	52.3323	-2.10163	0.574402	-3.65882	0.000253383	0.00112521
581	Zm00001d008514	844.099	-2.10117	0.198624	-10.5786	3.74495e-26	1.55026e-24
582	Zm00001d012492	1740.09	-2.0982	0.160386	-13.0821	4.16492e-39	2.94334e-37
583	Zm00001d011228	121.047	-2.09794	0.679836	-3.08594	0.00202907	0.00700706
584	Zm00001d021040	72.363	-2.09714	0.49527	-4.23434	2.29222e-05	0.000129126
585	Zm00001d007992	92.7194	-2.09448	0.414957	-5.04747	4.47692e-07	3.46297e-06
586	Zm00001d003999	478.132	-2.0923	0.270766	-7.72731	1.09842e-14	2.04746e-13
587	Zm00001d043399	210.76	-2.09166	0.32686	-6.39925	1.56146e-10	1.98441e-09
588	Zm00001d039931	315.311	-2.09099	0.338574	-6.17586	6.58037e-10	7.75056e-09
589	Zm00001d049990	68.5584	-2.09038	0.510154	-4.09755	4.17545e-05	0.000221723
590	Zm00001d017866	1481.86	-2.08762	0.161735	-12.9077	4.07327e-38	2.7832e-36
591	Zm00001d052609	51.4051	-2.08578	0.541123	-3.85453	0.00011595	0.000561555
592	Zm00001d004918	142.706	-2.08547	0.446818	-4.66738	3.05069e-06	2.04205e-05
593	Zm00001d021738	123.813	-2.08422	0.41723	-4.99537	5.87221e-07	4.45662e-06
594	Zm00001d039040	600.451	-2.08169	0.290619	-7.16295	7.89612e-13	1.265e-11
595	Zm00001d015202	39.5771	-2.0804	0.603765	-3.44571	0.000569556	0.00231051
596	Zm00001d003102	249.859	-2.07744	0.271353	-7.65586	1.92018e-14	3.51853e-13
597	Zm00001d044951	247.73	-2.07602	0.316325	-6.56292	5.27627e-11	7.06982e-10
598	Zm00001d052962	887.763	-2.07445	0.333503	-6.22018	4.96598e-10	5.96049e-09
599	Zm00001d032401	75.2409	-2.07378	0.523482	-3.9615	7.44793e-05	0.000377219
600	Zm00001d035400	78.9849	-2.07175	0.651065	-3.18209	0.00146216	0.00527584
601	Zm00001d012972	758.477	-2.07108	0.225596	-9.18047	4.29211e-20	1.22474e-18
602	Zm00001d049218	356.735	-2.06991	0.227731	-9.08927	9.97041e-20	2.78545e-18
603	Zm00001d043741	141.411	-2.0697	0.442339	-4.67899	2.88286e-06	1.93943e-05
604	Zm00001d003938	83.8544	-2.06853	0.68983	-2.99861	0.00271215	0.00899623
605	Zm00001d003669	1001.69	-2.06834	0.185187	-11.1689	5.78922e-29	2.71901e-27
606	Zm00001d000617	51.1813	-2.06446	0.568764	-3.62973	0.000283716	0.00124525
607	Zm00001d003459	202.37	-2.06327	0.355522	-5.80349	6.49482e-09	6.70925e-08
608	Zm00001d048663	1009.15	-2.0617	0.220207	-9.36257	7.7818e-21	2.36636e-19
609	Zm00001d025649	57.2653	-2.06134	0.535248	-3.85119	0.000117544	0.000568545
610	Zm00001d010759	586.426	-2.06043	0.256198	-8.04233	8.81483e-16	1.79986e-14
611	Zm00001d001905	324.079	-2.0581	0.262377	-7.84406	4.36208e-15	8.45759e-14
612	Zm00001d021692	868.665	-2.05594	0.314741	-6.53216	6.48284e-11	8.59516e-10
613	Zm00001d006815	208.041	-2.05221	0.371399	-5.52561	3.2834e-08	3.07404e-07
614	Zm00001d030270	157.902	-2.04854	0.43413	-4.71874	2.37314e-06	1.62055e-05
615	Zm00001d025581	832.982	-2.0482	0.168508	-12.1549	5.4032e-34	3.17543e-32
616	Zm00001d012323	174.095	-2.04734	0.305827	-6.69443	2.16517e-11	3.0133e-10
617	Zm00001d046377	885.334	-2.04604	0.234651	-8.71951	2.79416e-18	7.01168e-17
618	Zm00001d020264	1596.42	-2.04538	0.209993	-9.7402	2.03144e-22	6.81706e-21
619	Zm00001d031068	512.956	-2.04508	0.253394	-8.07075	6.98649e-16	1.43819e-14
620	Zm00001d012131	1540.25	-2.04484	0.193983	-10.5413	5.57037e-26	2.27682e-24
621	Zm00001d011879	541.644	-2.04314	0.273936	-7.45845	8.75443e-14	1.52882e-12
622	Zm00001d038764	116.118	-2.04112	0.635859	-3.21002	0.00132724	0.00483748
623	Zm00001d013536	302.782	-2.03935	0.298178	-6.83936	7.9549e-12	1.1665e-10
624	Zm00001d041700	1595.34	-2.03916	0.174608	-11.6785	1.64142e-31	8.63936e-30
625	Zm00001d029777	6423.96	-2.03722	0.187095	-10.8887	1.30491e-27	5.77034e-26
626	Zm00001d047847	7453.18	-2.03477	0.561041	-3.62678	0.000286981	0.00125849
627	Zm00001d027509	31.8283	-2.03389	0.673064	-3.02184	0.00251246	0.00840513
628	Zm00001d051451	62.4704	-2.03329	0.77725	-2.616	0.00889664	0.0250304
629	Zm00001d005736	3313.6	-2.0323	0.158171	-12.8488	8.74042e-38	5.88357e-36
630	Zm00001d045785	532.749	-2.03129	0.306016	-6.63783	3.18333e-11	4.345e-10
631	Zm00001d042511	400.234	-2.03127	0.214108	-9.48713	2.37478e-21	7.53453e-20
632	Zm00001d042064	3347.22	-2.02753	0.161465	-12.5571	3.63558e-36	2.32975e-34
633	Zm00001d045123	217.536	-2.02633	0.382136	-5.30264	1.14138e-07	9.78544e-07
634	Zm00001d007793	116.968	-2.02549	0.34579	-5.85757	4.69691e-09	4.96503e-08
635	Zm00001d008261	340.128	-2.0242	0.264284	-7.65921	1.87084e-14	3.43088e-13
636	Zm00001d009881	83.4651	-2.02355	0.520814	-3.88535	0.000102181	0.00050162
637	Zm00001d051829	188.907	-2.02243	0.384853	-5.25506	1.47972e-07	1.24186e-06
638	Zm00001d008581	1120.86	-2.02178	0.179373	-11.2714	1.81715e-29	8.71504e-28
639	Zm00001d005901	230.538	-2.01992	0.357813	-5.64519	1.64995e-08	1.61611e-07
640	Zm00001d003757	3967.16	-2.01937	0.228143	-8.85134	8.64721e-19	2.24699e-17
641	Zm00001d011193	933.524	-2.01722	0.185677	-10.8641	1.70907e-27	7.48461e-26
642	Zm00001d033136	1725.16	-2.01645	0.23534	-8.56825	1.05069e-17	2.51689e-16
643	Zm00001d017609	1644.6	-2.01638	0.181886	-11.0859	1.46806e-28	6.7965e-27
644	Zm00001d039991	4449.94	-2.01497	0.151869	-13.2678	3.56016e-40	2.63069e-38
645	Zm00001d052713	85.2667	-2.0128	0.454999	-4.42374	9.70072e-06	5.86204e-05
646	Zm00001d040461	63.2319	-2.01249	0.619458	-3.24879	0.00115899	0.00429461
647	Zm00001d016741	700.705	-2.01035	0.21035	-9.55719	1.20993e-21	3.92105e-20
648	Zm00001d009178	37.8984	-2.00698	0.600179	-3.34397	0.000825877	0.00320038
649	Zm00001d021688	251.524	-2.00618	0.461427	-4.34777	1.37528e-05	8.08246e-05
650	Zm00001d046121	481.979	-2.00604	0.289533	-6.92855	4.25187e-12	6.3919e-11
651	Zm00001d003310	1216.71	-2.00577	0.176593	-11.3582	6.75507e-30	3.33128e-28
652	Zm00001d025964	199.357	-2.00335	0.32142	-6.23279	4.58186e-10	5.51989e-09
653	Zm00001d013222	2833.79	-2.0029	0.140938	-14.2113	7.80174e-46	6.99535e-44
654	Zm00001d028016	92.7922	-2.0023	0.432528	-4.62929	3.66928e-06	2.42251e-05
655	Zm00001d028021	124.392	-2.00189	0.38045	-5.26189	1.42583e-07	1.20018e-06
656	Zm00001d019335	2453.45	-2.00176	0.203378	-9.8426	7.37789e-23	2.55523e-21
657	Zm00001d013276	74.334	-1.99928	0.516726	-3.86913	0.000109226	0.000531258
658	Zm00001d047204	5493.79	-1.99855	0.149229	-13.3925	6.68476e-41	5.14047e-39
659	Zm00001d019887	202.972	-1.99668	0.376469	-5.30371	1.13474e-07	9.73956e-07
660	Zm00001d026636	83.7337	-1.99533	0.448691	-4.44701	8.70725e-06	5.31407e-05
661	Zm00001d016163	71.2436	-1.99417	0.475731	-4.1918	2.76744e-05	0.000152934
662	Zm00001d045036	796.191	-1.99359	0.717636	-2.77799	0.00546962	0.0165195
663	Zm00001d031173	534.435	-1.98935	0.241229	-8.24675	1.62766e-16	3.53334e-15
664	Zm00001d047632	610.371	-1.98776	0.177667	-11.1881	4.66341e-29	2.19937e-27
665	Zm00001d002195	89.1836	-1.98735	0.420247	-4.72901	2.25616e-06	1.54719e-05
666	Zm00001d017591	127.76	-1.98573	0.590902	-3.36052	0.000777971	0.00304228
667	Zm00001d025373	108.468	-1.98466	0.397631	-4.99122	5.99993e-07	4.53846e-06
668	Zm00001d019555	313.442	-1.98445	0.250256	-7.92966	2.19748e-15	4.34233e-14
669	Zm00001d008582	49.8793	-1.98387	0.665207	-2.98233	0.00286063	0.00941987
670	Zm00001d012398	1842.62	-1.98171	0.210904	-9.39626	5.65363e-21	1.7334e-19
671	Zm00001d017152	129.84	-1.98122	0.576347	-3.43755	0.000587006	0.00237536
672	Zm00001d048957	818.744	-1.97772	0.201946	-9.79332	1.20284e-22	4.10941e-21
673	Zm00001d032866	320.976	-1.97682	0.283542	-6.97187	3.12756e-12	4.76166e-11
674	Zm00001d026599	742.14	-1.97642	0.204498	-9.66471	4.25811e-22	1.3979e-20
675	Zm00001d020306	518.186	-1.97465	0.211327	-9.34402	9.2745e-21	2.80149e-19
676	Zm00001d016934	144.762	-1.97445	0.32009	-6.16842	6.89748e-10	8.09883e-09
677	Zm00001d017290	416.043	-1.97053	0.344883	-5.71361	1.10606e-08	1.10924e-07
678	Zm00001d034772	5057.2	-1.96967	0.20578	-9.57172	1.05142e-21	3.4171e-20
679	Zm00001d042210	451.708	-1.96928	0.216665	-9.08908	9.98808e-20	2.78696e-18
680	Zm00001d018983	473.615	-1.96902	0.222545	-8.8477	8.93405e-19	2.31622e-17
681	Zm00001d035920	967.794	-1.96875	0.168408	-11.6904	1.42757e-31	7.53124e-30
682	Zm00001d011097	114.751	-1.96796	0.424279	-4.63837	3.5117e-06	2.32864e-05
683	Zm00001d053409	197.204	-1.96645	0.411583	-4.77779	1.77236e-06	1.23635e-05
684	Zm00001d052152	160.751	-1.9658	0.503959	-3.9007	9.59143e-05	0.000474551
685	Zm00001d040028	21005.2	-1.96573	0.194209	-10.1217	4.42602e-24	1.65957e-22
686	Zm00001d033402	183.915	-1.96535	0.290554	-6.76413	1.34109e-11	1.91578e-10
687	Zm00001d053652	205.486	-1.96259	0.307632	-6.37967	1.77474e-10	2.24916e-09
688	Zm00001d023559	186.803	-1.96236	0.359955	-5.45169	4.98936e-08	4.52735e-07
689	Zm00001d015091	281.18	-1.95994	0.801772	-2.44451	0.014505	0.0377606
690	Zm00001d008716	1423.93	-1.95975	0.168324	-11.6427	2.49952e-31	1.30196e-29
691	Zm00001d012418	236.294	-1.95943	0.278149	-7.04452	1.86104e-12	2.90156e-11
692	Zm00001d029721	190.598	-1.95813	0.364294	-5.37513	7.65267e-08	6.74702e-07
693	Zm00001d003493	638.279	-1.95676	0.243901	-8.02277	1.03386e-15	2.09403e-14
694	Zm00001d040125	521.012	-1.95626	0.218833	-8.93951	3.90901e-19	1.0408e-17
695	Zm00001d010300	246.191	-1.95618	0.258696	-7.56167	3.97929e-14	7.13035e-13
696	Zm00001d020852	282.524	-1.95543	0.263393	-7.42401	1.13626e-13	1.96465e-12
697	Zm00001d041553	23932.6	-1.95378	0.164779	-11.857	1.97921e-32	1.09508e-30
698	Zm00001d018660	125.541	-1.95293	0.395842	-4.93362	8.07196e-07	5.96457e-06
699	Zm00001d006521	85.4344	-1.95135	0.410839	-4.74968	2.03741e-06	1.40525e-05
700	Zm00001d034457	639.576	-1.95076	0.195786	-9.96371	2.19705e-23	7.83466e-22
701	Zm00001d036246	73.8481	-1.94873	0.500436	-3.89406	9.85812e-05	0.000486367
702	Zm00001d007815	5880.75	-1.94859	0.162534	-11.9888	4.06698e-33	2.31227e-31
703	Zm00001d015129	605.562	-1.9485	0.223697	-8.71045	3.02665e-18	7.56997e-17
704	Zm00001d026263	6922.46	-1.94802	0.137456	-14.172	1.36638e-45	1.21554e-43
705	Zm00001d033710	114.637	-1.94757	0.417152	-4.66872	3.03083e-06	2.02935e-05
706	Zm00001d041824	182.034	-1.94683	0.314852	-6.18333	6.27636e-10	7.41173e-09
707	Zm00001d050389	80.5517	-1.94548	0.453963	-4.28555	1.82292e-05	0.000104558
708	Zm00001d007437	59.0877	-1.94517	0.529525	-3.67343	0.00023932	0.00106869
709	Zm00001d009589	245.851	-1.94481	0.335842	-5.79083	7.00374e-09	7.20217e-08
710	Zm00001d053322	51.4179	-1.94453	0.515817	-3.76981	0.00016337	0.00076239
711	Zm00001d012290	334.265	-1.94309	0.234559	-8.284	1.19101e-16	2.61549e-15
712	Zm00001d007213	2522.99	-1.94229	0.170451	-11.395	4.42684e-30	2.20225e-28
713	Zm00001d011745	1873.29	-1.94153	0.221618	-8.76068	1.94083e-18	4.9248e-17
714	Zm00001d006016	1809.05	-1.9411	0.785296	-2.4718	0.0134433	0.0354525
715	Zm00001d050133	2644.38	-1.94053	0.249732	-7.77046	7.82034e-15	1.48084e-13
716	Zm00001d013703	2631.63	-1.94052	0.156495	-12.3999	2.61688e-35	1.60011e-33
717	Zm00001d024733	102.712	-1.93808	0.470455	-4.11959	3.79544e-05	0.000203834
718	Zm00001d040644	287.199	-1.93794	0.248184	-7.80848	5.78812e-15	1.10711e-13
719	Zm00001d048311	62.4549	-1.93738	0.551896	-3.51041	0.000447414	0.00186848
720	Zm00001d009540	42.5806	-1.93701	0.580419	-3.33727	0.000846065	0.003268
721	Zm00001d035184	516.07	-1.93701	0.209551	-9.24363	2.38274e-20	6.95655e-19
722	Zm00001d027456	91.8657	-1.93409	0.465383	-4.15591	3.23993e-05	0.000176383
723	Zm00001d013463	327.647	-1.93333	0.392487	-4.92585	8.39943e-07	6.19243e-06
724	Zm00001d018717	325.423	-1.93191	0.224188	-8.61735	6.85199e-18	1.66066e-16
725	Zm00001d034613	138.329	-1.93161	0.443649	-4.35392	1.33727e-05	7.88972e-05
726	Zm00001d053416	741.437	-1.93152	0.217358	-8.88633	6.31597e-19	1.65639e-17
727	Zm00001d038017	357.507	-1.93055	0.285793	-6.75508	1.42758e-11	2.03421e-10
728	Zm00001d042935	152.798	-1.93016	0.403782	-4.7802	1.75122e-06	1.22273e-05
729	Zm00001d045478	63960.6	-1.9301	0.151853	-12.7103	5.18477e-37	3.40917e-35
730	Zm00001d021025	246.216	-1.92776	0.316423	-6.09235	1.11263e-09	1.27862e-08
731	Zm00001d021901	135.414	-1.92533	0.44161	-4.35981	1.30177e-05	7.69426e-05
732	Zm00001d051499	53.3523	-1.9193	0.525927	-3.64937	0.000262885	0.00116317
733	Zm00001d014486	4005.48	-1.91613	0.161955	-11.8313	2.69061e-32	1.47431e-30
734	Zm00001d032206	132.874	-1.916	0.410386	-4.66877	3.03015e-06	2.02935e-05
735	Zm00001d052518	2964.08	-1.91407	0.177455	-10.7863	3.99724e-27	1.72719e-25
736	Zm00001d006368	974.124	-1.90963	0.19289	-9.90009	4.15903e-23	1.46275e-21
737	Zm00001d042147	88.6718	-1.9088	0.461286	-4.138	3.5034e-05	0.000189578
738	Zm00001d040426	200.729	-1.90843	0.299172	-6.37901	1.78231e-10	2.25497e-09
739	Zm00001d011660	63.8544	-1.90607	0.47212	-4.03726	5.40803e-05	0.000281766
740	Zm00001d030037	178.857	-1.90519	0.313126	-6.08443	1.16905e-09	1.33803e-08
741	Zm00001d013199	565.499	-1.90434	0.260495	-7.31047	2.66201e-13	4.48979e-12
742	Zm00001d028670	93.5413	-1.90421	0.510799	-3.7279	0.000193081	0.000887189
743	Zm00001d037684	372.14	-1.90239	0.302229	-6.29453	3.08327e-10	3.77464e-09
744	Zm00001d002262	426.114	-1.90226	0.214947	-8.84992	8.75833e-19	2.27326e-17
745	Zm00001d052613	136.476	-1.90219	0.33576	-5.66532	1.46748e-08	1.44801e-07
746	Zm00001d016948	458.701	-1.90123	0.260151	-7.30817	2.70808e-13	4.56071e-12
747	Zm00001d025524	92.9872	-1.89806	0.547064	-3.46954	0.000521352	0.0021352
748	Zm00001d031619	161.266	-1.89778	0.345967	-5.48543	4.12464e-08	3.7943e-07
749	Zm00001d016185	380.839	-1.89519	0.312743	-6.0599	1.36204e-09	1.54335e-08
750	Zm00001d017782	73.42	-1.89371	0.487863	-3.88163	0.000103757	0.000508365
751	Zm00001d028007	1089.17	-1.89309	0.262171	-7.22081	5.16793e-13	8.44021e-12
752	Zm00001d005785	2135.84	-1.89291	0.230914	-8.19749	2.45455e-16	5.21851e-15
753	Zm00001d031204	169.292	-1.89268	0.444646	-4.25661	2.07553e-05	0.000117915
754	Zm00001d023604	1649.45	-1.89099	0.189692	-9.96874	2.08852e-23	7.4847e-22
755	Zm00001d002374	87.1127	-1.89084	0.681886	-2.77295	0.00555503	0.0167307
756	Zm00001d031086	76.6438	-1.89027	0.412319	-4.58447	4.55133e-06	2.95245e-05
757	Zm00001d039926	48.1547	-1.88828	0.561422	-3.36339	0.000769913	0.00301441
758	Zm00001d011644	172.345	-1.88758	0.302164	-6.24687	4.18751e-10	5.06633e-09
759	Zm00001d047895	66.3985	-1.88675	0.539413	-3.49779	0.000469128	0.00194698
760	Zm00001d021278	929.359	-1.8862	0.163885	-11.5093	1.18427e-30	6.02358e-29
761	Zm00001d002802	170.975	-1.88491	0.48128	-3.91645	8.98622e-05	0.000447535
762	Zm00001d034529	692.359	-1.88405	0.202389	-9.3091	1.28923e-20	3.86342e-19
763	Zm00001d006590	1047.02	-1.88365	0.179697	-10.4823	1.04138e-25	4.21099e-24
764	Zm00001d024005	65.5879	-1.88364	0.453173	-4.15656	3.23077e-05	0.000176093
765	Zm00001d005081	166.31	-1.88286	0.331234	-5.68438	1.31285e-08	1.30109e-07
766	Zm00001d018496	3134.47	-1.88218	0.174148	-10.8079	3.15789e-27	1.37763e-25
767	Zm00001d034506	1537.7	-1.88075	0.218375	-8.6125	7.14812e-18	1.72689e-16
768	Zm00001d021876	91.3216	-1.88045	0.443429	-4.24071	2.22818e-05	0.000125862
769	Zm00001d051453	786.708	-1.87994	0.208095	-9.03403	1.65462e-19	4.51143e-18
770	Zm00001d036676	326.2	-1.87866	0.292096	-6.43165	1.26226e-10	1.6251e-09
771	Zm00001d010862	3270.53	-1.87404	0.13663	-13.7162	8.12132e-43	6.62705e-41
772	Zm00001d026056	615.202	-1.87403	0.209156	-8.95994	3.24853e-19	8.73139e-18
773	Zm00001d038149	4412.75	-1.87315	0.134362	-13.941	3.56697e-44	3.04198e-42
774	Zm00001d012979	4529.38	-1.87278	0.150059	-12.4803	9.56812e-36	5.96299e-34
775	Zm00001d013113	426.303	-1.87227	0.203414	-9.20427	3.44015e-20	9.89098e-19
776	Zm00001d006180	108.544	-1.87154	0.462419	-4.04728	5.18155e-05	0.000270464
777	Zm00001d026026	1321.15	-1.87126	0.202531	-9.23937	2.47958e-20	7.2207e-19
778	Zm00001d009694	68.2041	-1.86808	0.599318	-3.11701	0.00182698	0.00639978
779	Zm00001d044629	103.328	-1.86788	0.507342	-3.68169	0.00023169	0.00103933
780	Zm00001d001839	141.406	-1.86548	0.343561	-5.42982	5.64105e-08	5.07807e-07
781	Zm00001d011610	1107.06	-1.86384	0.223743	-8.33023	8.06829e-17	1.81397e-15
782	Zm00001d048601	46.3435	-1.85908	0.730193	-2.54601	0.0108962	0.0296806
783	Zm00001d041772	410.674	-1.85839	0.227024	-8.18587	2.70342e-16	5.72615e-15
784	Zm00001d049121	180.609	-1.85549	0.353538	-5.24835	1.53466e-07	1.28512e-06
785	Zm00001d044604	851.536	-1.85514	0.249791	-7.42677	1.11281e-13	1.926e-12
786	Zm00001d040793	347.106	-1.8518	0.239347	-7.73686	1.01901e-14	1.901e-13
787	Zm00001d040726	792.265	-1.85156	0.202623	-9.13795	6.36491e-20	1.79364e-18
788	Zm00001d017666	189.086	-1.85145	0.311846	-5.93707	2.90161e-09	3.14792e-08
789	Zm00001d029820	835.738	-1.8503	0.239829	-7.71509	1.20901e-14	2.24807e-13
790	Zm00001d031985	80.7327	-1.85015	0.528381	-3.50156	0.000462549	0.00192425
791	Zm00001d023133	606.251	-1.84942	0.736445	-2.51128	0.0120293	0.0322789
792	Zm00001d017976	120.247	-1.84764	0.447532	-4.12851	3.65128e-05	0.000196697
793	Zm00001d043787	801.82	-1.84514	0.199381	-9.25439	2.15467e-20	6.30691e-19
794	Zm00001d044030	44.015	-1.84501	0.569444	-3.24003	0.00119519	0.00441147
795	Zm00001d024160	107.969	-1.84195	0.397361	-4.63547	3.56128e-06	2.35877e-05
796	Zm00001d040589	216.847	-1.84179	0.423089	-4.35319	1.34169e-05	7.90962e-05
797	Zm00001d033564	51.1249	-1.83999	0.59983	-3.06752	0.00215845	0.00738306
798	Zm00001d043044	38.2742	-1.83597	0.598155	-3.06939	0.00214493	0.00734236
799	Zm00001d051789	294.018	-1.83163	0.238662	-7.67459	1.6595e-14	3.05318e-13
800	Zm00001d025011	2044.41	-1.83069	0.187484	-9.76451	1.59882e-22	5.40526e-21
801	Zm00001d028304	115.751	-1.83015	0.421222	-4.34486	1.39365e-05	8.17135e-05
802	Zm00001d044181	176.02	-1.8278	0.355433	-5.14245	2.71174e-07	2.18528e-06
803	Zm00001d001862	2971.76	-1.82706	0.600844	-3.04082	0.00235935	0.00797523
804	Zm00001d034189	62.0659	-1.82587	0.482339	-3.78545	0.000153432	0.000722415
805	Zm00001d038553	122.154	-1.81949	0.436031	-4.17285	3.00807e-05	0.000164946
806	Zm00001d049097	918.427	-1.81794	0.274205	-6.62984	3.36051e-11	4.57582e-10
807	Zm00001d046465	180.542	-1.81722	0.333845	-5.44331	5.22993e-08	4.73427e-07
808	Zm00001d005322	45.815	-1.81712	0.613845	-2.96022	0.00307415	0.0100312
809	Zm00001d007091	394.241	-1.81656	0.207706	-8.74586	2.21319e-18	5.58468e-17
810	Zm00001d033872	732.747	-1.81309	0.721088	-2.51437	0.0119244	0.0320503
811	Zm00001d008772	56.7501	-1.81217	0.495228	-3.65927	0.000252936	0.00112353
812	Zm00001d039222	314.522	-1.81185	0.276573	-6.55106	5.71293e-11	7.63687e-10
813	Zm00001d005764	104.371	-1.81033	0.557544	-3.24698	0.00116636	0.0043156
814	Zm00001d008398	447.604	-1.81028	0.217875	-8.30878	9.66872e-17	2.14404e-15
815	Zm00001d020976	929.855	-1.81022	0.699954	-2.58619	0.00970421	0.0269054
816	Zm00001d043257	326.224	-1.80935	0.339915	-5.32294	1.02105e-07	8.81372e-07
817	Zm00001d009071	113.184	-1.80772	0.454499	-3.9774	6.96729e-05	0.000354538
818	Zm00001d021454	58.7914	-1.80733	0.580587	-3.11293	0.00185242	0.0064779
819	Zm00001d033867	628.476	-1.80436	0.190486	-9.47243	2.73411e-21	8.6504e-20
820	Zm00001d032306	162.031	-1.80234	0.42487	-4.24209	2.21447e-05	0.000125119
821	Zm00001d041793	726.808	-1.80204	0.187425	-9.61472	6.93005e-22	2.26852e-20
822	Zm00001d039513	1797.77	-1.79916	0.177959	-10.11	4.98959e-24	1.86166e-22
823	Zm00001d017686	2100.12	-1.7979	0.161583	-11.1268	9.29132e-29	4.328e-27
824	Zm00001d029207	36.433	-1.79718	0.66883	-2.68705	0.00720863	0.0209785
825	Zm00001d025993	385.128	-1.79693	0.237554	-7.56428	3.9001e-14	6.99398e-13
826	Zm00001d053004	154.442	-1.79633	0.383122	-4.68866	2.75006e-06	1.85836e-05
827	Zm00001d034461	108.426	-1.79627	0.539534	-3.3293	0.000870637	0.00335435
828	Zm00001d025517	1795.43	-1.79512	0.165165	-10.8687	1.62571e-27	7.14713e-26
829	Zm00001d016070	10129.3	-1.79389	0.199815	-8.97774	2.76396e-19	7.44662e-18
830	Zm00001d022243	6491.18	-1.79371	0.16038	-11.1841	4.87761e-29	2.29562e-27
831	Zm00001d016008	626.446	-1.79324	0.245999	-7.2896	3.10886e-13	5.20091e-12
832	Zm00001d020707	84.4637	-1.79323	0.413573	-4.33594	1.4514e-05	8.49238e-05
833	Zm00001d013489	1345.93	-1.79166	0.267259	-6.70385	2.02992e-11	2.83727e-10
834	Zm00001d020871	121.794	-1.79149	0.329176	-5.44235	5.25816e-08	4.75414e-07
835	Zm00001d038990	136.817	-1.79	0.364658	-4.90873	9.16703e-07	6.7082e-06
836	Zm00001d007790	71.7803	-1.78935	0.465429	-3.84453	0.000120786	0.000583358
837	Zm00001d045361	78.8632	-1.78931	0.711291	-2.51558	0.0118838	0.0319639
838	Zm00001d009116	73.6733	-1.78777	0.542903	-3.29298	0.000991313	0.00374925
839	Zm00001d042411	61.947	-1.78523	0.488983	-3.65091	0.000261315	0.00115689
840	Zm00001d019421	150.303	-1.7833	0.34867	-5.11458	3.14434e-07	2.50229e-06
841	Zm00001d018796	109.671	-1.77977	0.496878	-3.5819	0.000341108	0.00146915
842	Zm00001d011500	4030.73	-1.7776	0.138878	-12.7997	1.64517e-37	1.10091e-35
843	Zm00001d006307	1332.37	-1.77642	0.186014	-9.54994	1.29776e-21	4.18177e-20
844	Zm00001d039974	484.778	-1.77534	0.221299	-8.02235	1.03739e-15	2.0993e-14
845	Zm00001d014730	284.665	-1.7733	0.270753	-6.54953	5.77175e-11	7.70642e-10
846	Zm00001d008001	35335.8	-1.77326	0.222062	-7.9854	1.40068e-15	2.80444e-14
847	Zm00001d014623	181.328	-1.77207	0.35527	-4.98796	6.10211e-07	4.60653e-06
848	Zm00001d018838	206.809	-1.77015	0.38226	-4.63075	3.64337e-06	2.408e-05
849	Zm00001d016570	786.075	-1.76952	0.218667	-8.09232	5.85379e-16	1.21383e-14
850	Zm00001d043418	19058	-1.76874	0.123648	-14.3046	2.04785e-46	1.88079e-44
851	Zm00001d019698	94.6566	-1.76858	0.429875	-4.11418	3.88562e-05	0.000208135
852	Zm00001d008620	113753	-1.7684	0.146524	-12.069	1.53908e-33	8.83902e-32
853	Zm00001d033011	71.9456	-1.76824	0.467525	-3.78213	0.000155495	0.000730312
854	Zm00001d009619	459.989	-1.76596	0.411874	-4.28761	1.80602e-05	0.000103668
855	Zm00001d024854	52.8187	-1.76375	0.519275	-3.39656	0.000682379	0.00271004
856	Zm00001d035197	192.265	-1.76347	0.329692	-5.34886	8.85123e-08	7.71676e-07
857	Zm00001d015182	88.3454	-1.76255	0.443385	-3.97521	7.03179e-05	0.000357579
858	Zm00001d026379	352.539	-1.7576	0.246523	-7.12953	1.00709e-12	1.59873e-11
859	Zm00001d031766	1373.99	-1.7567	0.181064	-9.7021	2.95348e-22	9.824e-21
860	Zm00001d013234	109.175	-1.75606	0.387191	-4.53537	5.75018e-06	3.65182e-05
861	Zm00001d038178	114.408	-1.75594	0.612037	-2.86901	0.00411758	0.012937
862	Zm00001d021703	1026.31	-1.75578	0.187683	-9.35504	8.35678e-21	2.5378e-19
863	Zm00001d032901	185.188	-1.75323	0.279718	-6.26785	3.66072e-10	4.45034e-09
864	Zm00001d005454	113395	-1.74916	0.161393	-10.8379	2.27577e-27	9.94716e-26
865	Zm00001d045124	1125.16	-1.74829	0.201215	-8.68866	3.66736e-18	9.1422e-17
866	Zm00001d012301	661.644	-1.74696	0.180287	-9.68988	3.3291e-22	1.10249e-20
867	Zm00001d044921	1460.26	-1.74636	0.246801	-7.07599	1.48385e-12	2.32788e-11
868	Zm00001d017831	758.826	-1.74574	0.179478	-9.72673	2.31921e-22	7.75978e-21
869	Zm00001d028746	273.062	-1.74413	0.259322	-6.72573	1.74714e-11	2.45715e-10
870	Zm00001d043045	164.659	-1.74336	0.447627	-3.89467	9.8334e-05	0.000485253
871	Zm00001d027353	1122.28	-1.74258	0.164589	-10.5874	3.40775e-26	1.41325e-24
872	Zm00001d013126	2658.07	-1.74252	0.162894	-10.6972	1.04882e-26	4.4389e-25
873	Zm00001d015339	64.1494	-1.74244	0.717367	-2.42894	0.015143	0.0391295
874	Zm00001d043062	179.892	-1.74153	0.515014	-3.38152	0.000720858	0.00284196
875	Zm00001d038445	501.16	-1.74125	0.241941	-7.19699	6.15582e-13	9.9675e-12
876	Zm00001d022516	65.024	-1.74106	0.569444	-3.05748	0.00223206	0.00760275
877	Zm00001d009034	123.173	-1.74076	0.460637	-3.77902	0.000157444	0.000738547
878	Zm00001d009741	74.3011	-1.74037	0.54238	-3.20876	0.00133309	0.00485723
879	Zm00001d013937	2960.9	-1.73973	0.191135	-9.1021	8.86004e-20	2.48136e-18
880	Zm00001d039230	87.482	-1.73927	0.500555	-3.47469	0.000511449	0.00210017
881	Zm00001d042755	281.055	-1.73877	0.263402	-6.60121	4.07828e-11	5.50034e-10
882	Zm00001d027137	435.606	-1.73576	0.302775	-5.73285	9.87597e-09	9.98379e-08
883	Zm00001d034184	203.516	-1.73531	0.339283	-5.11463	3.14354e-07	2.50229e-06
884	Zm00001d043701	187.126	-1.73524	0.513	-3.38253	0.000718203	0.00283203
885	Zm00001d017682	138.527	-1.73356	0.338304	-5.12427	2.98689e-07	2.38836e-06
886	Zm00001d017642	162.562	-1.73355	0.342817	-5.05679	4.26364e-07	3.30669e-06
887	Zm00001d047025	117.469	-1.72922	0.419986	-4.11734	3.83266e-05	0.000205638
888	Zm00001d029028	4489.57	-1.7249	0.217416	-7.93364	2.12812e-15	4.21261e-14
889	Zm00001d038874	334.124	-1.72447	0.254237	-6.78293	1.17766e-11	1.68977e-10
890	Zm00001d047369	181.017	-1.72095	0.313892	-5.48261	4.19095e-08	3.8475e-07
891	Zm00001d027599	103.128	-1.71738	0.478463	-3.58937	0.00033148	0.00143176
892	Zm00001d039697	131.961	-1.71481	0.447833	-3.82914	0.000128594	0.000615565
893	Zm00001d028835	536.956	-1.71472	0.1976	-8.67776	4.03641e-18	1.00401e-16
894	Zm00001d003390	633.96	-1.71422	0.233944	-7.32752	2.34457e-13	3.97212e-12
895	Zm00001d032459	264.681	-1.71304	0.275684	-6.21375	5.17336e-10	6.18975e-09
896	Zm00001d043912	591.993	-1.71182	0.197685	-8.65931	4.7464e-18	1.16908e-16
897	Zm00001d014650	147.819	-1.71163	0.326314	-5.24533	1.56001e-07	1.30489e-06
898	Zm00001d039326	57.8764	-1.70964	0.507486	-3.36885	0.000754838	0.00295998
899	Zm00001d037198	209.8	-1.70845	0.26442	-6.46112	1.03932e-10	1.35345e-09
900	Zm00001d013346	2229.63	-1.7083	0.144063	-11.858	1.95704e-32	1.08546e-30
901	Zm00001d016477	561.174	-1.70771	0.201485	-8.47566	2.33756e-17	5.4894e-16
902	Zm00001d028930	56.8812	-1.70737	0.552326	-3.09124	0.00199321	0.00689373
903	Zm00001d029955	82.951	-1.70663	0.549797	-3.1041	0.00190859	0.00664768
904	Zm00001d037677	88.7338	-1.70644	0.44477	-3.83668	0.000124708	0.00059949
905	Zm00001d002695	123.227	-1.70568	0.352666	-4.83654	1.32121e-06	9.41024e-06
906	Zm00001d015434	330.98	-1.70417	0.332014	-5.13284	2.85409e-07	2.29186e-06
907	Zm00001d021344	278.788	-1.70109	0.36105	-4.7115	2.45903e-06	1.67517e-05
908	Zm00001d045295	250.911	-1.70013	0.266972	-6.36817	1.91294e-10	2.40816e-09
909	Zm00001d039295	43.3725	-1.69811	0.568461	-2.98721	0.0028154	0.00929248
910	Zm00001d015292	45.4682	-1.69749	0.666471	-2.54698	0.0108659	0.0296123
911	Zm00001d021844	92.2321	-1.69697	0.382142	-4.44067	8.96801e-06	5.46292e-05
912	Zm00001d043735	144.667	-1.69612	0.366051	-4.63356	3.59423e-06	2.37851e-05
913	Zm00001d014882	5193.4	-1.69408	0.144386	-11.733	8.63832e-32	4.6217e-30
914	Zm00001d037218	208.103	-1.69376	0.287664	-5.88797	3.90964e-09	4.17955e-08
915	Zm00001d019669	156.27	-1.69258	0.316587	-5.34633	8.97563e-08	7.8132e-07
916	Zm00001d038619	125.2	-1.69246	0.359729	-4.70482	2.54091e-06	1.72887e-05
917	Zm00001d048686	755.755	-1.69129	0.206524	-8.18935	2.62638e-16	5.56817e-15
918	Zm00001d022308	2782.04	-1.68908	0.150466	-11.2257	3.05076e-29	1.45392e-27
919	Zm00001d029102	3308.98	-1.6884	0.219382	-7.69614	1.4024e-14	2.5949e-13
920	Zm00001d017592	307.651	-1.68805	0.450535	-3.74677	0.000179125	0.000829955
921	Zm00001d030253	389.033	-1.6879	0.293607	-5.74884	8.98554e-09	9.12431e-08
922	Zm00001d045644	64.0944	-1.68787	0.502326	-3.36011	0.000779108	0.00304568
923	Zm00001d026427	495.067	-1.6866	0.217845	-7.74221	9.77046e-15	1.83048e-13
924	Zm00001d036900	38.3708	-1.68594	0.665363	-2.53387	0.0112811	0.0305494
925	Zm00001d005173	2115.7	-1.68493	0.207369	-8.12529	4.46282e-16	9.35666e-15
926	Zm00001d013035	1372.73	-1.6825	0.150909	-11.1491	7.22947e-29	3.38145e-27
927	Zm00001d048202	825.69	-1.67948	0.184954	-9.08054	1.08042e-19	2.99625e-18
928	Zm00001d002642	1661.98	-1.67909	0.189954	-8.83942	9.62209e-19	2.49175e-17
929	Zm00001d009964	149.983	-1.67859	0.342388	-4.90258	9.45882e-07	6.90612e-06
930	Zm00001d006262	191.795	-1.67731	0.291294	-5.75814	8.50433e-09	8.6745e-08
931	Zm00001d044020	245.421	-1.67717	0.312695	-5.3636	8.15785e-08	7.17012e-07
932	Zm00001d036234	428.621	-1.67643	0.254709	-6.58173	4.65005e-11	6.2529e-10
933	Zm00001d045384	1582.63	-1.676	0.216521	-7.7406	9.89468e-15	1.85046e-13
934	Zm00001d003279	299.565	-1.67379	0.377952	-4.42857	9.48598e-06	5.74145e-05
935	Zm00001d020134	68.3331	-1.67069	0.495216	-3.37366	0.00074176	0.00291223
936	Zm00001d046314	44.0518	-1.6706	0.689589	-2.4226	0.01541	0.0397019
937	Zm00001d027757	750.726	-1.66738	0.333488	-4.99982	5.73851e-07	4.36108e-06
938	Zm00001d052480	73.8238	-1.66732	0.505482	-3.29847	0.000972137	0.00368963
939	Zm00001d017885	199.095	-1.66672	0.289482	-5.75761	8.5313e-09	8.69809e-08
940	Zm00001d014669	9213.88	-1.66666	0.110793	-15.043	3.83639e-51	4.16404e-49
941	Zm00001d001996	117.609	-1.66652	0.452451	-3.68331	0.000230224	0.00103398
942	Zm00001d021949	124.79	-1.66649	0.463287	-3.59709	0.000321799	0.0013926
943	Zm00001d013080	166.99	-1.66595	0.390745	-4.26351	2.01237e-05	0.000114585
944	Zm00001d031338	1602.75	-1.66427	0.244534	-6.80586	1.00445e-11	1.45504e-10
945	Zm00001d053586	2056.45	-1.66389	0.230064	-7.2323	4.74881e-13	7.78372e-12
946	Zm00001d051989	68.4785	-1.66149	0.507899	-3.27131	0.0010705	0.00399806
947	Zm00001d021241	552.344	-1.66003	0.250061	-6.63852	3.16839e-11	4.32721e-10
948	Zm00001d011918	731.432	-1.65945	0.209609	-7.91687	2.43566e-15	4.79626e-14
949	Zm00001d023765	155.69	-1.65825	0.345703	-4.79676	1.61254e-06	1.13252e-05
950	Zm00001d025330	63.1318	-1.6577	0.463059	-3.57989	0.000343745	0.00147939
951	Zm00001d022067	280.219	-1.65671	0.259375	-6.38733	1.68811e-10	2.14296e-09
952	Zm00001d038222	870.692	-1.65564	0.164729	-10.0507	9.12226e-24	3.34852e-22
953	Zm00001d010171	89.8516	-1.65537	0.69517	-2.38125	0.0172541	0.0437035
954	Zm00001d050095	481.206	-1.65521	0.291574	-5.67682	1.37225e-08	1.35759e-07
955	Zm00001d003422	119.382	-1.6536	0.365861	-4.51976	6.19106e-06	3.90666e-05
956	Zm00001d035166	261.401	-1.65344	0.302246	-5.4705	4.48759e-08	4.10157e-07
957	Zm00001d006874	1072.54	-1.65242	0.168246	-9.82148	9.10005e-23	3.1278e-21
958	Zm00001d037205	199.184	-1.65131	0.347377	-4.75366	1.99768e-06	1.38079e-05
959	Zm00001d029654	2896.74	-1.65061	0.131514	-12.5508	3.93339e-36	2.51349e-34
960	Zm00001d023316	1275.09	-1.6496	0.174517	-9.45237	3.31236e-21	1.035e-19
961	Zm00001d041660	211.366	-1.6495	0.385036	-4.28402	1.83548e-05	0.000105226
962	Zm00001d038065	79.4052	-1.64889	0.64234	-2.567	0.0102583	0.0282004
963	Zm00001d043586	30.7215	-1.64795	0.632789	-2.60427	0.00920698	0.0257471
964	Zm00001d004075	884.671	-1.64748	0.276055	-5.96794	2.40265e-09	2.6407e-08
965	Zm00001d017477	232.272	-1.64621	0.277798	-5.92592	3.10545e-09	3.36263e-08
966	Zm00001d010452	496.802	-1.64588	0.2057	-8.00137	1.23042e-15	2.47448e-14
967	Zm00001d040158	278.699	-1.64583	0.246958	-6.6644	2.65744e-11	3.66246e-10
968	Zm00001d020323	48.7187	-1.64575	0.592956	-2.7755	0.00551168	0.0166289
969	Zm00001d027815	250.146	-1.64522	0.306048	-5.3757	7.62857e-08	6.72839e-07
970	Zm00001d011931	668.744	-1.64508	0.217115	-7.57701	3.53623e-14	6.36845e-13
971	Zm00001d021444	57.4485	-1.64381	0.529028	-3.10723	0.00188851	0.00658888
972	Zm00001d051500	253.144	-1.6436	0.375408	-4.37817	1.1968e-05	7.12773e-05
973	Zm00001d017897	1071.41	-1.64148	0.169649	-9.67574	3.82305e-22	1.26239e-20
974	Zm00001d005032	152.638	-1.63904	0.389851	-4.20427	2.61929e-05	0.000145848
975	Zm00001d016842	324.44	-1.63804	0.324724	-5.04439	4.54971e-07	3.51294e-06
976	Zm00001d020723	234.898	-1.63666	0.335797	-4.87396	1.09382e-06	7.89225e-06
977	Zm00001d031167	190.427	-1.63619	0.28101	-5.82254	5.79587e-09	6.06175e-08
978	Zm00001d053352	96.4619	-1.63602	0.465394	-3.51535	0.000439179	0.00183815
979	Zm00001d042543	1713.39	-1.63498	0.524126	-3.11944	0.00181195	0.00635597
980	Zm00001d039251	107.372	-1.63306	0.383403	-4.25939	2.04985e-05	0.000116573
981	Zm00001d024386	89.7167	-1.6326	0.496498	-3.28823	0.00100819	0.00380484
982	Zm00001d010066	2058.13	-1.63182	0.171132	-9.53546	1.49218e-21	4.78785e-20
983	Zm00001d048381	231.343	-1.63173	0.321892	-5.06919	3.99511e-07	3.1182e-06
984	Zm00001d019910	47.6668	-1.63153	0.539526	-3.024	0.00249454	0.00835502
985	Zm00001d007471	80.1035	-1.63152	0.440737	-3.70181	0.00021407	0.000971624
986	Zm00001d020899	54.2843	-1.63022	0.534439	-3.05033	0.00228588	0.00775926
987	Zm00001d011688	1524.24	-1.62928	0.194863	-8.36119	6.20887e-17	1.40707e-15
988	Zm00001d014060	161.831	-1.6292	0.330078	-4.9358	7.98221e-07	5.90126e-06
989	Zm00001d004903	69.4798	-1.62792	0.456981	-3.56233	0.000367579	0.00156622
990	Zm00001d044725	48.1939	-1.62753	0.556574	-2.92419	0.00345359	0.0110938
991	Zm00001d038991	907.037	-1.62728	0.180989	-8.99104	2.44905e-19	6.61388e-18
992	Zm00001d041377	148.332	-1.62693	0.414939	-3.92089	8.82219e-05	0.000440042
993	Zm00001d004392	457.102	-1.62439	0.220152	-7.37846	1.60132e-13	2.73539e-12
994	Zm00001d021775	356.08	-1.62198	0.366477	-4.42588	9.60503e-06	5.8073e-05
995	Zm00001d029683	43.4426	-1.62151	0.553026	-2.93206	0.00336723	0.0108502
996	Zm00001d017643	225.794	-1.62137	0.370497	-4.37619	1.20774e-05	7.18057e-05
997	Zm00001d005814	106.896	-1.61903	0.486911	-3.3251	0.000883871	0.00339841
998	Zm00001d024442	253.091	-1.61884	0.326269	-4.96168	6.98858e-07	5.22531e-06
999	Zm00001d013178	251.858	-1.61847	0.345186	-4.68869	2.7496e-06	1.85836e-05
1000	Zm00001d015723	268.363	-1.61756	0.306406	-5.27914	1.2979e-07	1.09984e-06
1001	Zm00001d044580	62.6634	-1.6145	0.550674	-2.93186	0.00336942	0.0108557
1002	Zm00001d036280	1780.18	-1.61417	0.165637	-9.74523	1.93339e-22	6.50728e-21
1003	Zm00001d003676	47.8818	-1.61343	0.572125	-2.82006	0.00480148	0.014775
1004	Zm00001d047699	3880.06	-1.61117	0.125344	-12.8541	8.16193e-38	5.51051e-36
1005	Zm00001d021571	366.474	-1.60985	0.330273	-4.87428	1.09204e-06	7.88197e-06
1006	Zm00001d049932	144.603	-1.60783	0.358633	-4.48322	7.35262e-06	4.55971e-05
1007	Zm00001d012010	96.3512	-1.60711	0.373482	-4.30304	1.68474e-05	9.72476e-05
1008	Zm00001d017071	190.85	-1.60656	0.313375	-5.12663	2.9498e-07	2.36286e-06
1009	Zm00001d033684	1343.38	-1.60509	0.161096	-9.96358	2.19999e-23	7.83466e-22
1010	Zm00001d039710	325.581	-1.60457	0.227714	-7.04644	1.83553e-12	2.86375e-11
1011	Zm00001d006476	737.138	-1.60336	0.234418	-6.83977	7.93224e-12	1.16393e-10
1012	Zm00001d023304	626.702	-1.60241	0.300016	-5.34108	9.23968e-08	8.03073e-07
1013	Zm00001d046859	73.6557	-1.60124	0.444985	-3.59842	0.000320153	0.00138706
1014	Zm00001d051785	489.234	-1.60097	0.266756	-6.00162	1.95355e-09	2.1713e-08
1015	Zm00001d034571	320.545	-1.60049	0.290425	-5.51085	3.57115e-08	3.32423e-07
1016	Zm00001d053706	67.7135	-1.59716	0.577483	-2.76572	0.00567972	0.0170542
1017	Zm00001d029550	736.001	-1.59666	0.17836	-8.95188	3.49482e-19	9.37931e-18
1018	Zm00001d005544	550.014	-1.59459	0.237729	-6.70759	1.97858e-11	2.76892e-10
1019	Zm00001d013287	636.684	-1.59379	0.196251	-8.12118	4.61659e-16	9.67012e-15
1020	Zm00001d019692	44.9136	-1.59185	0.564375	-2.82055	0.00479414	0.0147645
1021	Zm00001d007267	2758.17	-1.59019	0.167242	-9.50833	1.93752e-21	6.17312e-20
1022	Zm00001d042541	17005.3	-1.58934	0.168257	-9.44589	3.52398e-21	1.09659e-19
1023	Zm00001d019704	161.716	-1.5883	0.350552	-4.53085	5.87477e-06	3.7226e-05
1024	Zm00001d002473	110.139	-1.5881	0.477273	-3.32745	0.000876461	0.0033745
1025	Zm00001d032548	423.083	-1.58725	0.209563	-7.5741	3.61627e-14	6.50555e-13
1026	Zm00001d039932	172.173	-1.58468	0.342847	-4.62213	3.79826e-06	2.50112e-05
1027	Zm00001d051552	1873.82	-1.58442	0.166092	-9.53936	1.4371e-21	4.61764e-20
1028	Zm00001d012292	160.594	-1.58424	0.372267	-4.25564	2.08448e-05	0.000118394
1029	Zm00001d035157	878.397	-1.58369	0.313185	-5.05673	4.26514e-07	3.30672e-06
1030	Zm00001d008499	133.481	-1.58261	0.403607	-3.92117	8.81202e-05	0.000439632
1031	Zm00001d017199	401.598	-1.58129	0.289867	-5.45522	4.89119e-08	4.44538e-07
1032	Zm00001d031638	312.404	-1.58045	0.23868	-6.62162	3.55277e-11	4.82314e-10
1033	Zm00001d017256	273.41	-1.57937	0.260054	-6.07325	1.25344e-09	1.42886e-08
1034	ZeamMp044	131.818	-1.57908	0.460099	-3.43206	0.000599025	0.00241795
1035	Zm00001d052640	518.416	-1.57853	0.234584	-6.72908	1.70735e-11	2.40866e-10
1036	Zm00001d032827	35.7762	-1.57817	0.584101	-2.70187	0.00689511	0.0201905
1037	Zm00001d037695	882.768	-1.5766	0.213184	-7.3955	1.40877e-13	2.42106e-12
1038	Zm00001d016682	108.872	-1.57648	0.348753	-4.52034	6.17405e-06	3.897e-05
1039	Zm00001d048139	674.899	-1.57608	0.220854	-7.1363	9.58794e-13	1.52526e-11
1040	Zm00001d053757	76.082	-1.57512	0.484004	-3.25436	0.00113649	0.00421923
1041	Zm00001d033369	29189	-1.57402	0.109027	-14.4369	3.02974e-47	2.87572e-45
1042	Zm00001d004772	568.375	-1.57354	0.208859	-7.53397	4.92216e-14	8.76447e-13
1043	Zm00001d034179	300.166	-1.5735	0.399055	-3.94307	8.04447e-05	0.000404542
1044	Zm00001d002600	665.926	-1.57332	0.194317	-8.09666	5.64869e-16	1.17238e-14
1045	Zm00001d046945	114.283	-1.57281	0.61173	-2.57109	0.010138	0.0279239
1046	Zm00001d039276	1258.82	-1.56942	0.221676	-7.07977	1.44392e-12	2.26681e-11
1047	Zm00001d019866	638.053	-1.56828	0.204939	-7.65243	1.97211e-14	3.60494e-13
1048	Zm00001d047931	343.927	-1.56797	0.289535	-5.41547	6.11287e-08	5.48104e-07
1049	Zm00001d005479	174.375	-1.56791	0.300384	-5.21967	1.79241e-07	1.48451e-06
1050	Zm00001d028471	192.75	-1.56593	0.366549	-4.27208	1.93661e-05	0.000110382
1051	Zm00001d048783	2207.83	-1.56562	0.229561	-6.82003	9.10202e-12	1.32443e-10
1052	Zm00001d051419	7509.89	-1.56519	0.134972	-11.5964	4.29736e-31	2.21558e-29
1053	Zm00001d052174	79.4667	-1.56469	0.413902	-3.78034	0.000156613	0.000735107
1054	Zm00001d026231	2988.6	-1.5643	0.125646	-12.45	1.39803e-35	8.6415e-34
1055	Zm00001d034829	135.689	-1.56309	0.406783	-3.84257	0.000121755	0.000587038
1056	Zm00001d047182	115.576	-1.559	0.351463	-4.43575	9.1752e-06	5.57268e-05
1057	Zm00001d037160	119.825	-1.55691	0.533188	-2.91999	0.00350039	0.011233
1058	Zm00001d052464	48.5385	-1.55682	0.582775	-2.67139	0.00755386	0.021807
1059	Zm00001d023395	3647.33	-1.55592	0.168762	-9.2196	2.98215e-20	8.60687e-19
1060	Zm00001d007768	563.221	-1.55362	0.180364	-8.61379	7.06819e-18	1.7094e-16
1061	Zm00001d031509	291.046	-1.5532	0.288283	-5.38775	7.13443e-08	6.32947e-07
1062	Zm00001d023936	62.1769	-1.55062	0.514267	-3.01521	0.002568	0.00856818
1063	Zm00001d037743	302.838	-1.54988	0.258052	-6.00607	1.90078e-09	2.11784e-08
1064	Zm00001d020540	373.691	-1.54945	0.23764	-6.52016	7.02341e-11	9.27392e-10
1065	Zm00001d049741	404.887	-1.54805	0.339007	-4.56642	4.96135e-06	3.19195e-05
1066	Zm00001d010285	485.956	-1.54775	0.212327	-7.28947	3.11173e-13	5.20188e-12
1067	Zm00001d001662	49.6255	-1.54772	0.624938	-2.4766	0.0132641	0.0350327
1068	Zm00001d023269	50.4371	-1.54681	0.576495	-2.68314	0.00729351	0.0211821
1069	Zm00001d012196	4489.96	-1.54656	0.12576	-12.2976	9.32566e-35	5.61147e-33
1070	Zm00001d029304	1326.31	-1.54478	0.289843	-5.32973	9.83601e-08	8.52291e-07
1071	Zm00001d021290	119.183	-1.53897	0.365283	-4.21308	2.51912e-05	0.000140824
1072	Zm00001d045393	954.279	-1.53803	0.162529	-9.46313	2.98863e-21	9.41627e-20
1073	Zm00001d010343	1050.17	-1.53713	0.181872	-8.45173	2.87021e-17	6.70554e-16
1074	Zm00001d041990	59.9061	-1.53611	0.553403	-2.77574	0.00550757	0.0166209
1075	Zm00001d044302	280.141	-1.53598	0.284311	-5.40246	6.57345e-08	5.87312e-07
1076	Zm00001d022519	93.5646	-1.53531	0.43056	-3.56584	0.000362696	0.00154812
1077	Zm00001d028510	1057.08	-1.53451	0.242875	-6.31812	2.64772e-10	3.27858e-09
1078	Zm00001d013906	456.145	-1.5341	0.245239	-6.25553	3.96163e-10	4.80585e-09
1079	Zm00001d019251	27.3294	-1.53399	0.659548	-2.32582	0.0200281	0.0495298
1080	Zm00001d037818	427.607	-1.53389	0.221169	-6.93541	4.05059e-12	6.10143e-11
1081	Zm00001d053941	77.3868	-1.5308	0.47628	-3.21407	0.00130867	0.0047844
1082	Zm00001d034615	578.54	-1.53037	0.18986	-8.06049	7.59913e-16	1.55865e-14
1083	Zm00001d042347	15266.1	-1.52939	0.127634	-11.9826	4.38288e-33	2.48564e-31
1084	Zm00001d008121	160.231	-1.52932	0.317319	-4.81951	1.43912e-06	1.01873e-05
1085	Zm00001d026298	71.8669	-1.52882	0.563643	-2.7124	0.00667981	0.0196488
1086	Zm00001d032510	45.1971	-1.52849	0.571744	-2.67338	0.00750909	0.0217026
1087	Zm00001d044666	71.0413	-1.52812	0.483373	-3.16137	0.00157027	0.00561322
1088	Zm00001d016895	801.683	-1.52747	0.221378	-6.89982	5.20695e-12	7.77614e-11
1089	Zm00001d032016	416.26	-1.5271	0.280468	-5.44484	5.1852e-08	4.69566e-07
1090	Zm00001d002748	52.6738	-1.52687	0.493577	-3.09348	0.00197821	0.00685231
1091	Zm00001d034763	364.023	-1.52618	0.256729	-5.94474	2.76898e-09	3.01413e-08
1092	Zm00001d027881	120.079	-1.52604	0.413644	-3.68925	0.000224918	0.00101348
1093	Zm00001d032324	198.984	-1.52586	0.365936	-4.16976	3.04923e-05	0.000167041
1094	Zm00001d021104	28.6577	-1.52552	0.647204	-2.3571	0.0184184	0.0460863
1095	Zm00001d047774	384.243	-1.52486	0.306897	-4.96864	6.74229e-07	5.05115e-06
1096	Zm00001d006527	840.031	-1.52406	0.195912	-7.77932	7.29182e-15	1.38423e-13
1097	Zm00001d009587	578.978	-1.52305	0.201302	-7.56602	3.84846e-14	6.91777e-13
1098	Zm00001d038585	817.173	-1.52279	0.317061	-4.80284	1.56428e-06	1.10033e-05
1099	Zm00001d009605	48.5361	-1.52129	0.572615	-2.65674	0.00789009	0.0226136
1100	Zm00001d024017	122.392	-1.52102	0.405353	-3.75233	0.000175195	0.000812907
1101	Zm00001d008099	107.521	-1.51874	0.512066	-2.96592	0.00301783	0.00987585
1102	Zm00001d011403	383.513	-1.51844	0.207084	-7.33245	2.25983e-13	3.8314e-12
1103	Zm00001d027589	4545.79	-1.51617	0.139253	-10.8879	1.31569e-27	5.80669e-26
1104	Zm00001d051746	1198.53	-1.5153	0.199165	-7.60827	2.77781e-14	5.03715e-13
1105	Zm00001d006140	44.8369	-1.51508	0.569262	-2.66147	0.00777991	0.0223515
1106	Zm00001d040365	431.162	-1.51255	0.267178	-5.66118	1.50332e-08	1.48193e-07
1107	Zm00001d010290	1153.75	-1.51081	0.192922	-7.8312	4.83253e-15	9.314e-14
1108	Zm00001d033327	115.453	-1.51066	0.457958	-3.29869	0.000971376	0.00368736
1109	Zm00001d016826	1772.88	-1.50911	0.180734	-8.34989	6.83245e-17	1.54377e-15
1110	Zm00001d048681	202.702	-1.50849	0.382639	-3.94234	8.069e-05	0.000405685
1111	Zm00001d000135	1388.95	-1.50836	0.165338	-9.1229	7.3139e-20	2.05596e-18
1112	Zm00001d039426	118.446	-1.50657	0.382642	-3.93729	8.2408e-05	0.000413681
1113	Zm00001d053117	274.72	-1.50253	0.242949	-6.18457	6.22717e-10	7.35747e-09
1114	Zm00001d038651	882.579	-1.50134	0.234227	-6.40975	1.45757e-10	1.85967e-09
1115	Zm00001d047395	901.108	-1.50068	0.198058	-7.57697	3.53725e-14	6.36845e-13
1116	Zm00001d034729	216.356	-1.49835	0.357969	-4.18569	2.84301e-05	0.000156652
1117	Zm00001d016727	119.714	-1.49812	0.420374	-3.56378	0.000365553	0.00155875
1118	Zm00001d014949	913.814	-1.49761	0.258806	-5.78663	7.18131e-09	7.37474e-08
1119	Zm00001d050272	153.233	-1.49701	0.344293	-4.34807	1.37342e-05	8.07361e-05
1120	Zm00001d040769	1497.97	-1.49671	0.211277	-7.08411	1.39938e-12	2.2007e-11
1121	Zm00001d049259	291.802	-1.49604	0.279215	-5.35803	8.41357e-08	7.38058e-07
1122	Zm00001d010172	252.184	-1.49587	0.2729	-5.48136	4.22066e-08	3.87321e-07
1123	Zm00001d046385	772.835	-1.49514	0.189747	-7.87962	3.28367e-15	6.42156e-14
1124	Zm00001d011743	60.4825	-1.49441	0.465254	-3.21204	0.00131797	0.00480638
1125	Zm00001d006353	141.353	-1.49288	0.427454	-3.49249	0.000478544	0.00198207
1126	zma-MIR160d	40.7872	-1.49131	0.542115	-2.75092	0.00594289	0.0177318
1127	Zm00001d004998	157.16	-1.49002	0.303086	-4.91617	8.82523e-07	6.48317e-06
1128	Zm00001d013529	553.029	-1.48907	0.303194	-4.91128	9.04826e-07	6.63287e-06
1129	Zm00001d051082	684.223	-1.48831	0.18671	-7.97127	1.57053e-15	3.13899e-14
1130	Zm00001d002597	1218.12	-1.48708	0.194693	-7.63807	2.20509e-14	4.02111e-13
1131	Zm00001d051934	295.219	-1.48683	0.2802	-5.3063	1.11872e-07	9.61295e-07
1132	Zm00001d015905	272.673	-1.48669	0.383242	-3.87924	0.000104784	0.000512289
1133	Zm00001d044918	532.327	-1.48537	0.219419	-6.76955	1.2918e-11	1.84886e-10
1134	Zm00001d028331	293.252	-1.48363	0.387025	-3.83341	0.000126379	0.000605982
1135	Zm00001d027659	1375.28	-1.48346	0.160545	-9.24017	2.46116e-20	7.17628e-19
1136	Zm00001d037194	36.3207	-1.48307	0.627282	-2.36427	0.0180655	0.0453335
1137	Zm00001d002823	7538.77	-1.48296	0.211934	-6.99726	2.61011e-12	4.01426e-11
1138	Zm00001d013519	551.252	-1.48268	0.228854	-6.47871	9.25105e-11	1.20957e-09
1139	Zm00001d046667	174.753	-1.48235	0.357626	-4.14496	3.39868e-05	0.000184315
1140	Zm00001d023501	68.4148	-1.48177	0.485816	-3.05007	0.00228791	0.00776223
1141	Zm00001d008706	236.514	-1.4808	0.388733	-3.80931	0.000139355	0.000661909
1142	Zm00001d007712	161.031	-1.47975	0.377425	-3.92065	8.83121e-05	0.000440299
1143	Zm00001d040361	293.191	-1.47935	0.267464	-5.53102	3.18376e-08	2.98692e-07
1144	Zm00001d043232	53.1126	-1.47729	0.52977	-2.78856	0.00529432	0.0160686
1145	Zm00001d049525	1409.62	-1.47729	0.175115	-8.43612	3.28034e-17	7.62443e-16
1146	Zm00001d042997	1690.11	-1.47721	0.144541	-10.22	1.61398e-24	6.11238e-23
1147	Zm00001d033150	78.976	-1.47627	0.474476	-3.11137	0.00186224	0.00650924
1148	Zm00001d018178	730.32	-1.47614	0.332663	-4.43736	9.10698e-06	5.53569e-05
1149	Zm00001d048315	3907.41	-1.47556	0.155352	-9.49814	2.13663e-21	6.78844e-20
1150	Zm00001d044399	35.2455	-1.47513	0.600665	-2.45582	0.0140562	0.036761
1151	Zm00001d008623	68.4608	-1.47334	0.551986	-2.66916	0.00760415	0.0219279
1152	Zm00001d053860	122.389	-1.47229	0.375966	-3.91601	9.00254e-05	0.00044825
1153	Zm00001d046925	1300.67	-1.47177	0.164588	-8.94216	3.8164e-19	1.01973e-17
1154	Zm00001d005532	322.896	-1.47134	0.255842	-5.75097	8.87354e-09	9.01865e-08
1155	Zm00001d053156	68.6497	-1.46967	0.519875	-2.82696	0.00469916	0.0144976
1156	Zm00001d033035	225.072	-1.46901	0.318371	-4.61415	3.94708e-06	2.59385e-05
1157	Zm00001d047178	1877.94	-1.46793	0.158468	-9.26327	1.98263e-20	5.84103e-19
1158	Zm00001d029129	1227.99	-1.46787	0.157805	-9.30181	1.3808e-20	4.12692e-19
1159	Zm00001d052164	305.634	-1.46681	0.350163	-4.18892	2.80283e-05	0.000154664
1160	Zm00001d031995	1997.01	-1.46673	0.145941	-10.0502	9.16944e-24	3.3604e-22
1161	Zm00001d002833	1536.51	-1.46638	0.157192	-9.3286	1.07283e-20	3.23632e-19
1162	Zm00001d021197	414.904	-1.46582	0.307149	-4.77234	1.82096e-06	1.2683e-05
1163	Zm00001d048437	3291.66	-1.46533	0.166784	-8.78582	1.55225e-18	3.96987e-17
1164	Zm00001d044259	60.7931	-1.46489	0.59181	-2.47528	0.0133133	0.0351422
1165	Zm00001d008222	310.836	-1.46212	0.377468	-3.87349	0.000107289	0.000523073
1166	Zm00001d052165	451.778	-1.46188	0.27932	-5.23372	1.66128e-07	1.38247e-06
1167	Zm00001d020257	170.993	-1.4603	0.50491	-2.89219	0.00382563	0.0121207
1168	Zm00001d028555	6455.5	-1.4594	0.174024	-8.3862	5.02096e-17	1.15051e-15
1169	Zm00001d012287	221.6	-1.45933	0.339695	-4.296	1.73904e-05	0.000100127
1170	Zm00001d006461	6298.89	-1.45908	0.12445	-11.7242	9.57647e-32	5.09958e-30
1171	Zm00001d045338	95.0675	-1.45616	0.394866	-3.68773	0.000226259	0.00101819
1172	Zm00001d009668	164.538	-1.4551	0.311229	-4.67532	2.93491e-06	1.97269e-05
1173	Zm00001d006768	74.0322	-1.45474	0.437183	-3.32754	0.000876153	0.00337388
1174	Zm00001d041496	556.852	-1.4533	0.253523	-5.73241	9.90158e-09	1.00052e-07
1175	Zm00001d012080	159.376	-1.453	0.40819	-3.55962	0.000371391	0.00158127
1176	Zm00001d016885	1064.14	-1.45261	0.238763	-6.08387	1.17313e-09	1.34203e-08
1177	Zm00001d002139	528.922	-1.45249	0.196145	-7.40519	1.30962e-13	2.25237e-12
1178	Zm00001d018227	570.899	-1.45132	0.242595	-5.98248	2.19764e-09	2.42951e-08
1179	Zm00001d043024	83.4372	-1.4496	0.49917	-2.90402	0.00368408	0.0117329
1180	Zm00001d024499	344.206	-1.44937	0.315721	-4.59068	4.41812e-06	2.87838e-05
1181	Zm00001d031412	686.452	-1.44812	0.27413	-5.28259	1.27367e-07	1.08174e-06
1182	Zm00001d014553	651.322	-1.44688	0.200961	-7.19977	6.03127e-13	9.77281e-12
1183	Zm00001d002589	414.904	-1.44599	0.229554	-6.29914	2.9931e-10	3.67218e-09
1184	Zm00001d022111	1663.72	-1.44517	0.211027	-6.84828	7.47434e-12	1.09958e-10
1185	Zm00001d008214	378.582	-1.44477	0.346526	-4.16929	3.05556e-05	0.000167347
1186	Zm00001d022021	357.602	-1.44371	0.301715	-4.78502	1.70973e-06	1.19609e-05
1187	Zm00001d043705	793.037	-1.44238	0.16704	-8.63497	5.87428e-18	1.43907e-16
1188	Zm00001d001908	1972.72	-1.44228	0.161277	-8.94288	3.79161e-19	1.0143e-17
1189	Zm00001d035168	2633.55	-1.44223	0.152319	-9.46848	2.83946e-21	8.97119e-20
1190	Zm00001d047234	9589.64	-1.4421	0.191815	-7.51819	5.55417e-14	9.85886e-13
1191	Zm00001d008287	3932.05	-1.44209	0.172791	-8.34583	7.07139e-17	1.59616e-15
1192	Zm00001d023785	686.945	-1.44108	0.226901	-6.35114	2.13729e-10	2.66984e-09
1193	Zm00001d005642	12405	-1.43918	0.184592	-7.79654	6.36262e-15	1.21291e-13
1194	Zm00001d028588	257.991	-1.43729	0.411972	-3.48881	0.00048517	0.00200621
1195	Zm00001d026104	327.864	-1.43722	0.277658	-5.17622	2.26429e-07	1.84701e-06
1196	Zm00001d000411	246.21	-1.43645	0.321551	-4.46725	7.92299e-06	4.87478e-05
1197	Zm00001d040032	89.7988	-1.43561	0.421593	-3.40521	0.000661125	0.00263486
1198	Zm00001d032837	280.042	-1.43514	0.234551	-6.11865	9.43699e-10	1.09335e-08
1199	Zm00001d047283	7365.79	-1.4349	0.118705	-12.088	1.22285e-33	7.0766e-32
1200	Zm00001d014073	5683.27	-1.43375	0.120774	-11.8713	1.66784e-32	9.2733e-31
1201	Zm00001d013135	330.8	-1.43253	0.31477	-4.55106	5.33771e-06	3.4128e-05
1202	Zm00001d005482	381.294	-1.43009	0.223437	-6.40042	1.54952e-10	1.97144e-09
1203	Zm00001d014826	4336.64	-1.42947	0.18285	-7.81771	5.37914e-15	1.03149e-13
1204	Zm00001d017495	96.2895	-1.42897	0.409945	-3.48577	0.000490718	0.00202646
1205	Zm00001d046714	102.879	-1.42804	0.400817	-3.56282	0.000366887	0.00156415
1206	Zm00001d023529	93.2869	-1.42788	0.417327	-3.42148	0.000622804	0.00250147
1207	Zm00001d009631	4443.43	-1.42755	0.141146	-10.1139	4.79147e-24	1.79068e-22
1208	Zm00001d022563	503.229	-1.42696	0.258197	-5.52661	3.26476e-08	3.05784e-07
1209	Zm00001d014834	102.902	-1.42603	0.406662	-3.50667	0.00045375	0.00189076
1210	Zm00001d023581	61.3791	-1.42596	0.459708	-3.10187	0.00192302	0.00669093
1211	Zm00001d018470	492.389	-1.42571	0.228726	-6.23326	4.56838e-10	5.50657e-09
1212	Zm00001d043851	2766.46	-1.42402	0.146782	-9.70159	2.96836e-22	9.85903e-21
1213	Zm00001d039679	111.845	-1.42212	0.420689	-3.38046	0.000723642	0.00285046
1214	Zm00001d040197	69.3198	-1.41959	0.437857	-3.24213	0.00118641	0.00438264
1215	Zm00001d019844	62.342	-1.41954	0.455385	-3.11723	0.00182556	0.00639582
1216	Zm00001d002198	44.4951	-1.41859	0.608782	-2.33022	0.0197947	0.0490382
1217	Zm00001d043291	1177.59	-1.41838	0.164516	-8.62154	6.60569e-18	1.60439e-16
1218	Zm00001d005306	162.774	-1.41833	0.429796	-3.29999	0.000966866	0.0036727
1219	Zm00001d013065	4045.22	-1.41825	0.132825	-10.6776	1.29566e-26	5.47337e-25
1220	Zm00001d033483	163.28	-1.41739	0.362843	-3.90633	9.3707e-05	0.000464745
1221	Zm00001d005429	504.218	-1.41677	0.235701	-6.01086	1.84543e-09	2.05818e-08
1222	Zm00001d024808	830.15	-1.4167	0.219618	-6.45075	1.11295e-10	1.44435e-09
1223	Zm00001d005627	2176.36	-1.41649	0.156592	-9.04572	1.48681e-19	4.06366e-18
1224	Zm00001d047503	9252.62	-1.41625	0.115797	-12.2305	2.13688e-34	1.27566e-32
1225	Zm00001d033267	64.4102	-1.41533	0.498402	-2.83974	0.00451507	0.014002
1226	Zm00001d039584	1418.61	-1.41465	0.166359	-8.50363	1.83747e-17	4.33296e-16
1227	Zm00001d036437	534.493	-1.41416	0.21148	-6.68695	2.2787e-11	3.16354e-10
1228	Zm00001d048178	2057.53	-1.41386	0.235967	-5.99179	2.07539e-09	2.30221e-08
1229	Zm00001d031488	133.075	-1.41163	0.438707	-3.21771	0.0012922	0.00473256
1230	Zm00001d021334	116.015	-1.4101	0.386296	-3.65031	0.000261921	0.00115935
1231	Zm00001d051246	167.842	-1.40944	0.311527	-4.52429	6.05993e-06	3.82817e-05
1232	Zm00001d040185	1231.29	-1.40931	0.163518	-8.61868	6.77294e-18	1.64325e-16
1233	Zm00001d009025	48.3051	-1.40886	0.56528	-2.49232	0.012691	0.033807
1234	Zm00001d024886	1522.12	-1.40865	0.198863	-7.0835	1.40559e-12	2.20816e-11
1235	Zm00001d026677	1123.7	-1.40806	0.18739	-7.5141	5.73055e-14	1.01561e-12
1236	Zm00001d006750	5483.98	-1.40433	0.144536	-9.71612	2.57391e-22	8.57403e-21
1237	Zm00001d044461	4145	-1.40432	0.131733	-10.6603	1.5607e-26	6.54425e-25
1238	Zm00001d031465	152.234	-1.40397	0.353468	-3.97199	7.12759e-05	0.000362126
1239	Zm00001d010715	85.9912	-1.40216	0.450004	-3.11588	0.00183394	0.00641979
1240	Zm00001d035994	90.0466	-1.40094	0.42774	-3.27522	0.00105579	0.0039516
1241	Zm00001d031539	1282.39	-1.40011	0.191442	-7.31349	2.60301e-13	4.39682e-12
1242	Zm00001d028565	104.942	-1.40003	0.490982	-2.85148	0.00435161	0.0135749
1243	Zm00001d031981	1428.33	-1.39945	0.161485	-8.66615	4.46989e-18	1.10577e-16
1244	Zm00001d047976	1012.35	-1.39872	0.20563	-6.80213	1.03087e-11	1.4914e-10
1245	Zm00001d009609	573.854	-1.39758	0.229493	-6.08986	1.13011e-09	1.29537e-08
1246	Zm00001d050000	876.205	-1.39692	0.181583	-7.69304	1.43682e-14	2.65641e-13
1247	Zm00001d016818	702.382	-1.39562	0.213312	-6.54265	6.04368e-11	8.05055e-10
1248	Zm00001d052079	1791.48	-1.39512	0.168549	-8.27726	1.26039e-16	2.75985e-15
1249	Zm00001d008007	228.263	-1.39492	0.351736	-3.96581	7.31485e-05	0.000371141
1250	Zm00001d034715	423.517	-1.39456	0.222861	-6.25755	3.9108e-10	4.74673e-09
1251	Zm00001d005110	3381.85	-1.39238	0.162491	-8.56901	1.04382e-17	2.50571e-16
1252	Zm00001d015335	232.175	-1.39136	0.290392	-4.79131	1.65694e-06	1.16227e-05
1253	Zm00001d037983	1036.29	-1.38999	0.164101	-8.47032	2.44721e-17	5.74094e-16
1254	Zm00001d035046	1002.76	-1.38976	0.24437	-5.68714	1.29188e-08	1.28194e-07
1255	Zm00001d040624	175.337	-1.38922	0.331285	-4.19344	2.74756e-05	0.000151946
1256	Zm00001d033082	491.771	-1.38714	0.265869	-5.21736	1.81489e-07	1.50094e-06
1257	Zm00001d006002	782.112	-1.38689	0.202322	-6.85486	7.13813e-12	1.0508e-10
1258	Zm00001d026137	45.2769	-1.38541	0.569166	-2.43411	0.0149286	0.0386461
1259	Zm00001d008527	344.843	-1.38391	0.283205	-4.8866	1.0259e-06	7.44008e-06
1260	Zm00001d019049	117.167	-1.38383	0.534476	-2.58914	0.00962171	0.0267104
1261	Zm00001d020630	89.738	-1.38383	0.432816	-3.19726	0.00138741	0.00503896
1262	Zm00001d031989	95.4014	-1.38381	0.409648	-3.37805	0.000730009	0.00287315
1263	Zm00001d020551	41.8768	-1.38192	0.585389	-2.36068	0.0182413	0.0457141
1264	Zm00001d042447	259.606	-1.37944	0.318803	-4.32695	1.51187e-05	8.81664e-05
1265	Zm00001d032380	262.013	-1.37819	0.258971	-5.3218	1.02748e-07	8.8659e-07
1266	Zm00001d054085	53.1691	-1.37812	0.497594	-2.76957	0.00561309	0.0168854
1267	Zm00001d008721	185.296	-1.37644	0.363005	-3.7918	0.000149561	0.000706245
1268	Zm00001d022506	322.732	-1.37642	0.246945	-5.57379	2.49251e-08	2.36977e-07
1269	Zm00001d027874	5096.38	-1.37444	0.117158	-11.7315	8.78722e-32	4.69031e-30
1270	Zm00001d043782	1041.83	-1.37355	0.213932	-6.42048	1.35846e-10	1.74204e-09
1271	Zm00001d012126	4205.02	-1.37347	0.160869	-8.53782	1.3678e-17	3.2593e-16
1272	Zm00001d021816	1014.16	-1.37346	0.295784	-4.64345	3.42637e-06	2.27805e-05
1273	Zm00001d015067	116.075	-1.37326	0.353983	-3.87944	0.000104696	0.000512018
1274	Zm00001d033797	798.51	-1.37285	0.28182	-4.87137	1.10829e-06	7.99411e-06
1275	Zm00001d022240	2589.15	-1.37273	0.162626	-8.44105	3.14489e-17	7.32463e-16
1276	Zm00001d026012	148.224	-1.37201	0.32635	-4.2041	2.62118e-05	0.000145918
1277	Zm00001d017622	261.219	-1.37191	0.404959	-3.38778	0.000704616	0.0027847
1278	Zm00001d009702	4101.7	-1.37065	0.190744	-7.18579	6.6822e-13	1.0766e-11
1279	Zm00001d003315	90.123	-1.36915	0.435321	-3.14515	0.00166004	0.00589195
1280	Zm00001d005639	104.491	-1.36851	0.384669	-3.55764	0.000374201	0.00159084
1281	Zm00001d050690	58.8495	-1.36824	0.476298	-2.87266	0.00407034	0.0128013
1282	Zm00001d017079	709.734	-1.36816	0.196088	-6.97728	3.00952e-12	4.5881e-11
1283	Zm00001d025761	1408.78	-1.36803	0.15537	-8.80498	1.30878e-18	3.35097e-17
1284	Zm00001d043550	194.97	-1.36721	0.330407	-4.13796	3.50408e-05	0.000189578
1285	Zm00001d040115	107.767	-1.36617	0.380982	-3.58593	0.000335879	0.00144911
1286	Zm00001d038605	81.4671	-1.36536	0.517428	-2.63874	0.00832144	0.0236837
1287	Zm00001d034990	322.655	-1.3639	0.303121	-4.49952	6.81074e-06	4.25976e-05
1288	Zm00001d028241	88.6239	-1.36388	0.438658	-3.10922	0.00187583	0.00655045
1289	Zm00001d020607	316.085	-1.36263	0.274517	-4.96372	6.91549e-07	5.17237e-06
1290	Zm00001d000377	117.373	-1.36257	0.384386	-3.54479	0.000392929	0.00166112
1291	Zm00001d031749	7769.85	-1.3621	0.133881	-10.174	2.59125e-24	9.76452e-23
1292	Zm00001d002954	484.028	-1.35908	0.240285	-5.6561	1.54847e-08	1.52461e-07
1293	Zm00001d028328	149.867	-1.35866	0.352514	-3.8542	0.000116109	0.000562085
1294	Zm00001d008842	310.714	-1.35813	0.29723	-4.56929	4.89385e-06	3.15156e-05
1295	Zm00001d033300	96.602	-1.35656	0.463994	-2.92365	0.00345951	0.0111113
1296	Zm00001d001993	285.289	-1.35655	0.259112	-5.23538	1.64645e-07	1.37164e-06
1297	Zm00001d016991	1491.14	-1.35611	0.287054	-4.72423	2.30994e-06	1.5812e-05
1298	Zm00001d000143	3713	-1.35521	0.12207	-11.1019	1.22776e-28	5.70734e-27
1299	Zm00001d003469	150.506	-1.35505	0.348955	-3.88316	0.000103106	0.000505674
1300	Zm00001d013331	213.625	-1.35459	0.306969	-4.4128	1.02041e-05	6.13516e-05
1301	Zm00001d033020	16791.2	-1.35458	0.171675	-7.89036	3.01323e-15	5.90286e-14
1302	Zm00001d043346	74.9533	-1.35455	0.506532	-2.67416	0.00749169	0.0216606
1303	Zm00001d008273	67.8149	-1.35451	0.513526	-2.63767	0.00834788	0.0237516
1304	Zm00001d050851	1643.38	-1.35399	0.146111	-9.26688	1.91667e-20	5.65405e-19
1305	Zm00001d049686	91.4213	-1.35392	0.414465	-3.26667	0.00108821	0.00405421
1306	Zm00001d001865	199.369	-1.35385	0.301288	-4.49352	7.00558e-06	4.36718e-05
1307	Zm00001d007190	342.5	-1.35361	0.3395	-3.98707	6.68949e-05	0.000342167
1308	Zm00001d008693	746.764	-1.35276	0.194453	-6.95671	3.48321e-12	5.27129e-11
1309	Zm00001d048127	2949.43	-1.35168	0.159119	-8.49476	1.98346e-17	4.67236e-16
1310	Zm00001d017357	1733.42	-1.35117	0.190734	-7.08406	1.39987e-12	2.2007e-11
1311	Zm00001d045134	85.6466	-1.35079	0.430094	-3.14068	0.00168553	0.00596324
1312	Zm00001d053805	896.416	-1.34935	0.174983	-7.71132	1.24526e-14	2.31358e-13
1313	Zm00001d034497	483.998	-1.34913	0.331743	-4.06678	4.76669e-05	0.00025048
1314	Zm00001d026629	675.742	-1.34899	0.210132	-6.41971	1.36535e-10	1.74989e-09
1315	Zm00001d001772	85.2048	-1.34821	0.433996	-3.1065	0.00189314	0.00659994
1316	Zm00001d013406	123.343	-1.34624	0.344248	-3.91066	9.20456e-05	0.000457105
1317	Zm00001d041326	311.576	-1.34583	0.263495	-5.10761	3.26263e-07	2.58605e-06
1318	Zm00001d027330	53.4104	-1.34349	0.513651	-2.61557	0.00890792	0.0250528
1319	Zm00001d043238	59.3575	-1.34327	0.49816	-2.69645	0.00700822	0.0204688
1320	Zm00001d030751	62.1294	-1.34315	0.517389	-2.59601	0.00943132	0.0262773
1321	Zm00001d003151	782.842	-1.3423	0.180644	-7.43065	1.08062e-13	1.87415e-12
1322	Zm00001d038539	289.954	-1.34106	0.253624	-5.28757	1.2395e-07	1.05588e-06
1323	Zm00001d018290	1093.84	-1.34037	0.168712	-7.94473	1.94607e-15	3.86572e-14
1324	Zm00001d017817	62.0301	-1.34015	0.520883	-2.57285	0.0100865	0.0277957
1325	Zm00001d011224	2710.8	-1.33881	0.141918	-9.43368	3.95932e-21	1.22701e-19
1326	Zm00001d025580	1650.14	-1.33664	0.144975	-9.21981	2.97615e-20	8.60052e-19
1327	Zm00001d027684	70.8916	-1.33645	0.519361	-2.57326	0.0100745	0.027776
1328	Zm00001d035835	103.434	-1.33611	0.387604	-3.44711	0.000566615	0.00230023
1329	Zm00001d036688	52.4822	-1.33561	0.495151	-2.69737	0.00698894	0.020423
1330	Zm00001d020717	643.326	-1.33437	0.287548	-4.64053	3.47519e-06	2.30578e-05
1331	Zm00001d014063	314.789	-1.33379	0.346755	-3.84649	0.000119821	0.000579067
1332	Zm00001d043599	1404.35	-1.33299	0.179805	-7.41353	1.22978e-13	2.11988e-12
1333	Zm00001d015126	210.998	-1.33279	0.4258	-3.13009	0.00174752	0.00615757
1334	Zm00001d044419	152.637	-1.33152	0.373192	-3.56793	0.000359808	0.00153845
1335	Zm00001d044836	394.147	-1.33082	0.228172	-5.83253	5.45916e-09	5.72808e-08
1336	Zm00001d013668	757.251	-1.32963	0.189381	-7.02095	2.20362e-12	3.41456e-11
1337	Zm00001d002449	3070.86	-1.32873	0.134439	-9.88351	4.90806e-23	1.7182e-21
1338	Zm00001d023430	577.243	-1.32782	0.202854	-6.54568	5.92256e-11	7.89384e-10
1339	Zm00001d018652	169.685	-1.32652	0.356566	-3.72026	0.000199021	0.000909876
1340	Zm00001d003545	137.3	-1.32641	0.351638	-3.7721	0.000161883	0.000756708
1341	Zm00001d004798	267.77	-1.32479	0.26771	-4.9486	7.47502e-07	5.55672e-06
1342	Zm00001d012848	269.05	-1.32479	0.265587	-4.98815	6.096e-07	4.60499e-06
1343	Zm00001d042060	88.8138	-1.32467	0.433441	-3.05617	0.00224181	0.00763022
1344	Zm00001d052840	9561.57	-1.3239	0.171064	-7.73921	1.00034e-14	1.86926e-13
1345	Zm00001d013057	665.335	-1.32383	0.236286	-5.60265	2.11104e-08	2.03178e-07
1346	Zm00001d022147	360.265	-1.32213	0.274492	-4.81666	1.45978e-06	1.0313e-05
1347	Zm00001d010514	134.527	-1.32138	0.335365	-3.94013	8.14389e-05	0.000409088
1348	Zm00001d040730	570.517	-1.32117	0.276067	-4.78569	1.704e-06	1.19269e-05
1349	Zm00001d038760	48.6405	-1.32041	0.528551	-2.49818	0.0124834	0.0333357
1350	Zm00001d032999	152.231	-1.3198	0.452576	-2.91619	0.00354337	0.0113517
1351	Zm00001d013037	474.722	-1.31883	0.29594	-4.45643	8.33365e-06	5.10667e-05
1352	Zm00001d048138	6031.27	-1.31876	0.115305	-11.4372	2.72517e-30	1.36168e-28
1353	Zm00001d013012	2832.19	-1.3176	0.139503	-9.44496	3.55535e-21	1.10484e-19
1354	Zm00001d039866	1275.32	-1.31753	0.185026	-7.12078	1.07318e-12	1.6977e-11
1355	Zm00001d040310	288.672	-1.31731	0.24397	-5.39947	6.68369e-08	5.95994e-07
1356	Zm00001d021345	106.729	-1.31697	0.481176	-2.73697	0.00620072	0.0183912
1357	Zm00001d012894	198.942	-1.31602	0.298667	-4.4063	1.05152e-05	6.31049e-05
1358	Zm00001d048131	188.506	-1.31519	0.542268	-2.42536	0.0152933	0.0394326
1359	Zm00001d008211	103.951	-1.31486	0.398688	-3.29797	0.000973871	0.00369559
1360	Zm00001d011577	66.988	-1.3145	0.462254	-2.84367	0.00445967	0.0138586
1361	Zm00001d015686	357.601	-1.31444	0.264405	-4.97133	6.64954e-07	4.9866e-06
1362	Zm00001d042443	1102.32	-1.31377	0.176835	-7.4294	1.09093e-13	1.89058e-12
1363	Zm00001d006860	885.875	-1.31326	0.210782	-6.2304	4.65253e-10	5.60205e-09
1364	Zm00001d020968	47.2294	-1.31306	0.518298	-2.5334	0.0112962	0.0305865
1365	Zm00001d012746	391.624	-1.31195	0.215167	-6.09733	1.07853e-09	1.24006e-08
1366	Zm00001d052333	527.747	-1.31183	0.272025	-4.82247	1.41792e-06	1.00517e-05
1367	Zm00001d021653	1775.11	-1.31138	0.163267	-8.03209	9.58245e-16	1.94944e-14
1368	Zm00001d028011	1407.01	-1.31128	0.232265	-5.64562	1.64586e-08	1.61331e-07
1369	Zm00001d027846	76.5785	-1.31103	0.436416	-3.00409	0.00266376	0.00885294
1370	Zm00001d014191	326.983	-1.31063	0.245121	-5.34687	8.94904e-08	7.79305e-07
1371	Zm00001d025310	2028.27	-1.30949	0.194479	-6.73332	1.65835e-11	2.34683e-10
1372	Zm00001d029839	573.149	-1.30813	0.229445	-5.70128	1.18914e-08	1.18731e-07
1373	Zm00001d021069	80.639	-1.30605	0.442339	-2.9526	0.00315107	0.0102381
1374	Zm00001d032204	217.792	-1.30436	0.26556	-4.91174	9.0271e-07	6.62075e-06
1375	Zm00001d010201	745.707	-1.30435	0.204612	-6.37478	1.8322e-10	2.31293e-09
1376	Zm00001d041696	1218.67	-1.30411	0.15282	-8.53359	1.4187e-17	3.3735e-16
1377	Zm00001d018034	1852.63	-1.3038	0.267123	-4.8809	1.05605e-06	7.64408e-06
1378	Zm00001d005657	167.482	-1.30325	0.31685	-4.11315	3.90301e-05	0.000208968
1379	Zm00001d026113	205.44	-1.30321	0.326685	-3.98921	6.62928e-05	0.00033924
1380	Zm00001d041330	763.463	-1.30307	0.182035	-7.15834	8.16582e-13	1.30636e-11
1381	Zm00001d021784	971.952	-1.30269	0.204708	-6.36364	1.97032e-10	2.46943e-09
1382	Zm00001d023577	1997.05	-1.30267	0.185894	-7.00758	2.42476e-12	3.73934e-11
1383	Zm00001d050475	3100.45	-1.30221	0.15569	-8.36411	6.05679e-17	1.37398e-15
1384	Zm00001d007581	566.684	-1.29991	0.285451	-4.55389	5.26623e-06	3.3728e-05
1385	Zm00001d028676	794.537	-1.29983	0.220575	-5.89294	3.7939e-09	4.06349e-08
1386	Zm00001d006553	1112.21	-1.29913	0.209147	-6.21156	5.24619e-10	6.27028e-09
1387	Zm00001d021386	417.216	-1.29897	0.240553	-5.39992	6.6671e-08	5.94977e-07
1388	Zm00001d048219	139.296	-1.29781	0.363541	-3.56993	0.000357081	0.00152895
1389	Zm00001d023596	216.725	-1.29772	0.333438	-3.89194	9.94466e-05	0.000490103
1390	Zm00001d053563	1477.9	-1.29739	0.139936	-9.27126	1.83955e-20	5.44782e-19
1391	Zm00001d007477	895.961	-1.29679	0.161257	-8.04179	8.85339e-16	1.80611e-14
1392	Zm00001d052097	881.192	-1.29616	0.262605	-4.93577	7.98367e-07	5.90126e-06
1393	Zm00001d051936	72.0388	-1.29578	0.456584	-2.838	0.00453975	0.0140766
1394	Zm00001d047404	1020.94	-1.29546	0.155665	-8.3221	8.64215e-17	1.9315e-15
1395	Zm00001d035999	379.92	-1.29507	0.299195	-4.32852	1.50113e-05	8.76076e-05
1396	Zm00001d042800	79.6319	-1.2941	0.451556	-2.86586	0.00415882	0.0130506
1397	Zm00001d039680	86.2978	-1.29402	0.465689	-2.77871	0.00545752	0.0164852
1398	Zm00001d041715	965.535	-1.29178	0.193457	-6.67738	2.43259e-11	3.371e-10
1399	Zm00001d025665	363.356	-1.29156	0.2594	-4.97902	6.39056e-07	4.80828e-06
1400	Zm00001d026446	198.892	-1.29008	0.280512	-4.59901	4.24509e-06	2.77441e-05
1401	Zm00001d003412	103.278	-1.28973	0.415517	-3.10391	0.00190981	0.00665091
1402	Zm00001d028047	614.333	-1.28937	0.203734	-6.32868	2.47265e-10	3.07018e-09
1403	Zm00001d018871	122.353	-1.28871	0.38987	-3.30549	0.000948107	0.00361354
1404	Zm00001d052662	282.294	-1.28834	0.263002	-4.8986	9.6521e-07	7.03366e-06
1405	Zm00001d006158	976.913	-1.28775	0.236738	-5.43955	5.34145e-08	4.82368e-07
1406	Zm00001d013844	119.146	-1.28702	0.402639	-3.19646	0.00139127	0.00505217
1407	Zm00001d007802	3087.41	-1.28618	0.124761	-10.3091	6.40855e-25	2.47242e-23
1408	Zm00001d010144	92.2	-1.28545	0.466041	-2.75822	0.00581163	0.0173887
1409	Zm00001d012041	334.465	-1.2854	0.305463	-4.20803	2.57606e-05	0.000143688
1410	Zm00001d022164	705.235	-1.28532	0.207939	-6.18127	6.35893e-10	7.50142e-09
1411	Zm00001d004894	138.615	-1.28279	0.40812	-3.14318	0.00167124	0.00592377
1412	Zm00001d046696	86.8311	-1.28183	0.466611	-2.74711	0.00601238	0.0179085
1413	Zm00001d022528	132.421	-1.28178	0.3649	-3.51268	0.000443604	0.00185386
1414	Zm00001d037493	142.179	-1.28162	0.501172	-2.55724	0.0105505	0.0288813
1415	Zm00001d012339	87.4724	-1.281	0.389513	-3.28872	0.00100643	0.00380008
1416	Zm00001d026553	167.386	-1.28074	0.368244	-3.47797	0.000505231	0.00207856
1417	Zm00001d008628	267.485	-1.27991	0.268682	-4.76366	1.90117e-06	1.31829e-05
1418	Zm00001d042880	1117.9	-1.27939	0.293891	-4.35328	1.34114e-05	7.90843e-05
1419	Zm00001d038577	189.722	-1.27937	0.404581	-3.16221	0.00156575	0.00559973
1420	Zm00001d048116	120.353	-1.2777	0.431315	-2.96234	0.00305311	0.0099683
1421	Zm00001d045951	434.751	-1.27694	0.234873	-5.43673	5.42662e-08	4.8967e-07
1422	Zm00001d013162	1983.54	-1.27672	0.14645	-8.71778	2.83702e-18	7.1035e-17
1423	Zm00001d022618	221.716	-1.27663	0.31297	-4.07909	4.52121e-05	0.000238464
1424	Zm00001d017563	1904.33	-1.27618	0.152785	-8.35275	6.66927e-17	1.5084e-15
1425	Zm00001d029151	120.479	-1.27471	0.477053	-2.67206	0.0075388	0.0217746
1426	Zm00001d019966	125.325	-1.27399	0.496278	-2.56709	0.0102556	0.0281964
1427	Zm00001d007228	148.051	-1.27369	0.350405	-3.63489	0.000278097	0.00122284
1428	Zm00001d048092	2732.79	-1.27359	0.147951	-8.60821	7.42122e-18	1.79096e-16
1429	Zm00001d025752	769.392	-1.27288	0.241389	-5.27315	1.34101e-07	1.13468e-06
1430	Zm00001d005998	3009.19	-1.27248	0.174516	-7.29148	3.06566e-13	5.13244e-12
1431	Zm00001d013128	542.282	-1.27224	0.187192	-6.79646	1.07223e-11	1.54631e-10
1432	Zm00001d027370	259.43	-1.27192	0.275973	-4.60885	4.04899e-06	2.65543e-05
1433	Zm00001d054046	913.654	-1.27189	0.195702	-6.4991	8.08013e-11	1.06383e-09
1434	Zm00001d051804	6580.22	-1.27159	0.191654	-6.63482	3.24888e-11	4.42914e-10
1435	Zm00001d038913	60.0095	-1.2715	0.489147	-2.59943	0.00933796	0.0260491
1436	Zm00001d048785	107.266	-1.27054	0.467397	-2.71833	0.0065612	0.0193325
1437	Zm00001d029270	758.963	-1.26991	0.204073	-6.22281	4.88324e-10	5.87049e-09
1438	Zm00001d005114	1608.7	-1.26941	0.161748	-7.84808	4.22464e-15	8.21216e-14
1439	Zm00001d020042	1521.4	-1.26834	0.217914	-5.82038	5.87157e-09	6.12993e-08
1440	Zm00001d008042	68.2113	-1.26753	0.434144	-2.91962	0.00350463	0.011245
1441	Zm00001d036845	186.621	-1.267	0.346082	-3.66099	0.00025124	0.00111717
1442	Zm00001d020697	2021.29	-1.26682	0.145445	-8.70991	3.04103e-18	7.59756e-17
1443	Zm00001d011061	1348.69	-1.26672	0.148399	-8.53591	1.39052e-17	3.30996e-16
1444	Zm00001d044409	358.023	-1.26658	0.284373	-4.45394	8.43069e-06	5.15638e-05
1445	Zm00001d011168	1415.89	-1.26635	0.183611	-6.89691	5.31458e-12	7.92644e-11
1446	Zm00001d044988	740.383	-1.26618	0.220513	-5.74199	9.3571e-09	9.48038e-08
1447	Zm00001d053221	186.578	-1.26569	0.3217	-3.93437	8.34162e-05	0.000418095
1448	Zm00001d033234	786.474	-1.26502	0.257189	-4.91863	8.71527e-07	6.40447e-06
1449	Zm00001d012686	143.224	-1.26495	0.3231	-3.91503	9.03912e-05	0.000449677
1450	Zm00001d039378	221.819	-1.26453	0.329613	-3.83641	0.000124848	0.000600037
1451	Zm00001d020583	194.046	-1.2634	0.448333	-2.81801	0.0048323	0.0148497
1452	Zm00001d018003	76.345	-1.26271	0.432538	-2.9193	0.0035082	0.0112549
1453	Zm00001d049688	107.478	-1.26231	0.473398	-2.66649	0.00766481	0.0220767
1454	Zm00001d024722	2680.68	-1.26217	0.1703	-7.41143	1.24948e-13	2.15219e-12
1455	Zm00001d028118	1625.44	-1.26202	0.23842	-5.29328	1.20143e-07	1.02614e-06
1456	Zm00001d013527	66.5286	-1.26143	0.434392	-2.9039	0.00368552	0.0117358
1457	Zm00001d017068	283.46	-1.26083	0.244554	-5.15564	2.52767e-07	2.04203e-06
1458	Zm00001d052695	5186.31	-1.25956	0.142765	-8.8226	1.11834e-18	2.88289e-17
1459	Zm00001d051733	417.819	-1.25934	0.240754	-5.23082	1.68759e-07	1.40385e-06
1460	Zm00001d001907	1520.22	-1.25927	0.199616	-6.30843	2.81873e-10	3.47327e-09
1461	Zm00001d012232	512.173	-1.25896	0.355969	-3.53672	0.000405122	0.00170816
1462	Zm00001d035605	124.168	-1.25875	0.361313	-3.48383	0.0004943	0.00203913
1463	Zm00001d053252	58.8554	-1.25804	0.505279	-2.4898	0.0127815	0.0339956
1464	Zm00001d012308	2583.02	-1.25803	0.151101	-8.32577	8.37812e-17	1.87619e-15
1465	Zm00001d024016	1040.68	-1.25739	0.161712	-7.77549	7.51535e-15	1.42547e-13
1466	Zm00001d019403	128.156	-1.25696	0.44654	-2.81488	0.00487952	0.0149745
1467	Zm00001d035589	503.182	-1.25642	0.263095	-4.77556	1.79212e-06	1.24936e-05
1468	Zm00001d032808	2143.17	-1.25639	0.154267	-8.14424	3.81675e-16	8.03182e-15
1469	Zm00001d016884	1063.32	-1.25386	0.22477	-5.57844	2.42689e-08	2.31514e-07
1470	Zm00001d040051	2260.47	-1.25352	0.174082	-7.20073	5.98931e-13	9.71175e-12
1471	Zm00001d034564	299.415	-1.25264	0.32079	-3.90486	9.42793e-05	0.000467379
1472	Zm00001d025539	239.782	-1.2524	0.331334	-3.77988	0.000156906	0.000736328
1473	Zm00001d023923	60.237	-1.25137	0.457962	-2.73248	0.00628596	0.0186134
1474	Zm00001d001823	97.7903	-1.25102	0.397901	-3.14404	0.00166631	0.00590998
1475	Zm00001d015012	1334.57	-1.25056	0.151557	-8.25142	1.56519e-16	3.401e-15
1476	Zm00001d041298	132.269	-1.2495	0.444749	-2.80944	0.00496278	0.015189
1477	Zm00001d033315	1559.3	-1.24949	0.172222	-7.25512	4.01318e-13	6.6355e-12
1478	Zm00001d011152	1149.53	-1.24907	0.209105	-5.97339	2.3238e-09	2.56273e-08
1479	Zm00001d051139	4921.51	-1.24863	0.436906	-2.8579	0.00426453	0.0133417
1480	Zm00001d025807	441.388	-1.24848	0.220968	-5.65004	1.6041e-08	1.57596e-07
1481	Zm00001d023568	85.688	-1.24831	0.381116	-3.2754	0.00105513	0.00395042
1482	Zm00001d015497	14071.8	-1.24705	0.176378	-7.07032	1.54575e-12	2.42123e-11
1483	Zm00001d051799	187.241	-1.24687	0.348866	-3.57406	0.000351492	0.00150758
1484	Zm00001d007400	145.774	-1.24676	0.337482	-3.69428	0.000220507	0.000995461
1485	Zm00001d040580	89.2915	-1.24662	0.394769	-3.15784	0.00158944	0.00566417
1486	Zm00001d008245	4169.04	-1.24597	0.139187	-8.95178	3.49786e-19	9.37931e-18
1487	Zm00001d024058	328.007	-1.24505	0.217729	-5.71835	1.07561e-08	1.08157e-07
1488	Zm00001d038459	1290.4	-1.24245	0.193703	-6.41422	1.41541e-10	1.80996e-09
1489	Zm00001d011760	98.3263	-1.24226	0.378992	-3.27779	0.00104623	0.0039253
1490	Zm00001d031148	121.091	-1.23968	0.387944	-3.19551	0.00139584	0.00506555
1491	Zm00001d021521	417.111	-1.23859	0.224808	-5.50955	3.59761e-08	3.34748e-07
1492	Zm00001d053991	497.208	-1.23778	0.23969	-5.16407	2.41635e-07	1.95977e-06
1493	Zm00001d013033	263.32	-1.23772	0.279572	-4.4272	9.54652e-06	5.77501e-05
1494	Zm00001d008720	1132.17	-1.23697	0.194384	-6.36352	1.97177e-10	2.46988e-09
1495	Zm00001d007420	1880.52	-1.23671	0.170679	-7.24581	4.29847e-13	7.0814e-12
1496	Zm00001d026521	694.797	-1.23598	0.1797	-6.87803	6.06864e-12	8.99197e-11
1497	Zm00001d025822	761.224	-1.23597	0.216642	-5.70515	1.16243e-08	1.16217e-07
1498	Zm00001d002625	410.407	-1.23535	0.262019	-4.71473	2.42029e-06	1.65126e-05
1499	Zm00001d039098	63.0688	-1.23498	0.526834	-2.34416	0.0190699	0.0475229
1500	Zm00001d046029	96.2822	-1.2344	0.405498	-3.04416	0.00233329	0.00790198
1501	Zm00001d048444	74.0036	-1.23427	0.470531	-2.62315	0.00871216	0.0246213
1502	Zm00001d005459	1223.3	-1.23348	0.220344	-5.598	2.16836e-08	2.079e-07
1503	Zm00001d030561	659.316	-1.23348	0.201463	-6.12261	9.20541e-10	1.06816e-08
1504	Zm00001d031543	12129.4	-1.23294	0.164353	-7.5018	6.29494e-14	1.11043e-12
1505	Zm00001d011680	2798.27	-1.23253	0.135943	-9.06648	1.22927e-19	3.38834e-18
1506	Zm00001d053569	731.805	-1.23227	0.242061	-5.09076	3.56635e-07	2.81205e-06
1507	Zm00001d034634	2595.92	-1.23119	0.183257	-6.71842	1.83705e-11	2.57561e-10
1508	Zm00001d005661	96.5223	-1.23093	0.42437	-2.90061	0.00372435	0.0118395
1509	Zm00001d014549	1119.61	-1.23075	0.164043	-7.50261	6.25607e-14	1.10443e-12
1510	Zm00001d027177	588.488	-1.23	0.186207	-6.60555	3.96044e-11	5.34778e-10
1511	Zm00001d011775	815.369	-1.22904	0.164398	-7.47599	7.66228e-14	1.34535e-12
1512	Zm00001d038306	1417.98	-1.22834	0.147706	-8.3161	9.09013e-17	2.02563e-15
1513	Zm00001d047883	360.814	-1.22828	0.232126	-5.29146	1.21346e-07	1.03564e-06
1514	Zm00001d006684	92.881	-1.22797	0.463181	-2.65117	0.00802134	0.0229405
1515	Zm00001d023259	1100	-1.22722	0.194099	-6.32264	2.57132e-10	3.18746e-09
1516	Zm00001d052471	115.427	-1.22698	0.363515	-3.37532	0.000737299	0.00289643
1517	Zm00001d044291	85.9084	-1.22688	0.46589	-2.63341	0.00845334	0.0240035
1518	Zm00001d026572	143.398	-1.2257	0.406123	-3.01804	0.00254413	0.00849853
1519	Zm00001d006861	1955.79	-1.22218	0.217828	-5.61075	2.01453e-08	1.94964e-07
1520	Zm00001d005497	1398.56	-1.22132	0.141128	-8.654	4.97261e-18	1.22214e-16
1521	Zm00001d034635	5308.88	-1.2212	0.142041	-8.59753	8.14534e-18	1.96363e-16
1522	Zm00001d053808	3158.63	-1.22099	0.142645	-8.55962	1.13244e-17	2.707e-16
1523	Zm00001d018802	193.04	-1.22077	0.447997	-2.72495	0.00643112	0.0189911
1524	Zm00001d006106	1482.6	-1.22071	0.200995	-6.07335	1.25273e-09	1.42876e-08
1525	Zm00001d033005	332.979	-1.22052	0.284795	-4.28562	1.82233e-05	0.000104551
1526	Zm00001d023336	57.868	-1.2203	0.521021	-2.34212	0.0191744	0.047736
1527	Zm00001d000294	1845.68	-1.22024	0.205999	-5.92353	3.15094e-09	3.40701e-08
1528	Zm00001d021263	9444.95	-1.21958	0.217431	-5.60906	2.03426e-08	1.96608e-07
1529	Zm00001d025503	341.633	-1.21874	0.28156	-4.32853	1.5011e-05	8.76076e-05
1530	Zm00001d032152	1656.62	-1.21786	0.167681	-7.26297	3.78695e-13	6.28894e-12
1531	Zm00001d048829	3052.28	-1.21757	0.19281	-6.31483	2.70456e-10	3.34349e-09
1532	Zm00001d020382	637.134	-1.21753	0.235752	-5.16446	2.41131e-07	1.95638e-06
1533	Zm00001d031833	15737.8	-1.21717	0.185685	-6.55505	5.56237e-11	7.44878e-10
1534	Zm00001d021448	3221.59	-1.21714	0.150892	-8.06631	7.24577e-16	1.48886e-14
1535	Zm00001d043800	277.744	-1.21702	0.343391	-3.54412	0.000393932	0.00166412
1536	Zm00001d028899	72.8386	-1.21654	0.454814	-2.6748	0.00747746	0.0216332
1537	Zm00001d041222	329.12	-1.21564	0.271966	-4.46983	7.8283e-06	4.82437e-05
1538	Zm00001d008454	941.305	-1.21498	0.162621	-7.47124	7.94444e-14	1.39058e-12
1539	Zm00001d011895	215.587	-1.21439	0.318749	-3.80985	0.000139051	0.000660878
1540	Zm00001d027812	22943.2	-1.21341	0.118459	-10.2433	1.26771e-24	4.84958e-23
1541	Zm00001d033187	1991.21	-1.213	0.214462	-5.65601	1.54936e-08	1.52482e-07
1542	Zm00001d024041	5544.39	-1.21216	0.198019	-6.12144	9.27363e-10	1.07552e-08
1543	Zm00001d052985	923.395	-1.21195	0.198699	-6.09943	1.06444e-09	1.22511e-08
1544	Zm00001d046831	1515.51	-1.21129	0.146624	-8.26123	1.44178e-16	3.13583e-15
1545	Zm00001d039554	285.355	-1.21112	0.301261	-4.02016	5.81587e-05	0.000300942
1546	Zm00001d018940	110.821	-1.21065	0.389604	-3.10737	0.00188759	0.00658667
1547	Zm00001d039313	851.836	-1.21001	0.217916	-5.55267	2.8134e-08	2.66036e-07
1548	Zm00001d026453	55.351	-1.20896	0.51906	-2.32913	0.0198521	0.0491482
1549	Zm00001d033310	103.429	-1.20805	0.418446	-2.887	0.00388934	0.0122989
1550	Zm00001d020655	75.7654	-1.20743	0.461464	-2.61652	0.00888324	0.0249989
1551	Zm00001d041965	246.995	-1.20704	0.284406	-4.24408	2.19497e-05	0.000124234
1552	Zm00001d047055	1217.25	-1.20657	0.236089	-5.11069	3.20986e-07	2.55046e-06
1553	Zm00001d025846	436.248	-1.20642	0.205144	-5.88088	4.08101e-09	4.34841e-08
1554	Zm00001d003280	776.239	-1.20633	0.272383	-4.42879	9.47623e-06	5.73708e-05
1555	Zm00001d001835	73.3493	-1.20587	0.45806	-2.63256	0.00847451	0.0240516
1556	Zm00001d019956	307.371	-1.2053	0.253153	-4.76115	1.92494e-06	1.33376e-05
1557	Zm00001d026551	300.886	-1.2049	0.247531	-4.86768	1.12915e-06	8.12908e-06
1558	Zm00001d037778	339.225	-1.20485	0.262464	-4.59052	4.42134e-06	2.87916e-05
1559	Zm00001d022050	1746.79	-1.20469	0.145528	-8.27811	1.25149e-16	2.743e-15
1560	Zm00001d016052	617.105	-1.20309	0.219073	-5.49174	3.97986e-08	3.67453e-07
1561	Zm00001d047726	1005.64	-1.20278	0.239926	-5.01312	5.35558e-07	4.08786e-06
1562	Zm00001d013945	1366.99	-1.20207	0.266647	-4.5081	6.5411e-06	4.10583e-05
1563	Zm00001d033046	2126.58	-1.20185	0.139151	-8.63702	5.76978e-18	1.415e-16
1564	Zm00001d031837	3660.04	-1.2017	0.151446	-7.93482	2.10795e-15	4.17632e-14
1565	Zm00001d006261	155.285	-1.20087	0.316096	-3.79909	0.000145231	0.000688088
1566	Zm00001d018403	4542.99	-1.20087	0.144485	-8.31143	9.45558e-17	2.10088e-15
1567	Zm00001d013425	75.7905	-1.20001	0.486381	-2.46723	0.0136164	0.0357842
1568	Zm00001d021435	5844.05	-1.19888	0.216422	-5.53955	3.03243e-08	2.8532e-07
1569	Zm00001d032613	71.6768	-1.19857	0.433177	-2.76693	0.00565862	0.0170021
1570	Zm00001d040986	2309.77	-1.19719	0.144504	-8.28479	1.18322e-16	2.60091e-15
1571	Zm00001d021491	88.1895	-1.19694	0.427373	-2.8007	0.00509927	0.0155417
1572	Zm00001d012766	574.584	-1.19636	0.287704	-4.15829	3.20644e-05	0.000174935
1573	Zm00001d034469	337.82	-1.19607	0.280533	-4.26358	2.0118e-05	0.000114581
1574	Zm00001d042872	315.996	-1.19524	0.294322	-4.06101	4.88617e-05	0.000256166
1575	Zm00001d028410	3800.21	-1.19521	0.189202	-6.31711	2.66497e-10	3.29813e-09
1576	Zm00001d041332	100.029	-1.19344	0.468522	-2.54725	0.0108575	0.0295931
1577	Zm00001d049355	1341.07	-1.19318	0.141403	-8.43813	3.22458e-17	7.50252e-16
1578	Zm00001d014875	90.195	-1.19309	0.489923	-2.43526	0.0148811	0.0385539
1579	Zm00001d017190	141.311	-1.19302	0.369648	-3.22746	0.00124896	0.00458978
1580	Zm00001d004426	340.431	-1.1927	0.230269	-5.1796	2.22368e-07	1.81584e-06
1581	Zm00001d019218	262.953	-1.19254	0.247781	-4.81288	1.48769e-06	1.05004e-05
1582	Zm00001d044132	413.647	-1.19213	0.254628	-4.68184	2.84316e-06	1.91671e-05
1583	Zm00001d038480	708.365	-1.1914	0.197619	-6.02873	1.65249e-09	1.85211e-08
1584	Zm00001d031451	8833.9	-1.19019	0.145226	-8.19545	2.49665e-16	5.30304e-15
1585	Zm00001d043361	706.27	-1.19018	0.222357	-5.35257	8.67143e-08	7.58918e-07
1586	Zm00001d020418	144.798	-1.19012	0.435767	-2.73109	0.00631256	0.0186824
1587	Zm00001d022420	165.469	-1.18987	0.350915	-3.39078	0.000696937	0.00275772
1588	Zm00001d031894	3232.4	-1.18984	0.144667	-8.22466	1.95751e-16	4.21298e-15
1589	Zm00001d011635	219.778	-1.18937	0.307144	-3.87234	0.000107796	0.000524979
1590	Zm00001d011459	79.8659	-1.18715	0.495376	-2.39646	0.0165545	0.0421858
1591	Zm00001d008968	112.965	-1.18685	0.461186	-2.57347	0.0100685	0.0277626
1592	Zm00001d026131	1028.47	-1.18637	0.21746	-5.45559	4.88104e-08	4.43793e-07
1593	Zm00001d049161	206.219	-1.18606	0.379377	-3.12633	0.00177006	0.00623022
1594	Zm00001d012883	359.947	-1.18553	0.260465	-4.55159	5.3243e-06	3.40518e-05
1595	Zm00001d048684	4651.98	-1.18468	0.128007	-9.25486	2.14502e-20	6.2868e-19
1596	Zm00001d011941	3200.61	-1.18377	0.163246	-7.25147	4.12272e-13	6.80174e-12
1597	Zm00001d034423	2088.32	-1.18288	0.157498	-7.51047	5.89164e-14	1.04334e-12
1598	Zm00001d000065	198.197	-1.18283	0.301485	-3.92336	8.73243e-05	0.000436333
1599	Zm00001d027593	479.87	-1.18265	0.251761	-4.69749	2.63374e-06	1.78614e-05
1600	Zm00001d028591	61.3741	-1.1826	0.493868	-2.39457	0.0166397	0.0423792
1601	Zm00001d009667	329.539	-1.18255	0.304158	-3.88796	0.000101092	0.00049724
1602	Zm00001d047945	584.468	-1.18241	0.222828	-5.30639	1.1182e-07	9.61213e-07
1603	Zm00001d021192	1480.81	-1.18028	0.161562	-7.30547	2.76306e-13	4.64641e-12
1604	Zm00001d013125	1189.82	-1.18012	0.203335	-5.80384	6.48135e-09	6.70223e-08
1605	Zm00001d021341	592.766	-1.17939	0.277209	-4.25452	2.09499e-05	0.000118961
1606	Zm00001d015605	1240.06	-1.17805	0.19915	-5.9154	3.31075e-09	3.57353e-08
1607	Zm00001d050403	372.891	-1.17805	0.440838	-2.67228	0.0075337	0.0217626
1608	Zm00001d051418	274.069	-1.17727	0.280226	-4.20114	2.65577e-05	0.000147518
1609	Zm00001d039280	3359.02	-1.17691	0.159634	-7.37256	1.67381e-13	2.85707e-12
1610	Zm00001d039769	1707.18	-1.17653	0.21023	-5.59642	2.18819e-08	2.09625e-07
1611	Zm00001d000434	66.2028	-1.17618	0.468916	-2.50829	0.0121318	0.032523
1612	Zm00001d045021	1573.5	-1.17616	0.1703	-6.90644	4.96968e-12	7.4414e-11
1613	Zm00001d023343	1756.01	-1.17562	0.258382	-4.54993	5.36631e-06	3.42915e-05
1614	Zm00001d012069	141.66	-1.17547	0.411558	-2.85613	0.00428835	0.013407
1615	Zm00001d045136	311.977	-1.17539	0.217563	-5.40254	6.57022e-08	5.87312e-07
1616	Zm00001d033407	883.403	-1.17509	0.220709	-5.32416	1.01421e-07	8.76136e-07
1617	Zm00001d029464	852.367	-1.17462	0.208083	-5.64495	1.65226e-08	1.61768e-07
1618	Zm00001d030950	673.464	-1.17338	0.181197	-6.47572	9.43633e-11	1.23237e-09
1619	Zm00001d002000	4555.26	-1.17108	0.126632	-9.24794	2.28868e-20	6.69056e-19
1620	Zm00001d004672	151.174	-1.17041	0.373042	-3.13748	0.00170407	0.00602226
1621	Zm00001d018936	1215.56	-1.17036	0.160818	-7.27755	3.3993e-13	5.67426e-12
1622	Zm00001d003392	327.618	-1.17016	0.247912	-4.72006	2.35775e-06	1.61101e-05
1623	Zm00001d023543	556.89	-1.16963	0.285886	-4.09125	4.29062e-05	0.000226989
1624	Zm00001d036847	172.457	-1.1686	0.334021	-3.49859	0.000467731	0.0019426
1625	Zm00001d026192	1766.18	-1.16819	0.174467	-6.69576	2.14556e-11	2.98785e-10
1626	Zm00001d006902	154.279	-1.16766	0.312028	-3.74217	0.000182441	0.000843765
1627	Zm00001d034025	2629.59	-1.16738	0.141161	-8.26986	1.34119e-16	2.92546e-15
1628	Zm00001d018947	127.19	-1.16601	0.435702	-2.67616	0.00744708	0.0215563
1629	Zm00001d011223	2566	-1.16472	0.145282	-8.01696	1.08392e-15	2.18956e-14
1630	Zm00001d052362	1082.7	-1.16436	0.196541	-5.92429	3.13659e-09	3.39473e-08
1631	Zm00001d023950	285.698	-1.16301	0.273368	-4.25437	2.0964e-05	0.000118981
1632	Zm00001d039715	293.351	-1.16235	0.236046	-4.92425	8.46851e-07	6.23728e-06
1633	Zm00001d036463	88.9292	-1.16229	0.410258	-2.83307	0.00461039	0.0142586
1634	Zm00001d018631	2355.02	-1.16088	0.165819	-7.00088	2.54369e-12	3.91741e-11
1635	Zm00001d052318	445.826	-1.16074	0.242318	-4.79014	1.66663e-06	1.1687e-05
1636	Zm00001d032094	397.959	-1.15906	0.250299	-4.63071	3.64411e-06	2.408e-05
1637	Zm00001d048504	249.102	-1.15867	0.288417	-4.01736	5.88539e-05	0.000304123
1638	Zm00001d004840	181.06	-1.15851	0.318259	-3.64015	0.000272474	0.00120021
1639	Zm00001d008312	92.2489	-1.15831	0.391995	-2.95491	0.00312764	0.010178
1640	Zm00001d024004	2017.57	-1.15784	0.212728	-5.44283	5.24394e-08	4.74317e-07
1641	Zm00001d008681	861.402	-1.15733	0.275036	-4.20791	2.57746e-05	0.000143731
1642	Zm00001d021596	2662.7	-1.15643	0.210326	-5.49826	3.83553e-08	3.55284e-07
1643	Zm00001d051505	421.166	-1.15581	0.24707	-4.67808	2.89578e-06	1.94755e-05
1644	Zm00001d029947	313.951	-1.15567	0.26185	-4.41349	1.01717e-05	6.11732e-05
1645	Zm00001d032481	741.564	-1.15305	0.249931	-4.61348	3.95983e-06	2.60147e-05
1646	Zm00001d028386	1935.24	-1.15283	0.148401	-7.76834	7.95183e-15	1.50073e-13
1647	Zm00001d040672	5985.18	-1.15047	0.179141	-6.42216	1.34352e-10	1.7258e-09
1648	Zm00001d026111	28856.3	-1.14968	0.114736	-10.0202	1.24209e-23	4.53004e-22
1649	Zm00001d024778	262.127	-1.14935	0.473965	-2.42497	0.0153098	0.0394707
1650	Zm00001d022525	1643.15	-1.14698	0.196919	-5.82462	5.7242e-09	5.98955e-08
1651	Zm00001d027987	4471.18	-1.14682	0.131182	-8.74222	2.28583e-18	5.76156e-17
1652	Zm00001d038989	371.427	-1.14653	0.240373	-4.76981	1.84402e-06	1.28278e-05
1653	Zm00001d009552	1934.7	-1.14621	0.149558	-7.66395	1.80295e-14	3.30906e-13
1654	Zm00001d051553	1445.43	-1.14536	0.141377	-8.10146	5.43032e-16	1.12912e-14
1655	Zm00001d042749	179.922	-1.1446	0.355232	-3.22212	0.00127245	0.00466703
1656	Zm00001d013225	2698.03	-1.14428	0.123081	-9.29692	1.44569e-20	4.30952e-19
1657	Zm00001d024861	1719.32	-1.14401	0.153427	-7.45636	8.89425e-14	1.55205e-12
1658	Zm00001d020198	212.015	-1.14393	0.405835	-2.81872	0.00482161	0.0148289
1659	Zm00001d020093	860.956	-1.14348	0.188948	-6.05182	1.43218e-09	1.6196e-08
1660	Zm00001d026331	5196.2	-1.14318	0.13253	-8.62579	6.36505e-18	1.5476e-16
1661	Zm00001d022617	208.62	-1.14283	0.267152	-4.27785	1.88708e-05	0.000107788
1662	Zm00001d026368	1302.38	-1.14221	0.185136	-6.16958	6.84702e-10	8.04374e-09
1663	Zm00001d046676	505.399	-1.14217	0.286094	-3.9923	6.54348e-05	0.000335152
1664	Zm00001d043539	1139.92	-1.14169	0.15192	-7.51509	5.68729e-14	1.00873e-12
1665	Zm00001d003039	171.317	-1.14166	0.320043	-3.5672	0.000360821	0.00154176
1666	Zm00001d036702	576.371	-1.14151	0.188355	-6.06044	1.35754e-09	1.53979e-08
1667	Zm00001d014880	4260.96	-1.14143	0.145184	-7.86198	3.78097e-15	7.36235e-14
1668	Zm00001d008540	2590.38	-1.14137	0.17929	-6.36608	1.93926e-10	2.43723e-09
1669	Zm00001d034026	1136.35	-1.14099	0.196106	-5.81821	5.94796e-09	6.2008e-08
1670	Zm00001d006257	1259.05	-1.14035	0.184815	-6.17023	6.81918e-10	8.01519e-09
1671	Zm00001d020686	374.977	-1.1402	0.222705	-5.11976	3.05929e-07	2.44366e-06
1672	Zm00001d008251	654.291	-1.13985	0.206012	-5.53296	3.14877e-08	2.95653e-07
1673	Zm00001d039971	2428.98	-1.139	0.135537	-8.40359	4.33025e-17	9.94248e-16
1674	Zm00001d037958	530.969	-1.13851	0.228267	-4.98762	6.11288e-07	4.61313e-06
1675	Zm00001d029356	122.525	-1.13739	0.424866	-2.67705	0.00742727	0.02151
1676	Zm00001d012239	1345.74	-1.13678	0.214194	-5.30725	1.11292e-07	9.57038e-07
1677	Zm00001d038864	1006.27	-1.13655	0.159102	-7.14352	9.097e-13	1.4492e-11
1678	Zm00001d034368	6309.62	-1.13591	0.434227	-2.61593	0.0088986	0.0250328
1679	Zm00001d042596	1018.43	-1.13575	0.183059	-6.20431	5.49369e-10	6.54894e-09
1680	Zm00001d020763	1035.99	-1.13549	0.217305	-5.22532	1.73856e-07	1.44308e-06
1681	Zm00001d042634	1497.34	-1.13542	0.145127	-7.82359	5.13377e-15	9.86945e-14
1682	Zm00001d002384	1792.57	-1.1354	0.161556	-7.02788	2.09696e-12	3.26042e-11
1683	Zm00001d019163	737.048	-1.13515	0.317157	-3.57914	0.000344728	0.00148249
1684	Zm00001d016512	2271.56	-1.13442	0.186616	-6.0789	1.21011e-09	1.38155e-08
1685	Zm00001d026053	138.61	-1.13437	0.356481	-3.18213	0.00146198	0.00527584
1686	Zm00001d038146	1790.1	-1.13404	0.239577	-4.73352	2.20658e-06	1.51548e-05
1687	Zm00001d030464	155.936	-1.13319	0.338915	-3.34358	0.000827043	0.00320435
1688	Zm00001d001941	1469.6	-1.13291	0.161949	-6.99552	2.64285e-12	4.06185e-11
1689	Zm00001d049292	76.0581	-1.13165	0.459225	-2.46426	0.0137296	0.0360356
1690	Zm00001d044076	61.8339	-1.13165	0.443191	-2.55341	0.0106673	0.0291305
1691	Zm00001d048147	2424.98	-1.13163	0.147831	-7.65486	1.93529e-14	3.54334e-13
1692	Zm00001d041753	1668.9	-1.13143	0.164405	-6.88195	5.90404e-12	8.77101e-11
1693	Zm00001d038809	4086.31	-1.131	0.126574	-8.93547	4.05463e-19	1.0783e-17
1694	Zm00001d033516	5684.27	-1.13063	0.120975	-9.34596	9.10558e-21	2.75414e-19
1695	Zm00001d015385	2069.69	-1.13024	0.253929	-4.45101	8.54688e-06	5.22041e-05
1696	Zm00001d041746	2747.41	-1.13002	0.134994	-8.37085	5.7203e-17	1.29895e-15
1697	Zm00001d012285	1111.78	-1.12998	0.26398	-4.28055	1.86433e-05	0.000106691
1698	Zm00001d011288	2598.45	-1.12958	0.148649	-7.59897	2.98494e-14	5.39978e-13
1699	Zm00001d012962	494.23	-1.12863	0.241533	-4.67279	2.9713e-06	1.99538e-05
1700	Zm00001d018792	262.487	-1.12849	0.322844	-3.49545	0.000473261	0.00196269
1701	Zm00001d040027	9175.71	-1.128	0.226258	-4.98546	6.18158e-07	4.66033e-06
1702	Zm00001d045885	514.347	-1.12765	0.213314	-5.28635	1.24784e-07	1.06179e-06
1703	Zm00001d005811	86.9679	-1.12714	0.432413	-2.60663	0.00914369	0.0255985
1704	Zm00001d025392	455.428	-1.12684	0.194303	-5.79937	6.6564e-09	6.8699e-08
1705	Zm00001d037489	6906.79	-1.12583	0.117864	-9.55197	1.27257e-21	4.10644e-20
1706	Zm00001d029468	138.395	-1.12558	0.388071	-2.90044	0.00372643	0.0118445
1707	Zm00001d036704	237.944	-1.12531	0.287797	-3.91007	9.22685e-05	0.000458011
1708	Zm00001d035401	147.842	-1.12447	0.328233	-3.42584	0.000612899	0.00246518
1709	Zm00001d043447	80.0271	-1.12418	0.471823	-2.38263	0.0171893	0.043554
1710	Zm00001d017382	775.242	-1.12417	0.242157	-4.64232	3.44524e-06	2.28658e-05
1711	Zm00001d041861	459.241	-1.12381	0.24529	-4.58156	4.61516e-06	2.99043e-05
1712	Zm00001d007882	100.778	-1.12355	0.364934	-3.07876	0.00207862	0.00714989
1713	Zm00001d018394	729.515	-1.12353	0.17648	-6.36634	1.93596e-10	2.43444e-09
1714	Zm00001d032079	796.854	-1.1228	0.201375	-5.57566	2.46594e-08	2.34745e-07
1715	Zm00001d018917	463.33	-1.12235	0.252887	-4.43816	9.07332e-06	5.51819e-05
1716	Zm00001d006601	2706.81	-1.12204	0.176297	-6.36448	1.9595e-10	2.45741e-09
1717	Zm00001d003492	803.252	-1.1217	0.211203	-5.31097	1.09041e-07	9.39101e-07
1718	Zm00001d035186	3438.98	-1.12151	0.124879	-8.98079	2.68826e-19	7.25127e-18
1719	Zm00001d039918	1576.16	-1.1213	0.162836	-6.88612	5.73364e-12	8.53462e-11
1720	Zm00001d040834	3292.54	-1.12049	0.211981	-5.28582	1.25144e-07	1.06445e-06
1721	Zm00001d016920	1460.58	-1.12008	0.148383	-7.5486	4.39957e-14	7.85861e-13
1722	Zm00001d025827	634.194	-1.11942	0.197024	-5.68165	1.33405e-08	1.32095e-07
1723	Zm00001d025899	284.473	-1.11822	0.303361	-3.68609	0.000227724	0.00102417
1724	Zm00001d017867	73.7679	-1.11795	0.459035	-2.43543	0.0148739	0.0385397
1725	Zm00001d011655	125.959	-1.1174	0.32699	-3.41723	0.000632628	0.00253688
1726	Zm00001d042932	560.963	-1.11662	0.207928	-5.37021	7.86469e-08	6.92856e-07
1727	Zm00001d011563	2653.59	-1.1157	0.160373	-6.95692	3.47794e-12	5.26683e-11
1728	Zm00001d008296	288.604	-1.1151	0.397108	-2.80805	0.00498422	0.0152422
1729	Zm00001d044246	54014.7	-1.11367	0.184518	-6.03556	1.58414e-09	1.78079e-08
1730	Zm00001d020694	2167.98	-1.11346	0.164606	-6.7644	1.33864e-11	1.91349e-10
1731	Zm00001d012092	3551.91	-1.11331	0.132218	-8.42024	3.75729e-17	8.68851e-16
1732	Zm00001d048492	337.309	-1.11257	0.257469	-4.32119	1.55187e-05	9.02671e-05
1733	Zm00001d032249	250.645	-1.11245	0.285291	-3.89936	9.64478e-05	0.000476982
1734	Zm00001d048021	16938.4	-1.11062	0.181677	-6.11318	9.76671e-10	1.1304e-08
1735	Zm00001d049081	130.517	-1.11043	0.389383	-2.85175	0.00434786	0.0135669
1736	Zm00001d003386	555.028	-1.11038	0.28614	-3.88055	0.00010422	0.000510193
1737	Zm00001d043924	218.101	-1.11	0.30025	-3.69691	0.000218238	0.000987973
1738	Zm00001d021512	1347.58	-1.10947	0.143157	-7.74998	9.19083e-15	1.72737e-13
1739	Zm00001d047437	181.378	-1.10925	0.31735	-3.49537	0.000473412	0.00196296
1740	Zm00001d006034	1552.55	-1.10843	0.171708	-6.45533	1.07986e-10	1.40382e-09
1741	Zm00001d002052	5836.02	-1.10839	0.125179	-8.85444	8.41079e-19	2.18806e-17
1742	Zm00001d000358	240.592	-1.10839	0.32823	-3.37687	0.000733154	0.00288443
1743	Zm00001d050294	93.9828	-1.108	0.434728	-2.54873	0.0108115	0.0294888
1744	Zm00001d044405	5246.07	-1.10742	0.141967	-7.80052	6.16526e-15	1.17627e-13
1745	Zm00001d031569	38701.2	-1.10725	0.215622	-5.13512	2.81958e-07	2.26655e-06
1746	Zm00001d023695	1662.06	-1.10648	0.160093	-6.9115	4.79563e-12	7.18552e-11
1747	Zm00001d007949	1795.56	-1.10638	0.165309	-6.69284	2.18878e-11	3.04244e-10
1748	Zm00001d028055	909.558	-1.10502	0.198197	-5.57536	2.47015e-08	2.35047e-07
1749	Zm00001d031949	89.5873	-1.10465	0.423306	-2.60958	0.00906538	0.0254075
1750	Zm00001d013713	1684.9	-1.10457	0.132606	-8.32973	8.10283e-17	1.81813e-15
1751	Zm00001d039267	548.369	-1.10445	0.26839	-4.11511	3.86992e-05	0.000207392
1752	Zm00001d053665	886.302	-1.10402	0.196303	-5.62403	1.86553e-08	1.81318e-07
1753	Zm00001d034711	1212.12	-1.10345	0.233814	-4.71933	2.36628e-06	1.61635e-05
1754	Zm00001d048718	7593.56	-1.1034	0.128688	-8.57422	9.97572e-18	2.39724e-16
1755	Zm00001d043510	187.515	-1.10282	0.317467	-3.47382	0.00051311	0.0021041
1756	Zm00001d008389	334.527	-1.10216	0.243885	-4.51919	6.20766e-06	3.91495e-05
1757	Zm00001d046950	108.495	-1.10001	0.441981	-2.48881	0.0128171	0.0340663
1758	Zm00001d043314	2320.3	-1.09997	0.187204	-5.87576	4.20914e-09	4.47443e-08
1759	Zm00001d050831	695.799	-1.09994	0.252937	-4.34868	1.36959e-05	8.058e-05
1760	Zm00001d019552	7289.04	-1.09962	0.133563	-8.23294	1.82671e-16	3.94281e-15
1761	Zm00001d012738	1569.4	-1.09866	0.165611	-6.63399	3.2673e-11	4.45157e-10
1762	Zm00001d023183	231.935	-1.09811	0.274783	-3.99627	6.4347e-05	0.000330177
1763	Zm00001d028642	514.844	-1.09786	0.277591	-3.95495	7.65519e-05	0.00038625
1764	Zm00001d051611	139.403	-1.09753	0.41971	-2.61498	0.00892325	0.0250887
1765	Zm00001d011246	157.937	-1.09743	0.344673	-3.18396	0.00145274	0.00524838
1766	Zm00001d007382	347.222	-1.09732	0.247212	-4.43877	9.04732e-06	5.50532e-05
1767	Zm00001d045157	1137.68	-1.09714	0.204932	-5.35369	8.61765e-08	7.55085e-07
1768	Zm00001d002708	95.7202	-1.09709	0.447417	-2.45207	0.0142039	0.0370916
1769	Zm00001d032938	191.311	-1.09702	0.322574	-3.40083	0.000671817	0.00267325
1770	Zm00001d041491	1100.65	-1.09677	0.201319	-5.44792	5.09627e-08	4.61882e-07
1771	Zm00001d021132	3265.35	-1.09561	0.139716	-7.84168	4.44544e-15	8.58985e-14
1772	Zm00001d017191	71.4934	-1.09554	0.417681	-2.62291	0.00871816	0.0246352
1773	Zm00001d023372	17865.2	-1.09455	0.151482	-7.22563	4.98787e-13	8.15788e-12
1774	Zm00001d042361	1955.32	-1.09416	0.157457	-6.94896	3.67999e-12	5.55796e-11
1775	Zm00001d018276	763.838	-1.09323	0.186772	-5.85329	4.81928e-09	5.0849e-08
1776	Zm00001d027519	2313.99	-1.09316	0.151463	-7.21734	5.30128e-13	8.65177e-12
1777	Zm00001d044686	365.115	-1.09293	0.26295	-4.15642	3.23267e-05	0.000176112
1778	Zm00001d044999	338.014	-1.09245	0.260846	-4.18809	2.81307e-05	0.000155115
1779	Zm00001d038520	93.1577	-1.09235	0.38346	-2.84867	0.00439019	0.013684
1780	Zm00001d006297	151.446	-1.09231	0.429906	-2.54081	0.0110596	0.0300464
1781	Zm00001d047402	1516.02	-1.09196	0.254983	-4.28248	1.84819e-05	0.000105848
1782	Zm00001d036177	632.417	-1.0918	0.211703	-5.15722	2.50645e-07	2.02705e-06
1783	Zm00001d028074	166.299	-1.09164	0.340667	-3.20442	0.00135337	0.00492479
1784	Zm00001d032261	1020.99	-1.0915	0.152145	-7.17406	7.28043e-13	1.16966e-11
1785	Zm00001d033557	1291.45	-1.09066	0.156716	-6.95946	3.41581e-12	5.1762e-11
1786	Zm00001d016001	143.867	-1.09039	0.456694	-2.38757	0.01696	0.0430452
1787	Zm00001d025319	1562.67	-1.08996	0.190752	-5.71404	1.10327e-08	1.10693e-07
1788	Zm00001d010705	1731.6	-1.08961	0.180558	-6.03465	1.59306e-09	1.78904e-08
1789	Zm00001d052176	129.493	-1.0891	0.39244	-2.77519	0.00551691	0.016638
1790	Zm00001d042277	142.344	-1.08888	0.33952	-3.2071	0.00134078	0.0048837
1791	Zm00001d002378	113.981	-1.08831	0.417482	-2.60685	0.00913791	0.0255855
1792	Zm00001d026608	815.269	-1.08826	0.205032	-5.30773	1.10999e-07	9.54877e-07
1793	Zm00001d018002	94.2566	-1.0864	0.385911	-2.81515	0.00487548	0.0149642
1794	Zm00001d005456	1368.49	-1.08618	0.189567	-5.72982	1.00535e-08	1.01452e-07
1795	Zm00001d004810	4198.94	-1.08613	0.164857	-6.58834	4.44779e-11	5.99157e-10
1796	Zm00001d003930	367.294	-1.08552	0.274443	-3.95534	7.64247e-05	0.000385865
1797	Zm00001d018006	1275.94	-1.08529	0.165732	-6.54846	5.81324e-11	7.75725e-10
1798	Zm00001d010075	2000.74	-1.08516	0.236424	-4.58992	4.43426e-06	2.88636e-05
1799	Zm00001d052565	1184.25	-1.08496	0.177195	-6.12295	9.18569e-10	1.06641e-08
1800	Zm00001d029932	807.518	-1.0845	0.242183	-4.47802	7.53399e-06	4.66255e-05
1801	Zm00001d019230	1636.09	-1.08417	0.161707	-6.70454	2.0204e-11	2.8257e-10
1802	Zm00001d027542	1355.48	-1.08378	0.179734	-6.02995	1.64015e-09	1.83919e-08
1803	Zm00001d012381	431.124	-1.08341	0.212441	-5.09984	3.39936e-07	2.68879e-06
1804	Zm00001d049571	1010.44	-1.08341	0.156982	-6.90147	5.14664e-12	7.69412e-11
1805	Zm00001d031203	1115.73	-1.08297	0.180379	-6.00388	1.92654e-09	2.14234e-08
1806	Zm00001d044327	379.209	-1.08115	0.232321	-4.65369	3.26052e-06	2.17416e-05
1807	Zm00001d014749	2191.92	-1.08067	0.140746	-7.67818	1.61362e-14	2.97601e-13
1808	Zm00001d032972	199.603	-1.08055	0.313287	-3.44908	0.000562501	0.00228598
1809	Zm00001d043986	3469.13	-1.07927	0.151717	-7.11366	1.13003e-12	1.78639e-11
1810	Zm00001d037946	1158.34	-1.07915	0.226336	-4.76791	1.86143e-06	1.2937e-05
1811	Zm00001d006127	1570.71	-1.07829	0.162428	-6.63854	3.16802e-11	4.32721e-10
1812	Zm00001d027887	426.448	-1.07803	0.220923	-4.87967	1.06262e-06	7.68669e-06
1813	Zm00001d045435	4155.42	-1.07754	0.181331	-5.94239	2.80899e-09	3.05474e-08
1814	Zm00001d038440	1687.22	-1.07738	0.141659	-7.60542	2.83978e-14	5.14129e-13
1815	Zm00001d011625	992.816	-1.07702	0.28265	-3.81044	0.000138717	0.000659569
1816	Zm00001d051561	402.127	-1.07676	0.259353	-4.15173	3.29977e-05	0.000179337
1817	Zm00001d046363	1521.73	-1.0764	0.210358	-5.11698	3.10465e-07	2.47553e-06
1818	Zm00001d046921	674.51	-1.0749	0.238969	-4.4981	6.85643e-06	4.28362e-05
1819	Zm00001d019936	311.596	-1.07481	0.311543	-3.44996	0.000560679	0.0022798
1820	Zm00001d014762	1866.85	-1.07453	0.156621	-6.86069	6.85301e-12	1.00948e-10
1821	zma-MIR159a	147.908	-1.07395	0.361728	-2.96894	0.00298829	0.00979474
1822	Zm00001d016364	8441.97	-1.07393	0.142476	-7.53761	4.78664e-14	8.53655e-13
1823	Zm00001d044667	15312.5	-1.07369	0.118496	-9.06105	1.29206e-19	3.54848e-18
1824	Zm00001d021850	2338.87	-1.07358	0.158027	-6.79366	1.09321e-11	1.57357e-10
1825	Zm00001d032377	1154.97	-1.07325	0.178399	-6.01601	1.78768e-09	1.99869e-08
1826	Zm00001d012824	664.19	-1.0729	0.204184	-5.2546	1.48344e-07	1.24452e-06
1827	Zm00001d024704	4276.46	-1.07258	0.12642	-8.48431	2.17003e-17	5.10127e-16
1828	Zm00001d038533	10749	-1.07225	0.139707	-7.67496	1.65475e-14	3.04692e-13
1829	Zm00001d006207	118.659	-1.07222	0.408824	-2.6227	0.00872369	0.0246416
1830	Zm00001d015742	238.726	-1.07161	0.338472	-3.16602	0.00154541	0.00553745
1831	Zm00001d047470	11912.8	-1.07138	0.220343	-4.8623	1.16027e-06	8.33197e-06
1832	Zm00001d051788	71.532	-1.07111	0.429314	-2.49493	0.0125983	0.0336048
1833	Zm00001d041426	115.523	-1.07098	0.419992	-2.54999	0.0107725	0.0293966
1834	Zm00001d013982	775.195	-1.07095	0.195648	-5.47386	4.40345e-08	4.03116e-07
1835	Zm00001d036024	2390.16	-1.06911	0.137044	-7.80121	6.13151e-15	1.17082e-13
1836	Zm00001d013221	8319.43	-1.06828	0.117878	-9.0626	1.27379e-19	3.50678e-18
1837	Zm00001d051689	551.637	-1.06819	0.217518	-4.91082	9.0698e-07	6.64347e-06
1838	Zm00001d028925	749.855	-1.06814	0.212756	-5.0205	5.1537e-07	3.93774e-06
1839	Zm00001d044802	3885.74	-1.06786	0.148186	-7.20619	5.75402e-13	9.37041e-12
1840	Zm00001d051615	864.674	-1.06772	0.243047	-4.39304	1.11777e-05	6.68161e-05
1841	Zm00001d049033	96.8477	-1.06743	0.386899	-2.75893	0.00579913	0.0173622
1842	Zm00001d038678	509.117	-1.06576	0.1929	-5.52495	3.29577e-08	3.08308e-07
1843	Zm00001d039514	2676.82	-1.06568	0.164487	-6.47882	9.24426e-11	1.20938e-09
1844	Zm00001d049905	831.461	-1.06484	0.192038	-5.54492	2.94086e-08	2.77395e-07
1845	Zm00001d027805	1559.58	-1.06482	0.158939	-6.69952	2.091e-11	2.91545e-10
1846	Zm00001d043270	642.282	-1.06471	0.202432	-5.25957	1.44393e-07	1.21407e-06
1847	Zm00001d025395	439.58	-1.0639	0.194117	-5.48069	4.23665e-08	3.88474e-07
1848	Zm00001d031199	1052.5	-1.06377	0.185088	-5.74737	9.06399e-09	9.19984e-08
1849	Zm00001d015308	2559.59	-1.06365	0.159497	-6.66879	2.57913e-11	3.56536e-10
1850	Zm00001d041444	1836.21	-1.06343	0.185036	-5.74716	9.07546e-09	9.20737e-08
1851	Zm00001d051235	5883	-1.06252	0.135446	-7.84462	4.34278e-15	8.42737e-14
1852	Zm00001d045544	8951.43	-1.06105	0.198361	-5.3491	8.83931e-08	7.71267e-07
1853	Zm00001d025896	1209.46	-1.06096	0.20098	-5.27894	1.29931e-07	1.10063e-06
1854	Zm00001d036709	733.07	-1.06078	0.198978	-5.33116	9.75854e-08	8.45986e-07
1855	Zm00001d021442	2204.98	-1.05981	0.243571	-4.35112	1.35446e-05	7.98075e-05
1856	Zm00001d036228	89.3745	-1.05948	0.422916	-2.50518	0.012239	0.0327794
1857	Zm00001d044745	1156.29	-1.05902	0.167728	-6.3139	2.72096e-10	3.36192e-09
1858	Zm00001d026405	1287.18	-1.058	0.195641	-5.40787	6.37782e-08	5.71184e-07
1859	Zm00001d027375	3834.62	-1.0577	0.199985	-5.28887	1.23076e-07	1.04882e-06
1860	Zm00001d018042	314.172	-1.05746	0.233223	-4.53412	5.78445e-06	3.66845e-05
1861	Zm00001d019664	3414.66	-1.05733	0.153282	-6.89796	5.27529e-12	7.87302e-11
1862	Zm00001d044015	360.054	-1.05659	0.303502	-3.48132	0.00049894	0.00205715
1863	Zm00001d047750	147.615	-1.0556	0.348718	-3.0271	0.0024691	0.00828408
1864	Zm00001d021572	244.285	-1.05495	0.355812	-2.9649	0.00302783	0.00990001
1865	Zm00001d013228	2139.72	-1.05434	0.125052	-8.43118	3.42202e-17	7.93747e-16
1866	Zm00001d034937	780.248	-1.05295	0.207874	-5.06535	4.07656e-07	3.17353e-06
1867	Zm00001d042192	105.507	-1.05284	0.450193	-2.33863	0.0193544	0.0480997
1868	Zm00001d009715	358.32	-1.05216	0.302948	-3.47308	0.000514518	0.00210911
1869	Zm00001d045304	98.4499	-1.05174	0.400636	-2.62517	0.00866063	0.0244909
1870	Zm00001d011944	135.996	-1.05055	0.338147	-3.1068	0.00189127	0.00659536
1871	Zm00001d050266	144.485	-1.05026	0.326787	-3.21391	0.0013094	0.00478631
1872	Zm00001d022227	916.227	-1.04923	0.201152	-5.21609	1.82741e-07	1.51019e-06
1873	Zm00001d009474	104.929	-1.04893	0.373701	-2.80686	0.00500264	0.0152924
1874	Zm00001d017282	404.088	-1.04883	0.217406	-4.82429	1.40501e-06	9.96646e-06
1875	Zm00001d023933	226.3	-1.04874	0.295478	-3.54929	0.000386271	0.00163694
1876	Zm00001d051802	128.895	-1.04853	0.366372	-2.86192	0.00421085	0.0131956
1877	Zm00001d035569	487.495	-1.04763	0.193719	-5.40798	6.37406e-08	5.71073e-07
1878	Zm00001d020530	1684.48	-1.04735	0.167992	-6.2345	4.5321e-10	5.46574e-09
1879	Zm00001d007501	319.003	-1.04621	0.252523	-4.14302	3.4276e-05	0.000185706
1880	Zm00001d014029	1081.89	-1.04505	0.198573	-5.26281	1.41872e-07	1.19464e-06
1881	Zm00001d012459	1754.87	-1.04493	0.134482	-7.76998	7.84986e-15	1.48519e-13
1882	Zm00001d007037	984.968	-1.0448	0.235765	-4.43152	9.35711e-06	5.6695e-05
1883	Zm00001d024763	136.991	-1.04472	0.40122	-2.60387	0.00921778	0.0257678
1884	Zm00001d032505	2083.9	-1.04413	0.138477	-7.54012	4.69538e-14	8.38039e-13
1885	Zm00001d029211	194.256	-1.04345	0.282955	-3.68768	0.000226305	0.00101819
1886	Zm00001d034651	272.707	-1.04341	0.266053	-3.92183	8.78797e-05	0.000438528
1887	Zm00001d039634	441.169	-1.04277	0.265465	-3.92808	8.56251e-05	0.000428314
1888	Zm00001d003379	4502.58	-1.04212	0.159451	-6.53566	6.33294e-11	8.41116e-10
1889	Zm00001d002680	1848.6	-1.04194	0.23409	-4.45104	8.54568e-06	5.22041e-05
1890	Zm00001d039293	2638.74	-1.04186	0.160504	-6.49116	8.51799e-11	1.11888e-09
1891	Zm00001d029525	3320.05	-1.04096	0.132949	-7.82978	4.88741e-15	9.4118e-14
1892	Zm00001d000407	1152.29	-1.04087	0.19284	-5.39759	6.7543e-08	6.01576e-07
1893	Zm00001d034388	670.703	-1.04046	0.172	-6.04918	1.45588e-09	1.64394e-08
1894	Zm00001d027449	162.6	-1.04017	0.369807	-2.81273	0.00491231	0.0150589
1895	Zm00001d032688	151.987	-1.03999	0.321562	-3.23418	0.00121991	0.00449394
1896	Zm00001d002682	600.965	-1.03996	0.22171	-4.69064	2.72358e-06	1.84266e-05
1897	Zm00001d047107	272.467	-1.03963	0.24015	-4.32907	1.49737e-05	8.74336e-05
1898	Zm00001d052967	1534.49	-1.03944	0.161082	-6.45282	1.09789e-10	1.42644e-09
1899	Zm00001d033337	1101.79	-1.03937	0.160721	-6.4669	1.00031e-10	1.30339e-09
1900	Zm00001d038984	347.602	-1.03897	0.338006	-3.07382	0.00211339	0.0072497
1901	Zm00001d009426	880.395	-1.03879	0.195885	-5.30304	1.13889e-07	9.77038e-07
1902	Zm00001d015200	586.185	-1.03809	0.204899	-5.06636	4.05488e-07	3.15774e-06
1903	Zm00001d030969	1130.19	-1.03787	0.210117	-4.93948	7.83299e-07	5.80311e-06
1904	Zm00001d036226	2454.08	-1.03777	0.22478	-4.61685	3.89614e-06	2.56186e-05
1905	Zm00001d003345	2246.38	-1.03748	0.162051	-6.40219	1.53163e-10	1.95087e-09
1906	Zm00001d032268	1464.45	-1.03747	0.164577	-6.30384	2.90353e-10	3.57e-09
1907	Zm00001d033258	98.8923	-1.03725	0.389466	-2.66326	0.00773884	0.0222673
1908	Zm00001d013702	270.34	-1.03689	0.240294	-4.31508	1.59544e-05	9.2493e-05
1909	Zm00001d034777	2935.05	-1.03678	0.192132	-5.39619	6.80692e-08	6.05786e-07
1910	Zm00001d008541	255.01	-1.03651	0.268449	-3.86111	0.000112871	0.000547463
1911	Zm00001d000998	114.138	-1.03647	0.395249	-2.62233	0.00873317	0.0246592
1912	Zm00001d028170	256.881	-1.03628	0.304965	-3.39802	0.000678746	0.00269721
1913	Zm00001d017709	772.312	-1.03497	0.203373	-5.08904	3.59872e-07	2.83462e-06
1914	Zm00001d052266	217.69	-1.03491	0.254966	-4.059	4.92839e-05	0.00025814
1915	Zm00001d043400	1333.87	-1.0349	0.159986	-6.46869	9.88532e-11	1.28953e-09
1916	Zm00001d007807	7886	-1.03489	0.198421	-5.21563	1.83196e-07	1.51285e-06
1917	Zm00001d027911	385.738	-1.03459	0.24432	-4.23457	2.28985e-05	0.000129024
1918	Zm00001d029490	6580.68	-1.03409	0.150726	-6.86072	6.85138e-12	1.00948e-10
1919	Zm00001d051990	203.446	-1.03395	0.29666	-3.4853	0.00049158	0.00202828
1920	Zm00001d048153	884.493	-1.03271	0.168028	-6.14603	7.94485e-10	9.27581e-09
1921	Zm00001d008512	4372.09	-1.03184	0.133862	-7.70825	1.27557e-14	2.36794e-13
1922	Zm00001d042900	861.257	-1.03135	0.169358	-6.08978	1.13063e-09	1.29537e-08
1923	Zm00001d031659	4191.06	-1.03113	0.146809	-7.02363	2.16181e-12	3.35665e-11
1924	Zm00001d018667	10495.4	-1.03013	0.136761	-7.53233	4.98432e-14	8.86819e-13
1925	Zm00001d041709	108.179	-1.03003	0.398492	-2.58481	0.00974317	0.0269936
1926	Zm00001d025888	180.611	-1.02886	0.31957	-3.21952	0.00128403	0.00470342
1927	Zm00001d024512	1457.25	-1.02851	0.172749	-5.95377	2.62036e-09	2.85646e-08
1928	Zm00001d034898	678.879	-1.02787	0.263639	-3.89878	9.66777e-05	0.000478015
1929	Zm00001d030032	246.761	-1.02772	0.248678	-4.13275	3.58445e-05	0.000193373
1930	Zm00001d018392	1659.72	-1.02767	0.155391	-6.61344	3.755e-11	5.08551e-10
1931	Zm00001d038532	1614.48	-1.02766	0.192187	-5.34717	8.93422e-08	7.78313e-07
1932	Zm00001d032777	395.257	-1.02735	0.241567	-4.25286	2.11053e-05	0.000119754
1933	Zm00001d043691	1539.01	-1.02586	0.14685	-6.98576	2.83325e-12	4.33102e-11
1934	Zm00001d032190	2322.6	-1.02509	0.207481	-4.94063	7.78725e-07	5.77489e-06
1935	Zm00001d006845	1343.5	-1.0243	0.216906	-4.72231	2.33176e-06	1.59421e-05
1936	Zm00001d022109	2310.58	-1.02381	0.182579	-5.6075	2.05274e-08	1.98059e-07
1937	Zm00001d029529	1707.77	-1.02287	0.184689	-5.53833	3.05368e-08	2.87081e-07
1938	Zm00001d018161	822.071	-1.02266	0.197237	-5.18492	2.16106e-07	1.76726e-06
1939	Zm00001d003322	2155.09	-1.02216	0.149438	-6.84	7.91953e-12	1.16281e-10
1940	Zm00001d010199	1268.53	-1.02194	0.182753	-5.59191	2.24584e-08	2.15056e-07
1941	Zm00001d050705	1455	-1.02186	0.182151	-5.60995	2.02388e-08	1.95786e-07
1942	Zm00001d002266	6399.08	-1.02149	0.130734	-7.8135	5.56198e-15	1.06476e-13
1943	Zm00001d042695	1651.44	-1.02126	0.148141	-6.89382	5.4314e-12	8.09004e-11
1944	Zm00001d035298	1923.39	-1.02072	0.17862	-5.71445	1.10062e-08	1.10476e-07
1945	Zm00001d052405	177.509	-1.02044	0.406424	-2.51078	0.0120464	0.032317
1946	Zm00001d030529	328.92	-1.01835	0.281436	-3.61842	0.000296407	0.00129258
1947	Zm00001d026311	3522.15	-1.01747	0.153912	-6.61069	3.82538e-11	5.17464e-10
1948	Zm00001d045565	314.793	-1.01677	0.291135	-3.49243	0.000478654	0.00198216
1949	Zm00001d033364	244.232	-1.01537	0.276974	-3.66592	0.000246447	0.00109685
1950	Zm00001d036715	413.548	-1.01536	0.229852	-4.41746	9.98672e-06	6.01746e-05
1951	Zm00001d009088	504.162	-1.01517	0.215822	-4.70375	2.55423e-06	1.73637e-05
1952	Zm00001d002025	2502.24	-1.01514	0.154181	-6.5841	4.57644e-11	6.15757e-10
1953	Zm00001d001804	2506.25	-1.0146	0.135977	-7.46154	8.55183e-14	1.49575e-12
1954	Zm00001d044219	2544.37	-1.01452	0.163123	-6.21939	4.99087e-10	5.9872e-09
1955	Zm00001d004999	898.87	-1.0142	0.208056	-4.87468	1.08987e-06	7.87126e-06
1956	Zm00001d012394	377.778	-1.01414	0.247377	-4.09957	4.1391e-05	0.00022005
1957	Zm00001d047272	6262.4	-1.01407	0.133736	-7.58268	3.3849e-14	6.10384e-13
1958	Zm00001d034143	574.743	-1.01381	0.201876	-5.02197	5.11433e-07	3.91294e-06
1959	Zm00001d032543	3994.35	-1.01259	0.147209	-6.8786	6.04426e-12	8.96756e-11
1960	Zm00001d021971	786.871	-1.01215	0.278096	-3.63956	0.000273099	0.00120273
1961	Zm00001d013259	5889.54	-1.01123	0.122309	-8.2678	1.36449e-16	2.97343e-15
1962	Zm00001d002854	1491.75	-1.01049	0.157087	-6.43268	1.25377e-10	1.61601e-09
1963	Zm00001d010416	1651.68	-1.00897	0.150721	-6.6943	2.16704e-11	3.01405e-10
1964	Zm00001d033637	1295.76	-1.0088	0.142682	-7.07025	1.54655e-12	2.42123e-11
1965	Zm00001d043263	495.158	-1.00855	0.217459	-4.63788	3.52001e-06	2.33347e-05
1966	Zm00001d043082	411.36	-1.00838	0.244021	-4.13232	3.59113e-05	0.000193657
1967	Zm00001d016299	852.049	-1.00809	0.157171	-6.41399	1.41763e-10	1.81177e-09
1968	Zm00001d051328	111.989	-1.008	0.390592	-2.5807	0.00986015	0.0272744
1969	Zm00001d012447	1665.65	-1.00796	0.200121	-5.03676	4.73488e-07	3.64722e-06
1970	Zm00001d002194	1206.16	-1.00779	0.186525	-5.40297	6.55479e-08	5.86339e-07
1971	Zm00001d041481	426.776	-1.0073	0.198725	-5.06882	4.00282e-07	3.12242e-06
1972	Zm00001d012061	4245.99	-1.0071	0.128048	-7.86501	3.69078e-15	7.19909e-14
1973	Zm00001d031423	1089.12	-1.00688	0.203111	-4.95729	7.14821e-07	5.33938e-06
1974	Zm00001d026516	1100.28	-1.00523	0.218396	-4.60278	4.16882e-06	2.72614e-05
1975	Zm00001d051617	293.99	-1.00518	0.260186	-3.86332	0.000111855	0.000542882
1976	Zm00001d043296	1397.73	-1.00511	0.219116	-4.58713	4.49387e-06	2.91851e-05
1977	Zm00001d002738	294.153	-1.0037	0.242417	-4.14039	3.4672e-05	0.000187762
1978	Zm00001d015637	270.461	-1.00319	0.272947	-3.67542	0.00023746	0.00106185
1979	Zm00001d010646	4826.4	-1.00278	0.141467	-7.08843	1.35642e-12	2.13535e-11
1980	Zm00001d017551	495.999	-1.00181	0.231994	-4.31828	1.57253e-05	9.13517e-05
1981	Zm00001d038650	3446.33	-1.00146	0.157279	-6.36744	1.92207e-10	2.41831e-09
1982	Zm00001d033205	815.925	-1.00137	0.18714	-5.35093	8.75033e-08	7.64348e-07
1983	Zm00001d030021	5309.77	-1.00132	0.135904	-7.36787	1.73375e-13	2.95714e-12
1984	Zm00001d046591	4542.86	1.00013	0.119401	8.37626	5.46365e-17	1.24441e-15
1985	Zm00001d008869	433.235	1.00176	0.198916	5.03609	4.75145e-07	3.65761e-06
1986	Zm00001d006645	4313.5	1.00272	0.214498	4.6747	2.94381e-06	1.97809e-05
1987	Zm00001d033709	6266.54	1.00281	0.163773	6.12321	9.17068e-10	1.06522e-08
1988	Zm00001d052040	149.804	1.00398	0.392659	2.55687	0.0105617	0.0289049
1989	Zm00001d043191	809.498	1.004	0.201086	4.99288	5.94857e-07	4.50712e-06
1990	Zm00001d028104	2715.8	1.00412	0.122088	8.22455	1.95931e-16	4.21298e-15
1991	Zm00001d046779	160.809	1.00421	0.360012	2.78939	0.00528077	0.0160346
1992	Zm00001d048614	336.067	1.00478	0.252323	3.98213	6.82999e-05	0.000348489
1993	Zm00001d010968	138.967	1.00498	0.30678	3.27589	0.00105331	0.00394573
1994	Zm00001d003855	689.721	1.00498	0.17874	5.6226	1.88104e-08	1.8259e-07
1995	Zm00001d034320	4731.38	1.00503	0.125525	8.00661	1.17911e-15	2.3734e-14
1996	Zm00001d014180	745.159	1.00581	0.206805	4.86356	1.15294e-06	8.28457e-06
1997	Zm00001d043425	2217.76	1.00619	0.160365	6.27438	3.51029e-10	4.28123e-09
1998	Zm00001d006680	6367.57	1.00696	0.130479	7.71741	1.18719e-14	2.2093e-13
[truncated: 1,499 more rows]

## Sheet: D_V7 versus P_V7
Supplemental Dataset 2. List of line-specific differentially expressed genes (D_V7 versus P_V7)
	gene_ID	baseMean	log2FoldChange	lfcSE	stat	pvalue	padj
1	Zm00001d051591	9853.49	-9.67743	0.376644	-25.6938	1.36985e-145	3.77811e-143
2	Zm00001d002937	5336.47	-9.07572	0.215396	-42.1351	0	0
3	Zm00001d005779	9791.64	-8.10974	0.144617	-56.0774	0	0
4	Zm00001d042692	10392.8	-6.70318	0.330322	-20.2929	1.48588e-91	2.04906e-89
5	Zm00001d011604	8309.42	-6.56474	0.13906	-47.2079	0	0
6	Zm00001d018257	5693.2	-6.55829	0.377563	-17.3701	1.39016e-67	1.20459e-65
7	Zm00001d032540	839.354	-6.37127	0.253276	-25.1555	1.23063e-139	3.12719e-137
8	Zm00001d010220	2235.45	-6.32727	0.185558	-34.0987	7.71294e-255	7.58417e-252
9	Zm00001d042278	1608.73	-6.28804	0.179568	-35.0175	1.21652e-268	1.25058e-265
10	Zm00001d007487	661.181	-6.06697	0.249064	-24.3591	4.64869e-131	1.04094e-128
11	Zm00001d015097	2421.93	-5.90245	0.150244	-39.2858	0	0
12	Zm00001d014178	1146.22	-5.85254	0.208558	-28.0619	2.85613e-173	1.07657e-170
13	Zm00001d053082	1550.62	-5.81506	0.407473	-14.2711	3.31527e-46	1.57849e-44
14	Zm00001d024885	1885.96	-5.80181	0.156492	-37.0742	7.3228e-301	1.18295e-297
15	Zm00001d028733	819.589	-5.78556	0.230881	-25.0586	1.4054e-138	3.45483e-136
16	Zm00001d021382	1412	-5.71059	0.192678	-29.638	4.8402e-193	2.32906e-190
17	Zm00001d010577	788.614	-5.6366	0.214944	-26.2236	1.42861e-151	4.30793e-149
18	Zm00001d051060	299.574	-5.58974	0.321673	-17.3771	1.23057e-67	1.07454e-65
19	Zm00001d037652	1970.36	-5.55269	0.195828	-28.3549	7.28876e-177	2.84211e-174
20	Zm00001d038250	1642.64	-5.54038	0.202558	-27.352	1.02222e-164	3.45054e-162
21	Zm00001d031991	410.1	-5.48258	0.278228	-19.7053	1.94042e-86	2.39806e-84
22	Zm00001d019111	485.17	-5.45347	0.269282	-20.2519	3.41577e-91	4.68189e-89
23	Zm00001d002305	826.331	-5.4167	0.217288	-24.9287	3.63885e-137	8.66277e-135
24	Zm00001d034421	9277.58	-5.41159	0.116785	-46.338	0	0
25	Zm00001d009351	1036.04	-5.368	0.208836	-25.7044	1.04393e-145	2.91476e-143
26	Zm00001d052902	780.705	-5.34946	0.240044	-22.2854	5.12263e-110	8.98088e-108
27	Zm00001d048693	1366.68	-5.34708	0.167793	-31.8671	7.64217e-223	4.32088e-220
28	Zm00001d034434	716.036	-5.29474	0.234311	-22.5971	4.62654e-113	8.71949e-111
29	Zm00001d014114	1923.77	-5.24027	0.156784	-33.4235	6.2546e-245	5.05193e-242
30	Zm00001d040496	269.892	-5.23816	0.308563	-16.976	1.23627e-64	1.00936e-62
31	Zm00001d029722	2829.02	-5.20416	0.130523	-39.8714	0	0
32	Zm00001d018857	1489.17	-5.19227	0.158276	-32.8052	4.95979e-236	3.29914e-233
33	Zm00001d021383	503.14	-5.1812	0.240826	-21.5143	1.14463e-102	1.78531e-100
34	Zm00001d015747	2399.41	-5.15549	0.142905	-36.0763	5.33158e-285	7.09289e-282
35	Zm00001d026371	781.578	-5.13422	0.210561	-24.3835	2.5566e-131	5.78201e-129
36	Zm00001d046975	814.713	-5.08814	0.229298	-22.1901	4.28064e-109	7.447e-107
37	Zm00001d053634	542.765	-4.98852	0.235786	-21.157	2.37877e-99	3.58656e-97
38	Zm00001d037731	1440.66	-4.87038	0.1818	-26.7898	4.24458e-158	1.35205e-155
39	Zm00001d006300	480.72	-4.86897	0.246848	-19.7246	1.32573e-86	1.6474e-84
40	Zm00001d011294	457.495	-4.86649	0.258897	-18.797	7.98407e-79	8.85136e-77
41	Zm00001d030162	253.165	-4.85739	0.298834	-16.2545	2.07674e-59	1.4541e-57
42	Zm00001d013055	408.925	-4.85097	0.256825	-18.8882	1.42524e-79	1.61976e-77
43	Zm00001d050161	227.984	-4.82882	0.309368	-15.6086	6.3575e-55	3.98286e-53
44	Zm00001d023353	248.317	-4.79629	0.320572	-14.9617	1.30699e-50	7.26261e-49
45	Zm00001d037443	260.619	-4.79533	0.313224	-15.3096	6.59596e-53	3.92564e-51
46	Zm00001d053182	262.061	-4.74318	0.297857	-15.9243	4.29613e-57	2.83269e-55
47	Zm00001d025354	11596	-4.69669	0.143014	-32.8407	1.54784e-236	1.06079e-233
48	Zm00001d014863	1031.5	-4.65086	0.195168	-23.83	1.63185e-125	3.35509e-123
49	Zm00001d023473	377.664	-4.60924	0.306898	-15.0188	5.53062e-51	3.09605e-49
50	Zm00001d011666	980.912	-4.60147	0.229594	-20.0418	2.38016e-89	3.12964e-87
51	Zm00001d011446	801.816	-4.58709	0.227245	-20.1857	1.3084e-90	1.76135e-88
52	Zm00001d040534	1919.87	-4.58233	0.139873	-32.7605	2.15116e-235	1.39002e-232
53	Zm00001d006386	526.287	-4.57256	0.508573	-8.99096	2.45074e-19	3.79111e-18
54	Zm00001d044846	755.323	-4.56865	0.203328	-22.4693	8.28483e-112	1.53582e-109
55	Zm00001d039133	1776.61	-4.54585	0.182758	-24.8735	1.43925e-136	3.39063e-134
56	Zm00001d039914	15215.5	-4.53293	0.330325	-13.7226	7.43019e-43	3.25031e-41
57	Zm00001d011079	586.948	-4.53079	0.217208	-20.8592	1.25873e-96	1.80173e-94
58	Zm00001d007936	310.715	-4.5243	0.312975	-14.4558	2.30567e-47	1.14604e-45
59	Zm00001d027011	2458.9	-4.50655	0.174527	-25.8215	5.09188e-147	1.43947e-144
60	Zm00001d002113	565.431	-4.50424	0.225333	-19.9893	6.82791e-89	8.87472e-87
61	Zm00001d042258	3478.24	-4.46946	0.126672	-35.2836	1.04699e-272	1.18394e-269
62	Zm00001d010428	14173.8	-4.45335	0.162889	-27.3397	1.43129e-164	4.7603e-162
63	Zm00001d049989	1296.56	-4.43746	0.148007	-29.9813	1.71934e-197	8.45317e-195
64	Zm00001d049543	9553.9	-4.43177	0.121668	-36.4251	1.70309e-290	2.5678e-287
65	Zm00001d034460	3153.82	-4.42443	0.13392	-33.0379	2.32355e-239	1.75165e-236
66	Zm00001d014204	573.552	-4.40543	0.199959	-22.0316	1.43358e-107	2.40161e-105
67	Zm00001d049771	5076.5	-4.40382	0.172106	-25.5878	2.08496e-144	5.68113e-142
68	Zm00001d032879	342.978	-4.3734	0.240825	-18.1601	1.06839e-73	1.07661e-71
69	Zm00001d018435	210.664	-4.36161	0.334925	-13.0226	9.09634e-39	3.47505e-37
70	Zm00001d042861	1927.7	-4.31381	0.136944	-31.5005	8.54834e-218	4.71535e-215
71	Zm00001d004855	1200.4	-4.30991	0.179925	-23.9539	8.41079e-127	1.76128e-124
72	Zm00001d041973	1521.65	-4.28531	0.188027	-22.791	5.63648e-115	1.08029e-112
73	Zm00001d022032	607.619	-4.27075	0.246411	-17.3319	2.70438e-67	2.32556e-65
74	Zm00001d037665	191.446	-4.2694	0.327843	-13.0227	9.09122e-39	3.47505e-37
75	Zm00001d020071	262.245	-4.24966	0.336316	-12.6359	1.33807e-36	4.77314e-35
76	Zm00001d011930	303.516	-4.22839	0.249973	-16.9154	3.46485e-64	2.7399e-62
77	Zm00001d053092	8816.58	-4.2282	0.163109	-25.9225	3.71462e-148	1.06342e-145
78	Zm00001d047607	349.464	-4.21159	0.246892	-17.0584	3.02552e-65	2.50642e-63
79	Zm00001d026062	599.881	-4.20522	0.210721	-19.9563	1.32027e-88	1.70624e-86
80	Zm00001d033447	200.175	-4.19986	0.349995	-11.9998	3.56356e-33	1.1101e-31
81	Zm00001d024713	3929.43	-4.19916	0.143564	-29.2493	4.58154e-188	2.11461e-185
82	Zm00001d052394	325.382	-4.19426	0.284072	-14.7648	2.47079e-49	1.30865e-47
83	Zm00001d002506	162.159	-4.11996	0.325244	-12.6673	8.97303e-37	3.24176e-35
84	Zm00001d037680	1799.62	-4.11521	0.149341	-27.5558	3.76699e-167	1.29082e-164
85	Zm00001d048123	146.291	-4.11251	0.346197	-11.8791	1.5197e-32	4.64453e-31
86	Zm00001d006458	163.285	-4.09543	0.317112	-12.9148	3.71582e-38	1.40766e-36
87	Zm00001d050463	269.579	-4.0707	0.300192	-13.5604	6.88041e-42	2.89233e-40
88	Zm00001d044874	447.542	-4.05503	0.228814	-17.7219	2.8412e-70	2.62271e-68
89	Zm00001d047841	414.23	-4.04495	0.61776	-6.54777	5.84018e-11	4.68042e-10
90	Zm00001d019450	170.199	-4.04408	0.419565	-9.63874	5.48582e-22	9.90162e-21
91	Zm00001d018893	309.157	-4.01419	0.306776	-13.0851	4.00696e-39	1.54118e-37
92	Zm00001d009588	288.393	-4.01057	0.29679	-13.5132	1.30762e-41	5.4664e-40
93	Zm00001d010079	478.563	-4.00206	0.209178	-19.1323	1.35836e-81	1.59175e-79
94	Zm00001d002817	1070.8	-3.99864	0.160314	-24.9425	2.57351e-137	6.19175e-135
95	Zm00001d006301	136.813	-3.98659	0.351157	-11.3527	7.18711e-30	1.91228e-28
96	Zm00001d019250	281.657	-3.97438	0.660289	-6.01915	1.75337e-09	1.19297e-08
97	Zm00001d008891	337.232	-3.97149	0.590243	-6.72857	1.71341e-11	1.44376e-10
98	Zm00001d020667	634.826	-3.94676	0.217722	-18.1275	1.93313e-73	1.9345e-71
99	Zm00001d028639	315.702	-3.93197	0.298671	-13.1649	1.39761e-39	5.48755e-38
100	Zm00001d037251	127.451	-3.92436	0.362545	-10.8245	2.63575e-27	6.24189e-26
101	Zm00001d033607	302.169	-3.87582	0.24248	-15.9841	1.64925e-57	1.09704e-55
102	Zm00001d008905	259.377	-3.86719	0.29503	-13.1078	2.9702e-39	1.15024e-37
103	Zm00001d019226	1090.52	-3.841	0.159734	-24.0462	9.14071e-128	1.95025e-125
104	Zm00001d042460	382.201	-3.83754	0.589971	-6.50463	7.78831e-11	6.1566e-10
105	Zm00001d004018	147.52	-3.83538	0.318289	-12.05	1.93964e-33	6.13524e-32
106	Zm00001d044183	346.26	-3.83452	0.265657	-14.4341	3.15801e-47	1.56283e-45
107	Zm00001d033044	8698.06	-3.81792	0.137677	-27.731	2.95245e-169	1.04332e-166
108	Zm00001d025389	416.058	-3.81453	0.206771	-18.4481	5.40093e-76	5.70782e-74
109	Zm00001d011075	1329.94	-3.80341	0.146546	-25.9537	1.65021e-148	4.78476e-146
110	Zm00001d029853	303.253	-3.77156	0.33466	-11.2698	1.84985e-29	4.86467e-28
111	Zm00001d014650	183.669	-3.75837	0.298758	-12.58	2.72156e-36	9.58737e-35
112	Zm00001d024083	581.275	-3.74244	0.17886	-20.9238	3.24816e-97	4.709e-95
113	Zm00001d036341	181.746	-3.7365	0.347567	-10.7504	5.89789e-27	1.37229e-25
114	Zm00001d025509	2522.86	-3.68541	0.161861	-22.769	9.29797e-115	1.76708e-112
115	Zm00001d042257	794.179	-3.67915	0.159379	-23.0843	6.65581e-118	1.30894e-115
116	Zm00001d008951	299.96	-3.67822	0.310358	-11.8516	2.11245e-32	6.38705e-31
117	Zm00001d051072	284.366	-3.66065	0.260244	-14.0662	6.12464e-45	2.82108e-43
118	Zm00001d019312	16636.9	-3.63554	0.123949	-29.331	4.17138e-189	1.96541e-186
119	Zm00001d007319	1434.91	-3.60659	0.181802	-19.838	1.39914e-87	1.77769e-85
120	Zm00001d013759	690.302	-3.59451	0.193607	-18.566	6.0553e-77	6.55247e-75
121	Zm00001d029390	174.393	-3.57167	0.311506	-11.4658	1.95978e-30	5.43168e-29
122	Zm00001d051546	218.673	-3.5607	0.293416	-12.1353	6.86429e-34	2.20515e-32
123	Zm00001d006941	120.382	-3.54907	0.347474	-10.2139	1.71772e-24	3.52522e-23
124	Zm00001d028434	263.574	-3.54529	0.260653	-13.6016	3.91892e-42	1.65664e-40
125	Zm00001d000383	373.502	-3.53884	0.245838	-14.395	5.56346e-47	2.72345e-45
126	Zm00001d017107	351.379	-3.52493	0.263782	-13.3631	9.93788e-41	4.06429e-39
127	Zm00001d028567	512.038	-3.50965	0.226908	-15.4673	5.76804e-54	3.52567e-52
128	Zm00001d029087	991.698	-3.50759	0.19434	-18.0487	8.07119e-73	7.90208e-71
129	Zm00001d037507	4702.5	-3.485	0.159517	-21.8472	8.26035e-106	1.3344e-103
130	Zm00001d007072	550.386	-3.47184	0.194373	-17.8618	2.3414e-71	2.24377e-69
131	Zm00001d039231	467.49	-3.47162	0.233585	-14.8623	5.78881e-50	3.12458e-48
132	Zm00001d023384	646.271	-3.42858	0.22751	-15.07	2.54974e-51	1.44523e-49
133	Zm00001d015328	6022.44	-3.42608	0.134101	-25.5485	5.71237e-144	1.53799e-141
134	Zm00001d029850	173.616	-3.42007	0.289785	-11.8021	3.80846e-32	1.13781e-30
135	Zm00001d052934	331.921	-3.41315	0.267861	-12.7423	3.44253e-37	1.26595e-35
136	Zm00001d048476	177.453	-3.39816	0.311207	-10.9193	9.31892e-28	2.25408e-26
137	Zm00001d001924	356.571	-3.39524	0.293956	-11.5502	7.36561e-31	2.07966e-29
138	Zm00001d023601	492.075	-3.39007	0.185454	-18.2798	1.19814e-74	1.24872e-72
139	Zm00001d019538	180.444	-3.38792	0.346875	-9.76697	1.56044e-22	2.90461e-21
140	Zm00001d029289	187.365	-3.36896	0.326354	-10.323	5.54562e-25	1.15701e-23
141	Zm00001d032376	3244.95	-3.36838	0.179041	-18.8134	5.86449e-79	6.59857e-77
142	Zm00001d020428	293.216	-3.36107	0.233186	-14.4137	4.24326e-47	2.09075e-45
143	Zm00001d052851	744.879	-3.35398	0.168879	-19.8602	8.99493e-88	1.14932e-85
144	Zm00001d038528	237.042	-3.32665	0.265627	-12.5238	5.5338e-36	1.92839e-34
145	Zm00001d001838	478.893	-3.32466	0.205701	-16.1626	9.2597e-59	6.36527e-57
146	Zm00001d021205	473.255	-3.30874	0.629327	-5.25758	1.45965e-07	7.84304e-07
147	Zm00001d029566	300.31	-3.29458	0.286051	-11.5175	1.07709e-30	3.01851e-29
148	Zm00001d030270	359.56	-3.29221	0.333712	-9.86541	5.87931e-23	1.11831e-21
149	Zm00001d051018	152.742	-3.28722	0.337454	-9.74123	2.01098e-22	3.71571e-21
150	Zm00001d036426	437.727	-3.27468	0.255497	-12.8169	1.31877e-37	4.88141e-36
151	Zm00001d036676	367.588	-3.27026	0.3226	-10.1372	3.77715e-24	7.61355e-23
152	Zm00001d043222	94.5354	-3.26216	0.426896	-7.64157	2.14588e-14	2.37665e-13
153	Zm00001d014155	121.541	-3.25055	0.371186	-8.75721	2.00145e-18	2.93165e-17
154	Zm00001d013294	1758.33	-3.24438	0.135948	-23.8648	7.10889e-126	1.475e-123
155	Zm00001d005566	584.342	-3.24292	0.192017	-16.8887	5.44643e-64	4.27696e-62
156	Zm00001d041148	128.781	-3.22416	0.367796	-8.76616	1.84859e-18	2.72185e-17
157	Zm00001d038875	772.763	-3.20578	0.180413	-17.7691	1.22611e-70	1.1554e-68
158	Zm00001d026444	76.9648	-3.20552	0.424408	-7.55292	4.25621e-14	4.60126e-13
159	Zm00001d025960	291.546	-3.20115	0.290058	-11.0363	2.55465e-28	6.34203e-27
160	Zm00001d007396	105.055	-3.1958	0.407029	-7.85153	4.11006e-15	4.78893e-14
161	Zm00001d015481	140.796	-3.18446	0.329027	-9.67842	3.72436e-22	6.78728e-21
162	Zm00001d008841	195.228	-3.1785	0.372837	-8.52518	1.52569e-17	2.10782e-16
163	Zm00001d005822	146.277	-3.17155	0.348091	-9.11126	8.14314e-20	1.29058e-18
164	Zm00001d002164	2634.04	-3.1699	0.157292	-20.153	2.53172e-90	3.36809e-88
165	Zm00001d032451	96.699	-3.15555	0.377108	-8.36774	5.87322e-17	7.869e-16
166	Zm00001d013810	258.038	-3.14443	0.269487	-11.6682	1.85295e-31	5.35201e-30
167	Zm00001d044826	919.704	-3.14202	0.227428	-13.8155	2.05543e-43	9.11484e-42
168	Zm00001d006056	1380.58	-3.13453	0.195274	-16.052	5.53729e-58	3.72713e-56
169	Zm00001d044915	575.664	-3.13343	0.179739	-17.4332	4.61709e-68	4.06304e-66
170	Zm00001d032035	167.979	-3.12803	0.323635	-9.6653	4.23391e-22	7.69728e-21
171	Zm00001d006855	1022.27	-3.12724	0.20008	-15.6299	4.55187e-55	2.87556e-53
172	Zm00001d039102	421.305	-3.12157	0.19571	-15.95	2.84909e-57	1.88407e-55
173	Zm00001d013338	161.698	-3.11832	0.316212	-9.86149	6.11336e-23	1.1599e-21
174	Zm00001d051709	501.93	-3.10609	0.215273	-14.4286	3.41972e-47	1.68865e-45
175	Zm00001d035710	386.108	-3.10579	0.232195	-13.3758	8.37923e-41	3.43929e-39
176	Zm00001d037107	88.4242	-3.10535	0.393153	-7.89857	2.82125e-15	3.33536e-14
177	Zm00001d048135	617.695	-3.10195	0.209484	-14.8076	1.30856e-49	6.99629e-48
178	Zm00001d052910	1115.45	-3.09789	0.164788	-18.7992	7.66349e-79	8.53781e-77
179	Zm00001d027447	1193.67	-3.09166	0.153236	-20.1758	1.59777e-90	2.13817e-88
180	Zm00001d014153	112.712	-3.08407	0.40174	-7.67678	1.63137e-14	1.82739e-13
181	Zm00001d016567	410.227	-3.07937	0.224208	-13.7344	6.3174e-43	2.76888e-41
182	Zm00001d011377	561.676	-3.07238	0.225676	-13.6141	3.3e-42	1.40024e-40
183	Zm00001d024894	872.548	-3.06163	0.17373	-17.623	1.64155e-69	1.50916e-67
184	Zm00001d038833	191.871	-3.05988	0.277021	-11.0456	2.30149e-28	5.73242e-27
185	Zm00001d048417	125.995	-3.05905	1.01586	-3.01129	0.00260141	0.00667426
186	Zm00001d031892	108.802	-3.05614	0.382987	-7.97974	1.46645e-15	1.78404e-14
187	Zm00001d031201	517.85	-3.0503	0.18306	-16.6629	2.44031e-62	1.85202e-60
188	Zm00001d026043	117.023	-3.04182	0.367047	-8.28729	1.15858e-16	1.51899e-15
189	Zm00001d003346	116.398	-3.0325	0.36414	-8.32786	8.23193e-17	1.09065e-15
190	Zm00001d043340	92.862	-3.01545	0.413069	-7.30011	2.87542e-13	2.89153e-12
191	Zm00001d026282	123.07	-3.01218	0.371942	-8.09852	5.56299e-16	7.01687e-15
192	Zm00001d018096	448.973	-3.00012	0.186283	-16.1052	2.34607e-58	1.59335e-56
193	Zm00001d046302	510.086	-2.9979	0.501362	-5.97951	2.23815e-09	1.50784e-08
194	Zm00001d039859	8330.93	-2.98654	0.164295	-18.1779	7.72771e-74	7.83721e-72
195	Zm00001d032036	222.109	-2.98314	0.259398	-11.5002	1.3154e-30	3.67273e-29
196	Zm00001d047942	89.5279	-2.98115	0.427593	-6.97194	3.126e-12	2.82564e-11
197	Zm00001d021009	699.257	-2.97853	0.184364	-16.1557	1.03546e-58	7.09636e-57
198	Zm00001d051697	88.5173	-2.97501	0.494023	-6.022	1.72274e-09	1.17389e-08
199	Zm00001d001082	80.2764	-2.97246	0.444481	-6.68749	2.27026e-11	1.88904e-10
200	Zm00001d025126	922.823	-2.96803	0.163837	-18.1157	2.39404e-73	2.38518e-71
201	Zm00001d000548	90.0512	-2.96685	0.391954	-7.56938	3.74999e-14	4.06957e-13
202	Zm00001d008303	395.834	-2.95327	0.210881	-14.0044	1.46423e-44	6.71706e-43
203	Zm00001d044264	89.3691	-2.95245	0.418035	-7.06268	1.6332e-12	1.51193e-11
204	Zm00001d036680	223.904	-2.95199	0.299956	-9.8414	7.46628e-23	1.40832e-21
205	Zm00001d032598	1212.47	-2.93548	0.157	-18.6973	5.20516e-78	5.71456e-76
206	Zm00001d008283	704.867	-2.93146	0.248524	-11.7955	4.11941e-32	1.22747e-30
207	Zm00001d016194	958.511	-2.92151	0.561009	-5.20759	1.91307e-07	1.01254e-06
208	Zm00001d043985	388.782	-2.91373	0.206259	-14.1265	2.60696e-45	1.21969e-43
209	Zm00001d052584	885.616	-2.91008	0.17611	-16.5242	2.45721e-61	1.82803e-59
210	Zm00001d037483	2799.17	-2.90333	0.129236	-22.4654	9.05399e-112	1.66476e-109
211	Zm00001d023724	595.489	-2.90272	0.206237	-14.0747	5.43463e-45	2.51349e-43
212	Zm00001d012251	140.759	-2.89497	0.309611	-9.35035	8.73572e-21	1.46672e-19
213	Zm00001d047044	10075.3	-2.89275	0.11769	-24.5795	2.09504e-133	4.83485e-131
214	Zm00001d050484	4112.69	-2.88928	0.103343	-27.9582	5.23902e-172	1.94239e-169
215	Zm00001d013057	591.494	-2.88914	0.195016	-14.8148	1.17476e-49	6.31079e-48
216	Zm00001d007789	200.062	-2.88874	0.334369	-8.63937	5.65224e-18	8.03464e-17
217	Zm00001d044261	4273	-2.8817	0.114297	-25.2124	2.93111e-140	7.53294e-138
218	Zm00001d028185	132.551	-2.87865	0.408652	-7.04425	1.86459e-12	1.7191e-11
219	Zm00001d002758	335.166	-2.87276	0.27939	-10.2823	8.47096e-25	1.76084e-23
220	Zm00001d007341	214.414	-2.86648	0.281935	-10.1672	2.77909e-24	5.63189e-23
221	Zm00001d030106	6462.47	-2.86575	0.147249	-19.4619	2.31148e-84	2.76594e-82
222	Zm00001d022044	152.458	-2.86445	0.329152	-8.70253	3.24566e-18	4.68137e-17
223	Zm00001d048962	273.867	-2.86157	0.278768	-10.2651	1.01238e-24	2.09863e-23
224	Zm00001d031940	3684.87	-2.84418	0.158524	-17.9417	5.57657e-72	5.41286e-70
225	Zm00001d034722	232.839	-2.84204	0.263787	-10.774	4.56646e-27	1.06579e-25
226	Zm00001d015857	173.641	-2.83854	0.314559	-9.02386	1.81575e-19	2.82623e-18
227	Zm00001d011745	2247.66	-2.82807	0.13529	-20.9038	4.94668e-97	7.12574e-95
228	Zm00001d009350	184.968	-2.82534	0.285399	-9.89959	4.17965e-23	8.01077e-22
229	Zm00001d010970	1710.65	-2.81905	0.168805	-16.7001	1.30926e-62	1.00374e-60
230	Zm00001d018244	138.745	-2.81742	0.37882	-7.43736	1.02718e-13	1.0735e-12
231	Zm00001d006590	989.561	-2.81683	0.142543	-19.7613	6.41348e-87	8.05818e-85
232	Zm00001d016842	178.805	-2.81562	0.280578	-10.0351	1.0689e-23	2.10393e-22
233	Zm00001d028021	145.307	-2.8124	0.360162	-7.8087	5.778e-15	6.67051e-14
234	Zm00001d038058	308.471	-2.80898	0.259728	-10.8151	2.92033e-27	6.89419e-26
235	Zm00001d023765	214.441	-2.8052	0.272509	-10.294	7.5004e-25	1.56052e-23
236	Zm00001d017178	229.565	-2.8029	0.325443	-8.61256	7.14494e-18	1.00994e-16
237	Zm00001d049539	952.984	-2.80142	0.19453	-14.401	5.10333e-47	2.50362e-45
238	Zm00001d014135	395.196	-2.79569	0.205744	-13.5882	4.70288e-42	1.98433e-40
239	Zm00001d040026	25380.9	-2.79219	0.124399	-22.4455	1.41566e-111	2.58199e-109
240	Zm00001d030368	907.495	-2.77996	0.193765	-14.3471	1.11101e-46	5.39196e-45
241	Zm00001d030672	124.028	-2.77565	0.358151	-7.74994	9.19352e-15	1.0443e-13
242	Zm00001d000316	739.112	-2.77416	0.54988	-5.04502	4.53477e-07	2.26849e-06
243	Zm00001d026224	1374.69	-2.77394	0.180143	-15.3986	1.67337e-53	1.01461e-51
244	Zm00001d000117	240.35	-2.76767	0.356548	-7.76241	8.33316e-15	9.49435e-14
245	Zm00001d043652	67.3562	-2.76281	0.451208	-6.12315	9.1743e-10	6.44166e-09
246	Zm00001d017706	194.759	-2.76197	0.33139	-8.3345	7.78261e-17	1.03354e-15
247	Zm00001d034555	2689.74	-2.74577	0.166641	-16.4772	5.35116e-61	3.94208e-59
248	Zm00001d044744	196.433	-2.74449	0.406934	-6.7443	1.53763e-11	1.30049e-10
249	Zm00001d046397	3007.13	-2.73742	0.11901	-23.0015	4.50027e-117	8.77398e-115
250	Zm00001d052154	82.7775	-2.73472	0.43119	-6.34226	2.26417e-10	1.70404e-09
251	Zm00001d030037	219.525	-2.72152	0.274748	-9.90553	3.93867e-23	7.57457e-22
252	Zm00001d053234	92.32	-2.72142	0.358673	-7.58748	3.26195e-14	3.5656e-13
253	Zm00001d019100	223.27	-2.72034	0.373272	-7.28783	3.14997e-13	3.1522e-12
254	Zm00001d018106	218.55	-2.71827	0.874778	-3.10739	0.00188748	0.00498916
255	Zm00001d031068	338.111	-2.7176	0.250066	-10.8675	1.64565e-27	3.93009e-26
256	Zm00001d028230	153.388	-2.71583	0.319959	-8.48805	2.1013e-17	2.87844e-16
257	Zm00001d014460	1681.31	-2.70971	0.151613	-17.8726	1.92764e-71	1.85513e-69
258	Zm00001d052106	572.018	-2.70868	0.211758	-12.7914	1.83097e-37	6.75517e-36
259	Zm00001d041650	164.244	-2.70809	0.34542	-7.84	4.50558e-15	5.2336e-14
260	Zm00001d011134	115.04	-2.70009	0.478932	-5.63774	1.72299e-08	1.04023e-07
261	Zm00001d046754	2951.38	-2.69559	0.431553	-6.24625	4.20423e-10	3.0593e-09
262	Zm00001d022355	590.334	-2.69321	0.223456	-12.0525	1.88056e-33	5.95669e-32
263	Zm00001d003474	108.457	-2.67957	0.337449	-7.94066	2.01114e-15	2.41422e-14
264	Zm00001d046925	787.782	-2.66798	0.210506	-12.6741	8.22669e-37	2.98165e-35
265	Zm00001d040725	4229.87	-2.66605	0.141721	-18.812	6.0278e-79	6.74875e-77
266	Zm00001d003102	258.367	-2.6641	0.238116	-11.1882	4.65532e-29	1.19778e-27
267	Zm00001d051544	1782.21	-2.66228	0.156239	-17.0399	4.1572e-65	3.41888e-63
268	Zm00001d032192	137.539	-2.66155	0.326732	-8.14597	3.76256e-16	4.78056e-15
269	Zm00001d034175	652.25	-2.64867	0.167677	-15.7962	3.30255e-56	2.13401e-54
270	Zm00001d043419	430.079	-2.64721	0.271453	-9.752	1.80872e-22	3.3557e-21
271	Zm00001d021344	151.387	-2.64388	0.295526	-8.94637	3.6737e-19	5.63284e-18
272	Zm00001d032866	128.688	-2.64088	0.307021	-8.60162	7.85957e-18	1.10818e-16
273	Zm00001d042511	337.735	-2.64085	0.203461	-12.9797	1.59601e-38	6.07666e-37
274	Zm00001d043702	199.938	-2.63898	0.360064	-7.32919	2.31541e-13	2.34611e-12
275	Zm00001d012213	1986.25	-2.63864	0.122253	-21.5834	2.57383e-103	4.04234e-101
276	Zm00001d049741	225.685	-2.63369	0.284166	-9.26816	1.89381e-20	3.11494e-19
277	Zm00001d013463	396.434	-2.62246	0.229313	-11.4362	2.75786e-30	7.5878e-29
278	Zm00001d017147	540.427	-2.62239	0.201312	-13.0265	8.6509e-39	3.31608e-37
279	Zm00001d046121	576.069	-2.62138	0.18266	-14.3511	1.04864e-46	5.10021e-45
280	Zm00001d042102	1285.62	-2.60765	0.186586	-13.9756	2.19588e-44	9.99236e-43
281	Zm00001d006591	838.902	-2.60665	0.21559	-12.0908	1.18187e-33	3.76467e-32
282	Zm00001d037160	146.302	-2.60245	0.400163	-6.50349	7.84795e-11	6.19941e-10
283	Zm00001d012420	13341.1	-2.60192	0.172728	-15.0636	2.80896e-51	1.58818e-49
284	Zm00001d011610	1500.06	-2.60033	0.21256	-12.2334	2.06172e-34	6.75767e-33
285	Zm00001d033271	245.935	-2.59798	0.298607	-8.70033	3.30922e-18	4.76697e-17
286	Zm00001d023625	88.7259	-2.59438	0.432405	-5.99989	1.97452e-09	1.3374e-08
287	Zm00001d033230	672.91	-2.58926	0.176295	-14.6871	7.80153e-49	4.08425e-47
288	Zm00001d048020	311.326	-2.58773	0.244282	-10.5932	3.20384e-26	7.1883e-25
289	Zm00001d051500	289.058	-2.58611	0.243204	-10.6335	2.08084e-26	4.72492e-25
290	Zm00001d013409	315.667	-2.57505	0.58829	-4.37718	1.20226e-05	4.8702e-05
291	Zm00001d028750	1384.37	-2.57432	0.392883	-6.55237	5.66307e-11	4.553e-10
292	Zm00001d010489	499.066	-2.57314	0.213878	-12.0309	2.44497e-33	7.69091e-32
293	Zm00001d038806	6559.07	-2.56793	0.344978	-7.44374	9.78734e-14	1.02572e-12
294	Zm00001d052500	404.193	-2.56548	0.201854	-12.7096	5.2333e-37	1.91826e-35
295	Zm00001d028664	60.4499	-2.56464	0.514618	-4.98358	6.24171e-07	3.06608e-06
296	Zm00001d020954	3977.88	-2.56217	0.153617	-16.679	1.8621e-62	1.42274e-60
297	Zm00001d031173	506.456	-2.56026	0.202313	-12.6549	1.05049e-36	3.77108e-35
298	Zm00001d011656	207.919	-2.55091	0.284964	-8.95167	3.50138e-19	5.37591e-18
299	Zm00001d047973	3419.9	-2.54598	0.125362	-20.3091	1.06873e-91	1.48285e-89
300	Zm00001d049532	66.48	-2.54477	0.52868	-4.81344	1.48357e-06	6.91278e-06
301	Zm00001d002100	85.0188	-2.54317	0.402072	-6.32516	2.52964e-10	1.89083e-09
302	Zm00001d029378	7551.72	-2.53947	0.0999536	-25.4065	2.13806e-142	5.6226e-140
303	Zm00001d011842	283.358	-2.53812	0.286426	-8.86134	7.90587e-19	1.18962e-17
304	Zm00001d044138	1416.62	-2.53768	0.187023	-13.5688	6.1289e-42	2.58122e-40
305	Zm00001d009608	375.947	-2.532	0.24148	-10.4854	1.00867e-25	2.21262e-24
306	Zm00001d018028	1084.84	-2.52865	0.171492	-14.745	3.31112e-49	1.74555e-47
307	Zm00001d038268	224.055	-2.52844	0.269502	-9.38189	6.48004e-21	1.10025e-19
308	Zm00001d033710	83.8609	-2.5184	0.437537	-5.75587	8.61983e-09	5.4227e-08
309	Zm00001d023304	929.326	-2.51595	0.537503	-4.68081	2.85738e-06	1.27687e-05
310	Zm00001d003276	127.554	-2.51565	0.368881	-6.81968	9.12422e-12	7.91536e-11
311	Zm00001d044951	92.4677	-2.51521	0.40946	-6.14274	8.11089e-10	5.72343e-09
312	Zm00001d041791	740.296	-2.51394	0.164482	-15.2839	9.78323e-53	5.77696e-51
313	Zm00001d047632	641.721	-2.51026	0.224715	-11.1709	5.6634e-29	1.45055e-27
314	Zm00001d033595	80.9056	-2.50635	0.459571	-5.45367	4.93399e-08	2.81076e-07
315	Zm00001d049120	1510.39	-2.50198	0.153153	-16.3364	5.43504e-60	3.87756e-58
316	Zm00001d009881	118.813	-2.4977	0.327595	-7.62434	2.45291e-14	2.70742e-13
317	Zm00001d022241	779.239	-2.49607	0.171899	-14.5205	8.98112e-48	4.53386e-46
318	Zm00001d019887	237.393	-2.49483	0.25891	-9.63587	5.6413e-22	1.01741e-20
319	Zm00001d037197	345.761	-2.49393	0.242845	-10.2697	9.654e-25	2.00307e-23
320	Zm00001d048227	67.8101	-2.49309	0.467404	-5.3339	9.6123e-08	5.2765e-07
321	Zm00001d031736	506.049	-2.49197	0.259993	-9.58476	9.26691e-22	1.65545e-20
322	Zm00001d028809	108.668	-2.49024	0.478461	-5.20468	1.9433e-07	1.0271e-06
323	Zm00001d039739	77.2866	-2.48355	0.459952	-5.39959	6.67923e-08	3.75578e-07
324	Zm00001d051008	339.226	-2.48168	0.234937	-10.5632	4.41345e-26	9.81932e-25
325	Zm00001d006207	59.8022	-2.47746	0.458865	-5.3991	6.69761e-08	3.76518e-07
326	Zm00001d010300	252.681	-2.47518	0.252361	-9.80807	1.03934e-22	1.94745e-21
327	Zm00001d017686	2425.29	-2.47443	0.113007	-21.8963	2.81626e-106	4.6491e-104
328	Zm00001d021040	68.3943	-2.47334	0.426104	-5.80455	6.45409e-09	4.121e-08
329	Zm00001d034506	997.872	-2.47227	0.211077	-11.7126	1.09812e-31	3.21698e-30
330	Zm00001d046377	1006.24	-2.47153	0.184549	-13.3923	6.71094e-41	2.75954e-39
331	Zm00001d048663	1309.16	-2.46826	0.150215	-16.4315	1.13858e-60	8.27979e-59
332	Zm00001d033972	264.543	-2.46364	0.272681	-9.03487	1.642e-19	2.5593e-18
333	Zm00001d012555	199.778	-2.46202	0.285873	-8.61229	7.16172e-18	1.01105e-16
334	Zm00001d010171	97.5913	-2.45952	0.399136	-6.16212	7.17786e-10	5.10005e-09
335	Zm00001d029340	448.359	-2.45498	0.186568	-13.1587	1.51714e-39	5.93628e-38
336	Zm00001d052079	3012.44	-2.45194	0.134107	-18.2834	1.12125e-74	1.17399e-72
337	Zm00001d011687	1292.78	-2.45096	0.210642	-11.6357	2.71417e-31	7.76026e-30
338	Zm00001d045615	127.488	-2.45018	0.323272	-7.57931	3.4741e-14	3.78469e-13
339	Zm00001d039542	6841.25	-2.44876	0.184163	-13.2967	2.41975e-40	9.73754e-39
340	Zm00001d031526	1335.37	-2.44704	0.143431	-17.0608	2.90431e-65	2.41485e-63
341	Zm00001d004357	236.441	-2.44588	0.243245	-10.0552	8.71055e-24	1.72352e-22
342	Zm00001d021208	140.574	-2.44362	0.44925	-5.43933	5.34809e-08	3.03367e-07
343	Zm00001d048242	325.34	-2.44318	0.23026	-10.6105	2.66304e-26	6.01072e-25
344	Zm00001d016091	1444.21	-2.44029	0.148711	-16.4096	1.63205e-60	1.17925e-58
345	Zm00001d012323	183.159	-2.43934	0.292731	-8.33305	7.87855e-17	1.04566e-15
346	Zm00001d018987	47.2646	-2.43457	0.531888	-4.57723	4.71179e-06	2.03946e-05
347	Zm00001d046126	65.7989	-2.42867	0.437111	-5.55619	2.75729e-08	1.61929e-07
348	Zm00001d045420	337.195	-2.42788	0.206857	-11.737	8.23458e-32	2.42176e-30
349	Zm00001d015382	333.532	-2.42474	0.259675	-9.3376	9.85391e-21	1.64956e-19
350	Zm00001d000377	131.934	-2.42447	0.31271	-7.75311	8.96691e-15	1.01959e-13
351	Zm00001d010613	168.811	-2.42015	0.30432	-7.95265	1.8256e-15	2.20202e-14
352	Zm00001d053886	404.009	-2.41773	0.193494	-12.4951	7.94177e-36	2.74215e-34
353	Zm00001d015067	73.5015	-2.40948	0.417423	-5.77228	7.82071e-09	4.94335e-08
354	Zm00001d021241	821.632	-2.40915	0.211218	-11.406	3.90205e-30	1.05561e-28
355	Zm00001d006521	88.8006	-2.40551	0.404986	-5.93974	2.85478e-09	1.90678e-08
356	Zm00001d008132	58.4717	-2.39794	0.462355	-5.18637	2.14427e-07	1.12569e-06
357	Zm00001d027636	57.2638	-2.39394	0.501756	-4.77113	1.83199e-06	8.41949e-06
358	Zm00001d014702	314.416	-2.39173	0.239964	-9.96705	2.12437e-23	4.1418e-22
359	Zm00001d012979	5998.23	-2.39147	0.132435	-18.0577	6.86817e-73	6.7535e-71
360	Zm00001d037529	178.417	-2.39043	0.328213	-7.28317	3.26062e-13	3.25573e-12
361	Zm00001d005032	207.203	-2.39005	0.29943	-7.98198	1.44004e-15	1.75568e-14
362	Zm00001d052164	483.394	-2.38879	0.282256	-8.46319	2.60156e-17	3.5444e-16
363	Zm00001d003767	114.424	-2.38071	0.332285	-7.16465	7.7986e-13	7.47661e-12
364	Zm00001d002407	63.9908	-2.37995	0.491352	-4.84367	1.27464e-06	6.00193e-06
365	Zm00001d023501	63.3396	-2.37538	0.483599	-4.91189	9.02022e-07	4.33861e-06
366	Zm00001d002158	571.25	-2.37372	0.208006	-11.4118	3.65234e-30	9.93998e-29
367	Zm00001d001862	1538.06	-2.36946	0.419924	-5.64258	1.6752e-08	1.01273e-07
368	Zm00001d015310	235.121	-2.36922	0.253912	-9.33089	1.04983e-20	1.75614e-19
369	Zm00001d023840	309.046	-2.36078	0.231186	-10.2116	1.75878e-24	3.60621e-23
370	Zm00001d018496	3164.09	-2.36002	0.146912	-16.0641	4.5518e-58	3.07294e-56
371	Zm00001d026094	1146.08	-2.35717	0.190166	-12.3953	2.77005e-35	9.36433e-34
372	Zm00001d012274	91.9915	-2.35068	0.448611	-5.2399	1.60661e-07	8.60208e-07
373	Zm00001d035292	67.6273	-2.35008	0.475458	-4.94278	7.70164e-07	3.73858e-06
374	Zm00001d002195	88.2825	-2.34976	0.387643	-6.06165	1.34735e-09	9.26752e-09
375	Zm00001d019335	2831.5	-2.34775	0.152235	-15.4219	1.1658e-53	7.08756e-52
376	Zm00001d036647	243.006	-2.34575	0.268902	-8.72343	2.69899e-18	3.91285e-17
377	Zm00001d042755	296.545	-2.34451	0.209208	-11.2066	3.78445e-29	9.79281e-28
378	Zm00001d023213	126.728	-2.33587	0.372381	-6.2728	3.54619e-10	2.604e-09
379	Zm00001d011639	164.822	-2.3337	0.3228	-7.22954	4.84633e-13	4.75508e-12
380	Zm00001d008181	2158.72	-2.3298	0.131352	-17.7371	2.16855e-70	2.02661e-68
381	Zm00001d000308	124.431	-2.32747	0.398495	-5.84065	5.19974e-09	3.35226e-08
382	Zm00001d029721	89.4539	-2.32562	0.398056	-5.84245	5.14385e-09	3.31907e-08
383	Zm00001d042935	184.396	-2.32549	0.325999	-7.1334	9.79164e-13	9.30062e-12
384	Zm00001d027488	864.004	-2.32364	0.154188	-15.0701	2.54593e-51	1.44523e-49
385	Zm00001d019243	1591.26	-2.32242	0.206365	-11.254	2.21373e-29	5.78794e-28
386	Zm00001d033330	516.063	-2.31918	0.217477	-10.664	1.49927e-26	3.42846e-25
387	Zm00001d053006	525.477	-2.31779	0.189103	-12.2567	1.5463e-34	5.08301e-33
388	Zm00001d041700	1763.42	-2.3159	0.169317	-13.6779	1.37565e-42	5.93736e-41
389	Zm00001d017567	84.3566	-2.31284	0.433452	-5.33587	9.50881e-08	5.2235e-07
390	Zm00001d021457	50.1061	-2.31097	0.492612	-4.69126	2.71533e-06	1.21869e-05
391	Zm00001d046676	513.821	-2.30433	0.217993	-10.5706	4.0768e-26	9.11076e-25
392	Zm00001d037562	640.679	-2.30405	0.187283	-12.3025	8.78059e-35	2.90749e-33
393	ZeamMp044	118.651	-2.30066	0.367049	-6.268	3.65725e-10	2.68285e-09
394	Zm00001d029028	2395.22	-2.29274	0.540796	-4.23957	2.23946e-05	8.64883e-05
395	Zm00001d035157	418.755	-2.29247	0.198737	-11.5352	8.76864e-31	2.4635e-29
396	Zm00001d048166	231.081	-2.28973	0.372281	-6.15055	7.72169e-10	5.46585e-09
397	Zm00001d050443	389.808	-2.28484	0.232467	-9.82866	8.47404e-23	1.59177e-21
398	Zm00001d047150	99.38	-2.28387	0.40375	-5.65666	1.54347e-08	9.37858e-08
399	Zm00001d028451	75.4681	-2.2809	0.401797	-5.67674	1.37285e-08	8.42104e-08
400	Zm00001d005451	7502.1	-2.27766	0.103107	-22.0903	3.92001e-108	6.71629e-106
401	Zm00001d021202	1871.12	-2.27754	0.124148	-18.3454	3.59495e-75	3.78155e-73
402	Zm00001d023559	169.919	-2.26886	0.283	-8.01719	1.08191e-15	1.3327e-14
403	Zm00001d008398	444.11	-2.26203	0.198247	-11.4102	3.72014e-30	1.01002e-28
404	Zm00001d039222	320.03	-2.26184	0.232055	-9.747	1.90006e-22	3.51651e-21
405	Zm00001d033901	192.095	-2.26169	0.28759	-7.86428	3.71217e-15	4.35448e-14
406	Zm00001d042543	2374.39	-2.26085	0.189067	-11.9579	5.90352e-33	1.83147e-31
407	Zm00001d020306	448.403	-2.25886	0.220503	-10.2441	1.25781e-24	2.59549e-23
408	Zm00001d001703	54.4386	-2.25536	0.501805	-4.4945	6.9734e-06	2.93798e-05
409	Zm00001d017002	407.849	-2.25432	0.328102	-6.87079	6.38454e-12	5.62716e-11
410	Zm00001d029983	7007.51	-2.2526	0.132887	-16.9513	1.88356e-64	1.52138e-62
411	Zm00001d033313	184.321	-2.25121	0.295118	-7.62816	2.38126e-14	2.6309e-13
412	Zm00001d035115	529.003	-2.25059	0.171028	-13.1592	1.50634e-39	5.90422e-38
413	Zm00001d051934	203.535	-2.24987	0.346292	-6.49703	8.19217e-11	6.45105e-10
414	Zm00001d039300	537.267	-2.24688	0.199517	-11.2616	2.03122e-29	5.32306e-28
415	Zm00001d005785	2640.92	-2.24202	0.140137	-15.9987	1.30414e-57	8.72615e-56
416	Zm00001d030282	1758.24	-2.24191	0.149624	-14.9836	9.39741e-51	5.23477e-49
417	Zm00001d003422	95.6897	-2.24169	0.404807	-5.53767	3.06514e-08	1.7894e-07
418	Zm00001d007147	82.1141	-2.23829	0.382395	-5.85333	4.81826e-09	3.11877e-08
419	Zm00001d018802	160.3	-2.23779	0.306256	-7.30691	2.73358e-13	2.75379e-12
420	Zm00001d027749	629.524	-2.23729	0.200107	-11.1805	5.08051e-29	1.30421e-27
421	Zm00001d028557	4115.05	-2.23528	0.163323	-13.6863	1.22648e-42	5.30366e-41
422	Zm00001d033987	215.343	-2.23315	0.365414	-6.1113	9.88242e-10	6.91311e-09
423	Zm00001d020725	50.9996	-2.23289	0.473627	-4.71444	2.42375e-06	1.09456e-05
424	Zm00001d005736	3879.57	-2.23241	0.144052	-15.4972	3.62437e-54	2.22741e-52
425	Zm00001d009034	163.672	-2.23027	0.327107	-6.81816	9.22121e-12	7.99643e-11
426	Zm00001d005776	76.7095	-2.22908	0.411328	-5.41924	5.98534e-08	3.37735e-07
427	Zm00001d007564	42.4084	-2.22718	0.504941	-4.41078	1.02998e-05	4.2184e-05
428	Zm00001d044801	77.7577	-2.22177	0.452351	-4.91162	9.03278e-07	4.34372e-06
429	Zm00001d018703	1729.64	-2.21784	0.131101	-16.9171	3.36848e-64	2.67303e-62
430	Zm00001d031923	134.229	-2.21762	0.319665	-6.93732	3.9961e-12	3.57358e-11
431	Zm00001d011064	223.332	-2.21291	0.295129	-7.49811	6.47449e-14	6.89068e-13
432	Zm00001d011551	431.747	-2.21042	0.216769	-10.1971	2.04254e-24	4.16915e-23
433	Zm00001d051877	175.377	-2.20726	0.352944	-6.25387	4.00415e-10	2.92217e-09
434	Zm00001d040644	257.281	-2.20618	0.242126	-9.1117	8.11015e-20	1.28625e-18
435	Zm00001d038149	5195.27	-2.205	0.108016	-20.4136	1.2659e-92	1.77824e-90
436	Zm00001d009820	194.388	-2.20343	0.297981	-7.39453	1.41912e-13	1.46619e-12
437	Zm00001d039293	2402.21	-2.20342	0.151139	-14.5787	3.83538e-48	1.97588e-46
438	Zm00001d028406	241.365	-2.20019	0.274212	-8.02371	1.02597e-15	1.26517e-14
439	Zm00001d048983	718.438	-2.20006	0.185978	-11.8297	2.74273e-32	8.22674e-31
440	Zm00001d048649	454.104	-2.19991	0.226675	-9.70513	2.8672e-22	5.25909e-21
441	Zm00001d051532	122.25	-2.19762	0.324496	-6.77242	1.26644e-11	1.08e-10
442	Zm00001d012419	70.5154	-2.19605	0.432754	-5.07459	3.8833e-07	1.96432e-06
443	Zm00001d002600	955.872	-2.1938	0.163234	-13.4396	3.54377e-41	1.47327e-39
444	Zm00001d042631	158.145	-2.18852	0.330249	-6.62688	3.4285e-11	2.8104e-10
445	Zm00001d044112	70.1406	-2.18451	0.394134	-5.54256	2.98088e-08	1.74335e-07
446	Zm00001d045581	1641.15	-2.18366	0.129599	-16.8493	1.06123e-63	8.27609e-62
447	Zm00001d028368	857.328	-2.18092	0.151821	-14.365	8.57842e-47	4.19027e-45
448	Zm00001d038760	46.1211	-2.18056	0.485522	-4.49117	7.08337e-06	2.97599e-05
449	Zm00001d007213	2444.26	-2.17801	0.126476	-17.2207	1.85586e-66	1.5779e-64
450	Zm00001d013958	173.327	-2.17707	0.325233	-6.69388	2.17324e-11	1.81299e-10
451	Zm00001d051990	185.576	-2.17695	0.28559	-7.62262	2.48575e-14	2.74233e-13
452	Zm00001d027522	83.1741	-2.17644	0.420709	-5.17327	2.30036e-07	1.20345e-06
453	Zm00001d002299	75.0091	-2.17617	0.455744	-4.77499	1.79717e-06	8.27123e-06
454	Zm00001d021278	980.701	-2.17511	0.150321	-14.4698	1.88099e-47	9.39082e-46
455	Zm00001d048215	327.061	-2.1747	0.26672	-8.15348	3.5361e-16	4.50528e-15
456	Zm00001d008007	241.895	-2.16923	0.252426	-8.59353	8.4339e-18	1.18768e-16
457	Zm00001d045785	291.081	-2.16866	0.236929	-9.1532	5.52726e-20	8.84674e-19
458	Zm00001d006169	97.8729	-2.1683	0.549581	-3.94537	7.96757e-05	0.000279631
459	Zm00001d044079	572.302	-2.16635	0.184722	-11.7276	9.20068e-32	2.70237e-30
460	Zm00001d053816	2521.04	-2.16289	0.128249	-16.8648	8.17173e-64	6.39488e-62
461	Zm00001d049244	1007.2	-2.15846	0.560252	-3.85266	0.00011684	0.00039754
462	Zm00001d034096	56.3976	-2.15784	0.450672	-4.78806	1.68405e-06	7.78544e-06
463	Zm00001d019768	422.77	-2.15623	0.214673	-10.0443	9.73512e-24	1.91952e-22
464	Zm00001d034613	141.806	-2.15441	0.285974	-7.53358	4.93691e-14	5.31935e-13
465	Zm00001d011193	769.995	-2.15416	0.173434	-12.4207	2.01863e-35	6.85486e-34
466	Zm00001d020869	226.304	-2.15277	0.320805	-6.71053	1.93914e-11	1.62549e-10
467	Zm00001d015515	163.407	-2.14627	0.300565	-7.14079	9.27947e-13	8.84385e-12
468	Zm00001d018788	1085.43	-2.14529	0.165538	-12.9595	2.07584e-38	7.87706e-37
469	Zm00001d037695	795.513	-2.13899	0.168836	-12.669	8.78063e-37	3.17732e-35
470	Zm00001d029049	426.053	-2.13845	0.230015	-9.29698	1.44492e-20	2.38876e-19
471	Zm00001d012339	99.1133	-2.13789	0.404894	-5.28012	1.29097e-07	6.98649e-07
472	Zm00001d026263	6646.73	-2.1348	0.100838	-21.1706	1.78427e-99	2.70826e-97
473	Zm00001d032459	169.111	-2.13414	0.282312	-7.55952	4.04553e-14	4.37978e-13
474	Zm00001d038471	761.102	-2.1325	0.733567	-2.90703	0.00364877	0.00905724
475	Zm00001d017418	564.549	-2.13156	0.195626	-10.8961	1.20323e-27	2.89491e-26
476	Zm00001d039944	146	-2.13109	0.496043	-4.29618	1.73767e-05	6.83346e-05
477	Zm00001d034356	1234.91	-2.13029	0.13713	-15.5348	2.0185e-54	1.24728e-52
478	Zm00001d016164	1795.95	-2.12751	0.147312	-14.4422	2.80549e-47	1.39142e-45
479	Zm00001d005813	4902.85	-2.12511	0.133153	-15.9599	2.42929e-57	1.61117e-55
480	Zm00001d017477	146.996	-2.12373	0.330523	-6.42535	1.31565e-10	1.01138e-09
481	Zm00001d043923	857.319	-2.12186	0.168911	-12.562	3.4144e-36	1.19907e-34
482	Zm00001d013199	593.355	-2.12031	0.160717	-13.1928	9.65266e-40	3.80985e-38
483	Zm00001d015175	201.923	-2.11871	0.346883	-6.10786	1.00974e-09	7.05475e-09
484	Zm00001d038853	156.77	-2.11697	0.333994	-6.33835	2.32235e-10	1.74377e-09
485	Zm00001d022210	114.849	-2.11528	0.450273	-4.69777	2.63015e-06	1.1821e-05
486	Zm00001d002618	267.715	-2.11282	0.308597	-6.84653	7.56644e-12	6.63009e-11
487	Zm00001d039931	270.929	-2.11161	0.240917	-8.76487	1.86991e-18	2.74967e-17
488	Zm00001d008222	304.326	-2.11104	0.209281	-10.0871	6.30042e-24	1.25542e-22
489	Zm00001d047182	103.32	-2.11082	0.35464	-5.95202	2.64852e-09	1.77321e-08
490	Zm00001d018002	85.9852	-2.10988	0.366613	-5.75506	8.661e-09	5.44709e-08
491	Zm00001d047077	887.494	-2.10961	0.171677	-12.2883	1.04696e-34	3.45162e-33
492	Zm00001d032576	292.893	-2.10786	0.227313	-9.27293	1.81103e-20	2.98095e-19
493	Zm00001d046471	165.665	-2.10659	0.363146	-5.80095	6.5942e-09	4.20571e-08
494	Zm00001d036740	185.839	-2.10644	0.259802	-8.10789	5.15045e-16	6.50741e-15
495	Zm00001d026047	605.134	-2.10615	0.160139	-13.152	1.65675e-39	6.44906e-38
496	Zm00001d039647	108.447	-2.10569	0.403298	-5.22119	1.7778e-07	9.4671e-07
497	Zm00001d009631	3673.73	-2.10377	0.122862	-17.123	9.99216e-66	8.43219e-64
498	Zm00001d010360	415.073	-2.10368	0.212794	-9.88597	4.78911e-23	9.13242e-22
499	Zm00001d012291	365.697	-2.10249	0.198131	-10.6116	2.63077e-26	5.94381e-25
500	Zm00001d028746	226.146	-2.10119	0.267353	-7.85924	3.86468e-15	4.51698e-14
501	Zm00001d034772	5820.16	-2.10081	0.123842	-16.9636	1.52645e-64	1.23735e-62
502	Zm00001d024071	62.634	-2.09653	0.514264	-4.07677	4.56658e-05	0.000167197
503	Zm00001d004772	620.602	-2.09578	0.198237	-10.5721	4.01575e-26	8.98321e-25
504	Zm00001d039426	85.3882	-2.09479	0.412157	-5.08251	3.72483e-07	1.89178e-06
505	Zm00001d036003	116.381	-2.09399	0.510402	-4.10263	4.08483e-05	0.000151026
506	Zm00001d031175	176.363	-2.09247	0.275265	-7.60166	2.92353e-14	3.21431e-13
507	Zm00001d038310	7221.91	-2.09059	0.118937	-17.5773	3.67719e-69	3.32653e-67
508	Zm00001d017609	2258.63	-2.0897	0.135787	-15.3895	1.92418e-53	1.16046e-51
509	Zm00001d011931	767.337	-2.08934	0.172781	-12.0924	1.15782e-33	3.69847e-32
510	Zm00001d013222	2216.26	-2.08812	0.187493	-11.1371	8.27844e-29	2.08724e-27
511	Zm00001d017101	511.376	-2.08462	0.254746	-8.18313	2.76567e-16	3.54181e-15
512	Zm00001d011712	104.598	-2.08199	0.377651	-5.51299	3.52793e-08	2.04531e-07
513	Zm00001d024687	190.011	-2.07861	0.290255	-7.16135	7.9889e-13	7.64932e-12
514	Zm00001d040115	88.6348	-2.07772	0.363611	-5.71413	1.10267e-08	6.84355e-08
515	Zm00001d041377	59.8376	-2.07528	0.558186	-3.71789	0.000200891	0.000652311
516	Zm00001d050908	64.0997	-2.07408	0.458307	-4.52552	6.02458e-06	2.56016e-05
517	Zm00001d010496	505.238	-2.07395	0.190024	-10.9141	9.86492e-28	2.3836e-26
518	Zm00001d052152	126.628	-2.06941	0.333079	-6.21299	5.19862e-10	3.7551e-09
519	Zm00001d012019	35.3392	-2.06917	0.540709	-3.82677	0.000129836	0.000438004
520	Zm00001d042438	81.9934	-2.06714	0.400942	-5.15572	2.52663e-07	1.31271e-06
521	Zm00001d000229	88.4468	-2.06546	0.476269	-4.33676	1.44601e-05	5.75856e-05
522	Zm00001d027353	664.439	-2.06452	0.208871	-9.8842	4.87479e-23	9.28796e-22
523	Zm00001d031509	297.919	-2.0644	0.259749	-7.94769	1.90025e-15	2.28717e-14
524	Zm00001d029606	58.5422	-2.06091	0.494624	-4.16662	3.09155e-05	0.00011696
525	Zm00001d007686	108.098	-2.05883	0.324749	-6.33977	2.30108e-10	1.73067e-09
526	Zm00001d020686	270.061	-2.05827	0.227664	-9.04084	1.55467e-19	2.4282e-18
527	Zm00001d014649	420.553	-2.05293	0.208439	-9.84911	6.91556e-23	1.30662e-21
528	Zm00001d047204	5355.12	-2.04791	0.125337	-16.3392	5.19444e-60	3.71764e-58
529	Zm00001d054052	1403.54	-2.04563	0.146313	-13.9812	2.02972e-44	9.25485e-43
530	Zm00001d021692	642.206	-2.044	0.195337	-10.464	1.26458e-25	2.75793e-24
531	Zm00001d018792	432.341	-2.04277	0.192828	-10.5937	3.18599e-26	7.15534e-25
532	Zm00001d029656	167.719	-2.04189	0.273819	-7.45707	8.84647e-14	9.3272e-13
533	Zm00001d044293	73.9888	-2.04115	0.450455	-4.53131	5.86198e-06	2.49575e-05
534	Zm00001d024568	777.323	-2.0384	0.192307	-10.5997	2.98942e-26	6.72725e-25
535	Zm00001d052639	472.959	-2.03623	0.196011	-10.3883	2.80219e-25	5.97871e-24
536	ZeamMp020	41.5973	-2.0327	0.533742	-3.8084	0.000139868	0.000468006
537	Zm00001d034145	194.103	-2.03261	0.277314	-7.32963	2.30791e-13	2.34e-12
538	Zm00001d031463	676.804	-2.02822	0.200508	-10.1154	4.72015e-24	9.45535e-23
539	Zm00001d033867	582.855	-2.02523	0.211575	-9.57217	1.04686e-21	1.86424e-20
540	Zm00001d016008	534.338	-2.02347	0.181153	-11.17	5.72011e-29	1.46176e-27
541	Zm00001d006307	1220.63	-2.02216	0.13369	-15.1258	1.09542e-51	6.30384e-50
542	Zm00001d035184	379.879	-2.02133	0.214645	-9.41708	4.63807e-21	7.92255e-20
543	Zm00001d045124	1274.65	-2.02034	0.170427	-11.8546	2.03746e-32	6.18512e-31
544	Zm00001d028408	324.507	-2.01919	0.258564	-7.80923	5.75379e-15	6.64595e-14
545	Zm00001d028007	1208.77	-2.01413	0.184881	-10.8942	1.22846e-27	2.95249e-26
546	Zm00001d017294	62.3338	-2.01111	0.527087	-3.81552	0.000135898	0.000456003
547	Zm00001d006476	519.673	-2.00999	0.205953	-9.75949	1.67998e-22	3.12197e-21
548	Zm00001d021836	583.042	-2.00858	0.500823	-4.01055	6.05769e-05	0.000216842
549	Zm00001d043523	66.4786	-2.00699	0.478429	-4.19497	2.72911e-05	0.000104259
550	Zm00001d040991	91.7512	-2.00282	0.415877	-4.8159	1.46539e-06	6.83326e-06
551	Zm00001d003459	207.884	-2.00102	0.241831	-8.27446	1.29041e-16	1.68304e-15
552	Zm00001d053897	63.8057	-1.99738	0.410584	-4.86475	1.14604e-06	5.43943e-06
553	Zm00001d025581	869.401	-1.99673	0.175484	-11.3784	5.35701e-30	1.43378e-28
554	Zm00001d043338	54.7513	-1.99167	0.52567	-3.78881	0.00015137	0.000502626
555	Zm00001d005901	156.115	-1.99008	0.348939	-5.70323	1.17555e-08	7.27747e-08
556	Zm00001d042880	1081.75	-1.98809	0.157755	-12.6024	2.04702e-36	7.26773e-35
557	Zm00001d031148	112.829	-1.98214	0.33027	-6.00158	1.95402e-09	1.3251e-08
558	Zm00001d049121	170.743	-1.97963	0.348209	-5.68517	1.30679e-08	8.04419e-08
559	Zm00001d029288	160.514	-1.97851	0.321657	-6.151	7.69982e-10	5.45207e-09
560	Zm00001d043853	55.8055	-1.97719	0.429959	-4.59856	4.25428e-06	1.85278e-05
561	Zm00001d014553	607.858	-1.97377	0.16059	-12.2907	1.01584e-34	3.35392e-33
562	Zm00001d011915	304.178	-1.97271	0.259486	-7.60239	2.90722e-14	3.19794e-13
563	Zm00001d043024	72.0548	-1.97022	0.437276	-4.50568	6.61609e-06	2.79525e-05
564	Zm00001d016477	478.718	-1.96991	0.184344	-10.6861	1.18268e-26	2.721e-25
565	Zm00001d045390	52.8333	-1.96889	0.443262	-4.44183	8.91973e-06	3.69399e-05
566	Zm00001d054012	879.314	-1.96708	0.149496	-13.1581	1.52968e-39	5.97502e-38
567	Zm00001d034457	570.968	-1.96377	0.175558	-11.1859	4.78163e-29	1.22888e-27
568	Zm00001d008133	95.7449	-1.96292	0.419362	-4.68072	2.85866e-06	1.27719e-05
569	Zm00001d011746	427.164	-1.9574	0.197944	-9.88865	4.66252e-23	8.90605e-22
570	Zm00001d007885	157.836	-1.95151	0.294691	-6.62222	3.53846e-11	2.89844e-10
571	Zm00001d048681	233.58	-1.94995	0.296733	-6.57141	4.98398e-11	4.03428e-10
572	Zm00001d008514	801.054	-1.94992	0.152159	-12.815	1.35058e-37	4.99098e-36
573	Zm00001d049384	191.862	-1.94937	0.274588	-7.09925	1.25431e-12	1.17854e-11
574	Zm00001d018003	68.0451	-1.94508	0.401421	-4.84548	1.26308e-06	5.95246e-06
575	Zm00001d049161	130.025	-1.94463	0.316868	-6.13703	8.40794e-10	5.92749e-09
576	Zm00001d030815	53.8937	-1.93956	0.468024	-4.14414	3.41091e-05	0.000127993
577	Zm00001d021386	312.589	-1.93459	0.307394	-6.29353	3.10327e-10	2.29733e-09
578	Zm00001d044132	349.256	-1.93356	0.233332	-8.2867	1.16436e-16	1.52568e-15
579	Zm00001d048201	5827.43	-1.9316	0.119821	-16.1207	1.82517e-58	1.24331e-56
580	Zm00001d026056	459.032	-1.93118	0.216199	-8.93241	4.16826e-19	6.36526e-18
581	Zm00001d045295	233.61	-1.92972	0.23771	-8.11798	4.74016e-16	5.99908e-15
582	Zm00001d032042	691.684	-1.92929	0.238846	-8.07755	6.60821e-16	8.29121e-15
583	Zm00001d028008	383.351	-1.92909	0.218715	-8.82012	1.14334e-18	1.70454e-17
584	Zm00001d005378	133.468	-1.92867	0.337835	-5.70891	1.137e-08	7.04889e-08
585	Zm00001d046119	107.473	-1.92644	0.382196	-5.04046	4.6441e-07	2.32061e-06
586	Zm00001d031412	494.922	-1.92534	0.19003	-10.1318	3.99385e-24	8.04317e-23
587	Zm00001d016948	213.838	-1.9229	0.311798	-6.16714	6.95351e-10	4.95153e-09
588	Zm00001d027315	76.1437	-1.92227	0.381116	-5.04381	4.56352e-07	2.28186e-06
589	Zm00001d013703	2188.98	-1.91918	0.137393	-13.9686	2.42498e-44	1.10127e-42
590	Zm00001d021949	62.8419	-1.91875	0.406166	-4.72405	2.31194e-06	1.04678e-05
591	Zm00001d033612	51.074	-1.91841	0.507021	-3.78368	0.000154524	0.000512357
592	Zm00001d006368	1145.61	-1.91633	0.174011	-11.0127	3.32014e-28	8.19742e-27
593	Zm00001d011002	76.8866	-1.91547	0.661729	-2.89464	0.00379591	0.00937823
594	Zm00001d013346	1579.88	-1.9152	0.133598	-14.3355	1.31313e-46	6.34569e-45
595	Zm00001d005173	1996.54	-1.91403	0.114856	-16.6646	2.37163e-62	1.80595e-60
596	Zm00001d003806	730.003	-1.91329	0.2072	-9.23403	2.60646e-20	4.24389e-19
597	Zm00001d023316	1542.26	-1.91185	0.151112	-12.6519	1.09237e-36	3.91522e-35
598	Zm00001d027659	1408.66	-1.91152	0.156332	-12.2273	2.22224e-34	7.26273e-33
599	Zm00001d035920	880.055	-1.91088	0.144792	-13.1974	9.07767e-40	3.58917e-38
600	Zm00001d050294	55.011	-1.91088	0.540872	-3.53296	0.000410929	0.00125183
601	Zm00001d007190	326.625	-1.91078	0.279613	-6.83364	8.27846e-12	7.21486e-11
602	Zm00001d052961	382.727	-1.91064	0.232766	-8.20843	2.24107e-16	2.88799e-15
603	Zm00001d034455	460.374	-1.90988	0.17679	-10.8031	3.32865e-27	7.83359e-26
604	Zm00001d012398	1938.14	-1.90872	0.170813	-11.1744	5.44384e-29	1.39589e-27
605	Zm00001d015125	409.609	-1.908	0.256316	-7.44394	9.77238e-14	1.02472e-12
606	Zm00001d027888	251.387	-1.90644	0.228416	-8.34634	7.04117e-17	9.39488e-16
607	Zm00001d053416	475.548	-1.90628	0.192746	-9.89012	4.59469e-23	8.78391e-22
608	Zm00001d015815	100.391	-1.90625	0.400102	-4.76441	1.89403e-06	8.68343e-06
609	Zm00001d009835	37.5411	-1.9011	0.546109	-3.48118	0.000499218	0.00149382
610	Zm00001d003742	569.344	-1.89846	0.239063	-7.94123	2.00187e-15	2.40565e-14
611	Zm00001d020899	46.092	-1.896	0.547439	-3.46339	0.000533406	0.00158647
612	Zm00001d008581	984.487	-1.89196	0.191061	-9.90237	4.06533e-23	7.81151e-22
613	Zm00001d011688	1509.29	-1.89175	0.128742	-14.6941	7.02869e-49	3.68819e-47
614	Zm00001d012290	228.507	-1.88771	0.264833	-7.12793	1.01888e-12	9.66165e-12
615	Zm00001d048381	203.969	-1.88589	0.262803	-7.17605	7.1756e-13	6.91156e-12
616	Zm00001d051739	97.1407	-1.883	0.391922	-4.80453	1.55119e-06	7.2125e-06
617	Zm00001d052594	583.807	-1.87965	0.19491	-9.64372	5.22592e-22	9.44004e-21
618	Zm00001d021688	108.962	-1.87716	0.347421	-5.40312	6.54933e-08	3.6864e-07
619	Zm00001d026111	35023	-1.87643	0.0958862	-19.5693	2.82439e-85	3.45277e-83
620	Zm00001d050607	54.9901	-1.87465	0.493124	-3.80157	0.000143783	0.000479615
621	Zm00001d030909	112.282	-1.8707	0.336355	-5.56168	2.67191e-08	1.57324e-07
622	Zm00001d022277	286.489	-1.86944	0.22591	-8.27516	1.28282e-16	1.6741e-15
623	Zm00001d008229	302.783	-1.86903	0.253591	-7.37026	1.70298e-13	1.74749e-12
624	Zm00001d040726	689.145	-1.86589	0.179375	-10.4022	2.42324e-25	5.2095e-24
625	Zm00001d007815	5213.43	-1.86588	0.13699	-13.6205	3.02465e-42	1.28582e-40
626	Zm00001d037977	172.94	-1.86432	0.322596	-5.77912	7.50916e-09	4.75573e-08
627	Zm00001d021843	139.26	-1.8616	0.386668	-4.81447	1.47595e-06	6.88106e-06
628	Zm00001d017866	1161.21	-1.85979	0.174355	-10.6667	1.45668e-26	3.33781e-25
629	Zm00001d037361	117.035	-1.85834	0.304271	-6.1075	1.01203e-09	7.06858e-09
630	Zm00001d039513	1431.36	-1.85819	0.129792	-14.3167	1.72083e-46	8.28047e-45
631	Zm00001d031325	103.569	-1.85784	0.41309	-4.49742	6.87836e-06	2.90009e-05
632	Zm00001d004075	403.54	-1.85776	0.229689	-8.08816	6.05738e-16	7.61922e-15
633	Zm00001d043296	1813.21	-1.85628	0.129684	-14.3138	1.79361e-46	8.61238e-45
634	Zm00001d018086	296.598	-1.85444	0.211637	-8.76234	1.91235e-18	2.80478e-17
635	Zm00001d006010	27636.5	-1.85381	0.113657	-16.3106	8.29319e-60	5.87959e-58
636	Zm00001d039680	119.347	-1.84937	0.302699	-6.1096	9.98835e-10	6.98505e-09
637	Zm00001d017199	483.464	-1.84298	0.177851	-10.3625	3.67231e-25	7.76923e-24
638	Zm00001d038619	109.886	-1.84056	0.32214	-5.71355	1.10644e-08	6.86507e-08
639	Zm00001d011419	60.9958	-1.84016	0.425474	-4.32497	1.52549e-05	6.05485e-05
640	Zm00001d003310	1000.25	-1.84001	0.21462	-8.57331	1.0055e-17	1.4107e-16
641	Zm00001d009964	125.823	-1.83859	0.305768	-6.01303	1.8209e-09	1.23683e-08
642	Zm00001d010862	3012.75	-1.83748	0.110512	-16.627	4.44007e-62	3.34722e-60
643	Zm00001d043771	288.267	-1.82984	0.254305	-7.19545	6.22567e-13	6.02393e-12
644	Zm00001d017712	66.3506	-1.8294	0.409237	-4.47026	7.81238e-06	3.26107e-05
645	Zm00001d049259	237.674	-1.82609	0.222881	-8.19312	2.54548e-16	3.26538e-15
646	Zm00001d019866	562.995	-1.82489	0.17652	-10.3381	4.73653e-25	9.91864e-24
647	Zm00001d033407	588.715	-1.82452	0.231361	-7.88602	3.11978e-15	3.67867e-14
648	Zm00001d003757	1432.26	-1.82269	0.496232	-3.67306	0.000239661	0.000765885
649	Zm00001d047283	8271.27	-1.8218	0.098027	-18.5847	4.27179e-77	4.64475e-75
650	Zm00001d038991	941.681	-1.82177	0.149664	-12.1724	4.36179e-34	1.41008e-32
651	Zm00001d038017	430.997	-1.82159	0.22672	-8.03455	9.39236e-16	1.16393e-14
652	Zm00001d020976	759.963	-1.82064	0.226798	-8.02761	9.93894e-16	1.22897e-14
653	Zm00001d048178	1167.36	-1.81962	0.407955	-4.46034	8.18294e-06	3.40569e-05
654	Zm00001d044419	124.119	-1.81871	0.367884	-4.94369	7.6657e-07	3.72273e-06
655	Zm00001d026379	285.755	-1.81698	0.234206	-7.75804	8.62521e-15	9.8172e-14
656	Zm00001d013311	213.261	-1.81683	0.266747	-6.81108	9.68681e-12	8.3777e-11
657	Zm00001d008392	70.6612	-1.81073	0.425315	-4.25739	2.06829e-05	8.03579e-05
658	Zm00001d012935	2284.07	-1.80899	0.113797	-15.8966	6.68744e-57	4.38386e-55
659	Zm00001d015182	62.7678	-1.80889	0.416594	-4.34208	1.41137e-05	5.63255e-05
660	Zm00001d007814	51.3486	-1.80704	0.511626	-3.53195	0.000412503	0.00125612
661	Zm00001d043705	781.618	-1.80529	0.167084	-10.8047	3.27022e-27	7.71213e-26
662	ZeamMp046	38.7236	-1.80512	0.543975	-3.31839	0.000905372	0.0025688
663	Zm00001d010343	1163.39	-1.80356	0.126529	-14.2541	4.22517e-46	2.00328e-44
664	Zm00001d007712	158.527	-1.80252	0.316522	-5.69479	1.23522e-08	7.62643e-08
665	Zm00001d025964	200.837	-1.79762	0.28562	-6.29373	3.0993e-10	2.29515e-09
666	Zm00001d033684	1217.45	-1.79352	0.129425	-13.8576	1.14398e-43	5.10301e-42
667	Zm00001d038222	707.833	-1.79305	0.180697	-9.92294	3.30877e-23	6.40678e-22
668	Zm00001d037818	454.922	-1.79018	0.201927	-8.86547	7.61841e-19	1.14712e-17
669	Zm00001d049097	824.155	-1.78868	0.172156	-10.3899	2.75676e-25	5.88733e-24
670	Zm00001d017422	62.8679	-1.78863	0.432989	-4.1309	3.61351e-05	0.000135079
671	Zm00001d028118	732.583	-1.7852	0.243097	-7.34359	2.07942e-13	2.11647e-12
672	Zm00001d010662	1042.04	-1.78323	0.179174	-9.95252	2.4588e-23	4.77324e-22
673	Zm00001d031619	123.407	-1.78164	0.316443	-5.6302	1.79999e-08	1.08412e-07
674	Zm00001d018470	487.016	-1.78143	0.195384	-9.11762	7.67948e-20	1.21966e-18
675	Zm00001d006721	95.8508	-1.7793	0.382904	-4.64685	3.37039e-06	1.4949e-05
676	Zm00001d018075	216.224	-1.77835	0.267824	-6.64002	3.13644e-11	2.57941e-10
677	Zm00001d008214	313.19	-1.77627	0.208171	-8.5327	1.4297e-17	1.98247e-16
678	Zm00001d050133	2576.8	-1.77351	0.163864	-10.823	2.67751e-27	6.33415e-26
679	Zm00001d026231	2581.39	-1.77328	0.123855	-14.3175	1.70211e-46	8.20785e-45
680	Zm00001d013339	1077.69	-1.77169	0.145831	-12.1489	5.8112e-34	1.8695e-32
681	Zm00001d037983	1030.64	-1.77073	0.162138	-10.9212	9.1326e-28	2.21138e-26
682	Zm00001d002262	391.13	-1.76598	0.198219	-8.90926	5.13751e-19	7.82424e-18
683	Zm00001d015215	78.1993	-1.76567	0.405391	-4.35547	1.3278e-05	5.32629e-05
684	Zm00001d030253	389.902	-1.76499	0.208639	-8.45955	2.68407e-17	3.65241e-16
685	Zm00001d025517	1621.16	-1.76456	0.138755	-12.7171	4.7537e-37	1.74529e-35
686	Zm00001d000617	41.3472	-1.76346	0.552639	-3.19098	0.00141793	0.00384876
687	Zm00001d018901	544.046	-1.76195	0.194702	-9.04945	1.43684e-19	2.24728e-18
688	Zm00001d023785	656.964	-1.76027	0.20623	-8.53545	1.39616e-17	1.93834e-16
689	Zm00001d053675	6896.15	-1.75988	0.111828	-15.7373	8.38981e-56	5.40581e-54
690	Zm00001d033020	13508	-1.75919	0.124851	-14.0903	4.35743e-45	2.02356e-43
691	Zm00001d045123	207.153	-1.75904	0.326506	-5.38748	7.1452e-08	4.00188e-07
692	Zm00001d007567	52.5905	-1.75904	0.479516	-3.66836	0.000244114	0.000778907
693	Zm00001d045021	2351.94	-1.75836	0.118053	-14.8946	3.57318e-50	1.94257e-48
694	Zm00001d041553	19772.8	-1.75327	0.122096	-14.3598	9.25489e-47	4.51096e-45
695	Zm00001d013258	120.01	-1.75205	0.346416	-5.05766	4.24439e-07	2.13314e-06
696	Zm00001d025885	57.4361	-1.75173	0.498156	-3.51643	0.000437391	0.00132548
697	Zm00001d017592	206.108	-1.75147	0.337158	-5.1948	2.04936e-07	1.07937e-06
698	Zm00001d024037	36.2502	-1.75026	0.538374	-3.25102	0.00114994	0.00318862
699	Zm00001d037198	187.743	-1.74946	0.259438	-6.74329	1.5484e-11	1.30911e-10
700	Zm00001d052060	2029.39	-1.74841	0.181126	-9.65303	4.77238e-22	8.63456e-21
701	Zm00001d043851	2751.89	-1.74827	0.126144	-13.8593	1.11768e-43	4.99555e-42
702	Zm00001d039179	2408	-1.74661	0.169053	-10.3317	5.06542e-25	1.05878e-23
703	Zm00001d015091	141.833	-1.74608	0.460352	-3.79292	0.000148884	0.00049488
704	Zm00001d051562	600.634	-1.74497	0.223524	-7.80662	5.87423e-15	6.77468e-14
705	Zm00001d014127	332.014	-1.74489	0.273442	-6.38121	1.75698e-10	1.33476e-09
706	Zm00001d051453	662.372	-1.74351	0.159047	-10.9623	5.80152e-28	1.42153e-26
707	Zm00001d024386	55.3046	-1.74019	0.543122	-3.20405	0.00135509	0.00369549
708	Zm00001d036641	4086.99	-1.73916	0.111483	-15.6002	7.26119e-55	4.52394e-53
709	Zm00001d015126	129.379	-1.73844	0.425171	-4.08881	4.33589e-05	0.000159552
710	Zm00001d033797	539.236	-1.73656	0.257161	-6.75283	1.44987e-11	1.22902e-10
711	Zm00001d020042	1427.77	-1.73638	0.184239	-9.42461	4.31725e-21	7.41374e-20
712	Zm00001d042202	57.2335	-1.73594	0.513034	-3.38368	0.000715216	0.00207536
713	Zm00001d043806	213.238	-1.73469	0.24616	-7.047	1.82813e-12	1.68686e-11
714	Zm00001d023430	602.844	-1.73394	0.167067	-10.3787	3.09835e-25	6.56723e-24
715	Zm00001d018500	262.586	-1.72927	0.210758	-8.20498	2.30623e-16	2.96856e-15
716	Zm00001d053586	3601.25	-1.72817	0.125603	-13.759	4.49971e-43	1.98373e-41
717	Zm00001d013707	504.999	-1.72775	0.179547	-9.62281	6.40584e-22	1.15254e-20
718	Zm00001d010452	424.378	-1.72616	0.182543	-9.45618	3.19386e-21	5.51392e-20
719	Zm00001d036965	3527.3	-1.72425	0.192753	-8.94538	3.70686e-19	5.67983e-18
720	Zm00001d004220	712.617	-1.72376	0.59789	-2.88306	0.00393827	0.00968866
721	Zm00001d019421	139.585	-1.72353	0.338968	-5.08464	3.68317e-07	1.87314e-06
722	Zm00001d013234	141.704	-1.72224	0.398947	-4.31696	1.58196e-05	6.26138e-05
723	Zm00001d039697	159.151	-1.72211	0.335909	-5.12671	2.9485e-07	1.51933e-06
724	Zm00001d043944	84.1849	-1.72067	0.385636	-4.46191	8.12332e-06	3.38275e-05
725	Zm00001d040365	508.25	-1.72048	0.172366	-9.98157	1.83536e-23	3.59071e-22
726	Zm00001d033258	79.0583	-1.72047	0.379195	-4.53715	5.70185e-06	2.43347e-05
727	Zm00001d046112	104.251	-1.71894	0.341146	-5.03874	4.68603e-07	2.33847e-06
728	Zm00001d024733	109.959	-1.71821	0.342583	-5.01544	5.29129e-07	2.62602e-06
729	Zm00001d044442	60.9182	-1.71747	0.460902	-3.72632	0.000194293	0.000632342
730	Zm00001d039710	246.048	-1.71743	0.230449	-7.45254	9.15626e-14	9.63602e-13
731	Zm00001d028670	143.332	-1.71713	0.32104	-5.34865	8.86107e-08	4.89408e-07
732	Zm00001d044015	250.383	-1.71696	0.264869	-6.48229	9.03421e-11	7.07471e-10
733	Zm00001d010646	4815.17	-1.71549	0.105054	-16.3295	6.0887e-60	4.33025e-58
734	Zm00001d036224	52.1024	-1.71508	0.474799	-3.61222	0.00030359	0.000949653
735	Zm00001d001820	4794.75	-1.71495	0.125622	-13.6517	1.97353e-42	8.46934e-41
736	Zm00001d007891	176.63	-1.71456	0.26377	-6.50023	8.01961e-11	6.32397e-10
737	Zm00001d038520	91.5547	-1.71246	0.346791	-4.93801	7.89245e-07	3.82381e-06
738	Zm00001d039313	618.665	-1.71207	0.195313	-8.76578	1.85486e-18	2.72931e-17
739	Zm00001d038585	539.781	-1.71183	0.281881	-6.07287	1.25645e-09	8.70052e-09
740	Zm00001d042988	115.458	-1.71059	0.357779	-4.78114	1.74306e-06	8.04018e-06
741	Zm00001d047895	58.495	-1.71032	0.446879	-3.82725	0.000129581	0.000437274
742	Zm00001d031837	2889.54	-1.70706	0.124493	-13.7121	8.59035e-43	3.73614e-41
743	Zm00001d032901	141.506	-1.7061	0.285242	-5.98124	2.21451e-09	1.49369e-08
744	Zm00001d044771	67.4823	-1.70076	0.468864	-3.6274	0.00028629	0.000901021
745	Zm00001d011660	72.4344	-1.69977	0.419309	-4.05375	5.04039e-05	0.000183004
746	Zm00001d005885	293.152	-1.69874	0.241533	-7.03317	2.01893e-12	1.8546e-11
747	Zm00001d052471	102.433	-1.69835	0.350037	-4.85192	1.22271e-06	5.77664e-06
748	Zm00001d029371	167.485	-1.69807	0.271253	-6.26012	3.84673e-10	2.81364e-09
749	Zm00001d031985	119.027	-1.69541	0.362084	-4.68238	2.83564e-06	1.26816e-05
750	Zm00001d042192	125.459	-1.69358	0.348927	-4.85368	1.21193e-06	5.73529e-06
751	Zm00001d044181	109.593	-1.69311	0.419807	-4.03306	5.50543e-05	0.000198614
752	Zm00001d013945	873.124	-1.69266	0.155092	-10.9139	9.89461e-28	2.38822e-26
753	Zm00001d050095	437.301	-1.69136	0.179609	-9.41692	4.6451e-21	7.92857e-20
754	Zm00001d021059	105.688	-1.68859	0.366094	-4.61246	3.97941e-06	1.7428e-05
755	Zm00001d043418	15410.1	-1.68666	0.0996695	-16.9226	3.06838e-64	2.46079e-62
756	Zm00001d002069	2965.96	-1.68636	0.140046	-12.0415	2.1508e-33	6.79364e-32
757	Zm00001d032016	501.861	-1.68494	0.18075	-9.32191	1.14265e-20	1.90858e-19
758	Zm00001d031167	250.794	-1.68282	0.232669	-7.23265	4.73657e-13	4.65547e-12
759	Zm00001d024016	1380.05	-1.68244	0.165899	-10.1414	3.61958e-24	7.30246e-23
760	Zm00001d032225	432.046	-1.68126	0.176168	-9.5435	1.38096e-21	2.43428e-20
761	Zm00001d005429	527.286	-1.6808	0.254222	-6.61155	3.80323e-11	3.10519e-10
762	Zm00001d007091	305.863	-1.68047	0.236703	-7.09948	1.25228e-12	1.17712e-11
763	Zm00001d054054	1140.25	-1.67861	0.152274	-11.0236	2.94058e-28	7.27616e-27
764	Zm00001d013035	1131.85	-1.67839	0.141862	-11.8312	2.694e-32	8.09131e-31
765	Zm00001d037684	378.76	-1.67807	0.186752	-8.98555	2.57454e-19	3.97717e-18
766	Zm00001d009549	576.896	-1.67724	0.249975	-6.70963	1.95121e-11	1.63379e-10
767	Zm00001d023411	255.19	-1.67689	0.243252	-6.89363	5.43857e-12	4.81593e-11
768	Zm00001d033156	76.0415	-1.67617	0.477364	-3.5113	0.000445925	0.00134881
769	Zm00001d018868	423.601	-1.67491	0.236858	-7.07137	1.53409e-12	1.42309e-11
770	Zm00001d015129	384.581	-1.67285	0.218144	-7.66854	1.73971e-14	1.94394e-13
771	Zm00001d039679	136.246	-1.67073	0.286658	-5.82832	5.59896e-09	3.59733e-08
772	Zm00001d027589	4169.9	-1.67022	0.103543	-16.1307	1.55245e-58	1.06073e-56
773	Zm00001d019756	303.682	-1.67009	0.291468	-5.72994	1.00466e-08	6.26103e-08
774	Zm00001d017831	729.146	-1.66936	0.179399	-9.30528	1.33638e-20	2.22069e-19
775	Zm00001d005874	801.101	-1.66932	0.179183	-9.31631	1.20461e-20	2.00468e-19
776	Zm00001d038445	498.579	-1.6657	0.201203	-8.27868	1.24553e-16	1.62638e-15
777	Zm00001d048684	4941	-1.66561	0.113785	-14.6383	1.60102e-48	8.34302e-47
778	Zm00001d044253	2510.46	-1.66467	0.163226	-10.1985	2.01271e-24	4.11196e-23
779	Zm00001d028919	176.317	-1.66439	0.268184	-6.20616	5.42947e-10	3.91003e-09
780	Zm00001d048686	814.5	-1.66401	0.142533	-11.6746	1.71892e-31	4.98398e-30
781	Zm00001d027622	58.1449	-1.66313	0.438571	-3.79215	0.00014935	0.000496356
782	Zm00001d044327	296.672	-1.6602	0.225833	-7.35144	1.96077e-13	1.99841e-12
783	Zm00001d002642	1576.1	-1.65972	0.151497	-10.9555	6.25577e-28	1.52952e-26
784	Zm00001d005949	103.403	-1.65952	0.41863	-3.96417	7.36503e-05	0.000259653
785	Zm00001d031638	242.463	-1.65869	0.372929	-4.44772	8.67869e-06	3.59812e-05
786	Zm00001d041772	377.98	-1.65821	0.189881	-8.73286	2.48311e-18	3.61144e-17
787	Zm00001d051244	593.057	-1.65797	0.257908	-6.4285	1.28865e-10	9.91637e-10
788	Zm00001d025011	1404.49	-1.65749	0.155093	-10.6871	1.16982e-26	2.69416e-25
789	Zm00001d007027	608.256	-1.65745	0.246883	-6.71353	1.89968e-11	1.59477e-10
790	Zm00001d043912	470.596	-1.65709	0.188992	-8.76802	1.81835e-18	2.67908e-17
791	Zm00001d014469	45.7137	-1.65053	0.482535	-3.42054	0.000624973	0.00183302
792	Zm00001d006262	181.312	-1.64869	0.265678	-6.20558	5.44953e-10	3.92255e-09
793	Zm00001d008499	138.056	-1.64625	0.339071	-4.85519	1.20272e-06	5.693e-06
794	Zm00001d023387	32.1526	-1.64595	0.589193	-2.79356	0.00521314	0.0124394
795	Zm00001d048837	130.043	-1.6434	0.330774	-4.96833	6.75309e-07	3.30723e-06
796	Zm00001d013065	3319.9	-1.64192	0.109829	-14.9499	1.56063e-50	8.62965e-49
797	Zm00001d023604	1017.75	-1.64128	0.16396	-10.0103	1.37346e-23	2.69638e-22
798	Zm00001d011832	209.147	-1.64101	0.258707	-6.34313	2.25146e-10	1.69504e-09
799	Zm00001d023494	4110.96	-1.6407	0.149936	-10.9427	7.204e-28	1.75566e-26
800	Zm00001d007793	89.1566	-1.63933	0.402302	-4.07487	4.60408e-05	0.000168461
801	Zm00001d049686	78.237	-1.63769	0.392316	-4.17442	2.98741e-05	0.00011338
802	Zm00001d026113	217.743	-1.63744	0.254967	-6.42217	1.34345e-10	1.0317e-09
803	Zm00001d013037	516.98	-1.63634	0.184969	-8.8466	9.02234e-19	1.35401e-17
804	Zm00001d021448	3423.34	-1.63604	0.114084	-14.3407	1.21843e-46	5.90063e-45
805	Zm00001d022120	57.8875	-1.63368	0.451133	-3.62129	0.000293134	0.000919743
806	Zm00001d013489	919.067	-1.63291	0.179432	-9.10046	8.99496e-20	1.4206e-18
807	Zm00001d017885	170.678	-1.63015	0.293077	-5.56221	2.66374e-08	1.56924e-07
808	Zm00001d023381	362.432	-1.62986	0.217522	-7.49285	6.73929e-14	7.16914e-13
809	Zm00001d047345	99.9833	-1.62877	0.42397	-3.84172	0.000122176	0.000414326
810	Zm00001d045895	75.6637	-1.6275	0.404673	-4.02177	5.77622e-05	0.000207456
811	Zm00001d018227	544.054	-1.62642	0.191098	-8.51095	1.72513e-17	2.37321e-16
812	Zm00001d017642	117.098	-1.62574	0.301894	-5.38513	7.2393e-08	4.05258e-07
813	Zm00001d022240	2825.34	-1.62537	0.122999	-13.2145	7.23356e-40	2.87007e-38
814	Zm00001d011021	69.1139	-1.6235	0.420568	-3.86026	0.000113267	0.000386109
815	Zm00001d042989	107.433	-1.62264	0.371153	-4.37188	1.23182e-05	4.97834e-05
816	Zm00001d040310	192.084	-1.62255	0.267296	-6.07022	1.27738e-09	8.8367e-09
817	Zm00001d009589	235.349	-1.62225	0.23202	-6.99185	2.71279e-12	2.46495e-11
818	Zm00001d013126	2675.54	-1.62218	0.121929	-13.3043	2.18413e-40	8.82076e-39
819	Zm00001d024522	887.46	-1.62215	0.250144	-6.48487	8.88062e-11	6.96408e-10
820	Zm00001d029507	2740.49	-1.61845	0.512086	-3.16049	0.00157502	0.00423301
821	Zm00001d003435	1638.05	-1.61813	0.140884	-11.4856	1.55921e-30	4.34276e-29
822	Zm00001d024017	243.877	-1.61782	0.274145	-5.90134	3.60568e-09	2.37743e-08
823	Zm00001d018895	148.64	-1.6168	0.355469	-4.54836	5.40648e-06	2.31577e-05
824	Zm00001d009474	85.3287	-1.61632	0.443816	-3.64187	0.00027066	0.00085659
825	Zm00001d003669	637.636	-1.61595	0.178212	-9.06755	1.21721e-19	1.91037e-18
826	Zm00001d051419	7018.93	-1.61549	0.119847	-13.4796	2.06223e-41	8.60505e-40
827	Zm00001d012418	161.96	-1.61517	0.310265	-5.20579	1.93174e-07	1.02123e-06
828	Zm00001d014623	153.001	-1.61421	0.32915	-4.90417	9.38234e-07	4.5032e-06
829	Zm00001d042064	2904.77	-1.61409	0.119264	-13.5338	9.87916e-42	4.13754e-40
830	Zm00001d007709	130.752	-1.6122	0.299432	-5.3842	7.27683e-08	4.07056e-07
831	Zm00001d000143	2916.73	-1.61099	0.124878	-12.9006	4.46744e-38	1.68113e-36
832	Zm00001d008219	59.0653	-1.60921	0.538338	-2.98922	0.0027969	0.00713372
833	Zm00001d034190	128.328	-1.60834	0.348628	-4.61332	3.9628e-06	1.73586e-05
834	Zm00001d039918	1356.02	-1.60786	0.133644	-12.0309	2.44507e-33	7.69091e-32
835	Zm00001d048783	2578.1	-1.60727	0.174744	-9.19787	3.6513e-20	5.87324e-19
836	Zm00001d043126	1665.5	-1.60715	0.149615	-10.7419	6.46901e-27	1.50209e-25
837	Zm00001d002473	58.5501	-1.60657	0.425783	-3.77323	0.00016115	0.000532131
838	Zm00001d028510	1670.85	-1.6036	0.184706	-8.6819	3.89205e-18	5.58519e-17
839	Zm00001d040426	88.5306	-1.60161	0.41183	-3.889	0.000100657	0.000347179
840	Zm00001d017897	1042.74	-1.60064	0.149691	-10.6929	1.09834e-26	2.53211e-25
841	Zm00001d046783	146.31	-1.60038	0.397021	-4.03099	5.55433e-05	0.000200186
842	Zm00001d052202	52.2972	-1.59827	0.441764	-3.61792	0.000296976	0.000930894
843	Zm00001d048131	70.2714	-1.59702	0.436377	-3.65972	0.000252495	0.000804171
844	Zm00001d044302	274.459	-1.59611	0.22336	-7.14594	8.93842e-13	8.52239e-12
845	Zm00001d014063	216.618	-1.59546	0.277116	-5.75739	8.5424e-09	5.37548e-08
846	Zm00001d044703	78.5031	-1.59385	0.402475	-3.96012	7.49124e-05	0.000263897
847	Zm00001d048804	47.9563	-1.59233	0.468866	-3.39612	0.000683485	0.00198992
848	Zm00001d002695	139.669	-1.592	0.330949	-4.81042	1.50616e-06	7.01613e-06
849	Zm00001d029550	535.047	-1.59167	0.161755	-9.83998	7.57273e-23	1.42721e-21
850	Zm00001d012464	152.583	-1.59123	0.2836	-5.61084	2.01343e-08	1.20337e-07
851	Zm00001d006417	164.803	-1.58934	0.303329	-5.23967	1.60867e-07	8.61104e-07
852	Zm00001d041792	147.935	-1.58697	0.307681	-5.15786	2.49792e-07	1.29869e-06
853	Zm00001d023580	845.984	-1.58587	0.159179	-9.96284	2.21644e-23	4.31758e-22
854	Zm00001d023402	296.481	-1.58562	0.239226	-6.62814	3.39954e-11	2.78767e-10
855	Zm00001d002143	124.632	-1.58548	0.339177	-4.67449	2.94683e-06	1.31425e-05
856	Zm00001d053409	73.6846	-1.58444	0.40662	-3.89661	9.75498e-05	0.000337108
857	Zm00001d035767	108.361	-1.584	0.426634	-3.71279	0.000204987	0.000664469
858	Zm00001d015133	452.639	-1.58393	0.261988	-6.0458	1.48669e-09	1.01851e-08
859	Zm00001d011461	55.8488	-1.58128	0.50193	-3.15039	0.00163052	0.00436348
860	Zm00001d041793	687.799	-1.57979	0.175457	-9.00391	2.17818e-19	3.37872e-18
861	Zm00001d042447	204.207	-1.57531	0.363578	-4.3328	1.47226e-05	5.85644e-05
862	Zm00001d022164	703.429	-1.57526	0.196261	-8.02635	1.00415e-15	1.24097e-14
863	Zm00001d039769	1143.6	-1.57446	0.183829	-8.56485	1.08216e-17	1.51356e-16
864	Zm00001d043257	372.652	-1.57269	0.329773	-4.76902	1.85128e-06	8.50296e-06
865	Zm00001d010514	166.791	-1.57217	0.290938	-5.4038	6.52426e-08	3.67321e-07
866	Zm00001d022461	173.739	-1.57108	0.354658	-4.42984	9.43023e-06	3.88973e-05
867	Zm00001d016301	342.088	-1.57078	0.255508	-6.14769	7.86189e-10	5.55986e-09
868	Zm00001d018178	415.096	-1.5704	0.195695	-8.0247	1.01771e-15	1.25636e-14
869	Zm00001d029102	3024.3	-1.57033	0.110852	-14.166	1.4879e-45	6.98139e-44
870	Zm00001d014325	378.499	-1.56783	0.232584	-6.74094	1.57361e-11	1.32993e-10
871	Zm00001d049292	60.2478	-1.56767	0.473614	-3.31001	0.000932915	0.00263867
872	Zm00001d021774	70.4322	-1.56684	0.382868	-4.09237	4.26995e-05	0.000157381
873	Zm00001d002693	80.1478	-1.56577	0.443054	-3.53404	0.000409261	0.00124692
874	Zm00001d008106	36.6837	-1.56558	0.673913	-2.32312	0.0201725	0.0408544
875	Zm00001d026405	1051.97	-1.56459	0.133067	-11.7579	6.43146e-32	1.90634e-30
876	Zm00001d028968	555.101	-1.56374	0.242897	-6.43788	1.21153e-10	9.33877e-10
877	Zm00001d009755	30.6295	-1.56281	0.583898	-2.6765	0.00743949	0.0170493
878	Zm00001d008527	360.475	-1.56175	0.248272	-6.29047	3.16508e-10	2.33926e-09
879	Zm00001d017461	35.4137	-1.56074	0.542248	-2.87828	0.00399853	0.00981557
880	Zm00001d028554	3540.13	-1.56067	0.520409	-2.99892	0.00270938	0.00692689
881	Zm00001d012080	199.367	-1.55894	0.292243	-5.33441	9.58577e-08	5.26449e-07
882	Zm00001d012131	1362.15	-1.55746	0.145119	-10.7324	7.17427e-27	1.66243e-25
883	Zm00001d034263	430.255	-1.55635	0.219243	-7.09872	1.25914e-12	1.18258e-11
884	Zm00001d047976	537.056	-1.55634	0.18867	-8.24898	1.5975e-16	2.07281e-15
885	Zm00001d006461	5663.75	-1.55602	0.0996046	-15.622	5.15657e-55	3.24849e-53
886	Zm00001d030372	46.1439	-1.55502	0.478841	-3.24747	0.00116436	0.00322354
887	Zm00001d037915	89.3823	-1.55236	0.352694	-4.40144	1.07533e-05	4.39142e-05
888	Zm00001d050851	1579.65	-1.55143	0.146828	-10.5663	4.27236e-26	9.52896e-25
889	Zm00001d042980	865.083	-1.55055	0.166656	-9.30388	1.35411e-20	2.2485e-19
890	Zm00001d008752	913.027	-1.55008	0.152243	-10.1817	2.39447e-24	4.86991e-23
891	Zm00001d016277	1113.63	-1.54971	0.156295	-9.91534	3.57035e-23	6.87794e-22
892	Zm00001d011500	3753.39	-1.54612	0.125722	-12.2979	9.29663e-35	3.07387e-33
893	Zm00001d034461	45.1123	-1.54576	0.505733	-3.05648	0.00223956	0.00582785
894	Zm00001d050272	150.976	-1.54427	0.278795	-5.53908	3.04058e-08	1.77689e-07
895	Zm00001d003039	155.273	-1.54377	0.278302	-5.54712	2.90416e-08	1.70289e-07
896	Zm00001d020763	793.075	-1.5437	0.159006	-9.70847	2.77457e-22	5.1016e-21
897	Zm00001d021596	2919.48	-1.54023	0.183302	-8.40273	4.36223e-17	5.8829e-16
898	Zm00001d043539	1335.46	-1.53991	0.139609	-11.0301	2.73423e-28	6.77297e-27
899	Zm00001d048073	508.443	-1.53924	0.187383	-8.21442	2.13192e-16	2.75046e-15
900	Zm00001d044239	59.2767	-1.5354	0.489533	-3.13647	0.00170997	0.0045551
901	Zm00001d002650	43430.9	-1.53501	0.0916896	-16.7413	6.5498e-63	5.05564e-61
902	Zm00001d044921	737.982	-1.53443	0.209687	-7.31773	2.52206e-13	2.54752e-12
903	Zm00001d051746	1029.8	-1.53358	0.149714	-10.2434	1.26723e-24	2.61256e-23
904	Zm00001d033670	2016.78	-1.53309	0.12588	-12.179	4.02068e-34	1.30461e-32
905	Zm00001d049926	30.141	-1.53306	0.587247	-2.61059	0.00903873	0.0201896
906	Zm00001d014486	2809.03	-1.52931	0.130182	-11.7474	7.28061e-32	2.14678e-30
907	Zm00001d029185	106.873	-1.52919	0.32909	-4.64671	3.37273e-06	1.49564e-05
908	Zm00001d051553	1271.16	-1.52866	0.139534	-10.9555	6.2543e-28	1.52952e-26
909	Zm00001d015723	268.568	-1.52823	0.233616	-6.54163	6.08532e-11	4.86138e-10
910	Zm00001d012883	389.008	-1.52488	0.256125	-5.95364	2.62241e-09	1.75729e-08
911	Zm00001d029809	46.7991	-1.52445	0.565299	-2.69671	0.00700289	0.0161708
912	Zm00001d046696	76.1569	-1.52416	0.509841	-2.98947	0.00279462	0.0071287
913	Zm00001d027355	122.231	-1.52128	0.393427	-3.86673	0.000110304	0.00037706
914	Zm00001d050690	66.5745	-1.52095	0.398217	-3.81939	0.000133784	0.000449778
915	Zm00001d044405	6194.65	-1.52033	0.117795	-12.9066	4.13079e-38	1.56224e-36
916	Zm00001d013012	2633.4	-1.52005	0.155892	-9.75066	1.83266e-22	3.39733e-21
917	Zm00001d028047	613.711	-1.5186	0.183861	-8.2595	1.46289e-16	1.90361e-15
918	Zm00001d001864	3812.83	-1.51654	0.140075	-10.8266	2.57482e-27	6.104e-26
919	Zm00001d048138	5187.47	-1.51379	0.103281	-14.6569	1.21694e-48	6.3562e-47
920	Zm00001d052124	33.829	-1.5135	0.565782	-2.67506	0.00747167	0.0171135
921	Zm00001d008887	26.2345	-1.51301	0.61186	-2.47281	0.0134055	0.0285157
922	Zm00001d016588	473.298	-1.51293	0.290893	-5.201	1.98224e-07	1.04622e-06
923	Zm00001d020852	195.212	-1.51242	0.382455	-3.9545	7.66964e-05	0.000269552
924	Zm00001d049872	1128.56	-1.51212	0.15888	-9.51737	1.77625e-21	3.11408e-20
925	Zm00001d022519	82.9557	-1.50962	0.347999	-4.33798	1.43795e-05	5.73242e-05
926	Zm00001d001774	232.348	-1.50888	0.34097	-4.42528	9.63186e-06	3.96783e-05
927	Zm00001d047234	8462.83	-1.50841	0.123707	-12.1935	3.36798e-34	1.0944e-32
928	Zm00001d023695	1436.37	-1.50736	0.15981	-9.4322	4.01589e-21	6.90671e-20
929	Zm00001d001492	99.6628	-1.50644	0.347962	-4.32933	1.49561e-05	5.94667e-05
930	Zm00001d036234	257.055	-1.50544	0.240129	-6.2693	3.62667e-10	2.66215e-09
931	Zm00001d047369	213.223	-1.50403	0.233619	-6.43796	1.21087e-10	9.33687e-10
932	Zm00001d010753	116.796	-1.50237	0.359341	-4.1809	2.90363e-05	0.000110367
933	Zm00001d039132	79.6824	-1.50169	0.405106	-3.70692	0.000209798	0.000678022
934	Zm00001d015605	1620.47	-1.50095	0.131416	-11.4213	3.2721e-30	8.95905e-29
935	Zm00001d050198	1974.39	-1.50022	0.147132	-10.1964	2.05656e-24	4.19397e-23
936	Zm00001d042636	56.408	-1.49827	0.460441	-3.25399	0.00113797	0.00315784
937	Zm00001d008001	28687.8	-1.49773	0.163109	-9.1824	4.21601e-20	6.76236e-19
938	Zm00001d032324	172.185	-1.49658	0.336159	-4.45199	8.5078e-06	3.5305e-05
939	Zm00001d003471	55.3388	-1.49608	0.439138	-3.40684	0.000657194	0.00191955
940	Zm00001d028992	793.475	-1.49379	0.195406	-7.64455	2.09684e-14	2.32576e-13
941	Zm00001d006861	2337.83	-1.49265	0.169135	-8.82518	1.09285e-18	1.63033e-17
942	Zm00001d006353	81.4629	-1.4915	0.402969	-3.70129	0.000214509	0.000692059
943	Zm00001d022308	2542.33	-1.49025	0.125914	-11.8354	2.56095e-32	7.70192e-31
944	Zm00001d008296	138.676	-1.49022	0.333395	-4.46985	7.82734e-06	3.2643e-05
945	Zm00001d034388	706.713	-1.48983	0.21475	-6.93752	3.9904e-12	3.56989e-11
946	Zm00001d052840	11679.7	-1.48937	0.104091	-14.3084	1.93882e-46	9.28991e-45
947	Zm00001d028471	111.011	-1.48909	0.36771	-4.04962	5.13e-05	0.000186109
948	Zm00001d041670	49.4147	-1.48781	0.472522	-3.14866	0.00164021	0.0043863
949	Zm00001d048315	3460.48	-1.48684	0.118038	-12.5962	2.21472e-36	7.83852e-35
950	Zm00001d051163	222.001	-1.48639	0.284455	-5.22539	1.73785e-07	9.2631e-07
951	Zm00001d018034	2040.22	-1.48395	0.119918	-12.3746	3.58455e-35	1.20279e-33
952	Zm00001d014730	254.291	-1.48196	0.217803	-6.80411	1.01679e-11	8.7636e-11
953	Zm00001d032828	135.629	-1.48191	0.347589	-4.26339	2.01351e-05	7.84455e-05
954	Zm00001d029154	154.978	-1.48172	0.275155	-5.38505	7.2426e-08	4.05342e-07
955	Zm00001d039022	132.908	-1.48076	0.366734	-4.03769	5.39806e-05	0.000195113
956	Zm00001d051552	1654.02	-1.48055	0.153229	-9.66234	4.35797e-22	7.9101e-21
957	Zm00001d038651	851.539	-1.4805	0.173403	-8.53794	1.36639e-17	1.89818e-16
958	Zm00001d020607	179.841	-1.47986	0.283713	-5.21605	1.82775e-07	9.71477e-07
959	Zm00001d040185	1052.34	-1.47936	0.152401	-9.70698	2.81568e-22	5.17299e-21
960	Zm00001d040125	411.378	-1.47786	0.231853	-6.37411	1.84029e-10	1.39477e-09
961	Zm00001d009667	194.154	-1.47485	0.338429	-4.35792	1.31303e-05	5.27733e-05
962	Zm00001d029129	1127.24	-1.47471	0.15595	-9.45625	3.19182e-21	5.51392e-20
963	Zm00001d032768	63.7638	-1.47434	0.47836	-3.08207	0.00205568	0.00539028
964	Zm00001d029777	4229.57	-1.47381	0.171688	-8.58424	9.14369e-18	1.28364e-16
965	Zm00001d042347	13560.7	-1.4735	0.121012	-12.1764	4.15012e-34	1.34469e-32
966	Zm00001d041326	293.982	-1.47322	0.206434	-7.13652	9.57202e-13	9.11114e-12
967	Zm00001d034711	1410.68	-1.47314	0.172976	-8.51643	1.64541e-17	2.26767e-16
968	Zm00001d004798	253.788	-1.47138	0.2464	-5.97151	2.35065e-09	1.58174e-08
969	Zm00001d026786	1787.05	-1.47069	0.188178	-7.81543	5.47755e-15	6.33659e-14
970	Zm00001d031539	754.448	-1.46978	0.173188	-8.4866	2.12762e-17	2.91273e-16
971	Zm00001d038325	1399.78	-1.46842	0.131635	-11.1552	6.75372e-29	1.71428e-27
972	Zm00001d033957	1757.54	-1.46787	0.39012	-3.76262	0.000168145	0.000553694
973	Zm00001d024005	55.8167	-1.46768	0.434928	-3.37453	0.000739424	0.00213874
974	Zm00001d043741	76.1535	-1.46354	0.4102	-3.56788	0.000359877	0.00110946
975	Zm00001d005764	126.896	-1.46313	0.323146	-4.52776	5.96131e-06	2.53566e-05
976	Zm00001d025899	236.733	-1.46297	0.261579	-5.59283	2.23402e-08	1.32889e-07
977	Zm00001d052713	55.4787	-1.46284	0.444634	-3.28999	0.00100192	0.00281379
978	Zm00001d004753	292.869	-1.46102	0.226384	-6.4537	1.09148e-10	8.48572e-10
979	Zm00001d042800	63.021	-1.46062	0.408029	-3.57969	0.000343997	0.00106456
980	Zm00001d026603	2735.68	-1.46047	0.12333	-11.8419	2.36906e-32	7.13432e-31
981	Zm00001d043924	257.984	-1.46021	0.342388	-4.26477	2.00113e-05	7.80435e-05
982	Zm00001d018936	1067.62	-1.46014	0.130788	-11.1642	6.10495e-29	1.55659e-27
983	Zm00001d038459	1277.71	-1.46001	0.221761	-6.58371	4.58863e-11	3.72359e-10
984	Zm00001d014669	7636.25	-1.45918	0.111258	-13.1153	2.6925e-39	1.04449e-37
985	Zm00001d013257	781.468	-1.45794	0.14554	-10.0175	1.27729e-23	2.50975e-22
986	Zm00001d014947	1341.06	-1.45759	0.151803	-9.60185	7.85235e-22	1.41055e-20
987	Zm00001d012394	335.617	-1.45658	0.203159	-7.16966	7.51816e-13	7.22612e-12
988	Zm00001d043045	129.228	-1.45644	0.350864	-4.15101	3.31013e-05	0.000124425
989	Zm00001d047220	853.893	-1.45612	0.185246	-7.86046	3.8273e-15	4.47561e-14
990	Zm00001d011879	366.212	-1.45568	0.316627	-4.59746	4.27674e-06	1.86184e-05
991	Zm00001d040051	2660.92	-1.4556	0.127719	-11.3969	4.33347e-30	1.16952e-28
992	Zm00001d012308	2659.62	-1.45473	0.12394	-11.7373	8.20713e-32	2.41683e-30
993	Zm00001d040793	250.544	-1.4538	0.25667	-5.66409	1.4781e-08	9.01289e-08
994	Zm00001d012196	3603.78	-1.45312	0.110957	-13.0963	3.45755e-39	1.3344e-37
995	Zm00001d025330	62.2736	-1.45246	0.44484	-3.26514	0.0010941	0.00304432
996	Zm00001d020323	33.0207	-1.45196	0.626031	-2.31931	0.0203783	0.0412305
997	Zm00001d006913	71.6974	-1.45102	0.398533	-3.64091	0.000271675	0.000859087
998	Zm00001d041298	168.124	-1.44817	0.25566	-5.66444	1.47505e-08	8.99672e-08
999	Zm00001d031670	448.165	-1.44781	0.231526	-6.25335	4.01733e-10	2.93084e-09
1000	Zm00001d029490	6211.44	-1.44737	0.0995887	-14.5335	7.43666e-48	3.77949e-46
1001	Zm00001d000135	1153.37	-1.44668	0.138181	-10.4695	1.19299e-25	2.60935e-24
1002	Zm00001d032827	42.253	-1.44584	0.53171	-2.71923	0.0065434	0.0152217
1003	Zm00001d016728	128.33	-1.44584	0.339166	-4.26292	2.0177e-05	7.8595e-05
1004	Zm00001d019422	92.4712	-1.44541	0.417678	-3.46059	0.000538988	0.00160117
1005	Zm00001d015284	47.5892	-1.445	0.553427	-2.611	0.00902769	0.0201689
1006	Zm00001d025043	412.043	-1.44483	0.181425	-7.96378	1.66857e-15	2.02133e-14
1007	Zm00001d019910	67.7445	-1.44311	0.423456	-3.40794	0.000654549	0.00191232
1008	Zm00001d027137	526.645	-1.44177	0.167928	-8.58565	9.0326e-18	1.26962e-16
1009	Zm00001d050475	2352.66	-1.43958	0.11776	-12.2248	2.29232e-34	7.48097e-33
1010	Zm00001d028011	1296.88	-1.43871	0.147826	-9.73249	2.19166e-22	4.04295e-21
1011	Zm00001d045661	46.7523	-1.43772	0.614962	-2.33789	0.0193928	0.0394417
1012	Zm00001d052695	6298.59	-1.4368	0.1203	-11.9434	7.02782e-33	2.17133e-31
1013	Zm00001d018260	709.404	-1.43638	0.153337	-9.36747	7.42925e-21	1.25482e-19
1014	Zm00001d031989	100.546	-1.43635	0.355307	-4.04256	5.287e-05	0.000191313
1015	Zm00001d039267	508.374	-1.43602	0.178536	-8.04333	8.74304e-16	1.08644e-14
1016	Zm00001d022525	1666.34	-1.43461	0.122047	-11.7545	6.69166e-32	1.98087e-30
1017	Zm00001d025503	300.61	-1.43432	0.252541	-5.67957	1.35032e-08	8.29633e-08
1018	Zm00001d038178	48.1513	-1.43381	0.559483	-2.56275	0.0103847	0.0227799
1019	Zm00001d045393	803.794	-1.43364	0.187407	-7.64989	2.01149e-14	2.23547e-13
1020	Zm00001d011152	1417.05	-1.43364	0.175903	-8.15014	3.63499e-16	4.62367e-15
1021	Zm00001d033082	505.057	-1.43303	0.199953	-7.16683	7.67533e-13	7.36467e-12
1022	Zm00001d015504	3924.2	-1.43193	0.114187	-12.5402	4.49891e-36	1.5726e-34
1023	Zm00001d030348	46.9203	-1.43186	0.483026	-2.96436	0.00303312	0.0076739
1024	Zm00001d006016	1059.82	-1.43174	0.573099	-2.49825	0.0124808	0.0267296
1025	Zm00001d013519	477.347	-1.43088	0.198221	-7.21863	5.25155e-13	5.12157e-12
1026	Zm00001d006874	1071.22	-1.43078	0.189537	-7.54884	4.39156e-14	4.74532e-13
1027	Zm00001d030139	108.445	-1.42992	0.35228	-4.05905	4.92736e-05	0.000179332
1028	Zm00001d033402	110.82	-1.42939	0.374565	-3.81614	0.000135558	0.000455034
1029	Zm00001d024160	53.9744	-1.42902	0.502793	-2.84217	0.0044807	0.0108659
1030	Zm00001d047847	5482.96	-1.42761	0.151269	-9.43755	3.81607e-21	6.56805e-20
1031	Zm00001d025519	70.1672	-1.42696	0.42914	-3.32515	0.000883705	0.00251174
1032	Zm00001d034330	319.506	-1.42694	0.299335	-4.76702	1.86969e-06	8.58056e-06
1033	Zm00001d047931	410.336	-1.42669	0.228491	-6.24394	4.26671e-10	3.10376e-09
1034	Zm00001d040540	142.624	-1.4262	0.299676	-4.75914	1.94417e-06	8.8971e-06
1035	Zm00001d009609	492.299	-1.42522	0.167036	-8.53242	1.43316e-17	1.98605e-16
1036	Zm00001d020530	1129.96	-1.42495	0.152935	-9.31735	1.19284e-20	1.98801e-19
1037	Zm00001d042740	39.639	-1.42406	0.494182	-2.88166	0.00395587	0.00972668
1038	Zm00001d031766	1363.78	-1.42398	0.137523	-10.3545	3.99349e-25	8.41723e-24
1039	Zm00001d007788	49.7123	-1.42375	0.552762	-2.5757	0.0100037	0.0220554
1040	Zm00001d013606	76.6812	-1.42311	0.392376	-3.6269	0.000286846	0.000902268
1041	Zm00001d032003	228.443	-1.42305	0.29128	-4.88551	1.0316e-06	4.92728e-06
1042	Zm00001d026131	661.034	-1.41984	0.202537	-7.0103	2.3781e-12	2.17306e-11
1043	Zm00001d008720	1167.68	-1.4193	0.154041	-9.21377	3.14877e-20	5.09753e-19
1044	Zm00001d009587	556.064	-1.41892	0.173647	-8.17128	3.05127e-16	3.90094e-15
1045	Zm00001d013577	44.4362	-1.41837	0.482742	-2.93816	0.00330163	0.00827547
1046	Zm00001d022590	3669.58	-1.41669	0.153558	-9.22578	2.81508e-20	4.56713e-19
1047	Zm00001d005627	2138.47	-1.41569	0.126775	-11.1669	5.91975e-29	1.51107e-27
1048	Zm00001d002266	4763.27	-1.41305	0.121368	-11.6427	2.50121e-31	7.16042e-30
1049	Zm00001d040769	1472.26	-1.41291	0.13496	-10.4691	1.19759e-25	2.61688e-24
1050	Zm00001d026303	473.82	-1.41139	0.198618	-7.10604	1.19421e-12	1.12441e-11
1051	Zm00001d047404	896.763	-1.41115	0.136964	-10.303	6.82696e-25	1.42303e-23
1052	Zm00001d004955	477.655	-1.40729	0.196675	-7.15539	8.34343e-13	7.97528e-12
1053	Zm00001d018290	966.976	-1.40686	0.135915	-10.351	4.14012e-25	8.71004e-24
1054	Zm00001d030399	193.794	-1.40616	0.303802	-4.62854	3.6826e-06	1.62287e-05
1055	Zm00001d027330	121.782	-1.40554	0.294909	-4.76601	1.8791e-06	8.62023e-06
1056	Zm00001d045427	774.642	-1.40523	0.16062	-8.74876	2.15709e-18	3.14741e-17
1057	Zm00001d035168	2185.14	-1.40485	0.13508	-10.4001	2.4759e-25	5.31261e-24
1058	Zm00001d035631	889.304	-1.40157	0.186172	-7.52835	5.13839e-14	5.52066e-13
1059	Zm00001d003469	135.863	-1.40131	0.311988	-4.49154	7.07094e-06	2.97242e-05
1060	Zm00001d017641	1237.24	-1.3997	0.17689	-7.91283	2.51602e-15	2.99171e-14
1061	Zm00001d032295	2594.21	-1.39958	0.348875	-4.01171	6.02816e-05	0.000215887
1062	Zm00001d029654	3876.72	-1.39915	0.1181	-11.8472	2.22485e-32	6.70897e-31
1063	Zm00001d037329	106.141	-1.39662	0.318567	-4.38405	1.16493e-05	4.72998e-05
1064	Zm00001d032808	2582.36	-1.39607	0.131713	-10.5994	3.00057e-26	6.74563e-25
1065	Zm00001d021844	78.9504	-1.39593	0.374451	-3.72794	0.000193053	0.000628574
1066	Zm00001d018973	4135.22	-1.39536	0.17475	-7.98486	1.40683e-15	1.71612e-14
1067	Zm00001d044291	64.1284	-1.39464	0.440212	-3.16811	0.00153434	0.00413349
1068	Zm00001d006563	458.485	-1.39459	0.537082	-2.5966	0.00941528	0.0209212
1069	Zm00001d014882	4518.35	-1.39356	0.120852	-11.5311	9.19729e-31	2.58072e-29
1070	Zm00001d023499	291.238	-1.39235	0.24198	-5.75399	8.71599e-09	5.47862e-08
1071	Zm00001d039991	3096.92	-1.39212	0.130787	-10.6442	1.85601e-26	4.22714e-25
1072	Zm00001d051789	231.675	-1.39109	0.300986	-4.62179	3.80441e-06	1.67199e-05
1073	Zm00001d046831	1533.93	-1.39093	0.145313	-9.57196	1.04894e-21	1.86646e-20
1074	Zm00001d011403	210.762	-1.39036	0.26591	-5.22868	1.70725e-07	9.11069e-07
1075	Zm00001d044566	1261.61	-1.3893	0.196881	-7.05654	1.70695e-12	1.57891e-11
1076	Zm00001d010099	119.327	-1.38896	0.312022	-4.45149	8.52771e-06	3.53811e-05
1077	Zm00001d020544	6529.09	-1.38772	0.109558	-12.6665	9.06628e-37	3.27022e-35
1078	Zm00001d026290	535.78	-1.38699	0.167006	-8.30503	9.97937e-17	1.31293e-15
1079	Zm00001d015434	204.499	-1.3868	0.286443	-4.84145	1.28896e-06	6.06685e-06
1080	Zm00001d035166	152.258	-1.38615	0.286451	-4.83902	1.30478e-06	6.13236e-06
1081	Zm00001d042060	91.7942	-1.3844	0.362776	-3.81612	0.000135569	0.000455034
1082	Zm00001d005748	281.534	-1.3834	0.247577	-5.58775	2.30034e-08	1.36583e-07
1083	Zm00001d012447	1395.8	-1.38313	0.130326	-10.6129	2.59659e-26	5.87245e-25
1084	Zm00001d016727	94.3687	-1.38204	0.346486	-3.98875	6.64228e-05	0.000236049
1085	Zm00001d018403	3836.87	-1.38139	0.124647	-11.0825	1.52584e-28	3.8173e-27
1086	Zm00001d028676	600.628	-1.38124	0.196217	-7.03932	1.9318e-12	1.77673e-11
1087	Zm00001d029151	55.9431	-1.37975	0.497272	-2.77463	0.0055264	0.0131039
1088	Zm00001d042922	4622.17	-1.37902	0.188105	-7.33112	2.28237e-13	2.31679e-12
1089	Zm00001d051525	1168.82	-1.37816	0.144874	-9.51285	1.85505e-21	3.24469e-20
1090	Zm00001d046234	714.241	-1.37785	0.158302	-8.7039	3.20667e-18	4.62809e-17
1091	Zm00001d037778	346.56	-1.37742	0.231311	-5.95482	2.60353e-09	1.74515e-08
1092	Zm00001d042182	313.01	-1.37651	0.21348	-6.44793	1.13389e-10	8.77017e-10
1093	Zm00001d018513	73.2875	-1.37572	0.381321	-3.60777	0.000308835	0.000964592
1094	Zm00001d031543	15156.3	-1.37525	0.105995	-12.9746	1.70387e-38	6.47642e-37
1095	Zm00001d023374	68.7015	-1.37522	0.42301	-3.25103	0.00114988	0.00318862
1096	Zm00001d020685	1564.6	-1.37289	0.132679	-10.3475	4.29719e-25	9.0237e-24
1097	Zm00001d043800	135.732	-1.37099	0.288801	-4.74718	2.06268e-06	9.41086e-06
1098	Zm00001d047395	933.14	-1.36686	0.163264	-8.37206	5.66183e-17	7.59028e-16
1099	Zm00001d046232	74.1871	-1.36652	0.528768	-2.58434	0.00975649	0.0215692
1100	Zm00001d001804	2344.7	-1.3659	0.118377	-11.5385	8.43779e-31	2.3735e-29
1101	Zm00001d016163	79.5977	-1.36554	0.439278	-3.1086	0.00187977	0.00497226
1102	Zm00001d005532	339.717	-1.36221	0.189908	-7.173	7.33707e-13	7.05807e-12
1103	Zm00001d044988	591.395	-1.36062	0.186781	-7.28461	3.22611e-13	3.22269e-12
1104	Zm00001d034529	504.176	-1.3603	0.187959	-7.23719	4.58067e-13	4.51011e-12
1105	Zm00001d010759	393.132	-1.35878	0.208142	-6.52812	6.66002e-11	5.2999e-10
1106	Zm00001d022193	124.494	-1.35834	0.349261	-3.88918	0.000100582	0.000346973
1107	Zm00001d049152	1929.69	-1.35737	0.1571	-8.64018	5.61242e-18	7.98304e-17
1108	Zm00001d011368	53.5342	-1.3568	0.433248	-3.13168	0.00173807	0.00462396
1109	Zm00001d052962	326.337	-1.35548	0.28288	-4.7917	1.65371e-06	7.65459e-06
1110	Zm00001d004419	51.3131	-1.35476	0.472782	-2.8655	0.00416353	0.010183
1111	Zm00001d042445	1627.89	-1.3542	0.158237	-8.55801	1.14829e-17	1.60406e-16
1112	Zm00001d003524	44.2812	-1.35369	0.519746	-2.60453	0.00920016	0.0204956
1113	Zm00001d042259	421.587	-1.35328	0.190955	-7.0869	1.37147e-12	1.28223e-11
1114	Zm00001d016885	672.132	-1.35126	0.168833	-8.00349	1.20939e-15	1.48489e-14
1115	Zm00001d043399	215.498	-1.35099	0.303278	-4.45461	8.40448e-06	3.49083e-05
1116	Zm00001d031199	713.564	-1.35016	0.155026	-8.70921	3.06e-18	4.42204e-17
1117	Zm00001d053202	1268.99	-1.3494	0.171727	-7.85782	3.90884e-15	4.56388e-14
1118	Zm00001d011288	3052.97	-1.34904	0.121202	-11.1305	8.91008e-29	2.24399e-27
1119	Zm00001d017622	175.975	-1.34889	0.272193	-4.95565	7.20882e-07	3.51519e-06
1120	Zm00001d010285	448.998	-1.34755	0.180035	-7.48493	7.15859e-14	7.60088e-13
1121	Zm00001d005811	69.3278	-1.34722	0.382033	-3.52646	0.000421152	0.00128055
1122	Zm00001d045298	335.874	-1.34713	0.205224	-6.56422	5.23055e-11	4.22479e-10
1123	Zm00001d013135	321.011	-1.34671	0.228053	-5.90525	3.52116e-09	2.3251e-08
1124	Zm00001d002378	99.0252	-1.34541	0.340141	-3.95544	7.63948e-05	0.000268617
1125	Zm00001d044802	3648.45	-1.34454	0.11776	-11.4176	3.4144e-30	9.32608e-29
1126	Zm00001d029270	716.095	-1.34116	0.171793	-7.80684	5.86411e-15	6.76646e-14
1127	Zm00001d010199	1157.77	-1.34083	0.138708	-9.66657	4.18154e-22	7.60818e-21
1128	Zm00001d048814	584.204	-1.33967	0.160731	-8.33483	7.76081e-17	1.03125e-15
1129	Zm00001d008716	1255.85	-1.3385	0.183855	-7.28019	3.33362e-13	3.32568e-12
1130	Zm00001d016799	47.2436	-1.3384	0.489113	-2.73638	0.00621195	0.0145374
1131	Zm00001d033483	96.2835	-1.33775	0.376108	-3.55681	0.000375381	0.00115301
1132	Zm00001d005482	311.589	-1.33658	0.212242	-6.29746	3.0257e-10	2.24137e-09
1133	Zm00001d053808	2912.04	-1.33643	0.111041	-12.0355	2.31223e-33	7.29336e-32
1134	Zm00001d002132	918.415	-1.33539	0.506984	-2.63399	0.00843886	0.019072
1135	Zm00001d015335	207.607	-1.33508	0.2642	-5.0533	4.34237e-07	2.17754e-06
1136	Zm00001d041282	44.0673	-1.33506	0.498879	-2.67612	0.00744801	0.0170646
1137	Zm00001d047178	1908.48	-1.33426	0.114249	-11.6786	1.64022e-31	4.76189e-30
1138	ENSRNA049467153	146.582	-1.33424	0.365179	-3.65365	0.000258536	0.000821447
1139	Zm00001d044020	189.995	-1.33399	0.262853	-5.07505	3.87386e-07	1.96042e-06
1140	Zm00001d045384	1379.89	-1.33383	0.128777	-10.3577	3.86203e-25	8.14772e-24
1141	Zm00001d018796	114.236	-1.33256	0.321192	-4.1488	3.34219e-05	0.000125581
1142	Zm00001d020882	259.388	-1.33202	0.3207	-4.15347	3.27467e-05	0.000123269
1143	Zm00001d012848	248.044	-1.3317	0.242472	-5.49216	3.97049e-08	2.28606e-07
1144	Zm00001d024379	2367.89	-1.33042	0.181945	-7.3122	2.62805e-13	2.65102e-12
1145	Zm00001d026104	396.454	-1.33017	0.189535	-7.01805	2.24989e-12	2.05923e-11
1146	Zm00001d018871	87.1181	-1.32917	0.371149	-3.58123	0.000341976	0.0010586
1147	Zm00001d049932	122.272	-1.32875	0.311872	-4.26055	2.03921e-05	7.93372e-05
1148	Zm00001d016933	126.337	-1.32811	0.324073	-4.09819	4.16393e-05	0.000153775
1149	Zm00001d033364	329.354	-1.32623	0.248783	-5.33088	9.77399e-08	5.35616e-07
1150	Zm00001d002052	3672.25	-1.32619	0.124348	-10.6652	1.48056e-26	3.38911e-25
1151	Zm00001d031338	1439.28	-1.32563	0.130095	-10.1897	2.20534e-24	4.49333e-23
1152	Zm00001d003247	118.345	-1.32459	0.325679	-4.06716	4.75888e-05	0.00017362
1153	Zm00001d003545	66.3286	-1.32414	0.495188	-2.67402	0.00749489	0.0171563
1154	Zm00001d003390	370.5	-1.32341	0.215258	-6.14799	7.84723e-10	5.55123e-09
1155	Zm00001d023779	366.517	-1.32338	0.232336	-5.69596	1.22678e-08	7.58055e-08
1156	Zm00001d044662	33.9738	-1.32307	0.551063	-2.40093	0.0163532	0.0339712
1157	Zm00001d049511	78.5428	-1.32229	0.417204	-3.16942	0.00152742	0.00411877
1158	Zm00001d026595	75.1239	-1.3217	0.378536	-3.49161	0.000480113	0.00144295
1159	Zm00001d031981	1567.32	-1.32095	0.117865	-11.2073	3.75307e-29	9.72273e-28
1160	Zm00001d011168	1418.3	-1.31978	0.129365	-10.202	1.94171e-24	3.9741e-23
1161	Zm00001d025445	471.136	-1.31879	0.192816	-6.83962	7.9404e-12	6.92824e-11
1162	Zm00001d051615	638.114	-1.3186	0.219418	-6.00954	1.86054e-09	1.26246e-08
1163	Zm00001d011944	109.199	-1.3184	0.329545	-4.00067	6.31636e-05	0.000225459
1164	Zm00001d022147	351.912	-1.31804	0.220421	-5.97968	2.23572e-09	1.50664e-08
1165	Zm00001d052063	501.304	-1.31723	0.171622	-7.67515	1.65225e-14	1.84803e-13
1166	Zm00001d011941	3033.16	-1.3171	0.113844	-11.5694	5.8921e-31	1.66778e-29
1167	Zm00001d022510	3885.57	-1.31685	0.102518	-12.845	9.17092e-38	3.41696e-36
1168	Zm00001d020538	653.676	-1.31677	0.248035	-5.30881	1.10344e-07	6.00612e-07
1169	Zm00001d036024	2484.21	-1.31595	0.109669	-11.9993	3.58209e-33	1.11434e-31
1170	Zm00001d043421	98.7879	-1.3153	0.418653	-3.14175	0.0016794	0.00448368
1171	Zm00001d016037	1480.48	-1.31409	0.206784	-6.3549	2.08558e-10	1.5733e-09
1172	Zm00001d010705	1700.47	-1.31405	0.137458	-9.55965	1.18155e-21	2.0942e-20
1173	Zm00001d010416	1494.38	-1.31351	0.124337	-10.5642	4.36877e-26	9.73439e-25
1174	Zm00001d023581	72.1903	-1.31296	0.388844	-3.37658	0.00073394	0.00212369
1175	Zm00001d017495	63.2208	-1.31256	0.482664	-2.7194	0.00654001	0.0152154
1176	Zm00001d019240	162.926	-1.31194	0.293605	-4.46837	7.88165e-06	3.28635e-05
1177	Zm00001d020088	6052.75	-1.31083	0.130408	-10.0517	9.02602e-24	1.78282e-22
1178	Zm00001d047699	3214.81	-1.31061	0.139025	-9.42714	4.21404e-21	7.242e-20
1179	Zm00001d011246	168.91	-1.31047	0.293163	-4.4701	7.81843e-06	3.26235e-05
1180	Zm00001d045885	440.839	-1.30948	0.19406	-6.74779	1.50113e-11	1.27057e-10
1181	Zm00001d008405	493.293	-1.30929	0.203025	-6.44888	1.1268e-10	8.72428e-10
1182	Zm00001d017702	642.104	-1.30917	0.15055	-8.6959	3.44093e-18	4.95039e-17
1183	Zm00001d045157	657.039	-1.30859	0.174011	-7.52015	5.47151e-14	5.86185e-13
1184	Zm00001d032721	50.5626	-1.30849	0.45524	-2.87429	0.00404943	0.00993297
1185	Zm00001d002597	965.411	-1.30755	0.197734	-6.61269	3.77395e-11	3.08463e-10
1186	Zm00001d003439	135.483	-1.30674	0.341865	-3.82238	0.000132171	0.000445016
1187	Zm00001d044918	275.664	-1.30597	0.260933	-5.00501	5.5859e-07	2.76388e-06
1188	Zm00001d018625	3534.23	-1.30556	0.143331	-9.10871	8.33703e-20	1.31946e-18
1189	Zm00001d012894	168.208	-1.30525	0.261155	-4.99799	5.79324e-07	2.86007e-06
1190	Zm00001d016818	639.817	-1.30349	0.183326	-7.11023	1.1585e-12	1.0926e-11
1191	Zm00001d007117	2192.57	-1.30272	0.111712	-11.6613	2.00851e-31	5.77918e-30
1192	Zm00001d046468	1263.48	-1.30143	0.171593	-7.58438	3.3409e-14	3.65013e-13
1193	Zm00001d012738	1403.61	-1.30121	0.13121	-9.91702	3.51073e-23	6.76885e-22
1194	Zm00001d018603	292.284	-1.30079	0.233167	-5.57879	2.42197e-08	1.43278e-07
1195	Zm00001d038959	715.918	-1.29988	0.155456	-8.3617	6.18192e-17	8.2728e-16
1196	Zm00001d028398	12007.6	-1.29979	0.0897474	-14.4828	1.55711e-47	7.79104e-46
1197	Zm00001d052530	47.0034	-1.29975	0.56668	-2.29363	0.021812	0.0437555
1198	Zm00001d035400	65.0989	-1.29789	0.498247	-2.60492	0.00918961	0.0204761
1199	Zm00001d039230	68.1899	-1.29763	0.44845	-2.89359	0.00380863	0.00940555
1200	Zm00001d050557	70.2775	-1.2974	0.413556	-3.13718	0.00170581	0.00454562
1201	Zm00001d017204	5996.36	-1.29527	0.119147	-10.8712	1.58114e-27	3.78402e-26
1202	Zm00001d025816	3076.35	-1.29469	0.128758	-10.0553	8.70684e-24	1.72352e-22
1203	Zm00001d031129	96.0646	-1.29422	0.348302	-3.7158	0.000202561	0.000657264
1204	Zm00001d039045	117.441	-1.29189	0.364737	-3.54198	0.000397141	0.00121342
1205	Zm00001d026551	319.341	-1.29182	0.207027	-6.23987	4.37941e-10	3.18165e-09
1206	Zm00001d034706	68.3278	-1.29142	0.493423	-2.61727	0.00886353	0.019861
1207	Zm00001d047187	3548.69	-1.29127	0.147589	-8.74906	2.15128e-18	3.14096e-17
1208	Zm00001d006230	496.823	-1.29076	0.212874	-6.0635	1.33193e-09	9.1726e-09
1209	Zm00001d048327	117.386	-1.29013	0.349918	-3.68694	0.000226969	0.000729657
1210	Zm00001d026446	264	-1.28978	0.223766	-5.76398	8.21523e-09	5.1797e-08
1211	Zm00001d026026	1029.77	-1.28947	0.23525	-5.48126	4.22304e-08	2.42407e-07
1212	Zm00001d012224	8150.99	-1.28941	0.142421	-9.0535	1.38457e-19	2.16702e-18
1213	Zm00001d036709	626.681	-1.28838	0.169369	-7.60693	2.80687e-14	3.08906e-13
1214	Zm00001d043599	1377.02	-1.28678	0.143783	-8.94942	3.57354e-19	5.48299e-18
1215	Zm00001d026629	572.663	-1.28566	0.181552	-7.08152	1.42577e-12	1.32861e-11
1216	Zm00001d045670	700.929	-1.28523	0.176614	-7.27709	3.41105e-13	3.39993e-12
1217	Zm00001d030561	712.42	-1.28482	0.17322	-7.41726	1.19567e-13	1.241e-12
1218	Zm00001d017611	522.536	-1.28191	0.196608	-6.52013	7.02477e-11	5.58034e-10
1219	Zm00001d044976	129.959	-1.28038	0.29987	-4.26978	1.95664e-05	7.64273e-05
1220	Zm00001d031995	1535.19	-1.28015	0.157976	-8.10342	5.34346e-16	6.74374e-15
1221	Zm00001d043232	36.4697	-1.27834	0.571654	-2.23621	0.025338	0.0497693
1222	Zm00001d040148	3441.42	-1.27827	0.13907	-9.19158	3.87115e-20	6.21804e-19
1223	Zm00001d026331	5504.69	-1.27822	0.125308	-10.2006	1.96975e-24	4.02783e-23
1224	Zm00001d038065	39.8969	-1.27762	0.510587	-2.50227	0.0123401	0.0264622
1225	Zm00001d024058	353.419	-1.27754	0.199114	-6.41609	1.39815e-10	1.07188e-09
1226	ENSRNA049478230	300.798	-1.27726	0.352737	-3.621	0.000293465	0.000920654
1227	Zm00001d025704	118.272	-1.27493	0.386233	-3.30094	0.000963601	0.00271629
1228	Zm00001d020937	112.717	-1.27346	0.327657	-3.88657	0.000101669	0.000350242
1229	Zm00001d046385	715.722	-1.272	0.225194	-5.64846	1.61896e-08	9.81093e-08
1230	Zm00001d038358	644.85	-1.27187	0.186317	-6.82636	8.70974e-12	7.57614e-11
1231	Zm00001d021025	178.208	-1.27136	0.324794	-3.91435	9.06499e-05	0.00031497
1232	Zm00001d011223	2101.8	-1.27072	0.125552	-10.1211	4.45561e-24	8.93333e-23
1233	Zm00001d036463	70.136	-1.26874	0.401041	-3.1636	0.00155828	0.00419349
1234	Zm00001d052480	49.0456	-1.2681	0.559891	-2.26491	0.0235179	0.0466388
1235	Zm00001d015227	234.462	-1.26771	0.383678	-3.3041	0.00095282	0.00268925
1236	Zm00001d039326	44.2595	-1.26713	0.480906	-2.63488	0.00841679	0.0190278
1237	Zm00001d040795	859.309	-1.26695	0.186473	-6.79426	1.08873e-11	9.34801e-11
1238	Zm00001d009426	993.152	-1.26644	0.133543	-9.48341	2.46111e-21	4.275e-20
1239	Zm00001d022227	631.785	-1.26638	0.194634	-6.50646	7.69421e-11	6.08647e-10
1240	Zm00001d039303	114.464	-1.26628	0.323249	-3.91735	8.95267e-05	0.000311329
1241	Zm00001d038874	240.06	-1.26575	0.255869	-4.94687	7.54164e-07	3.6672e-06
1242	zma-MIR160b	31.7444	-1.26569	0.562156	-2.2515	0.024354	0.0480619
1243	Zm00001d022451	2356.34	-1.2656	0.560519	-2.2579	0.0239519	0.047376
1244	Zm00001d048311	41.6117	-1.26409	0.516609	-2.4469	0.014409	0.0303562
1245	Zm00001d020862	532.83	-1.26354	0.231162	-5.46601	4.60287e-08	2.62941e-07
1246	Zm00001d022557	157.707	-1.26261	0.39919	-3.16294	0.00156186	0.00420111
1247	Zm00001d035401	108.846	-1.26236	0.375684	-3.36017	0.000778952	0.00224075
1248	Zm00001d027993	113.519	-1.26224	0.380896	-3.31387	0.000920142	0.00260515
1249	Zm00001d026677	1102.24	-1.26221	0.150647	-8.37859	5.35653e-17	7.18951e-16
1250	Zm00001d017643	143.804	-1.26213	0.303477	-4.15891	3.19774e-05	0.000120594
1251	Zm00001d012301	568.101	-1.26142	0.192231	-6.56197	5.31007e-11	4.28443e-10
1252	Zm00001d013162	2260.23	-1.26104	0.134575	-9.37057	7.21414e-21	1.21939e-19
1253	Zm00001d023681	195.721	-1.2609	0.266078	-4.73884	2.14943e-06	9.78492e-06
1254	Zm00001d012307	5183.71	-1.26075	0.112521	-11.2046	3.87237e-29	9.98603e-28
1255	Zm00001d044667	14526.7	-1.26074	0.107602	-11.7167	1.04631e-31	3.06917e-30
1256	Zm00001d031878	529.128	-1.25804	0.247301	-5.08708	3.63613e-07	1.85047e-06
1257	Zm00001d020279	166.272	-1.25764	0.266082	-4.72651	2.28413e-06	1.03606e-05
1258	Zm00001d026636	168.476	-1.25683	0.315086	-3.98886	6.63904e-05	0.000235971
1259	Zm00001d042210	360.637	-1.25589	0.196049	-6.406	1.4939e-10	1.14296e-09
1260	Zm00001d044246	53936.5	-1.25553	0.124646	-10.0728	7.28807e-24	1.44839e-22
1261	Zm00001d036055	2377.43	-1.25488	0.138757	-9.04375	1.51391e-19	2.36618e-18
1262	Zm00001d010066	2065.14	-1.25282	0.139517	-8.97972	2.7146e-19	4.18782e-18
1263	Zm00001d030264	423.208	-1.2525	0.235529	-5.31783	1.05013e-07	5.72696e-07
1264	Zm00001d012292	111.815	-1.25226	0.35219	-3.55563	0.000377077	0.00115775
1265	Zm00001d028987	231.426	-1.25124	0.224983	-5.5615	2.67459e-08	1.5744e-07
1266	Zm00001d046363	1363.65	-1.2506	0.132722	-9.42268	4.39729e-21	7.53973e-20
1267	Zm00001d041861	450.846	-1.25055	0.192197	-6.50659	7.68741e-11	6.08322e-10
1268	Zm00001d029211	175.881	-1.24785	0.274392	-4.54771	5.42335e-06	2.32256e-05
1269	Zm00001d010814	666.163	-1.24782	0.213408	-5.84711	5.00189e-09	3.23301e-08
1270	Zm00001d035589	523.589	-1.24735	0.17426	-7.15797	8.18834e-13	7.83033e-12
1271	Zm00001d031833	10880.1	-1.24716	0.135167	-9.22678	2.7888e-20	4.52775e-19
1272	Zm00001d048092	2489.15	-1.24542	0.112012	-11.1186	1.01821e-28	2.55866e-27
1273	Zm00001d044677	513.913	-1.24535	0.182082	-6.8395	7.94674e-12	6.9311e-11
1274	Zm00001d032547	3295.68	-1.24348	0.131503	-9.45591	3.20233e-21	5.52432e-20
1275	Zm00001d011367	48.7569	-1.24338	0.445763	-2.78932	0.00528185	0.0125887
1276	Zm00001d039112	94.0204	-1.243	0.377096	-3.29624	0.000979871	0.00275837
1277	Zm00001d037552	32.3976	-1.24294	0.553704	-2.24478	0.0247826	0.0488097
1278	Zm00001d026663	157.499	-1.24213	0.285432	-4.35175	1.35055e-05	5.40794e-05
1279	Zm00001d042997	1301.06	-1.242	0.134509	-9.23358	2.61742e-20	4.25868e-19
1280	Zm00001d043202	73.0763	-1.24137	0.470121	-2.64053	0.00827768	0.0187621
1281	Zm00001d011819	522.218	-1.24053	0.19726	-6.28879	3.19948e-10	2.36392e-09
1282	Zm00001d003277	1429.69	-1.23928	0.131885	-9.39666	5.63236e-21	9.58477e-20
1283	Zm00001d030969	919.98	-1.23886	0.147859	-8.37862	5.35514e-17	7.18951e-16
1284	Zm00001d042695	1512.46	-1.2388	0.131197	-9.44231	3.64641e-21	6.28082e-20
1285	Zm00001d031248	415.571	-1.2387	0.188657	-6.56587	5.17313e-11	4.18289e-10
1286	Zm00001d006257	1442.8	-1.23702	0.182723	-6.76993	1.28844e-11	1.09794e-10
1287	Zm00001d040366	376.724	-1.23672	0.193205	-6.40104	1.54318e-10	1.17827e-09
1288	Zm00001d020541	2384.78	-1.23658	0.120022	-10.3029	6.83422e-25	1.42323e-23
1289	Zm00001d002982	75.6644	-1.23603	0.417434	-2.96103	0.00306616	0.00774624
1290	Zm00001d047470	7142.48	-1.23527	0.182191	-6.78005	1.20131e-11	1.02834e-10
1291	Zm00001d042917	675.715	-1.23494	0.231652	-5.33099	9.7681e-08	5.35553e-07
1292	Zm00001d026382	501.821	-1.23493	0.278473	-4.43466	9.22196e-06	3.81268e-05
1293	Zm00001d023183	192.108	-1.2348	0.296038	-4.17107	3.03178e-05	0.00011491
1294	Zm00001d043787	760.621	-1.23268	0.14927	-8.25803	1.48092e-16	1.92597e-15
1295	Zm00001d052640	361.852	-1.23263	0.276671	-4.45521	8.38122e-06	3.48245e-05
1296	Zm00001d032311	990.758	-1.23193	0.137821	-8.93862	3.94078e-19	6.03008e-18
1297	Zm00001d006567	4477.34	-1.23068	0.116507	-10.5632	4.41557e-26	9.81932e-25
1298	Zm00001d033981	1001.57	-1.22984	0.136968	-8.97902	2.73187e-19	4.21159e-18
1299	Zm00001d048859	338.753	-1.22927	0.243484	-5.04868	4.44874e-07	2.22792e-06
1300	Zm00001d005544	451.662	-1.22805	0.231933	-5.29484	1.19122e-07	6.46216e-07
1301	Zm00001d013906	490.081	-1.22752	0.187647	-6.54163	6.08529e-11	4.86138e-10
1302	Zm00001d013713	1774.21	-1.22737	0.124535	-9.85563	6.48078e-23	1.22755e-21
1303	Zm00001d012755	5153.88	-1.22535	0.16327	-7.50501	6.14228e-14	6.55563e-13
1304	Zm00001d046383	242.716	-1.22403	0.236379	-5.17825	2.23971e-07	1.17253e-06
1305	Zm00001d018667	11067.5	-1.22392	0.107602	-11.3745	5.60315e-30	1.49435e-28
1306	Zm00001d002130	59.9693	-1.22313	0.428131	-2.85691	0.00427793	0.0104301
1307	Zm00001d000659	55.4219	-1.22299	0.449155	-2.72287	0.00647176	0.015069
1308	zma-MIR159a	207.156	-1.22284	0.271263	-4.50794	6.54604e-06	2.76772e-05
1309	Zm00001d033327	119.544	-1.22243	0.350547	-3.48722	0.000488065	0.00146394
1310	Zm00001d053889	3719.68	-1.22185	0.107634	-11.3519	7.25862e-30	1.92904e-28
1311	Zm00001d045046	430.054	-1.22182	0.31185	-3.91795	8.93042e-05	0.000310628
1312	Zm00001d030624	1432.47	-1.22165	0.119138	-10.2541	1.13461e-24	2.34556e-23
1313	Zm00001d006845	1236.68	-1.22144	0.138287	-8.83259	1.02282e-18	1.53092e-17
1314	Zm00001d012126	3757.55	-1.22089	0.106441	-11.4701	1.86345e-30	5.17101e-29
1315	Zm00001d016895	693.33	-1.2203	0.154816	-7.88225	3.2155e-15	3.78956e-14
1316	Zm00001d043986	3880.43	-1.2199	0.115032	-10.6048	2.82919e-26	6.37936e-25
1317	Zm00001d011917	168.892	-1.21892	0.268836	-4.53405	5.78637e-06	2.46589e-05
1318	Zm00001d039854	1113.56	-1.21706	0.138225	-8.80491	1.30958e-18	1.94468e-17
1319	Zm00001d039286	60.1603	-1.21685	0.447791	-2.71746	0.00657856	0.0152941
1320	Zm00001d053221	196.517	-1.21525	0.263029	-4.62021	3.83343e-06	1.68311e-05
1321	Zm00001d013113	296.212	-1.21477	0.219464	-5.53518	3.10916e-08	1.81463e-07
1322	Zm00001d002449	2572.65	-1.21424	0.131817	-9.21156	3.21432e-20	5.19993e-19
1323	Zm00001d053252	59.9502	-1.21406	0.528186	-2.29855	0.0215305	0.0432445
1324	Zm00001d017703	1706.45	-1.21287	0.134853	-8.99397	2.38463e-19	3.69388e-18
1325	Zm00001d046781	306.693	-1.21213	0.205467	-5.89941	3.6481e-09	2.40401e-08
1326	Zm00001d017976	71.6108	-1.21163	0.461738	-2.62406	0.00868879	0.0195295
1327	Zm00001d032213	116.904	-1.2116	0.361897	-3.34793	0.00081419	0.00233026
1328	Zm00001d004392	366.76	-1.21112	0.21455	-5.64492	1.65258e-08	1.00039e-07
1329	Zm00001d018287	1720.47	-1.21079	0.132991	-9.10433	8.68044e-20	1.37189e-18
1330	Zm00001d039971	2275.91	-1.20984	0.116309	-10.402	2.42838e-25	5.2156e-24
1331	Zm00001d047677	1186.51	-1.20868	0.152609	-7.92011	2.37294e-15	2.83499e-14
1332	Zm00001d021816	508.628	-1.20755	0.252556	-4.7813	1.74164e-06	8.03527e-06
1333	Zm00001d041746	2096.8	-1.20681	0.131893	-9.14986	5.70066e-20	9.11138e-19
1334	Zm00001d033256	176.513	-1.20675	0.351735	-3.43086	0.00060167	0.00177018
1335	Zm00001d039276	1104.57	-1.20667	0.162292	-7.43517	1.04435e-13	1.09053e-12
1336	Zm00001d003149	419.221	-1.20627	0.217626	-5.54287	2.97557e-08	1.7407e-07
1337	Zm00001d014880	3718.62	-1.20579	0.116562	-10.3446	4.42617e-25	9.28593e-24
1338	Zm00001d020094	68.1305	-1.20571	0.409982	-2.94089	0.00327274	0.00821125
1339	Zm00001d011918	597.766	-1.20483	0.168861	-7.13505	9.67539e-13	9.20566e-12
1340	Zm00001d046465	106.255	-1.20447	0.374353	-3.21747	0.00129325	0.00354351
1341	Zm00001d029304	1383.43	-1.20447	0.202475	-5.94873	2.70232e-09	1.80815e-08
1342	Zm00001d044081	3469.61	-1.20374	0.195474	-6.15805	7.36446e-10	5.22443e-09
1343	Zm00001d042603	1234.67	-1.20339	0.158424	-7.59602	3.05389e-14	3.3495e-13
1344	Zm00001d020382	579.377	-1.20278	0.201271	-5.97593	2.28787e-09	1.54041e-08
1345	Zm00001d022050	1623.27	-1.20276	0.121536	-9.8963	4.3196e-23	8.27198e-22
1346	Zm00001d012994	85.3777	-1.20206	0.360544	-3.33401	0.000856033	0.00244198
1347	Zm00001d029488	96.4077	-1.20134	0.401385	-2.99299	0.00276261	0.00705102
1348	Zm00001d017290	390.711	-1.20072	0.24806	-4.84045	1.29543e-06	6.09095e-06
1349	Zm00001d053004	64.212	-1.20056	0.479811	-2.50215	0.0123443	0.0264675
1350	Zm00001d032732	1693.35	-1.19971	0.128329	-9.34872	8.87111e-21	1.48835e-19
1351	Zm00001d026192	1590.11	-1.19676	0.12258	-9.76311	1.6211e-22	3.01503e-21
1352	Zm00001d047726	910.883	-1.19598	0.14346	-8.33669	7.63969e-17	1.01575e-15
1353	Zm00001d047779	165.101	-1.19587	0.268238	-4.45826	8.26261e-06	3.43632e-05
1354	Zm00001d043701	76.9637	-1.19449	0.41882	-2.85203	0.0043441	0.0105698
1355	Zm00001d029668	639.035	-1.19405	0.522508	-2.28524	0.022299	0.0446019
1356	Zm00001d022594	918.913	-1.19202	0.153245	-7.77851	7.33839e-15	8.39904e-14
1357	Zm00001d018983	435.603	-1.1908	0.236495	-5.03521	4.77322e-07	2.3804e-06
1358	Zm00001d041889	18093.2	-1.19045	0.095156	-12.5105	6.53834e-36	2.26449e-34
1359	Zm00001d032505	1871.35	-1.19045	0.137697	-8.64542	5.36086e-18	7.64446e-17
1360	Zm00001d034729	227.512	-1.19031	0.275248	-4.32451	1.52874e-05	6.06666e-05
1361	Zm00001d008287	3090.14	-1.18974	0.150271	-7.91728	2.42754e-15	2.89411e-14
1362	Zm00001d016947	273.379	-1.1896	0.298633	-3.98348	6.79137e-05	0.000240667
1363	Zm00001d000203	1322.22	-1.18875	0.181266	-6.55807	5.45084e-11	4.39331e-10
1364	Zm00001d021378	10080.1	-1.18784	0.0938626	-12.6551	1.0479e-36	3.76779e-35
1365	Zm00001d044599	739.664	-1.18782	0.181336	-6.55038	5.73908e-11	4.60756e-10
1366	Zm00001d047407	973.351	-1.18753	0.135513	-8.76324	1.8971e-18	2.78422e-17
1367	Zm00001d007549	93.3346	-1.18753	0.445132	-2.66781	0.00763479	0.017436
1368	Zm00001d048982	396.61	-1.18659	0.243033	-4.88243	1.04789e-06	5.00086e-06
1369	Zm00001d046950	59.4248	-1.186	0.436111	-2.71949	0.00653828	0.0152129
1370	Zm00001d046238	97.3485	-1.185	0.348964	-3.39575	0.000684405	0.00199183
1371	Zm00001d052318	555.464	-1.18436	0.169168	-7.0011	2.53969e-12	2.31604e-11
1372	Zm00001d014826	3625.2	-1.18434	0.128135	-9.24295	2.39791e-20	3.91844e-19
1373	Zm00001d052362	824.697	-1.18416	0.251655	-4.70548	2.53274e-06	1.14173e-05
1374	Zm00001d016893	44.3356	-1.18381	0.483097	-2.45045	0.0142676	0.0301117
1375	Zm00001d008693	553.108	-1.18369	0.162623	-7.27869	3.37067e-13	3.36116e-12
1376	Zm00001d016694	4044.49	-1.18365	0.125691	-9.4171	4.63728e-21	7.92255e-20
1377	Zm00001d022613	5438.51	-1.18313	0.142547	-8.2999	1.04199e-16	1.37009e-15
1378	Zm00001d048202	627.717	-1.18271	0.21638	-5.46591	4.60526e-08	2.63012e-07
1379	Zm00001d016884	665.39	-1.18157	0.16679	-7.08415	1.39896e-12	1.30685e-11
1380	Zm00001d037168	97.9448	-1.18072	0.376748	-3.13399	0.00172449	0.00459159
1381	Zm00001d018656	57.6622	-1.17686	0.419264	-2.80697	0.00500092	0.0119798
1382	Zm00001d039086	3200.37	-1.1745	0.113125	-10.3824	2.98316e-25	6.3409e-24
1383	Zm00001d022506	225.706	-1.17411	0.235762	-4.98006	6.35634e-07	3.11968e-06
1384	Zm00001d045478	33679.6	-1.17328	0.104369	-11.2417	2.54518e-29	6.63919e-28
1385	Zm00001d029313	49.3606	-1.17267	0.450905	-2.60069	0.0093036	0.0207117
1386	Zm00001d021521	390.056	-1.17247	0.181002	-6.47767	9.31479e-11	7.28183e-10
1387	Zm00001d036177	626.006	-1.17237	0.158809	-7.38226	1.55622e-13	1.60052e-12
1388	Zm00001d043515	173.054	-1.17073	0.380574	-3.07622	0.00209644	0.00548572
1389	Zm00001d018362	796.047	-1.17027	0.247047	-4.73702	2.16882e-06	9.86523e-06
1390	Zm00001d034804	983.37	-1.1695	0.167615	-6.97727	3.00968e-12	2.72268e-11
1391	Zm00001d012061	4367.68	-1.1693	0.107523	-10.8749	1.51875e-27	3.63855e-26
1392	Zm00001d042189	4489.7	-1.16854	0.100655	-11.6094	3.69329e-31	1.05066e-29
1393	Zm00001d010950	5127.53	-1.16842	0.110226	-10.6002	2.97208e-26	6.69488e-25
1394	Zm00001d008515	2631.43	-1.16836	0.108967	-10.7222	8.01096e-27	1.85251e-25
1395	Zm00001d035922	2523.72	-1.16808	0.178143	-6.55697	5.4913e-11	4.42434e-10
1396	Zm00001d001776	1035.52	-1.16664	0.155057	-7.5239	5.31661e-14	5.70131e-13
1397	Zm00001d039554	269.971	-1.16655	0.227825	-5.12039	3.04904e-07	1.56899e-06
1398	Zm00001d031194	95.3995	-1.16402	0.337194	-3.45208	0.000556288	0.00164846
1399	Zm00001d011630	159.499	-1.16306	0.344338	-3.37767	0.000731017	0.00211578
1400	Zm00001d048538	337.422	-1.16297	0.228322	-5.09357	3.51383e-07	1.79469e-06
1401	Zm00001d005154	1448.17	-1.1627	0.377855	-3.07712	0.00209013	0.00547112
1402	Zm00001d034678	4597.66	-1.16246	0.104203	-11.1557	6.71836e-29	1.70722e-27
1403	Zm00001d040986	2259.77	-1.16155	0.117108	-9.91867	3.45331e-23	6.66952e-22
1404	Zm00001d024778	135.747	-1.15957	0.434546	-2.66845	0.00762014	0.0174043
1405	Zm00001d039280	2343.14	-1.15898	0.163894	-7.07153	1.53239e-12	1.4221e-11
1406	Zm00001d052405	104.382	-1.15896	0.420283	-2.75757	0.00582326	0.0137358
1407	Zm00001d052396	628.388	-1.15838	0.199642	-5.80227	6.54223e-09	4.17492e-08
1408	Zm00001d031216	471.281	-1.15777	0.199624	-5.79977	6.64049e-09	4.23165e-08
1409	Zm00001d038911	181.813	-1.15687	0.391676	-2.95364	0.00314047	0.00791452
1410	Zm00001d008512	4012.57	-1.15567	0.111632	-10.3525	4.0779e-25	8.58713e-24
1411	Zm00001d034633	2951.14	-1.1547	0.140417	-8.22337	1.97861e-16	2.55559e-15
1412	Zm00001d029529	1304.64	-1.15424	0.159823	-7.222	5.12282e-13	5.00898e-12
1413	Zm00001d046839	105.526	-1.15403	0.327361	-3.52525	0.000423082	0.00128573
1414	Zm00001d043655	7151.84	-1.15366	0.098961	-11.6577	2.09624e-31	6.02395e-30
1415	Zm00001d007073	69.6856	-1.15338	0.46683	-2.47066	0.0134863	0.0286795
1416	Zm00001d001907	1089.12	-1.15324	0.19606	-5.88208	4.05133e-09	2.65041e-08
1417	Zm00001d020940	60.2122	-1.15296	0.492823	-2.3395	0.0193095	0.0393036
1418	Zm00001d029651	75.4865	-1.1526	0.420094	-2.74368	0.00607554	0.0142565
1419	Zm00001d048718	11409.8	-1.15228	0.118718	-9.70606	2.84104e-22	5.21533e-21
1420	Zm00001d017799	134.874	-1.15168	0.364775	-3.15722	0.0015928	0.00427368
1421	Zm00001d025166	1906.54	-1.15026	0.482818	-2.3824	0.0172004	0.0355157
1422	Zm00001d004810	4272.72	-1.14971	0.102924	-11.1705	5.68672e-29	1.45487e-27
1423	Zm00001d008842	281.915	-1.14936	0.260912	-4.40515	1.05711e-05	4.32284e-05
1424	Zm00001d018394	547.431	-1.1488	0.168946	-6.79978	1.0478e-11	9.02403e-11
1425	Zm00001d019505	277.215	-1.1478	0.210821	-5.44443	5.19712e-08	2.95099e-07
1426	Zm00001d027542	1445.03	-1.14673	0.145824	-7.86379	3.72685e-15	4.36944e-14
1427	Zm00001d007228	280.153	-1.14601	0.370965	-3.08925	0.0020066	0.0052732
1428	Zm00001d046937	941.866	-1.14563	0.184281	-6.21673	5.0763e-10	3.66908e-09
1429	Zm00001d021729	2132.86	-1.14557	0.108928	-10.5167	7.23674e-26	1.59363e-24
1430	Zm00001d022144	7123.14	-1.14446	0.101023	-11.3287	9.46221e-30	2.50582e-28
1431	Zm00001d033872	546.089	-1.14434	0.20506	-5.58052	2.39804e-08	1.42011e-07
1432	Zm00001d052097	791.649	-1.14418	0.242051	-4.72702	2.27842e-06	1.03389e-05
1433	Zm00001d041624	484.798	-1.14378	0.168978	-6.76884	1.29817e-11	1.10582e-10
1434	Zm00001d031599	127.621	-1.14367	0.283701	-4.03127	5.54774e-05	0.000199981
1435	Zm00001d024927	214.775	-1.14331	0.314306	-3.63759	0.000275203	0.000868908
1436	Zm00001d019641	911.366	-1.14252	0.202816	-5.63327	1.76827e-08	1.06558e-07
1437	Zm00001d016070	5063.56	-1.14147	0.12201	-9.35562	8.31136e-21	1.39858e-19
1438	Zm00001d002137	3214.64	-1.14037	0.160168	-7.11984	1.08054e-12	1.02292e-11
1439	Zm00001d017282	330.514	-1.14005	0.21495	-5.3038	1.13414e-07	6.16282e-07
1440	Zm00001d028308	475.037	-1.13969	0.167256	-6.81406	9.48807e-12	8.20896e-11
1441	Zm00001d009771	3381.1	-1.13935	0.115531	-9.86182	6.09359e-23	1.15712e-21
1442	Zm00001d020208	1577.25	-1.13899	0.152233	-7.48192	7.32434e-14	7.77322e-13
1443	Zm00001d030908	211.032	-1.13816	0.285698	-3.98377	6.78319e-05	0.000240524
1444	Zm00001d013992	655.583	-1.13786	0.168043	-6.77125	1.27672e-11	1.08836e-10
1445	Zm00001d034990	200.139	-1.13765	0.36049	-3.15583	0.00160041	0.00429307
1446	Zm00001d021775	168.972	-1.13695	0.273189	-4.16176	3.15808e-05	0.000119212
1447	Zm00001d016938	1434.61	-1.13593	0.141277	-8.04048	8.94897e-16	1.11142e-14
1448	Zm00001d018562	1538.44	-1.13589	0.219493	-5.17507	2.27829e-07	1.19218e-06
1449	Zm00001d026941	339.051	-1.13555	0.235584	-4.82017	1.43433e-06	6.69948e-06
1450	Zm00001d012508	1001.67	-1.13554	0.211471	-5.3697	7.88661e-08	4.38887e-07
1451	Zm00001d023923	64.4131	-1.13459	0.426833	-2.65816	0.00785675	0.0178995
1452	Zm00001d011748	493.179	-1.1341	0.206346	-5.4961	3.88293e-08	2.23907e-07
1453	Zm00001d022153	5650.11	-1.13295	0.156545	-7.23719	4.5807e-13	4.51011e-12
1454	Zm00001d038097	683.195	-1.13262	0.16604	-6.82134	9.01967e-12	7.83367e-11
1455	Zm00001d046842	147.819	-1.13213	0.277811	-4.07519	4.5976e-05	0.000168278
1456	Zm00001d016826	1504.82	-1.13175	0.131834	-8.58462	9.11365e-18	1.28021e-16
1457	Zm00001d037582	880.153	-1.13154	0.192773	-5.86981	4.36302e-09	2.84281e-08
1458	Zm00001d016193	4271.3	-1.13058	0.132956	-8.5034	1.8412e-17	2.52981e-16
1459	Zm00001d025807	290.5	-1.13046	0.210385	-5.37328	7.73156e-08	4.30576e-07
1460	Zm00001d032284	238.391	-1.13026	0.225938	-5.00251	5.65872e-07	2.79794e-06
1461	Zm00001d045338	74.0879	-1.13011	0.407084	-2.7761	0.00550148	0.013053
1462	Zm00001d044259	54.8812	-1.13001	0.462615	-2.44266	0.0145796	0.030687
1463	Zm00001d026273	1645.44	-1.12997	0.159373	-7.09015	1.3397e-12	1.25357e-11
1464	Zm00001d026577	5174.65	-1.12735	0.107883	-10.4497	1.46943e-25	3.19237e-24
1465	Zm00001d027674	78.4709	-1.12704	0.421579	-2.67338	0.00750909	0.0171836
1466	Zm00001d007840	7856.22	-1.12622	0.126139	-8.92836	4.32362e-19	6.5936e-18
1467	Zm00001d006750	5146.01	-1.12615	0.121895	-9.2387	2.49505e-20	4.06835e-19
1468	Zm00001d011579	1831.7	-1.12554	0.12659	-8.89127	6.04126e-19	9.13908e-18
1469	Zm00001d034828	974.962	-1.12525	0.143468	-7.84322	4.39141e-15	5.10885e-14
1470	Zm00001d052269	541.475	-1.12506	0.235919	-4.76885	1.85283e-06	8.50836e-06
1471	Zm00001d008121	224.048	-1.1246	0.271252	-4.14595	3.3841e-05	0.000127029
1472	Zm00001d050406	2625.9	-1.12418	0.111715	-10.0629	8.06122e-24	1.59783e-22
1473	Zm00001d027815	176.834	-1.12413	0.330324	-3.40311	0.00066623	0.00194369
1474	Zm00001d005479	151.908	-1.12363	0.314747	-3.56996	0.000357039	0.00110206
1475	Zm00001d003151	716.611	-1.12354	0.152705	-7.35759	1.87263e-13	1.91289e-12
1476	Zm00001d006133	1069.44	-1.12172	0.195419	-5.74008	9.46346e-09	5.91885e-08
1477	Zm00001d024679	2180.16	-1.12108	0.119888	-9.35105	8.67799e-21	1.45811e-19
1478	Zm00001d050132	944.913	-1.12097	0.180706	-6.20327	5.53015e-10	3.97678e-09
1479	Zm00001d042634	1071.68	-1.12096	0.144188	-7.77427	7.58844e-15	8.66768e-14
1480	Zm00001d042214	142.637	-1.12084	0.346601	-3.23379	0.00122157	0.00336711
1481	Zm00001d001915	90.7639	-1.1204	0.407495	-2.74948	0.005969	0.0140327
1482	Zm00001d003280	709.712	-1.11902	0.168588	-6.63759	3.18862e-11	2.62042e-10
1483	Zm00001d016682	65.8267	-1.1185	0.475539	-2.35208	0.018669	0.0381372
1484	Zm00001d027911	357.379	-1.11797	0.201846	-5.53874	3.04651e-08	1.7799e-07
1485	Zm00001d044547	552.689	-1.11749	0.209207	-5.34153	9.2164e-08	5.0789e-07
1486	Zm00001d040831	10430.5	-1.11716	0.116905	-9.5562	1.22157e-21	2.16005e-20
1487	Zm00001d028835	287.156	-1.11666	0.238149	-4.68891	2.74665e-06	1.2308e-05
1488	Zm00001d038948	460.174	-1.11547	0.2409	-4.63041	3.64941e-06	1.60919e-05
1489	Zm00001d051499	45.1112	-1.11513	0.493767	-2.25842	0.0239194	0.0473241
1490	Zm00001d028309	1459.57	-1.11503	0.127824	-8.72314	2.70601e-18	3.92051e-17
1491	Zm00001d013588	10749.7	-1.11496	0.15329	-7.27356	3.50131e-13	3.48836e-12
1492	Zm00001d048127	2825.14	-1.11487	0.124397	-8.96223	3.18168e-19	4.89169e-18
1493	Zm00001d049525	1232.95	-1.11378	0.146963	-7.57863	3.49232e-14	3.80271e-13
1494	Zm00001d043129	1751.98	-1.11372	0.140861	-7.9065	2.64726e-15	3.14116e-14
1495	Zm00001d040589	126.432	-1.11321	0.393481	-2.82914	0.00466738	0.0112631
1496	Zm00001d043589	2460.87	-1.11279	0.163628	-6.80072	1.04097e-11	8.96858e-11
1497	Zm00001d024518	5018.02	-1.11031	0.133134	-8.33976	7.44411e-17	9.90912e-16
1498	Zm00001d045051	276.476	-1.10961	0.25819	-4.29765	1.72618e-05	6.79062e-05
1499	Zm00001d014949	888.867	-1.10903	0.164305	-6.7498	1.48049e-11	1.25357e-10
1500	Zm00001d026368	980.926	-1.10873	0.161071	-6.88346	5.84165e-12	5.15872e-11
1501	Zm00001d042658	3854.4	-1.10788	0.119645	-9.25972	2.04963e-20	3.36879e-19
1502	Zm00001d024722	2554.38	-1.10645	0.129091	-8.57107	1.02527e-17	1.43665e-16
1503	Zm00001d021345	79.9477	-1.10622	0.42826	-2.58305	0.00979308	0.0216395
1504	ENSRNA049997483	177.88	-1.10546	0.268931	-4.11057	3.94678e-05	0.000146353
1505	Zm00001d020694	1682.27	-1.10528	0.134573	-8.21329	2.15205e-16	2.77485e-15
1506	Zm00001d037579	165.769	-1.10499	0.273704	-4.03716	5.41027e-05	0.000195524
1507	Zm00001d037615	59.2821	-1.10494	0.473026	-2.3359	0.0194967	0.0396312
1508	Zm00001d007534	617.912	-1.10392	0.169917	-6.49681	8.20404e-11	6.45814e-10
1509	Zm00001d045534	2381.94	-1.1026	0.150867	-7.30847	2.70191e-13	2.7231e-12
1510	Zm00001d023736	4981.24	-1.10213	0.136444	-8.07752	6.60994e-16	8.29121e-15
1511	Zm00001d026427	467.582	-1.10186	0.172072	-6.40347	1.51887e-10	1.16089e-09
1512	Zm00001d045950	480.229	-1.10114	0.178935	-6.15386	7.56182e-10	5.35939e-09
1513	Zm00001d008454	754.744	-1.10089	0.149389	-7.36926	1.71576e-13	1.7598e-12
1514	Zm00001d038480	522.875	-1.10041	0.206603	-5.32621	1.00283e-07	5.48887e-07
1515	Zm00001d031894	3228.39	-1.09976	0.102647	-10.714	8.75377e-27	2.02222e-25
1516	Zm00001d001947	1013.37	-1.09968	0.137214	-8.01438	1.10697e-15	1.36283e-14
1517	Zm00001d013529	310.314	-1.09895	0.230189	-4.7741	1.8051e-06	8.2993e-06
1518	Zm00001d045314	799.819	-1.09802	0.137582	-7.98083	1.45348e-15	1.76961e-14
1519	Zm00001d028386	1368.95	-1.09775	0.144481	-7.59783	3.01129e-14	3.30438e-13
1520	Zm00001d047878	105.034	-1.09774	0.331798	-3.30845	0.00093814	0.00265113
1521	Zm00001d029573	2283.28	-1.09753	0.124232	-8.83453	1.00516e-18	1.50548e-17
1522	Zm00001d000152	386.88	-1.09592	0.249728	-4.38846	1.14156e-05	4.64012e-05
1523	Zm00001d009088	326.487	-1.09563	0.192988	-5.67719	1.36928e-08	8.406e-08
1524	Zm00001d007400	121.125	-1.09561	0.355054	-3.08575	0.00203037	0.00532947
1525	Zm00001d051056	4218.71	-1.09523	0.114402	-9.5735	1.0335e-21	1.8419e-20
1526	Zm00001d047555	261.094	-1.09437	0.229725	-4.76384	1.8994e-06	8.70101e-06
1527	Zm00001d011644	140.008	-1.09392	0.399201	-2.74028	0.00613861	0.0143896
1528	Zm00001d003067	338.937	-1.09373	0.207962	-5.25926	1.44637e-07	7.77724e-07
1529	Zm00001d036651	76.9169	-1.09364	0.38299	-2.85554	0.00429636	0.0104683
1530	Zm00001d047301	74.3777	-1.09249	0.385101	-2.8369	0.00455538	0.0110269
1531	Zm00001d043128	312.716	-1.09249	0.248703	-4.39276	1.11919e-05	4.5541e-05
1532	Zm00001d021442	2840.78	-1.09226	0.146059	-7.47819	7.53546e-14	7.98977e-13
1533	Zm00001d044461	3572.06	-1.09204	0.119071	-9.17139	4.66956e-20	7.47923e-19
1534	Zm00001d022530	1249.76	-1.09153	0.2295	-4.7561	1.97364e-06	9.02647e-06
1535	Zm00001d048329	1626.46	-1.09099	0.148918	-7.32616	2.36844e-13	2.39869e-12
1536	Zm00001d022075	102.729	-1.08992	0.424641	-2.56668	0.0102677	0.0225516
1537	Zm00001d041471	1959.6	-1.08957	0.116586	-9.34564	9.13389e-21	1.5313e-19
1538	Zm00001d030285	382.434	-1.08948	0.184847	-5.89395	3.7707e-09	2.48046e-08
1539	Zm00001d013702	276.399	-1.08909	0.22676	-4.80282	1.56443e-06	7.26809e-06
1540	Zm00001d034777	2380.86	-1.08829	0.127728	-8.52035	1.59071e-17	2.19363e-16
1541	Zm00001d034448	174.302	-1.08811	0.302145	-3.60128	0.000316654	0.000986426
1542	Zm00001d042768	77.8898	-1.08798	0.415413	-2.61902	0.00881819	0.0197751
1543	Zm00001d018797	804.714	-1.08771	0.204048	-5.33066	9.78546e-08	5.36114e-07
1544	Zm00001d005497	1337.33	-1.0875	0.146122	-7.44237	9.88924e-14	1.03544e-12
1545	Zm00001d010800	175.507	-1.08741	0.264913	-4.1048	4.0466e-05	0.000149784
1546	Zm00001d017563	1378.42	-1.08733	0.145917	-7.45173	9.21209e-14	9.69027e-13
1547	Zm00001d010576	432.994	-1.08732	0.217845	-4.99127	5.99824e-07	2.95663e-06
1548	Zm00001d003648	3202.22	-1.08681	0.114218	-9.51524	1.81286e-21	3.17335e-20
1549	Zm00001d016764	1505.15	-1.08676	0.184154	-5.90134	3.60551e-09	2.37743e-08
1550	Zm00001d014755	77.5183	-1.08638	0.403946	-2.68942	0.00715772	0.0164746
1551	Zm00001d006527	867.917	-1.08622	0.163268	-6.65298	2.87209e-11	2.36717e-10
1552	Zm00001d007477	828.561	-1.08578	0.183006	-5.933	2.97444e-09	1.98144e-08
1553	Zm00001d023372	16070.9	-1.08482	0.103785	-10.4526	1.42613e-25	3.10128e-24
1554	Zm00001d021132	3064.91	-1.08469	0.12314	-8.80859	1.26732e-18	1.88564e-17
1555	Zm00001d008620	85518.7	-1.08373	0.123806	-8.75346	2.06902e-18	3.02672e-17
1556	Zm00001d018742	6991.94	-1.08301	0.102632	-10.5524	4.95238e-26	1.09915e-24
1557	Zm00001d031019	4015.47	-1.08281	0.115688	-9.35971	7.99558e-21	1.34645e-19
1558	Zm00001d025580	1349.22	-1.08238	0.174482	-6.20338	5.5262e-10	3.97521e-09
1559	Zm00001d047392	1649.56	-1.08228	0.136662	-7.91937	2.38717e-15	2.84849e-14
1560	Zm00001d053858	3927.56	-1.08206	0.12398	-8.7277	2.59909e-18	3.77043e-17
1561	Zm00001d032204	219.452	-1.08082	0.25651	-4.21354	2.51399e-05	9.64971e-05
1562	Zm00001d032777	270.628	-1.08068	0.252836	-4.27423	1.91799e-05	7.5021e-05
1563	Zm00001d036280	1590.38	-1.07944	0.152539	-7.07645	1.47898e-12	1.37479e-11
1564	Zm00001d022563	418.845	-1.07846	0.223799	-4.81888	1.44366e-06	6.74024e-06
1565	Zm00001d049726	137.368	-1.07798	0.292871	-3.68072	0.000232574	0.000746297
1566	Zm00001d006467	2390.5	-1.07599	0.171797	-6.26318	3.77205e-10	2.76348e-09
1567	Zm00001d028171	131.528	-1.07501	0.314792	-3.41498	0.000637868	0.00186672
1568	Zm00001d047402	1089.34	-1.07357	0.211803	-5.06873	4.00475e-07	2.01988e-06
1569	Zm00001d040988	1634.21	-1.0731	0.398721	-2.69136	0.00711607	0.0163937
1570	Zm00001d019230	1543.64	-1.07185	0.155655	-6.88607	5.73555e-12	5.07096e-11
1571	Zm00001d042244	68.5598	-1.07096	0.413294	-2.59127	0.00956222	0.021206
1572	Zm00001d010894	509.085	-1.07079	0.245591	-4.36006	1.30028e-05	5.23164e-05
1573	Zm00001d053011	9456.66	-1.07067	0.0954689	-11.2149	3.44682e-29	8.96014e-28
1574	Zm00001d033337	1089.5	-1.06978	0.129101	-8.28636	1.16765e-16	1.52822e-15
1575	Zm00001d038861	2426	-1.06932	0.125429	-8.52533	1.52369e-17	2.10635e-16
1576	Zm00001d006019	431.119	-1.06912	0.203387	-5.25657	1.46768e-07	7.88246e-07
1577	Zm00001d040032	84.9186	-1.06866	0.397564	-2.68802	0.00718781	0.0165354
1578	Zm00001d016406	5855.85	-1.06805	0.12545	-8.51369	1.68484e-17	2.3192e-16
1579	Zm00001d020723	435.188	-1.06786	0.209464	-5.09808	3.43116e-07	1.75524e-06
1580	Zm00001d008812	2104.34	-1.06757	0.131688	-8.10678	5.1978e-16	6.56357e-15
1581	Zm00001d021180	1544.71	-1.06744	0.119489	-8.93336	4.13264e-19	6.31513e-18
1582	Zm00001d038440	1823.2	-1.06697	0.128642	-8.29411	1.09402e-16	1.43601e-15
1583	Zm00001d041390	760.503	-1.06621	0.158736	-6.71689	1.85645e-11	1.55964e-10
1584	Zm00001d025888	183.784	-1.06609	0.261947	-4.06986	4.70415e-05	0.000171789
1585	Zm00001d047461	376.996	-1.06522	0.194118	-5.48748	4.077e-08	2.345e-07
1586	Zm00001d001908	1582.18	-1.06467	0.122169	-8.71471	2.91506e-18	4.22068e-17
1587	Zm00001d047268	351.294	-1.06407	0.197846	-5.37826	7.52092e-08	4.19465e-07
1588	Zm00001d017768	526.397	-1.0638	0.182568	-5.82686	5.64798e-09	3.6278e-08
1589	Zm00001d040158	206.221	-1.06352	0.260594	-4.08112	4.482e-05	0.000164447
1590	Zm00001d007802	2426.16	-1.06349	0.121845	-8.72826	2.58618e-18	3.75652e-17
1591	Zm00001d047107	271.105	-1.06343	0.21812	-4.87545	1.0856e-06	5.17426e-06
1592	Zm00001d006354	384.693	-1.06334	0.220681	-4.81844	1.44686e-06	6.75242e-06
1593	Zm00001d041824	163.455	-1.06254	0.331336	-3.20682	0.00134209	0.00366445
1594	Zm00001d048235	1762.85	-1.06211	0.123042	-8.63213	6.02201e-18	8.53879e-17
1595	Zm00001d008389	506.783	-1.06128	0.180209	-5.88917	3.88147e-09	2.5474e-08
1596	Zm00001d007369	3289.71	-1.06067	0.111562	-9.50745	1.95392e-21	3.4097e-20
1597	Zm00001d045215	1567.88	-1.0602	0.190222	-5.57346	2.49723e-08	1.4746e-07
1598	Zm00001d028055	680.959	-1.06013	0.15259	-6.94759	3.71577e-12	3.33211e-11
1599	Zm00001d004804	905.493	-1.05867	0.142872	-7.40992	1.26379e-13	1.3099e-12
1600	Zm00001d021342	998.827	-1.0577	0.158157	-6.68766	2.26761e-11	1.88753e-10
1601	Zm00001d043166	552.456	-1.05661	0.157982	-6.68818	2.25965e-11	1.8816e-10
1602	Zm00001d012667	11624.1	-1.0561	0.113264	-9.32422	1.11802e-20	1.86883e-19
1603	Zm00001d026321	652.856	-1.05497	0.162211	-6.5037	7.83678e-11	6.19276e-10
1604	Zm00001d033369	16965.1	-1.05492	0.112697	-9.36067	7.9229e-21	1.3362e-19
1605	Zm00001d039005	4718.28	-1.05452	0.13554	-7.78012	7.24535e-15	8.30096e-14
1606	Zm00001d024828	3791.71	-1.05437	0.105887	-9.9575	2.3387e-23	4.5479e-22
1607	Zm00001d001806	1000.95	-1.05363	0.203993	-5.16504	2.40385e-07	1.2541e-06
1608	Zm00001d021069	56.7001	-1.05284	0.455583	-2.31097	0.0208343	0.0420366
1609	Zm00001d016564	261.199	-1.05258	0.24138	-4.36067	1.29662e-05	5.21818e-05
1610	Zm00001d015293	4382.92	-1.05175	0.123727	-8.50055	1.88687e-17	2.59099e-16
1611	Zm00001d047548	195.901	-1.05149	0.342031	-3.07425	0.0021103	0.00551752
1612	Zm00001d028313	346.927	-1.05137	0.268049	-3.92231	8.77045e-05	0.000305346
1613	Zm00001d028318	80.1175	-1.05099	0.414246	-2.53712	0.0111768	0.024283
1614	Zm00001d000093	221.775	-1.0503	0.26062	-4.03001	5.57741e-05	0.000200986
1615	Zm00001d028297	2079.25	-1.05013	0.135513	-7.7493	9.23981e-15	1.04903e-13
1616	Zm00001d023481	640.846	-1.04998	0.170015	-6.17582	6.58224e-10	4.6975e-09
1617	Zm00001d030950	679.842	-1.04953	0.164513	-6.37961	1.77537e-10	1.34783e-09
1618	Zm00001d048829	2583.82	-1.04858	0.126119	-8.31421	9.23679e-17	1.21949e-15
1619	Zm00001d010434	374.637	-1.04843	0.208801	-5.02118	5.13546e-07	2.55036e-06
1620	Zm00001d041923	3416.94	-1.04778	0.106571	-9.83174	8.21875e-23	1.54638e-21
1621	Zm00001d039394	455.238	-1.04743	0.206713	-5.06706	4.04012e-07	2.03622e-06
1622	Zm00001d024861	1367.79	-1.04578	0.123877	-8.44213	3.11598e-17	4.23306e-16
1623	Zm00001d044970	152.743	-1.04563	0.267814	-3.90432	9.44921e-05	0.000327414
1624	Zm00001d045055	224.695	-1.04562	0.344688	-3.03353	0.00241711	0.0062489
1625	Zm00001d019403	119.56	-1.04503	0.347475	-3.0075	0.0026341	0.00675352
1626	Zm00001d038538	431.557	-1.04496	0.226415	-4.61524	3.92645e-06	1.72094e-05
1627	Zm00001d052165	556.485	-1.0432	0.214712	-4.85858	1.18229e-06	5.59973e-06
1628	Zm00001d008966	379.242	-1.04291	0.196662	-5.30305	1.13885e-07	6.18692e-07
1629	Zm00001d030464	110.951	-1.04289	0.458092	-2.27659	0.0228109	0.0454569
1630	Zm00001d049286	190.703	-1.04216	0.381543	-2.73144	0.00630579	0.0147281
1631	Zm00001d019102	108.425	-1.042	0.325726	-3.19902	0.00137898	0.0037525
1632	Zm00001d028401	19305.6	-1.04107	0.118665	-8.77313	1.7376e-18	2.56679e-17
1633	Zm00001d026439	3259.88	-1.04105	0.154221	-6.75039	1.47448e-11	1.24895e-10
1634	Zm00001d037666	1447.75	-1.04082	0.12172	-8.55092	1.22115e-17	1.70269e-16
1635	Zm00001d009600	2578.45	-1.03998	0.132966	-7.82142	5.22292e-15	6.0513e-14
1636	Zm00001d037771	1182.8	-1.03957	0.155289	-6.6944	2.16556e-11	1.80724e-10
1637	Zm00001d031119	305.593	-1.03926	0.236116	-4.40148	1.07517e-05	4.39142e-05
1638	Zm00001d021512	1342.31	-1.03914	0.129438	-8.02811	9.89848e-16	1.22464e-14
1639	Zm00001d041590	1879.22	-1.03899	0.139136	-7.46749	8.17381e-14	8.63826e-13
1640	Zm00001d026521	601.784	-1.03851	0.226437	-4.58629	4.51191e-06	1.95894e-05
1641	Zm00001d011775	707.199	-1.03687	0.170274	-6.08941	1.13326e-09	7.87883e-09
1642	Zm00001d027472	245.83	-1.03498	0.284925	-3.63249	0.000280704	0.000885042
1643	Zm00001d031465	129.186	-1.03436	0.295321	-3.50248	0.000460949	0.00139016
1644	Zm00001d010290	986.127	-1.03432	0.130608	-7.91933	2.38802e-15	2.84849e-14
1645	Zm00001d006460	1510.72	-1.03377	0.142408	-7.25923	3.89305e-13	3.85994e-12
1646	Zm00001d029164	92.7446	-1.03367	0.359756	-2.87326	0.00406257	0.00996088
1647	Zm00001d037052	2799.08	-1.03354	0.159316	-6.48737	8.73487e-11	6.8593e-10
1648	Zm00001d013982	705.737	-1.03354	0.17144	-6.02859	1.65398e-09	1.1284e-08
1649	Zm00001d006127	1755.2	-1.03286	0.130463	-7.91689	2.43526e-15	2.90178e-14
1650	Zm00001d046953	348.463	-1.03245	0.182943	-5.64355	1.66575e-08	1.00783e-07
1651	Zm00001d017932	128.369	-1.03232	0.335448	-3.07744	0.00208784	0.00546701
1652	Zm00001d004998	120.7	-1.03123	0.293574	-3.51265	0.000443654	0.0013423
1653	Zm00001d027386	748.468	-1.03107	0.172257	-5.98565	2.15528e-09	1.45548e-08
1654	Zm00001d033187	723.313	-1.03071	0.223112	-4.61972	3.84264e-06	1.68682e-05
1655	Zm00001d047757	26605.4	-1.03019	0.113474	-9.07864	1.09941e-19	1.73029e-18
1656	Zm00001d003114	1452.86	-1.03016	0.138764	-7.42381	1.13802e-13	1.18551e-12
1657	Zm00001d041854	1382.34	-1.02951	0.127947	-8.04638	8.52764e-16	1.06201e-14
1658	Zm00001d017913	6563.37	-1.0289	0.118439	-8.68716	3.71628e-18	5.33973e-17
1659	Zm00001d037318	350.767	-1.02784	0.213949	-4.80415	1.55412e-06	7.22319e-06
1660	Zm00001d048161	77.0878	-1.02734	0.439285	-2.33868	0.0193522	0.039373
1661	Zm00001d038587	7701.68	-1.02652	0.134211	-7.64855	2.03258e-14	2.2578e-13
1662	Zm00001d044373	524.452	-1.02641	0.184107	-5.57507	2.47432e-08	1.46184e-07
1663	Zm00001d027756	6076.45	-1.02617	0.159133	-6.4485	1.12963e-10	8.74326e-10
1664	Zm00001d047883	228.94	-1.02568	0.279467	-3.67011	0.000242445	0.000773908
1665	Zm00001d027337	7402.53	-1.02494	0.0999171	-10.2579	1.0906e-24	2.25664e-23
1666	Zm00001d041753	1547.42	-1.02473	0.124727	-8.21583	2.1071e-16	2.71999e-15
1667	Zm00001d011680	2687.76	-1.02448	0.133329	-7.68383	1.54399e-14	1.7364e-13
1668	Zm00001d020871	75.4001	-1.02431	0.447018	-2.29144	0.0219379	0.043973
1669	Zm00001d007768	510.324	-1.02342	0.180313	-5.67576	1.38076e-08	8.46496e-08
1670	Zm00001d022139	4232.53	-1.023	0.115327	-8.87042	7.2871e-19	1.09797e-17
1671	Zm00001d012479	167.808	-1.0229	0.347649	-2.94233	0.00325753	0.00817763
1672	Zm00001d004094	5106.87	-1.02243	0.117561	-8.69705	3.40625e-18	4.90362e-17
1673	Zm00001d034571	225.057	-1.0221	0.237787	-4.2984	1.72038e-05	6.77371e-05
1674	Zm00001d010558	502.995	-1.02199	0.181328	-5.63616	1.73886e-08	1.04897e-07
1675	Zm00001d039584	873.48	-1.02193	0.17039	-5.9976	2.00254e-09	1.35435e-08
1676	Zm00001d011895	191.328	-1.02166	0.293605	-3.47971	0.000501948	0.0015014
1677	Zm00001d025392	490.745	-1.01966	0.176638	-5.77259	7.80622e-09	4.93557e-08
1678	Zm00001d003645	2511.33	-1.01899	0.137359	-7.41846	1.18493e-13	1.23098e-12
1679	Zm00001d021599	6613.74	-1.01894	0.121192	-8.4076	4.18493e-17	5.65391e-16
1680	Zm00001d018917	414.726	-1.01881	0.202095	-5.04123	4.62555e-07	2.31185e-06
1681	Zm00001d039294	961.141	-1.01871	0.137682	-7.39902	1.37198e-13	1.41878e-12
1682	Zm00001d043477	80.2467	-1.01857	0.376566	-2.7049	0.00683256	0.0158205
1683	Zm00001d011363	1125.8	-1.01845	0.124739	-8.16467	3.22309e-16	4.11362e-15
1684	Zm00001d052738	1448.4	-1.01804	0.200151	-5.08636	3.65007e-07	1.85714e-06
1685	Zm00001d033315	1415.55	-1.01796	0.1303	-7.81244	5.60925e-15	6.48563e-14
1686	Zm00001d052393	1885.03	-1.01737	0.196901	-5.16692	2.37983e-07	1.24214e-06
1687	Zm00001d025395	476.041	-1.01716	0.183663	-5.53817	3.05655e-08	1.78484e-07
1688	Zm00001d007949	1724.94	-1.01701	0.169225	-6.00979	1.8576e-09	1.26085e-08
1689	Zm00001d017558	729.483	-1.01699	0.171334	-5.93572	2.92554e-09	1.95174e-08
1690	Zm00001d043860	656.51	-1.01693	0.155979	-6.5197	7.04458e-11	5.59411e-10
1691	Zm00001d053322	70.7106	-1.01657	0.404294	-2.51444	0.0119222	0.0256817
1692	Zm00001d021491	67.121	-1.01614	0.376975	-2.69551	0.00702802	0.0162172
1693	Zm00001d016851	211.142	-1.01597	0.253299	-4.01094	6.04785e-05	0.000216524
1694	Zm00001d035846	107.695	-1.01554	0.318816	-3.18534	0.00144585	0.00391655
1695	Zm00001d041222	255.457	-1.01493	0.232272	-4.36956	1.24497e-05	5.02522e-05
1696	Zm00001d050712	294.438	-1.01437	0.24152	-4.19994	2.66984e-05	0.000102064
1697	Zm00001d003493	717.168	-1.01391	0.177701	-5.70571	1.15858e-08	7.1807e-08
1698	Zm00001d027665	4689.26	-1.01367	0.146441	-6.92207	4.45089e-12	3.9646e-11
1699	Zm00001d053053	1518.87	-1.01352	0.150354	-6.74087	1.57436e-11	1.33006e-10
1700	Zm00001d047103	1337.45	-1.01329	0.127158	-7.96878	1.60249e-15	1.94431e-14
1701	Zm00001d021351	497.791	-1.01311	0.17769	-5.70153	1.18738e-08	7.34515e-08
1702	Zm00001d001839	83.2113	-1.01257	0.364926	-2.77472	0.00552488	0.0131017
1703	Zm00001d013991	98.5271	-1.01248	0.349497	-2.89696	0.003768	0.00931641
1704	Zm00001d039113	115.624	-1.0107	0.357703	-2.82553	0.0047203	0.0113762
1705	Zm00001d028964	797.292	-1.00981	0.177361	-5.6935	1.24458e-08	7.67799e-08
1706	Zm00001d036437	434.05	-1.00909	0.249522	-4.04409	5.25277e-05	0.000190166
1707	Zm00001d020418	128.946	-1.00865	0.36896	-2.73377	0.00626137	0.0146349
1708	Zm00001d041476	97.0764	-1.0081	0.38484	-2.61953	0.00880521	0.0197519
1709	Zm00001d047766	3308.86	-1.00711	0.111866	-9.00283	2.19974e-19	3.40982e-18
1710	Zm00001d039932	126.858	-1.0071	0.333823	-3.01685	0.00255413	0.00656784
1711	Zm00001d011585	331.524	-1.00665	0.228296	-4.40939	1.03662e-05	4.24405e-05
1712	Zm00001d015103	2079.13	-1.00664	0.121202	-8.30547	9.94254e-17	1.30961e-15
1713	Zm00001d038867	2167.95	-1.00658	0.158885	-6.33524	2.36968e-10	1.77813e-09
1714	Zm00001d027375	3599.79	-1.00623	0.110413	-9.11333	7.98912e-20	1.26794e-18
1715	Zm00001d047587	2186.35	-1.00577	0.126426	-7.95538	1.78577e-15	2.15627e-14
1716	Zm00001d032306	110.096	-1.00484	0.319737	-3.14272	0.00167384	0.00446936
1717	Zm00001d038164	1121.72	-1.00445	0.441696	-2.27407	0.0229621	0.0457219
1718	Zm00001d005504	251.622	-1.00401	0.283539	-3.54099	0.000398629	0.00121764
1719	Zm00001d033046	1880.48	-1.00331	0.14004	-7.16445	7.81015e-13	7.48451e-12
1720	Zm00001d018485	1825.16	-1.00306	0.126926	-7.90268	2.72978e-15	3.23228e-14
1721	Zm00001d033334	594.492	-1.00301	0.175145	-5.72677	1.02363e-08	6.37051e-08
1722	Zm00001d011652	5316.97	-1.00256	0.184348	-5.43843	5.37533e-08	3.04683e-07
1723	Zm00001d052194	7477.06	-1.00052	0.441799	-2.26465	0.0235341	0.0466598
1724	Zm00001d024808	805.944	-1.00018	0.141268	-7.08002	1.4413e-12	1.34194e-11
1725	Zm00001d008883	176.658	1.0006	0.3065	3.26461	0.00109614	0.00304887
1726	Zm00001d016100	1854.7	1.00138	0.116545	8.59218	8.5337e-18	1.20098e-16
1727	Zm00001d000320	2535.85	1.00165	0.138931	7.2097	5.60742e-13	5.44749e-12
1728	Zm00001d009746	712.844	1.00198	0.17694	5.66281	1.4891e-08	9.07506e-08
1729	Zm00001d022513	63361.9	1.00222	0.103702	9.66441	4.27077e-22	7.75805e-21
1730	Zm00001d003181	1588.37	1.00229	0.137652	7.28129	3.30652e-13	3.3001e-12
1731	Zm00001d010784	1060.67	1.00311	0.153731	6.52507	6.7972e-11	5.40716e-10
1732	Zm00001d050193	27746.1	1.00313	0.106522	9.41717	4.63429e-21	7.92255e-20
1733	Zm00001d014530	473.091	1.00332	0.197163	5.08877	3.60394e-07	1.83615e-06
1734	Zm00001d006336	903.698	1.00359	0.17141	5.85488	4.77341e-09	3.09416e-08
1735	Zm00001d003334	361.271	1.00365	0.187723	5.34642	8.97095e-08	4.94846e-07
1736	Zm00001d042305	1327.26	1.00383	0.137599	7.2953	2.97992e-13	2.9913e-12
1737	Zm00001d006116	66.3226	1.00459	0.408322	2.46029	0.0138824	0.0293961
1738	Zm00001d034578	1093.71	1.00476	0.165429	6.07366	1.25029e-09	8.66053e-09
1739	Zm00001d004731	83.0316	1.00578	0.428602	2.34665	0.0189429	0.0386445
1740	Zm00001d030149	4505.91	1.00578	0.106463	9.44722	3.47955e-21	5.99798e-20
1741	Zm00001d047329	1630.6	1.00586	0.159902	6.2905	3.16444e-10	2.33926e-09
1742	Zm00001d032836	304.12	1.00716	0.24817	4.05836	4.94189e-05	0.000179774
1743	Zm00001d050247	61.5198	1.00724	0.435567	2.31248	0.020751	0.0419021
1744	Zm00001d012937	301.475	1.0075	0.254557	3.95784	7.5632e-05	0.000266183
1745	Zm00001d002966	2346.44	1.0081	0.156284	6.45047	1.11501e-10	8.65081e-10
1746	Zm00001d032164	734.456	1.00839	0.163003	6.18632	6.1584e-10	4.40863e-09
1747	Zm00001d005662	1048.11	1.00894	0.138142	7.30366	2.80054e-13	2.81873e-12
1748	Zm00001d048944	1073.13	1.00927	0.149832	6.73603	1.62777e-11	1.37313e-10
1749	Zm00001d017807	529.586	1.00935	0.179493	5.62335	1.8729e-08	1.12444e-07
1750	Zm00001d036196	3905.64	1.00944	0.107549	9.38579	6.24467e-21	1.06108e-19
1751	Zm00001d037620	5875.54	1.00951	0.123632	8.16545	3.20248e-16	4.08962e-15
1752	Zm00001d027936	2512.53	1.00993	0.121878	8.28637	1.16753e-16	1.52822e-15
1753	Zm00001d020773	732.675	1.01007	0.170058	5.93956	2.85791e-09	1.90831e-08
1754	Zm00001d035540	133.957	1.01041	0.3317	3.04614	0.00231801	0.00601055
1755	Zm00001d012052	24012.5	1.01047	0.12571	8.03811	9.12336e-16	1.13184e-14
1756	Zm00001d019474	350.55	1.01104	0.231913	4.35958	1.30315e-05	5.2416e-05
1757	Zm00001d047359	333.28	1.01108	0.257274	3.92999	8.4951e-05	0.000296535
1758	Zm00001d032719	14083.5	1.01126	0.107808	9.3802	6.58456e-21	1.11676e-19
1759	Zm00001d025400	838.589	1.01149	0.156676	6.45592	1.07567e-10	8.36852e-10
1760	Zm00001d018104	3088.17	1.01163	0.131786	7.67633	1.63706e-14	1.83286e-13
1761	Zm00001d022390	16142.4	1.01176	0.104567	9.67568	3.82544e-22	6.96587e-21
1762	Zm00001d004758	1393.95	1.01181	0.17942	5.63932	1.70722e-08	1.03154e-07
1763	Zm00001d037837	598.74	1.01187	0.184548	5.48297	4.18237e-08	2.40194e-07
1764	Zm00001d029840	952.249	1.01253	0.178144	5.68376	1.31763e-08	8.10385e-08
1765	Zm00001d037382	987.164	1.01275	0.170146	5.95222	2.64528e-09	1.77156e-08
1766	Zm00001d002054	454.687	1.01286	0.191103	5.30007	1.1576e-07	6.2843e-07
1767	Zm00001d023456	2262.07	1.01367	0.130969	7.73983	9.95519e-15	1.12912e-13
1768	Zm00001d047259	537.138	1.01376	0.169515	5.98037	2.2263e-09	1.50075e-08
1769	Zm00001d045782	317.18	1.01406	0.222105	4.56569	4.97854e-06	2.1414e-05
1770	Zm00001d040905	85.011	1.0142	0.366682	2.76588	0.00567686	0.0134213
1771	Zm00001d035552	6296.98	1.01421	0.104039	9.74838	1.87443e-22	3.47192e-21
1772	Zm00001d015300	28213.4	1.01435	0.105053	9.65561	4.65377e-22	8.42672e-21
1773	Zm00001d019816	865.327	1.01474	0.204108	4.97158	6.64101e-07	3.25587e-06
1774	Zm00001d026152	101.625	1.01476	0.386144	2.62794	0.0085904	0.0193449
1775	Zm00001d014711	86.2622	1.01544	0.409653	2.47878	0.0131832	0.0281032
1776	Zm00001d015714	5426.77	1.01553	0.126956	7.9991	1.25327e-15	1.53377e-14
1777	Zm00001d010236	3320.77	1.01576	0.152864	6.64489	3.03436e-11	2.49818e-10
1778	Zm00001d046883	820.835	1.01597	0.154158	6.59044	4.38535e-11	3.56374e-10
1779	Zm00001d013652	1099.38	1.01614	0.131967	7.69993	1.36139e-14	1.53485e-13
1780	Zm00001d016274	2936.03	1.01656	0.111578	9.11072	8.18389e-20	1.29613e-18
1781	Zm00001d024883	180.657	1.01663	0.271217	3.74838	0.000177978	0.000583016
1782	Zm00001d047881	1563.76	1.01674	0.135293	7.51511	5.68626e-14	6.08328e-13
1783	Zm00001d039510	1499.52	1.01707	0.131633	7.7266	1.10454e-14	1.24964e-13
1784	Zm00001d044430	174.379	1.01721	0.270805	3.75625	0.000172476	0.000566553
1785	Zm00001d028812	1261.57	1.01746	0.157492	6.46035	1.04464e-10	8.13833e-10
1786	Zm00001d033995	1518.26	1.01805	0.149367	6.81576	9.37698e-12	8.11906e-11
1787	Zm00001d010618	15813	1.01952	0.106741	9.55137	1.27998e-21	2.26157e-20
1788	Zm00001d030345	797.738	1.01984	0.167671	6.08239	1.18408e-09	8.21949e-09
1789	Zm00001d018491	348.822	1.01993	0.211889	4.81352	1.48292e-06	6.91212e-06
1790	Zm00001d051380	330.452	1.02002	0.2005	5.08738	3.63048e-07	1.84843e-06
1791	Zm00001d038625	6463.54	1.02023	0.106635	9.56754	1.09482e-21	1.94658e-20
1792	Zm00001d044415	415.051	1.02028	0.189472	5.38485	7.25064e-08	4.05691e-07
1793	Zm00001d038163	308.751	1.02065	0.221771	4.60229	4.17868e-06	1.82161e-05
1794	Zm00001d037141	80.0572	1.02078	0.404216	2.52533	0.0115591	0.0250044
1795	Zm00001d051442	6214.85	1.02125	0.123071	8.29806	1.05826e-16	1.39068e-15
1796	Zm00001d034011	1265.94	1.02127	0.138015	7.3997	1.36489e-13	1.41209e-12
1797	Zm00001d047275	420.529	1.02164	0.230716	4.42815	9.5044e-06	3.9189e-05
1798	Zm00001d029886	177.612	1.02395	0.328305	3.11889	0.00181535	0.00481143
1799	Zm00001d035658	855.193	1.02501	0.17464	5.86931	4.37618e-09	2.85057e-08
1800	Zm00001d048467	3379.72	1.02503	0.101412	10.1076	5.11448e-24	1.02181e-22
1801	Zm00001d015355	338.984	1.0259	0.194974	5.26175	1.42693e-07	7.67636e-07
1802	Zm00001d042540	16084.9	1.02608	0.0898586	11.4188	3.36761e-30	9.20941e-29
1803	Zm00001d052182	562.188	1.02636	0.166431	6.16689	6.96463e-10	4.95788e-09
1804	Zm00001d027421	463.14	1.0268	0.175102	5.86399	4.51872e-09	2.93665e-08
1805	Zm00001d044088	864.509	1.0281	0.162366	6.33197	2.42051e-10	1.81326e-09
1806	Zm00001d047762	1883.36	1.02832	0.132456	7.76345	8.26503e-15	9.42147e-14
1807	Zm00001d042685	1985.29	1.02852	0.13495	7.62144	2.50855e-14	2.76613e-13
1808	Zm00001d035649	1304.34	1.02915	0.126146	8.15838	3.39544e-16	4.3287e-15
1809	Zm00001d013034	14455.8	1.02923	0.131227	7.84308	4.39612e-15	5.1117e-14
1810	Zm00001d012674	1095.47	1.02944	0.162683	6.32789	2.48541e-10	1.85941e-09
1811	Zm00001d033727	1497.96	1.02985	0.139384	7.38859	1.48397e-13	1.529e-12
1812	Zm00001d026084	9558.18	1.03117	0.122271	8.43351	3.35439e-17	4.5536e-16
1813	Zm00001d023243	3411.25	1.03153	0.127578	8.08547	6.19231e-16	7.78462e-15
1814	ENSRNA049479918	116.511	1.0317	0.382714	2.69575	0.0070231	0.0162092
1815	Zm00001d025247	312.587	1.03221	0.23902	4.3185	1.57095e-05	6.22219e-05
1816	Zm00001d011912	3773.16	1.03449	0.165306	6.25801	3.89926e-10	2.84929e-09
1817	Zm00001d028443	1427.4	1.03452	0.159117	6.50158	7.94782e-11	6.27392e-10
1818	Zm00001d052864	8689.16	1.03482	0.105212	9.83559	7.91042e-23	1.48961e-21
1819	Zm00001d011890	361.705	1.03531	0.223938	4.62319	3.77892e-06	1.6624e-05
1820	Zm00001d043929	2627.41	1.03548	0.144475	7.16718	7.65594e-13	7.34919e-12
1821	Zm00001d031641	1310.6	1.0356	0.126435	8.19077	2.59571e-16	3.32792e-15
1822	Zm00001d005716	517.509	1.03618	0.162251	6.38627	1.69976e-10	1.2926e-09
1823	Zm00001d047701	104.146	1.0371	0.370105	2.80217	0.00507605	0.0121404
1824	Zm00001d012970	594.934	1.03724	0.164685	6.29832	3.00897e-10	2.23044e-09
1825	Zm00001d038571	136.555	1.03749	0.444281	2.3352	0.0195329	0.0396941
1826	Zm00001d031421	55.5929	1.03759	0.451876	2.29618	0.0216658	0.0434892
1827	Zm00001d044083	586.552	1.03774	0.181643	5.71307	1.10953e-08	6.88238e-08
1828	Zm00001d036536	704.505	1.03794	0.147647	7.02993	2.06638e-12	1.89587e-11
1829	Zm00001d017168	4779.01	1.03814	0.109185	9.508	1.94363e-21	3.39438e-20
1830	Zm00001d027429	1759.75	1.03852	0.137882	7.53198	4.99784e-14	5.37732e-13
1831	Zm00001d037307	1177.75	1.03894	0.142864	7.27222	3.53614e-13	3.51995e-12
1832	Zm00001d047186	6412.82	1.03914	0.144091	7.21165	5.52785e-13	5.37712e-12
1833	Zm00001d040527	75.9872	1.04067	0.364569	2.85452	0.00431018	0.0104952
1834	Zm00001d011543	185.105	1.04075	0.30208	3.44528	0.000570467	0.00168583
1835	Zm00001d034516	3113.07	1.04088	0.111926	9.29974	1.4079e-20	2.33097e-19
1836	Zm00001d046069	118.327	1.04156	0.329658	3.15952	0.00158029	0.00424664
1837	Zm00001d034705	333.054	1.04203	0.219501	4.74725	2.062e-06	9.40963e-06
1838	Zm00001d019563	53169.9	1.04261	0.104287	9.99745	1.5637e-23	3.06718e-22
1839	Zm00001d048903	65.3607	1.04303	0.418044	2.49502	0.0125949	0.0269587
1840	Zm00001d037275	13688.8	1.04441	0.120973	8.63342	5.95462e-18	8.44854e-17
1841	Zm00001d026610	1838.51	1.04444	0.114839	9.0948	9.47641e-20	1.49559e-18
1842	Zm00001d014383	667.817	1.04467	0.159501	6.5496	5.7692e-11	4.62681e-10
1843	Zm00001d006631	144.227	1.04482	0.318637	3.27904	0.00104162	0.00291335
1844	Zm00001d023565	2268.98	1.0451	0.131482	7.94861	1.8862e-15	2.27148e-14
1845	Zm00001d012219	724.568	1.04569	0.214919	4.8655	1.14166e-06	5.41978e-06
1846	Zm00001d011903	82.4992	1.04648	0.394674	2.65151	0.00801327	0.018223
1847	Zm00001d025526	1878.64	1.04663	0.13072	8.00666	1.17869e-15	1.44877e-14
1848	Zm00001d053741	2183.17	1.0469	0.178123	5.8774	4.1675e-09	2.72326e-08
1849	Zm00001d018367	680.365	1.04819	0.182655	5.73863	9.54458e-09	5.96629e-08
1850	Zm00001d040075	63.9765	1.04965	0.45726	2.29552	0.0217036	0.0435535
1851	Zm00001d030158	425.464	1.04975	0.236725	4.43446	9.23034e-06	3.81494e-05
1852	Zm00001d049822	931.01	1.04975	0.150451	6.97739	3.00721e-12	2.72166e-11
1853	Zm00001d008345	11139.3	1.05001	0.0979102	10.7242	7.8328e-27	1.81317e-25
1854	Zm00001d002673	763.37	1.05024	0.154734	6.78736	1.14202e-11	9.79446e-11
1855	Zm00001d045784	1998.5	1.05026	0.131125	8.00955	1.15129e-15	1.41662e-14
1856	Zm00001d053144	175.091	1.05039	0.26401	3.97862	6.93171e-05	0.000245525
1857	Zm00001d032366	150.184	1.05099	0.410988	2.55722	0.0105511	0.0231068
1858	Zm00001d032556	3054.08	1.05147	0.147771	7.11554	1.11477e-12	1.054e-11
1859	Zm00001d038969	614.727	1.05177	0.241167	4.36115	1.29378e-05	5.20922e-05
1860	Zm00001d047763	1940.25	1.05199	0.116627	9.02013	1.8787e-19	2.92219e-18
1861	Zm00001d014416	258.454	1.05249	0.231748	4.54152	5.5851e-06	2.38686e-05
1862	Zm00001d046928	289.632	1.05282	0.216178	4.87014	1.11518e-06	5.30407e-06
1863	Zm00001d029226	124.902	1.05296	0.293945	3.58217	0.00034075	0.00105509
1864	Zm00001d032518	260.495	1.05321	0.219429	4.79977	1.5885e-06	7.36781e-06
1865	Zm00001d033671	835.759	1.05352	0.186039	5.66288	1.48857e-08	9.07426e-08
1866	Zm00001d014300	86.7296	1.05388	0.444566	2.37057	0.0177607	0.0364989
1867	Zm00001d044537	382.29	1.05434	0.207155	5.08962	3.58788e-07	1.82921e-06
1868	Zm00001d002239	9139.58	1.05439	0.140451	7.50716	6.04247e-14	6.45215e-13
1869	Zm00001d005089	1699.96	1.05445	0.149571	7.04982	1.79146e-12	1.65437e-11
1870	Zm00001d016322	546.131	1.05464	0.208648	5.05466	4.31153e-07	2.16351e-06
1871	Zm00001d042035	2154.88	1.05653	0.138838	7.60983	2.7446e-14	3.022e-13
1872	Zm00001d046900	4796.64	1.05689	0.13951	7.57579	3.5696e-14	3.88312e-13
1873	Zm00001d004354	255.937	1.05751	0.247923	4.2655	1.99459e-05	7.78154e-05
1874	Zm00001d019593	2818.5	1.05751	0.140957	7.50236	6.26772e-14	6.68006e-13
1875	Zm00001d004358	575.885	1.05777	0.166859	6.33929	2.3083e-10	1.73467e-09
1876	Zm00001d021197	478.365	1.05873	0.191875	5.51781	3.43243e-08	1.99301e-07
1877	Zm00001d045819	4420.97	1.06064	0.112104	9.4613	3.04145e-21	5.26284e-20
1878	Zm00001d023542	3104.87	1.06074	0.123051	8.62032	6.67657e-18	9.44914e-17
1879	Zm00001d029012	235.125	1.06128	0.249211	4.25857	2.05741e-05	8.00043e-05
1880	Zm00001d013119	741.765	1.06208	0.169481	6.26666	3.68864e-10	2.705e-09
1881	Zm00001d038925	878.925	1.06235	0.16151	6.57763	4.7802e-11	3.87349e-10
1882	Zm00001d046596	65746.8	1.06274	0.0955688	11.1201	1.00112e-28	2.5185e-27
1883	Zm00001d045858	576.714	1.06299	0.205127	5.18211	2.1939e-07	1.14961e-06
1884	Zm00001d020402	11955.4	1.06356	0.120158	8.85135	8.64677e-19	1.29937e-17
1885	Zm00001d015470	82.2321	1.06395	0.377772	2.81637	0.00485702	0.0116709
1886	Zm00001d016062	343.353	1.06565	0.242389	4.39643	1.10044e-05	4.48667e-05
1887	Zm00001d005558	5615.83	1.06579	0.111653	9.54556	1.35377e-21	2.3882e-20
1888	Zm00001d012562	1039.09	1.06598	0.132519	8.04399	8.69621e-16	1.08122e-14
1889	Zm00001d015628	363.179	1.06622	0.210249	5.07123	3.9526e-07	1.9958e-06
1890	Zm00001d023249	440.739	1.06627	0.216348	4.92852	8.28552e-07	4.00225e-06
1891	Zm00001d014659	884.613	1.06652	0.15941	6.69045	2.2248e-11	1.85395e-10
1892	Zm00001d046682	10227.8	1.06674	0.105495	10.1118	4.89894e-24	9.80482e-23
1893	Zm00001d041201	468.962	1.06699	0.181392	5.88224	4.04748e-09	2.64943e-08
1894	Zm00001d028774	1383.18	1.06733	0.141818	7.52606	5.2295e-14	5.61321e-13
1895	Zm00001d029442	572.635	1.06734	0.176005	6.06428	1.32548e-09	9.14324e-09
1896	Zm00001d007032	1879.26	1.0674	0.161687	6.60161	4.06705e-11	3.31103e-10
1897	Zm00001d014705	1910.36	1.06741	0.119398	8.93995	3.89352e-19	5.9618e-18
1898	Zm00001d002868	572.908	1.06812	0.168684	6.33205	2.41932e-10	1.81297e-09
1899	Zm00001d014924	4942.11	1.06818	0.111575	9.57369	1.03158e-21	1.83992e-20
1900	Zm00001d027934	3273.49	1.06852	0.110645	9.65719	4.58269e-22	8.30465e-21
1901	Zm00001d016483	78.5773	1.06929	0.376723	2.83841	0.00453396	0.0109798
1902	Zm00001d043264	69.0543	1.06985	0.429122	2.49311	0.0126629	0.0270889
1903	Zm00001d045277	1566	1.0703	0.130977	8.17166	3.04174e-16	3.89094e-15
1904	Zm00001d039856	9704.85	1.07104	0.104753	10.2244	1.54119e-24	3.17156e-23
1905	Zm00001d013310	1060.26	1.0717	0.145597	7.36075	1.82886e-13	1.87156e-12
1906	Zm00001d025435	363.019	1.07195	0.183118	5.85388	4.80238e-09	3.11067e-08
1907	Zm00001d003110	445.278	1.07233	0.212454	5.04734	4.48014e-07	2.24287e-06
1908	Zm00001d012596	319.061	1.07243	0.250544	4.28039	1.86562e-05	7.31139e-05
1909	Zm00001d027286	235.61	1.07262	0.225749	4.75141	2.02005e-06	9.22566e-06
1910	Zm00001d045160	643.298	1.07333	0.179021	5.99557	2.02777e-09	1.371e-08
1911	Zm00001d019650	555.59	1.07375	0.171633	6.25609	3.9474e-10	2.88261e-09
1912	Zm00001d037164	2104.04	1.07491	0.132165	8.13307	4.18555e-16	5.30607e-15
1913	Zm00001d045760	92.5673	1.07548	0.410179	2.62199	0.00874189	0.0196293
1914	Zm00001d043380	237.587	1.07551	0.229756	4.68108	2.85364e-06	1.2757e-05
1915	Zm00001d014180	741.802	1.07585	0.1818	5.91778	3.2632e-09	2.16361e-08
1916	Zm00001d053522	176.827	1.07605	0.247649	4.34504	1.39251e-05	5.56316e-05
1917	Zm00001d042449	105.352	1.07619	0.353834	3.04151	0.00235398	0.00609544
1918	Zm00001d036418	295.387	1.0767	0.206284	5.21951	1.79399e-07	9.55104e-07
1919	Zm00001d004682	109.164	1.07711	0.319348	3.37282	0.00074402	0.00215011
1920	Zm00001d051534	646.131	1.07715	0.151872	7.0925	1.31713e-12	1.23347e-11
1921	Zm00001d018282	2908.3	1.07881	0.108139	9.97621	1.93729e-23	3.78356e-22
1922	Zm00001d021577	108.303	1.07904	0.400313	2.69548	0.00702869	0.0162172
1923	Zm00001d045513	801.374	1.07955	0.158015	6.83193	8.37822e-12	7.29618e-11
1924	Zm00001d031824	649.826	1.08038	0.170427	6.33926	2.3087e-10	1.73467e-09
1925	Zm00001d027731	11632.9	1.08059	0.100469	10.7554	5.58672e-27	1.30123e-25
1926	Zm00001d029563	472.169	1.08134	0.205262	5.26808	1.3786e-07	7.42794e-07
1927	Zm00001d014600	133.722	1.08162	0.300349	3.60121	0.00031674	0.000986558
1928	Zm00001d030062	685.864	1.08187	0.157667	6.86176	6.80162e-12	5.9738e-11
1929	Zm00001d020578	1653.8	1.08195	0.137637	7.8609	3.81388e-15	4.46222e-14
1930	Zm00001d025374	254.079	1.08198	0.268322	4.03238	5.52139e-05	0.000199126
1931	Zm00001d024669	1061.79	1.082	0.127768	8.46845	2.48672e-17	3.39406e-16
1932	Zm00001d043864	4637.59	1.08223	0.12074	8.96333	3.1502e-19	4.84659e-18
1933	Zm00001d035098	1107.53	1.08288	0.131595	8.22882	1.89066e-16	2.44478e-15
1934	Zm00001d001882	10710.4	1.08297	0.112435	9.63197	5.85954e-22	1.05593e-20
1935	Zm00001d009894	72.3315	1.08345	0.370822	2.92174	0.00348087	0.00868144
1936	Zm00001d016748	161.74	1.08355	0.281232	3.85287	0.000116739	0.000397317
1937	Zm00001d017345	2388.83	1.08382	0.109276	9.91827	3.4672e-23	6.69063e-22
1938	Zm00001d013188	54.7718	1.08456	0.429446	2.52548	0.0115539	0.0249956
1939	Zm00001d025835	136.131	1.08467	0.305546	3.54996	0.000385294	0.00118121
1940	Zm00001d040112	80.1989	1.08482	0.466871	2.32359	0.0201476	0.040815
1941	Zm00001d007927	330.7	1.08482	0.249438	4.34905	1.36729e-05	5.47014e-05
1942	Zm00001d001767	2548.48	1.08489	0.11856	9.15056	5.66416e-20	9.05944e-19
1943	Zm00001d026555	1087.03	1.08509	0.146958	7.38363	1.54027e-13	1.58628e-12
1944	Zm00001d012939	230.688	1.08582	0.237233	4.57703	4.71624e-06	2.04061e-05
1945	Zm00001d021627	541.123	1.08614	0.204535	5.3103	1.09445e-07	5.96005e-07
1946	Zm00001d035079	315.622	1.08616	0.199285	5.4503	5.02844e-08	2.86078e-07
1947	Zm00001d037420	1924.48	1.08654	0.122255	8.88749	6.2505e-19	9.44929e-18
1948	Zm00001d042114	144.721	1.08789	0.379992	2.86293	0.00419745	0.0102571
1949	Zm00001d037733	84.1491	1.0885	0.370885	2.93487	0.00333692	0.00835653
1950	Zm00001d039589	12643.7	1.08895	0.145162	7.50164	6.30244e-14	6.71389e-13
1951	Zm00001d047989	3139.67	1.08912	0.147508	7.38347	1.5422e-13	1.58755e-12
1952	Zm00001d010274	1157.28	1.09013	0.13972	7.80229	6.07933e-15	6.99695e-14
1953	Zm00001d013651	401.015	1.09013	0.179711	6.06604	1.311e-09	9.05887e-09
1954	Zm00001d021718	2940.73	1.09044	0.113977	9.56719	1.09851e-21	1.9516e-20
1955	Zm00001d023536	1526.33	1.09124	0.137084	7.96038	1.71514e-15	2.07431e-14
1956	Zm00001d033887	186.362	1.09143	0.241686	4.51591	6.30449e-06	2.67058e-05
1957	Zm00001d002771	88.042	1.09245	0.401229	2.72276	0.00647395	0.0150725
1958	Zm00001d034118	288.683	1.09299	0.235064	4.64975	3.32344e-06	1.47523e-05
1959	Zm00001d013609	1973.99	1.09345	0.127791	8.55656	1.16285e-17	1.62239e-16
1960	Zm00001d028615	69.5776	1.09412	0.455059	2.40435	0.016201	0.0336798
1961	Zm00001d024030	2874.74	1.09429	0.117095	9.34531	9.16214e-21	1.5349e-19
1962	Zm00001d032386	4711.19	1.09534	0.110137	9.94534	2.64283e-23	5.1217e-22
1963	Zm00001d027512	4490.58	1.09603	0.111958	9.78966	1.24717e-22	2.32914e-21
1964	Zm00001d038819	160.593	1.09642	0.308231	3.55715	0.000374904	0.00115186
1965	Zm00001d037799	160.861	1.09654	0.271051	4.04549	5.22145e-05	0.000189153
1966	Zm00001d042578	2197.65	1.09781	0.147914	7.42193	1.15429e-13	1.2019e-12
1967	Zm00001d033456	685.248	1.09858	0.174782	6.2854	3.27011e-10	2.41452e-09
1968	Zm00001d034032	4357.57	1.09961	0.121104	9.07989	1.08681e-19	1.71166e-18
1969	Zm00001d021046	2231.82	1.10047	0.119098	9.24007	2.46345e-20	4.02263e-19
1970	Zm00001d051405	2529.28	1.10077	0.133348	8.25481	1.52146e-16	1.97754e-15
1971	Zm00001d044693	461.034	1.10114	0.216297	5.09085	3.56466e-07	1.81819e-06
1972	Zm00001d018862	405.673	1.10182	0.237919	4.63109	3.63743e-06	1.60453e-05
1973	Zm00001d038270	2993.97	1.10237	0.124985	8.81999	1.14467e-18	1.7054e-17
1974	Zm00001d029202	231.453	1.10256	0.235051	4.6907	2.72269e-06	1.22149e-05
1975	Zm00001d014987	57.5115	1.10351	0.4106	2.68756	0.00719765	0.0165501
1976	Zm00001d052493	17962.9	1.10365	0.0947351	11.6499	2.2973e-31	6.59338e-30
1977	Zm00001d035331	222.357	1.10389	0.250854	4.40052	1.07992e-05	4.40776e-05
1978	Zm00001d043680	406.47	1.10508	0.203608	5.42749	5.71525e-08	3.22979e-07
1979	Zm00001d044608	461.648	1.10515	0.184886	5.97747	2.2663e-09	1.52635e-08
1980	Zm00001d046658	261.167	1.10518	0.216623	5.10183	3.3639e-07	1.72278e-06
1981	Zm00001d004435	209.318	1.10545	0.262651	4.20881	2.56724e-05	9.84246e-05
1982	Zm00001d012886	7728.73	1.10558	0.146678	7.53742	4.79378e-14	5.1676e-13
1983	Zm00001d015433	784.742	1.10649	0.173689	6.37051	1.88395e-10	1.42595e-09
1984	Zm00001d051592	128.827	1.10793	0.2919	3.79559	0.000147291	0.000490235
1985	Zm00001d043529	770.26	1.10891	0.22146	5.00729	5.52025e-07	2.73305e-06
1986	Zm00001d027616	107.657	1.10921	0.336106	3.30017	0.000966256	0.00272344
1987	Zm00001d028404	70.3254	1.10997	0.385403	2.88003	0.00397642	0.00977188
1988	Zm00001d030888	2341.86	1.11005	0.113456	9.78398	1.31916e-22	2.46156e-21
1989	Zm00001d045454	80.7259	1.11095	0.399353	2.78187	0.00540473	0.012841
1990	Zm00001d030018	1763.59	1.11181	0.125642	8.84899	8.8316e-19	1.32627e-17
1991	Zm00001d007153	2815.88	1.11224	0.130191	8.54312	1.3065e-17	1.81945e-16
1992	Zm00001d044606	471.14	1.11303	0.189455	5.87491	4.2307e-09	2.76137e-08
1993	Zm00001d051249	585.79	1.11329	0.176559	6.30549	2.8729e-10	2.13518e-09
1994	Zm00001d049831	410.676	1.11403	0.267036	4.17183	3.02162e-05	0.000114544
1995	Zm00001d043903	718.455	1.11456	0.183741	6.06592	1.31203e-09	9.06321e-09
1996	Zm00001d015037	744.317	1.11509	0.167005	6.67694	2.43984e-11	2.02345e-10
1997	Zm00001d027456	167.34	1.1151	0.291428	3.82633	0.000130066	0.000438515
1998	Zm00001d034017	295.867	1.11517	0.216213	5.15775	2.49935e-07	1.29913e-06
[truncated: 1,777 more rows]

## Sheet: D_V8 versus P_V8
Supplemental Dataset 2. List of line-specific differentially expressed genes (D_V8 versus P_V8)
	gene_ID	baseMean	log2FoldChange	lfcSE	stat	pvalue	padj
1	Zm00001d033657	8269.9	-9.82941	0.372946	-26.3562	4.36228e-153	2.43328e-149
2	Zm00001d029307	6542.78	-9.35879	0.344212	-27.189	8.75381e-163	6.5105e-159
3	Zm00001d051591	12132.6	-9.33331	0.404813	-23.0558	1.28516e-117	2.38954e-114
4	Zm00001d005779	9144.11	-8.38406	0.40043	-20.9377	2.43107e-97	2.26008e-94
5	Zm00001d048839	3532.95	-7.93019	0.263116	-30.1395	1.47096e-199	3.282e-195
6	Zm00001d052245	1991.19	-7.54916	0.332398	-22.7112	3.47233e-114	5.16497e-111
7	Zm00001d024262	1572.75	-7.15328	0.364612	-19.6189	1.06665e-85	6.61088e-83
8	Zm00001d011604	9808.44	-7.06917	0.326147	-21.6748	3.54541e-104	4.16343e-101
9	Zm00001d042692	11137.9	-7.04173	0.272457	-25.8453	2.75083e-147	1.22753e-143
10	Zm00001d049480	2104.59	-6.68309	0.280016	-23.8668	6.77782e-126	1.6803e-122
11	Zm00001d018257	5581.01	-6.63843	0.360489	-18.4151	9.93951e-76	4.92823e-73
12	Zm00001d014863	1591.99	-6.63126	0.285653	-23.2144	3.25767e-119	7.2685e-116
13	Zm00001d021382	1465.82	-6.61588	0.401807	-16.4653	6.51207e-61	1.99037e-58
14	Zm00001d049244	1738.49	-6.40344	0.309696	-20.6765	5.6368e-95	4.83724e-92
15	Zm00001d015097	2459.34	-6.37229	0.347106	-18.3583	2.83313e-75	1.37419e-72
16	Zm00001d032540	742.909	-6.36002	0.396515	-16.0398	6.73998e-58	1.92798e-55
17	Zm00001d042278	1661.43	-6.27055	0.352688	-17.7793	1.02235e-70	4.47267e-68
18	Zm00001d009351	1100.24	-6.15675	0.489366	-12.5811	2.6841e-36	3.48184e-34
19	Zm00001d024885	3462.94	-6.1244	0.345078	-17.7479	1.78983e-70	7.53486e-68
20	Zm00001d018857	1500.64	-6.05618	0.383473	-15.793	3.47891e-56	9.13192e-54
21	Zm00001d005715	570.077	-5.92704	0.39719	-14.9224	2.35641e-50	5.25763e-48
22	Zm00001d010220	2354.74	-5.90001	0.314869	-18.738	2.42798e-78	1.3213e-75
23	Zm00001d007487	697.075	-5.84225	0.419142	-13.9386	3.69201e-44	6.69725e-42
24	Zm00001d012420	38068	-5.82179	0.463776	-12.553	3.82644e-36	4.8786e-34
25	Zm00001d053082	1430.54	-5.73435	0.325312	-17.6272	1.52227e-69	6.17542e-67
26	Zm00001d031188	384.461	-5.67592	0.343188	-16.5388	1.92785e-61	6.05833e-59
27	Zm00001d046471	405.412	-5.66205	0.352212	-16.0757	3.77744e-58	1.09457e-55
28	Zm00001d014114	2051.65	-5.64239	0.334826	-16.8517	1.019e-63	3.49783e-61
29	Zm00001d052194	15131.5	-5.61815	0.385798	-14.5624	4.87036e-48	9.9695e-46
30	Zm00001d002305	828.257	-5.55372	0.321606	-17.2687	8.09598e-67	3.01062e-64
31	Zm00001d026371	1711.28	-5.51829	0.416339	-13.2543	4.25999e-40	6.78921e-38
32	Zm00001d048693	1625.76	-5.51137	0.277471	-19.8629	8.53041e-88	5.59796e-85
33	Zm00001d010577	759.605	-5.4696	0.367617	-14.8785	4.54344e-50	9.93856e-48
34	Zm00001d028733	853.486	-5.3298	0.263507	-20.2265	5.72727e-91	4.25956e-88
35	Zm00001d052902	753.208	-5.28528	0.360508	-14.6606	1.15181e-48	2.44754e-46
36	Zm00001d014178	1869.86	-5.25615	0.269455	-19.5066	9.64628e-85	5.81697e-82
37	Zm00001d034421	9853.13	-5.20589	0.31349	-16.6063	6.27937e-62	2.03051e-59
38	Zm00001d029722	2798.43	-5.15514	0.307524	-16.7634	4.52162e-63	1.50577e-60
39	Zm00001d044874	354.938	-5.13167	0.497918	-10.3063	6.60199e-25	4.8776e-23
40	Zm00001d006300	467.632	-5.11987	0.351763	-14.5549	5.43645e-48	1.10271e-45
41	Zm00001d038164	1539.03	-5.08914	0.253486	-20.0766	1.18283e-89	8.51329e-87
42	Zm00001d038806	13781.9	-5.08873	0.292041	-17.4247	5.35697e-68	2.06077e-65
43	Zm00001d039566	37176.7	-5.08808	1.05141	-4.83928	1.30309e-06	1.638e-05
44	Zm00001d037731	1259.02	-5.05778	0.341537	-14.8089	1.28342e-49	2.75343e-47
45	Zm00001d015046	361.522	-5.00449	0.401213	-12.4734	1.04297e-35	1.30004e-33
46	Zm00001d053634	549.011	-5.00347	0.415084	-12.0541	1.84505e-33	2.08968e-31
47	Zm00001d006386	566.545	-4.98379	0.381048	-13.0792	4.33096e-39	6.57363e-37
48	Zm00001d044898	425.835	-4.9687	0.464612	-10.6943	1.08218e-26	8.74839e-25
49	Zm00001d025484	348.444	-4.9641	0.434961	-11.4127	3.61141e-30	3.71326e-28
50	Zm00001d013055	398.138	-4.96143	0.324535	-15.2878	9.21888e-53	2.16518e-50
51	Zm00001d039133	2286.29	-4.95871	0.300467	-16.5033	3.47134e-61	1.07573e-58
52	Zm00001d034434	722.627	-4.93641	0.408999	-12.0695	1.53065e-33	1.74244e-31
53	Zm00001d032879	376.369	-4.92694	0.38143	-12.917	3.60837e-38	5.16089e-36
54	Zm00001d015747	2337.48	-4.91837	0.309938	-15.8689	1.04056e-56	2.8663e-54
55	Zm00001d040534	1968.2	-4.87161	0.292922	-16.6311	4.14996e-62	1.36167e-59
56	Zm00001d025354	11389.2	-4.84849	0.21814	-22.2265	1.90396e-109	2.49889e-106
57	Zm00001d034460	3371.61	-4.82812	0.232878	-20.7324	1.76895e-95	1.57875e-92
58	Zm00001d042922	11741.8	-4.82488	0.458356	-10.5265	6.52263e-26	5.05323e-24
59	Zm00001d028557	9009.22	-4.82297	0.423779	-11.3809	5.20801e-30	5.30599e-28
60	Zm00001d038250	2075.21	-4.81067	0.257239	-18.7012	4.84389e-78	2.57326e-75
61	Zm00001d002113	653.267	-4.75116	0.484744	-9.80138	1.11055e-22	7.21261e-21
62	Zm00001d011294	407.52	-4.74902	0.397997	-11.9323	8.03006e-33	9.00335e-31
63	Zm00001d004018	259.884	-4.73296	0.44948	-10.5299	6.29327e-26	4.89546e-24
64	Zm00001d019111	491.501	-4.70814	0.460013	-10.2348	1.3848e-24	9.99927e-23
65	Zm00001d047607	362.276	-4.63913	0.321888	-14.4123	4.33338e-47	8.48127e-45
66	Zm00001d027011	2681.21	-4.61511	0.318848	-14.4743	1.7601e-47	3.50637e-45
67	Zm00001d049543	9093.38	-4.58591	0.279976	-16.3797	2.67267e-60	7.95101e-58
68	Zm00001d011666	1002.89	-4.57665	0.350459	-13.059	5.64443e-39	8.45226e-37
69	Zm00001d011075	1631.56	-4.53177	0.343436	-13.1954	9.32849e-40	1.4555e-37
70	Zm00001d007027	774.386	-4.49838	0.365338	-12.3129	7.71845e-35	9.30887e-33
71	Zm00001d046975	718.73	-4.4937	0.411718	-10.9145	9.82659e-28	8.4981e-26
72	Zm00001d026094	1191.93	-4.48713	0.25552	-17.5608	4.9209e-69	1.96063e-66
73	Zm00001d024713	3728.15	-4.47635	0.348474	-12.8456	9.10698e-38	1.28604e-35
74	Zm00001d049771	4702.28	-4.45311	0.342845	-12.9887	1.41827e-38	2.08187e-36
75	Zm00001d033607	360.257	-4.44111	0.307174	-14.458	2.23345e-47	4.40998e-45
76	Zm00001d043096	503.025	-4.43192	0.332623	-13.3241	1.67553e-40	2.70902e-38
77	Zm00001d037680	1478	-4.43011	0.916338	-4.83458	1.33426e-06	1.66965e-05
78	Zm00001d044826	1300.22	-4.37167	0.249792	-17.5012	1.40278e-68	5.49101e-66
79	Zm00001d012555	241.366	-4.35214	0.416283	-10.4548	1.39342e-25	1.0539e-23
80	Zm00001d010428	12836.8	-4.35134	0.377631	-11.5227	1.0134e-30	1.07672e-28
81	Zm00001d041973	1832.57	-4.29971	0.307085	-14.0017	1.52167e-44	2.80592e-42
82	Zm00001d037665	267.716	-4.29201	0.429422	-9.99485	1.60535e-23	1.10894e-21
83	Zm00001d045036	944.572	-4.27568	0.314676	-13.5876	4.74394e-42	8.14205e-40
84	Zm00001d020071	317.154	-4.27308	0.341893	-12.4983	7.62702e-36	9.61435e-34
85	Zm00001d014204	740.703	-4.23871	0.370776	-11.432	2.89436e-30	3.00367e-28
86	Zm00001d029087	1543.45	-4.22081	0.27227	-15.5023	3.34779e-54	8.29955e-52
87	Zm00001d022468	582.02	-4.21199	0.443682	-9.49326	2.23913e-21	1.32871e-19
88	Zm00001d053092	8025.74	-4.20766	0.386188	-10.8953	1.21301e-27	1.04497e-25
89	Zm00001d039685	456.324	-4.19521	0.467593	-8.97194	2.91336e-19	1.49089e-17
90	Zm00001d049989	2109.98	-4.18105	0.381827	-10.9501	6.63696e-28	5.97113e-26
91	Zm00001d010529	11858.9	-4.17898	0.390352	-10.7057	9.57148e-27	7.79412e-25
92	Zm00001d000496	130.897	-4.15961	0.390812	-10.6435	1.86993e-26	1.49007e-24
93	Zm00001d051072	286.57	-4.15254	0.400054	-10.3799	3.05982e-25	2.29096e-23
94	Zm00001d009588	291.432	-4.14294	0.393417	-10.5307	6.23936e-26	4.88465e-24
95	Zm00001d006458	171.186	-4.14061	0.427679	-9.68158	3.61078e-22	2.26302e-20
96	Zm00001d044183	334.884	-4.13841	0.393019	-10.5298	6.29705e-26	4.89546e-24
97	Zm00001d008222	344.127	-4.13737	0.318923	-12.9729	1.74216e-38	2.54059e-36
98	Zm00001d006913	249.973	-4.13023	0.380902	-10.8433	2.14609e-27	1.81377e-25
99	Zm00001d002164	2461.2	-4.12445	0.414369	-9.95358	2.43282e-23	1.66507e-21
100	Zm00001d028554	7142.87	-4.10895	0.471426	-8.71602	2.88164e-18	1.4069e-16
101	Zm00001d007789	134.508	-4.06405	0.386196	-10.5233	6.7474e-26	5.20927e-24
102	Zm00001d019226	944.219	-4.06221	0.279207	-14.5491	5.92028e-48	1.19003e-45
103	Zm00001d017567	134.461	-4.03352	0.465949	-8.65656	4.86216e-18	2.333e-16
104	Zm00001d004855	1370.12	-4.00857	0.264295	-15.1671	5.84419e-52	1.33057e-49
105	Zm00001d048476	216.772	-4.00698	0.490301	-8.17249	3.02101e-16	1.24823e-14
106	Zm00001d034722	295.805	-3.99115	0.367283	-10.8667	1.66113e-27	1.42005e-25
107	Zm00001d042258	2086.45	-3.98571	0.231147	-17.2432	1.25921e-66	4.60582e-64
108	Zm00001d044915	580.332	-3.98311	0.427885	-9.30884	1.29242e-20	7.28194e-19
109	Zm00001d024083	653.678	-3.98124	0.316944	-12.5613	3.44466e-36	4.41708e-34
110	Zm00001d047973	4192.23	-3.97762	0.185294	-21.4665	3.20001e-102	3.10429e-99
111	Zm00001d023553	143.96	-3.95366	0.452982	-8.72808	2.5904e-18	1.26748e-16
112	Zm00001d017706	389.012	-3.94676	0.370061	-10.6652	1.48154e-26	1.19336e-24
113	Zm00001d033872	736.907	-3.93954	0.239938	-16.419	1.39892e-60	4.21794e-58
114	Zm00001d039824	516.116	-3.91755	0.397689	-9.85079	6.80065e-23	4.51595e-21
115	Zm00001d011446	885.305	-3.89326	0.276406	-14.0853	4.6781e-45	8.69815e-43
116	Zm00001d015310	301.725	-3.88859	0.421182	-9.23258	2.64199e-20	1.46273e-18
117	Zm00001d036676	356.092	-3.8825	0.361921	-10.7275	7.56291e-27	6.20381e-25
118	Zm00001d026442	194.815	-3.87843	0.511035	-7.58936	3.21496e-14	1.10869e-12
119	Zm00001d042460	296.561	-3.87048	0.318061	-12.169	4.54614e-34	5.31065e-32
120	Zm00001d020428	292.646	-3.84471	0.392104	-9.80531	1.06814e-22	6.98897e-21
121	Zm00001d013057	519.101	-3.84264	0.392051	-9.80138	1.11057e-22	7.21261e-21
122	Zm00001d002817	959.832	-3.83536	0.220271	-17.412	6.69601e-68	2.53223e-65
123	Zm00001d047847	6210.11	-3.82701	0.247119	-15.4865	4.27898e-54	1.03775e-51
124	Zm00001d018298	6394.97	-3.81521	0.354979	-10.7477	6.074e-27	5.01937e-25
125	Zm00001d025389	433.014	-3.8116	0.297539	-12.8105	1.43297e-37	1.98023e-35
126	Zm00001d036341	160.599	-3.8068	0.476807	-7.98394	1.41738e-15	5.59725e-14
127	Zm00001d052394	316.417	-3.79706	0.340445	-11.1532	6.90714e-29	6.55796e-27
128	Zm00001d052934	387.942	-3.79253	0.447218	-8.48026	2.24695e-17	1.02314e-15
129	Zm00001d048962	373.079	-3.74399	0.43759	-8.55594	1.16913e-17	5.4687e-16
130	Zm00001d018435	195.94	-3.73984	0.378611	-9.87779	5.19676e-23	3.48199e-21
131	Zm00001d052851	765.739	-3.72421	0.399788	-9.31546	1.21423e-20	6.85871e-19
132	Zm00001d020667	565.254	-3.72348	0.330224	-11.2756	1.73128e-29	1.70168e-27
133	Zm00001d041951	238.748	-3.70272	0.425144	-8.70933	3.05672e-18	1.48587e-16
134	Zm00001d001838	471.333	-3.67534	0.335923	-10.941	7.33745e-28	6.49655e-26
135	Zm00001d051709	452.541	-3.65874	0.334618	-10.9341	7.92067e-28	6.93043e-26
136	Zm00001d000383	302.533	-3.64775	0.410084	-8.89513	5.83528e-19	2.96576e-17
137	Zm00001d051546	243.862	-3.64264	0.334833	-10.879	1.45193e-27	1.24598e-25
138	Zm00001d042861	1745.1	-3.63894	0.227613	-15.9874	1.5635e-57	4.41579e-55
139	Zm00001d015328	6098.7	-3.63477	0.263852	-13.7758	3.56381e-43	6.41256e-41
140	Zm00001d020954	4216.26	-3.63162	0.204155	-17.7885	8.67179e-71	3.8697e-68
141	Zm00001d033044	5845.88	-3.62588	0.457416	-7.92688	2.24729e-15	8.72027e-14
142	Zm00001d008891	179.944	-3.62007	0.484547	-7.47103	7.95696e-14	2.6657e-12
143	Zm00001d028408	794.181	-3.61844	0.518922	-6.97299	3.10268e-12	8.70779e-11
144	Zm00001d029566	207.255	-3.61349	0.352001	-10.2656	1.0073e-24	7.34472e-23
145	Zm00001d008951	267.021	-3.61061	0.365166	-9.88758	4.71272e-23	3.17674e-21
146	Zm00001d039231	465.142	-3.6049	0.360893	-9.98884	1.70562e-23	1.17456e-21
147	Zm00001d013844	139.029	-3.58869	0.525735	-6.82604	8.72919e-12	2.36653e-10
148	Zm00001d021009	829.768	-3.58426	0.341507	-10.4954	9.0685e-26	6.95314e-24
149	Zm00001d048135	982.707	-3.57737	0.266954	-13.4007	5.99026e-41	9.90035e-39
150	Zm00001d015857	177.593	-3.56678	0.407298	-8.75717	2.00205e-18	9.88267e-17
151	Zm00001d002758	321.727	-3.54819	0.393703	-9.01235	2.01689e-19	1.04653e-17
152	Zm00001d013448	271.363	-3.53132	0.345469	-10.2218	1.58357e-24	1.1361e-22
153	Zm00001d023724	690.848	-3.51847	0.321392	-10.9476	6.82186e-28	6.11282e-26
154	Zm00001d047044	10812.4	-3.51071	0.347662	-10.0981	5.6345e-24	3.96583e-22
155	Zm00001d041148	155.869	-3.50766	0.472899	-7.41737	1.19473e-13	3.93169e-12
156	Zm00001d028434	296.083	-3.50193	0.434993	-8.05054	8.24308e-16	3.34399e-14
157	Zm00001d014730	353.947	-3.4848	0.499579	-6.97548	3.04833e-12	8.56603e-11
158	Zm00001d015175	188.589	-3.47677	0.363748	-9.55818	1.19847e-21	7.24669e-20
159	Zm00001d017107	401.731	-3.47532	0.300966	-11.5472	7.62551e-31	8.14069e-29
160	Zm00001d032451	106.036	-3.47401	0.517417	-6.71414	1.89174e-11	4.90797e-10
161	Zm00001d052738	1131.61	-3.47001	0.262275	-13.2304	5.85792e-40	9.20435e-38
162	Zm00001d008283	1133.59	-3.46238	0.372064	-9.30588	1.32891e-20	7.44993e-19
163	Zm00001d021185	85.101	-3.45348	0.453292	-7.61866	2.5632e-14	8.94992e-13
164	Zm00001d013294	1788.75	-3.45039	0.284161	-12.1424	6.29635e-34	7.31688e-32
165	Zm00001d026062	610.282	-3.4411	0.312073	-11.0266	2.84547e-28	2.62347e-26
166	Zm00001d032376	3044.43	-3.43707	0.344592	-9.97431	1.97466e-23	1.35565e-21
167	Zm00001d023601	415.665	-3.43002	0.309297	-11.0897	1.40764e-28	1.31963e-26
168	Zm00001d037507	5245.34	-3.42237	0.276086	-12.396	2.74613e-35	3.38517e-33
169	Zm00001d019243	2408.04	-3.41742	0.384799	-8.88105	6.623e-19	3.35085e-17
170	Zm00001d028230	169.37	-3.39781	0.436362	-7.78668	6.87946e-15	2.52044e-13
171	Zm00001d016194	900.601	-3.37751	0.519543	-6.50093	7.98249e-11	1.91305e-09
172	Zm00001d022032	197.59	-3.37651	0.625525	-5.39788	6.74324e-08	1.06254e-06
173	Zm00001d002506	176.794	-3.36037	0.453389	-7.41166	1.24728e-13	4.08056e-12
174	Zm00001d028567	450.417	-3.35945	0.246695	-13.6178	3.13708e-42	5.42594e-40
175	Zm00001d019250	336.62	-3.35208	0.457819	-7.32184	2.44588e-13	7.77386e-12
176	Zm00001d031332	53775.7	-3.34378	0.271701	-12.3068	8.3225e-35	9.98342e-33
177	Zm00001d047301	140.032	-3.32202	0.501403	-6.62545	3.46192e-11	8.76758e-10
178	Zm00001d033797	617.304	-3.3185	0.25592	-12.967	1.88355e-38	2.72894e-36
179	Zm00001d048073	810.942	-3.30516	0.374115	-8.83462	1.00443e-18	5.03616e-17
180	Zm00001d025126	893.916	-3.29535	0.339618	-9.7031	2.92463e-22	1.84856e-20
181	Zm00001d025346	440.261	-3.28182	0.442687	-7.41342	1.23085e-13	4.03269e-12
182	Zm00001d030270	349.423	-3.27355	0.605749	-5.40413	6.5123e-08	1.02968e-06
183	Zm00001d012323	191.086	-3.27083	0.414817	-7.885	3.14523e-15	1.20371e-13
184	Zm00001d029378	7283.35	-3.26111	0.209748	-15.5477	1.64896e-54	4.13389e-52
185	Zm00001d051139	3503.22	-3.25805	0.255126	-12.7704	2.4004e-37	3.26572e-35
186	Zm00001d017178	296.842	-3.24916	0.285686	-11.3732	5.68703e-30	5.71573e-28
187	Zm00001d044079	946.237	-3.24852	0.416197	-7.80526	5.93804e-15	2.20816e-13
188	Zm00001d006056	1761.59	-3.2254	0.465117	-6.9346	4.07365e-12	1.1319e-10
189	Zm00001d007319	1569.42	-3.2127	0.388728	-8.26467	1.40086e-16	5.98775e-15
190	Zm00001d039914	9926.22	-3.1972	0.428935	-7.45381	9.06826e-14	3.01536e-12
191	Zm00001d026224	1256.13	-3.18654	0.355001	-8.97615	2.80408e-19	1.43827e-17
192	Zm00001d008437	78.43	-3.18589	0.518156	-6.14851	7.82144e-10	1.65258e-08
193	Zm00001d013489	1272.54	-3.17337	0.250785	-12.6538	1.06621e-36	1.39937e-34
194	Zm00001d030368	744.826	-3.1699	0.294295	-10.7712	4.70853e-27	3.90546e-25
195	Zm00001d025960	504.085	-3.16952	0.348667	-9.0904	9.86725e-20	5.25437e-18
196	Zm00001d035115	591.267	-3.16572	0.271494	-11.6604	2.0313e-31	2.18949e-29
197	Zm00001d007091	386.798	-3.16044	0.359344	-8.79502	1.43028e-18	7.12841e-17
198	Zm00001d051532	307.8	-3.14789	0.436422	-7.21294	5.47559e-13	1.66673e-11
199	Zm00001d042257	634.93	-3.14715	0.346275	-9.08858	1.00339e-19	5.33038e-18
200	Zm00001d021263	8381.43	-3.14628	0.195129	-16.1241	1.72742e-58	5.07135e-56
201	Zm00001d038528	263.759	-3.14431	0.321533	-9.7791	1.38438e-22	8.92727e-21
202	Zm00001d031201	643.244	-3.13284	0.343081	-9.13149	6.75653e-20	3.65016e-18
203	Zm00001d036680	231.344	-3.12306	0.437094	-7.14506	8.99535e-13	2.6654e-11
204	Zm00001d007341	291.285	-3.11351	0.387576	-8.03327	9.49089e-16	3.81551e-14
205	Zm00001d046754	2932.66	-3.1095	0.412446	-7.53917	4.72987e-14	1.61119e-12
206	Zm00001d032598	1306.15	-3.10091	0.389212	-7.96713	1.62398e-15	6.35687e-14
207	Zm00001d013759	630.366	-3.0865	0.336644	-9.16844	4.79924e-20	2.61172e-18
208	Zm00001d026440	71.5843	-3.08346	0.439268	-7.01955	2.22589e-12	6.35091e-11
209	Zm00001d034555	2731.08	-3.07038	0.368584	-8.3302	8.07075e-17	3.52396e-15
210	Zm00001d020976	1075.17	-3.06147	0.232415	-13.1724	1.26456e-39	1.95937e-37
211	Zm00001d042880	1331.93	-3.05638	0.202352	-15.1043	1.5166e-51	3.41801e-49
212	Zm00001d025509	2797.48	-3.05059	0.335379	-9.09595	9.37613e-20	5.00479e-18
213	Zm00001d033446	145.627	-3.04507	0.411931	-7.39219	1.44427e-13	4.7043e-12
214	Zm00001d034175	877.992	-3.03713	0.255142	-11.9037	1.13262e-32	1.26355e-30
215	Zm00001d038310	6886.54	-3.03512	0.24048	-12.6211	1.61573e-36	2.1082e-34
216	Zm00001d032035	234.286	-3.032	0.372566	-8.13815	4.01363e-16	1.64316e-14
217	Zm00001d031412	422.22	-3.03065	0.288442	-10.507	8.02446e-26	6.17385e-24
218	Zm00001d032192	168.176	-3.03015	0.406272	-7.45842	8.75673e-14	2.91612e-12
219	Zm00001d031175	189.007	-3.02951	0.544294	-5.56594	2.60747e-08	4.46492e-07
220	Zm00001d050484	4636.26	-3.02909	0.197527	-15.335	4.45957e-53	1.05853e-50
221	Zm00001d029340	387.195	-3.02652	0.316081	-9.57514	1.01724e-21	6.18438e-20
222	Zm00001d016070	7819.39	-3.02486	0.329647	-9.17606	4.47172e-20	2.44542e-18
223	Zm00001d043340	83.9209	-3.01959	0.484876	-6.22755	4.73794e-10	1.03135e-08
224	Zm00001d022355	650.071	-3.01015	0.347317	-8.66686	4.44181e-18	2.1359e-16
225	Zm00001d038833	225.612	-3.00887	0.581073	-5.17812	2.24129e-07	3.23047e-06
226	Zm00001d014460	1543.57	-3.00446	0.289831	-10.3663	3.53107e-25	2.62618e-23
227	Zm00001d039102	494.027	-2.99106	0.260034	-11.5026	1.28035e-30	1.34751e-28
228	Zm00001d005173	2362.75	-2.99022	0.23452	-12.7504	3.10225e-37	4.16972e-35
229	Zm00001d015481	122.736	-2.98131	0.421212	-7.07791	1.46341e-12	4.26819e-11
230	Zm00001d029289	150.975	-2.97424	0.346372	-8.58685	8.93893e-18	4.23451e-16
231	Zm00001d044640	85.8725	-2.96529	0.583952	-5.07797	3.81489e-07	5.25419e-06
232	Zm00001d047187	5370.65	-2.96232	0.289164	-10.2444	1.25387e-24	9.08319e-23
233	Zm00001d002195	99.025	-2.95912	0.494618	-5.98264	2.1955e-09	4.39337e-08
234	Zm00001d038058	327.612	-2.95204	0.337566	-8.74507	2.22886e-18	1.09538e-16
235	Zm00001d006855	1132.34	-2.91438	0.31009	-9.39852	5.53378e-21	3.19043e-19
236	Zm00001d017290	389.903	-2.91406	0.317641	-9.17405	4.5558e-20	2.4853e-18
237	Zm00001d027447	1181.12	-2.91133	0.273033	-10.6629	1.51762e-26	1.21803e-24
238	Zm00001d038875	998.218	-2.90575	0.229205	-12.6775	7.87688e-37	1.04612e-34
239	Zm00001d022618	204.216	-2.90549	0.451285	-6.43825	1.20855e-10	2.82062e-09
240	Zm00001d043202	104.553	-2.90472	0.486737	-5.96774	2.40558e-09	4.7752e-08
241	Zm00001d012398	1873.68	-2.90007	0.236472	-12.2639	1.41534e-34	1.68873e-32
242	Zm00001d046302	589.413	-2.89198	0.357314	-8.09366	5.78987e-16	2.36167e-14
243	Zm00001d019538	222.161	-2.89109	0.366942	-7.87886	3.30384e-15	1.26009e-13
244	Zm00001d014486	5104.81	-2.88964	0.370636	-7.79645	6.36713e-15	2.35204e-13
245	Zm00001d014135	450.597	-2.88073	0.255843	-11.2598	2.07269e-29	2.01947e-27
246	Zm00001d037529	134.76	-2.87293	0.448578	-6.40452	1.50841e-10	3.49851e-09
247	Zm00001d032036	242.296	-2.87203	0.536808	-5.3502	8.7857e-08	1.35734e-06
248	Zm00001d029304	1370.68	-2.8624	0.235004	-12.1802	3.96206e-34	4.65271e-32
249	Zm00001d041650	170.11	-2.85549	0.463548	-6.16007	7.27133e-10	1.54512e-08
250	Zm00001d007072	379.996	-2.8553	0.430108	-6.63856	3.16768e-11	8.05898e-10
251	Zm00001d051500	290.803	-2.85305	0.397992	-7.16861	7.57646e-13	2.26907e-11
252	Zm00001d040725	3406.15	-2.84567	0.300181	-9.47987	2.5461e-21	1.50287e-19
253	Zm00001d001492	107.887	-2.84406	0.497985	-5.71115	1.12217e-08	2.01919e-07
254	Zm00001d002823	7282.66	-2.8392	0.406525	-6.98407	2.86755e-12	8.09884e-11
255	Zm00001d024894	887.178	-2.83444	0.363713	-7.79308	6.53952e-15	2.40775e-13
256	Zm00001d030106	5604	-2.82752	0.312974	-9.03436	1.64972e-19	8.62027e-18
257	Zm00001d026173	183.758	-2.82389	0.505558	-5.58569	2.32776e-08	4.01988e-07
258	Zm00001d047204	6239.48	-2.81758	0.197177	-14.2896	2.54149e-46	4.93094e-44
259	Zm00001d032923	11078.4	-2.81571	0.326469	-8.62472	6.42476e-18	3.06958e-16
260	Zm00001d015307	83.622	-2.81218	0.456285	-6.16322	7.12826e-10	1.52051e-08
261	Zm00001d010396	159.873	-2.81122	0.439339	-6.39873	1.56671e-10	3.61492e-09
262	Zm00001d037562	582.833	-2.81026	0.367947	-7.63768	2.21166e-14	7.77112e-13
263	Zm00001d003346	108.838	-2.80664	0.447995	-6.26488	3.73111e-10	8.22614e-09
264	Zm00001d043512	133.137	-2.80305	0.477174	-5.87426	4.24728e-09	8.03095e-08
265	Zm00001d049347	100.235	-2.79521	0.457489	-6.1099	9.96928e-10	2.08272e-08
266	Zm00001d013338	164.775	-2.79493	0.386934	-7.22327	5.07513e-13	1.55331e-11
267	Zm00001d014155	147.111	-2.79469	0.430674	-6.48911	8.63433e-11	2.06262e-09
268	Zm00001d031068	229.18	-2.78556	0.32138	-8.66749	4.41769e-18	2.13349e-16
269	Zm00001d010970	1725.21	-2.7732	0.284253	-9.75608	1.73736e-22	1.11712e-20
270	Zm00001d009034	164.448	-2.76922	0.531619	-5.20903	1.89829e-07	2.77371e-06
271	Zm00001d053772	80.115	-2.7668	0.518824	-5.33283	9.66932e-08	1.48174e-06
272	Zm00001d051544	2250.92	-2.76392	0.266315	-10.3784	3.10963e-25	2.32047e-23
273	Zm00001d046397	3180.48	-2.76126	0.260983	-10.5802	3.68136e-26	2.91271e-24
274	Zm00001d048538	447.571	-2.75544	0.352396	-7.81917	5.31737e-15	1.99375e-13
275	Zm00001d042102	1346.24	-2.75153	0.286366	-9.60846	7.3641e-22	4.51395e-20
276	Zm00001d006563	621.678	-2.73981	0.365147	-7.50332	6.2223e-14	2.10351e-12
277	Zm00001d006230	572.543	-2.73956	0.319495	-8.57465	9.93851e-18	4.68812e-16
278	Zm00001d048663	1156.73	-2.73844	0.35515	-7.71067	1.25159e-14	4.46096e-13
279	Zm00001d028555	5624.86	-2.73496	0.366204	-7.46841	8.11712e-14	2.71528e-12
280	Zm00001d014702	338.286	-2.73292	0.251641	-10.8604	1.77997e-27	1.51583e-25
281	Zm00001d029507	3153.97	-2.72752	0.842686	-3.2367	0.00120921	0.00682346
282	Zm00001d012213	1949.45	-2.72732	0.28433	-9.59207	8.63334e-22	5.26304e-20
283	Zm00001d016567	421.205	-2.72549	0.303041	-8.99379	2.38839e-19	1.23071e-17
284	Zm00001d000308	132.31	-2.72437	0.413699	-6.58538	4.53716e-11	1.1349e-09
285	Zm00001d009350	209.981	-2.71511	0.351077	-7.73364	1.04517e-14	3.77345e-13
286	Zm00001d019312	15325.9	-2.71418	0.329267	-8.24311	1.6779e-16	7.07698e-15
287	Zm00001d049741	208.96	-2.71356	0.459835	-5.90117	3.60939e-09	6.93052e-08
288	Zm00001d052584	916.542	-2.70802	0.459097	-5.89858	3.66647e-09	7.02199e-08
289	Zm00001d029853	154.687	-2.70719	0.374506	-7.22871	4.87618e-13	1.50065e-11
290	Zm00001d019565	177.621	-2.70657	0.472943	-5.72282	1.04768e-08	1.89431e-07
291	Zm00001d033901	174.595	-2.70335	0.387314	-6.97974	2.95734e-12	8.33133e-11
292	Zm00001d008001	29373.5	-2.69915	0.341092	-7.91328	2.50699e-15	9.67752e-14
293	Zm00001d043419	1086.58	-2.69856	0.399706	-6.75136	1.46466e-11	3.84918e-10
294	Zm00001d037052	2302.53	-2.69351	0.257476	-10.4612	1.30192e-25	9.91416e-24
295	Zm00001d053706	69.7606	-2.69063	0.49423	-5.44409	5.20707e-08	8.38846e-07
296	Zm00001d014153	131.012	-2.68763	0.429359	-6.25963	3.85888e-10	8.4827e-09
297	Zm00001d031526	1296.58	-2.68547	0.276078	-9.72724	2.30779e-22	1.46699e-20
298	Zm00001d012979	6207.49	-2.67843	0.324597	-8.25154	1.56365e-16	6.65806e-15
299	Zm00001d043985	412.163	-2.67448	0.486597	-5.49629	3.8786e-08	6.42171e-07
300	Zm00001d030909	127.253	-2.67159	0.431228	-6.19532	5.8168e-10	1.25154e-08
301	Zm00001d050133	2204.61	-2.671	0.244082	-10.943	7.17549e-28	6.40398e-26
302	Zm00001d005736	4222.85	-2.65773	0.410104	-6.48061	9.1353e-11	2.17732e-09
303	Zm00001d047150	130.923	-2.65068	0.439117	-6.0364	1.57594e-09	3.21706e-08
304	Zm00001d011745	2038.12	-2.64182	0.329165	-8.02584	1.00834e-15	4.03914e-14
305	Zm00001d037717	2442.47	-2.64178	0.280162	-9.42947	4.12185e-21	2.38875e-19
306	Zm00001d053006	659.072	-2.63817	0.231937	-11.3745	5.60004e-30	5.67946e-28
307	Zm00001d039000	5005.73	-2.6341	0.236682	-11.1293	9.03348e-29	8.54047e-27
308	Zm00001d011377	504.492	-2.63284	0.27702	-9.50418	2.01634e-21	1.20497e-19
309	Zm00001d013199	498.276	-2.62803	0.324148	-8.10751	5.16695e-16	2.11145e-14
310	Zm00001d031173	449.406	-2.62301	0.336089	-7.80452	5.97276e-15	2.21738e-13
311	Zm00001d013111	4877.22	-2.62051	0.341136	-7.68173	1.56951e-14	5.56739e-13
312	Zm00001d049539	691.486	-2.62022	0.232791	-11.2557	2.17083e-29	2.10589e-27
313	Zm00001d010300	267.881	-2.61336	0.325099	-8.03865	9.08366e-16	3.6592e-14
314	Zm00001d009881	100.288	-2.60035	0.567184	-4.58466	4.54731e-06	5.08936e-05
315	Zm00001d030672	142.486	-2.59547	0.390062	-6.65401	2.85207e-11	7.28095e-10
316	Zm00001d019704	116.746	-2.58474	0.768396	-3.36382	0.000768719	0.00467858
317	Zm00001d039222	314.853	-2.57954	0.273212	-9.44151	3.67453e-21	2.13505e-19
318	Zm00001d011931	777.395	-2.57653	0.265615	-9.70027	3.00705e-22	1.89529e-20
319	Zm00001d045582	138.02	-2.56919	0.552618	-4.64912	3.33354e-06	3.828e-05
320	Zm00001d021241	711.83	-2.56897	0.305382	-8.41233	4.01939e-17	1.79721e-15
321	Zm00001d053015	384.962	-2.55804	0.379086	-6.74792	1.4998e-11	3.93689e-10
322	Zm00001d051008	375.972	-2.55021	0.348795	-7.3115	2.6418e-13	8.36083e-12
323	Zm00001d052910	875.661	-2.54934	0.22801	-11.1808	5.06085e-29	4.82554e-27
324	Zm00001d021444	81.5236	-2.53652	0.677634	-3.7432	0.000181692	0.00135311
325	Zm00001d018096	413.801	-2.53256	0.395403	-6.40501	1.50361e-10	3.49101e-09
326	Zm00001d006590	919.467	-2.52927	0.230396	-10.9779	4.87953e-28	4.40778e-26
327	Zm00001d037483	2747.02	-2.5265	0.244379	-10.3384	4.72136e-25	3.49976e-23
328	Zm00001d016008	594.329	-2.52572	0.434984	-5.80647	6.38031e-09	1.17846e-07
329	Zm00001d023765	211.649	-2.52566	0.395251	-6.39002	1.65868e-10	3.81925e-09
330	Zm00001d046121	611.515	-2.52365	0.319205	-7.90604	2.65707e-15	1.02039e-13
331	Zm00001d019768	453.07	-2.5229	0.385309	-6.54774	5.84157e-11	1.43701e-09
332	Zm00001d030412	100.619	-2.51847	0.601809	-4.18484	2.8537e-05	0.000264198
333	Zm00001d008214	383.005	-2.51568	0.308467	-8.15544	3.47898e-16	1.42952e-14
334	Zm00001d008303	408.101	-2.51147	0.335529	-7.48512	7.148e-14	2.40916e-12
335	Zm00001d004772	716.12	-2.51125	0.285533	-8.79494	1.43131e-18	7.12841e-17
336	Zm00001d023625	101.824	-2.50991	0.469615	-5.34462	9.06094e-08	1.39522e-06
337	Zm00001d023840	274.619	-2.50884	0.37504	-6.68952	2.23903e-11	5.78878e-10
338	Zm00001d042511	281.233	-2.50092	0.338023	-7.39867	1.37557e-13	4.49365e-12
339	Zm00001d034368	7777.79	-2.4961	0.238715	-10.4564	1.36902e-25	1.03896e-23
340	Zm00001d034356	2513	-2.49564	0.471093	-5.29755	1.1737e-07	1.77422e-06
341	Zm00001d036674	87.2538	-2.49463	0.466438	-5.34826	8.88027e-08	1.37024e-06
342	Zm00001d021202	1985.96	-2.49076	0.205792	-12.1033	1.01476e-33	1.16109e-31
343	Zm00001d031213	91.8067	-2.47762	0.49226	-5.03314	4.82513e-07	6.53663e-06
344	Zm00001d012700	79.8063	-2.4766	0.634224	-3.90492	9.42566e-05	0.000760048
345	Zm00001d005378	163.09	-2.4737	0.317275	-7.79672	6.35348e-15	2.35089e-13
346	Zm00001d000377	132.652	-2.47243	0.519767	-4.75681	1.96673e-06	2.37326e-05
347	Zm00001d032866	226.598	-2.46853	0.567033	-4.35342	1.34032e-05	0.000135012
348	Zm00001d051877	157.919	-2.46264	0.378111	-6.513	7.36629e-11	1.78068e-09
349	Zm00001d026185	100.411	-2.46213	0.396405	-6.21114	5.26023e-10	1.13837e-08
350	Zm00001d019335	2536.75	-2.45993	0.37677	-6.52901	6.62062e-11	1.61266e-09
351	Zm00001d001082	77.6974	-2.45603	0.493757	-4.97418	6.5526e-07	8.70248e-06
352	Zm00001d010360	864.956	-2.45325	0.296056	-8.28643	1.16695e-16	5.03615e-15
353	Zm00001d002564	98.6191	-2.45199	0.605023	-4.05273	5.06245e-05	0.000437464
354	Zm00001d021345	93.2452	-2.44387	0.496937	-4.91788	8.74873e-07	1.1402e-05
355	Zm00001d002101	75.287	-2.42908	0.543809	-4.46679	7.94032e-06	8.4525e-05
356	Zm00001d033867	572.912	-2.42702	0.308303	-7.87218	3.48513e-15	1.32697e-13
357	Zm00001d048478	264.6	-2.42332	0.50203	-4.82704	1.38575e-06	1.72828e-05
358	Zm00001d014650	176.578	-2.42198	0.49639	-4.87918	1.06526e-06	1.36338e-05
359	Zm00001d051334	142.968	-2.42187	0.501058	-4.83352	1.3414e-06	1.67672e-05
360	Zm00001d015125	388.23	-2.41178	0.234811	-10.2712	9.50379e-25	6.95242e-23
361	Zm00001d012764	90.4004	-2.40796	0.516563	-4.6615	3.13911e-06	3.6215e-05
362	Zm00001d020869	302.054	-2.40792	0.315343	-7.63587	2.24294e-14	7.86862e-13
363	Zm00001d010613	236.707	-2.40664	0.381439	-6.30936	2.80184e-10	6.264e-09
364	Zm00001d004968	235.825	-2.4018	0.414434	-5.79537	6.81706e-09	1.25704e-07
365	Zm00001d042755	299.53	-2.39644	0.324684	-7.38084	1.57289e-13	5.09353e-12
366	Zm00001d053757	74.7546	-2.39138	0.491309	-4.86736	1.13098e-06	1.44032e-05
367	Zm00001d034506	952.098	-2.3895	0.247342	-9.66068	4.42929e-22	2.76051e-20
368	Zm00001d013234	114.894	-2.3889	0.513986	-4.6478	3.35491e-06	3.84858e-05
369	Zm00001d049097	913.497	-2.3889	0.248598	-9.60949	7.29114e-22	4.48154e-20
370	Zm00001d005566	470.825	-2.38854	0.25132	-9.504	2.0198e-21	1.20497e-19
371	Zm00001d019053	143.034	-2.38728	0.474788	-5.02809	4.9538e-07	6.7028e-06
372	Zm00001d003742	480.833	-2.38518	0.359527	-6.6342	3.26257e-11	8.28151e-10
373	Zm00001d006476	681.044	-2.3833	0.296083	-8.04945	8.31695e-16	3.36784e-14
374	Zm00001d017147	1047.26	-2.37964	0.347315	-6.85153	7.30651e-12	1.99295e-10
375	Zm00001d013222	2027.24	-2.37931	0.334081	-7.12196	1.06402e-12	3.14442e-11
376	Zm00001d038853	171.92	-2.37189	0.402698	-5.89	3.86189e-09	7.35837e-08
377	Zm00001d018417	54.0687	-2.36341	0.562854	-4.19898	2.68117e-05	0.00024978
378	Zm00001d007509	320.248	-2.36212	0.404371	-5.84147	5.17423e-09	9.66897e-08
379	Zm00001d051453	718.635	-2.35786	0.217465	-10.8425	2.16583e-27	1.81996e-25
380	Zm00001d034330	342.413	-2.35541	0.36124	-6.52033	7.01515e-11	1.70133e-09
381	Zm00001d018002	87.1205	-2.35385	0.43185	-5.45062	5.01932e-08	8.12117e-07
382	Zm00001d009820	300.322	-2.35257	0.397135	-5.92385	3.14495e-09	6.12305e-08
383	Zm00001d043418	16807.8	-2.35164	0.248269	-9.47216	2.74118e-21	1.61375e-19
384	Zm00001d004346	46.4083	-2.34423	0.744271	-3.1497	0.00163439	0.00884248
385	Zm00001d023785	673.696	-2.33937	0.223967	-10.4451	1.54215e-25	1.16244e-23
386	Zm00001d023411	233.548	-2.33815	0.280176	-8.34529	7.10367e-17	3.10778e-15
387	Zm00001d002600	1051.51	-2.33579	0.372758	-6.26624	3.69879e-10	8.16294e-09
388	Zm00001d013463	401.178	-2.32975	0.394703	-5.90254	3.57954e-09	6.87912e-08
389	Zm00001d038283	139.099	-2.32742	0.34294	-6.78665	1.14764e-11	3.06661e-10
390	Zm00001d052106	552.749	-2.32147	0.339015	-6.84768	7.50583e-12	2.04481e-10
391	Zm00001d023713	122.106	-2.31975	0.434366	-5.34054	9.26676e-08	1.42397e-06
392	Zm00001d022243	5437.04	-2.31571	0.205611	-11.2626	2.00719e-29	1.96422e-27
393	Zm00001d004840	234.479	-2.3138	0.455641	-5.07811	3.81201e-07	5.25347e-06
394	Zm00001d041700	1821.24	-2.3115	0.282253	-8.18946	2.62404e-16	1.09027e-14
395	Zm00001d022277	307.099	-2.29972	0.44711	-5.14352	2.69637e-07	3.82945e-06
396	Zm00001d039647	120.793	-2.29933	0.373243	-6.16042	7.25543e-10	1.54321e-08
397	Zm00001d031923	94.2397	-2.29725	0.400072	-5.74209	9.35144e-09	1.70048e-07
398	Zm00001d051018	300.024	-2.29506	0.401214	-5.72029	1.06344e-08	1.9197e-07
399	Zm00001d049686	67.7348	-2.29284	0.465139	-4.92936	8.2499e-07	1.07746e-05
400	Zm00001d046112	103.19	-2.29093	0.39608	-5.78401	7.29406e-09	1.33836e-07
401	Zm00001d022241	900.903	-2.28706	0.306095	-7.47175	7.91381e-14	2.65523e-12
402	Zm00001d034772	5411.57	-2.28627	0.388477	-5.88521	3.97551e-09	7.56194e-08
403	Zm00001d018703	1674.3	-2.28439	0.264799	-8.62686	6.30588e-18	3.01924e-16
404	Zm00001d044138	1209.59	-2.28412	0.234182	-9.75361	1.78031e-22	1.14145e-20
405	Zm00001d020134	63.8241	-2.28258	0.599184	-3.80949	0.000139256	0.00107326
406	Zm00001d030037	170.111	-2.28168	0.407649	-5.59717	2.17882e-08	3.77436e-07
407	Zm00001d023304	863.142	-2.28107	0.497143	-4.58835	4.46764e-06	5.01671e-05
408	Zm00001d017686	2443.73	-2.28062	0.301643	-7.56067	4.00997e-14	1.37435e-12
409	Zm00001d007581	545.346	-2.27613	0.274889	-8.28018	1.22993e-16	5.28749e-15
410	Zm00001d025581	896.217	-2.27471	0.217395	-10.4635	1.27108e-25	9.71248e-24
411	Zm00001d026263	7270.1	-2.27159	0.235478	-9.64671	5.07567e-22	3.14579e-20
412	Zm00001d006521	100.287	-2.2699	0.523844	-4.33315	1.46992e-05	0.000146089
413	Zm00001d048166	214.258	-2.26411	0.39847	-5.68202	1.33112e-08	2.36465e-07
414	Zm00001d052713	88.29	-2.26061	0.646515	-3.49661	0.000471214	0.00310506
415	Zm00001d031940	3736.32	-2.25931	0.320425	-7.05098	1.77658e-12	5.12015e-11
416	Zm00001d002407	57.9567	-2.25626	0.585583	-3.85301	0.000116673	0.000919211
417	Zm00001d051415	1844.42	-2.25538	0.243238	-9.2723	1.82175e-20	1.01364e-18
418	Zm00001d023402	255.203	-2.25294	0.301752	-7.46619	8.25507e-14	2.75729e-12
419	Zm00001d042447	185.598	-2.25256	0.339586	-6.63325	3.28369e-11	8.32565e-10
420	Zm00001d047895	53.1182	-2.25246	0.508071	-4.43335	9.27794e-06	9.70508e-05
421	Zm00001d018496	2927.8	-2.25238	0.271195	-8.30537	9.95085e-17	4.31113e-15
422	Zm00001d011610	1293.99	-2.2505	0.405121	-5.55513	2.77412e-08	4.7249e-07
423	Zm00001d033972	238.762	-2.24686	0.360097	-6.2396	4.38692e-10	9.58678e-09
424	Zm00001d034457	651.452	-2.24273	0.264081	-8.49257	2.02116e-17	9.25998e-16
425	Zm00001d023213	387.8	-2.24259	0.44268	-5.06593	4.06401e-07	5.57664e-06
426	Zm00001d047345	82.5915	-2.24216	0.576115	-3.89185	9.94814e-05	0.000797854
427	Zm00001d036647	163.016	-2.24196	0.46584	-4.81272	1.48888e-06	1.84555e-05
428	Zm00001d007213	2642.9	-2.23963	0.248316	-9.01926	1.89366e-19	9.84882e-18
429	Zm00001d028399	135.945	-2.23568	0.546725	-4.08921	4.32837e-05	0.000380515
430	Zm00001d038067	138.149	-2.22734	0.522127	-4.26589	1.99104e-05	0.000190989
431	Zm00001d043944	105.691	-2.22599	0.428765	-5.19163	2.08463e-07	3.01441e-06
432	Zm00001d007567	46.6104	-2.2174	0.574082	-3.86252	0.000112225	0.000889195
433	Zm00001d047369	228.289	-2.2143	0.301997	-7.33219	2.26421e-13	7.217e-12
434	Zm00001d019887	228.432	-2.21292	0.346644	-6.38382	1.72723e-10	3.9689e-09
435	Zm00001d013346	1869.97	-2.21285	0.199985	-11.0651	1.85278e-28	1.71532e-26
436	Zm00001d048201	6945.87	-2.21149	0.409271	-5.40347	6.53632e-08	1.03212e-06
437	Zm00001d014649	372.48	-2.20919	0.437399	-5.05073	4.40117e-07	6.00972e-06
438	Zm00001d011656	113.859	-2.20569	0.547236	-4.03061	5.56328e-05	0.000475403
439	Zm00001d009549	596.575	-2.19839	0.25726	-8.5454	1.28087e-17	5.96634e-16
440	Zm00001d011193	826.707	-2.19648	0.231157	-9.50213	2.05639e-21	1.22352e-19
441	Zm00001d050119	1314.63	-2.19441	0.280939	-7.811	5.6738e-15	2.11342e-13
442	Zm00001d049120	1398.32	-2.19302	0.292634	-7.49407	6.67711e-14	2.25385e-12
443	Zm00001d033230	405.744	-2.19227	0.376794	-5.81821	5.94811e-09	1.10136e-07
444	Zm00001d010489	510.518	-2.19068	0.350792	-6.24495	4.23933e-10	9.28242e-09
445	Zm00001d022101	132.587	-2.18443	0.603216	-3.62131	0.000293121	0.00206117
446	Zm00001d037695	664.802	-2.18255	0.351021	-6.21774	5.04374e-10	1.09364e-08
447	Zm00001d033340	83.3731	-2.17037	0.46409	-4.67662	2.91642e-06	3.38032e-05
448	Zm00001d043923	1065.04	-2.16884	0.334674	-6.48047	9.14375e-11	2.17732e-09
449	Zm00001d028471	150.584	-2.16372	0.569326	-3.8005	0.000144406	0.00110797
450	Zm00001d051419	8915.24	-2.16153	0.236286	-9.14794	5.803e-20	3.15028e-18
451	Zm00001d023723	80.7347	-2.1594	0.492611	-4.38357	1.16748e-05	0.000119271
452	Zm00001d016091	1922.54	-2.15838	0.379306	-5.69034	1.26784e-08	2.25763e-07
453	Zm00001d017418	518.482	-2.1543	0.328704	-6.55392	5.60456e-11	1.38635e-09
454	Zm00001d041709	92.6826	-2.15279	0.528743	-4.07153	4.67045e-05	0.000406582
455	Zm00001d031569	41200.6	-2.14983	0.262187	-8.19961	2.41163e-16	1.00389e-14
456	Zm00001d033313	207.364	-2.14907	0.472338	-4.54986	5.36806e-06	5.92638e-05
457	Zm00001d008398	382.623	-2.14794	0.28549	-7.52369	5.32509e-14	1.80293e-12
458	Zm00001d012418	206.535	-2.14566	0.396146	-5.41634	6.08322e-08	9.66042e-07
459	Zm00001d053886	474.038	-2.14502	0.271836	-7.89086	3.00107e-15	1.15051e-13
460	Zm00001d045123	189.073	-2.14433	0.32686	-6.56039	5.36659e-11	1.33044e-09
461	Zm00001d037112	88.935	-2.14208	0.458761	-4.66928	3.02261e-06	3.49433e-05
462	Zm00001d040672	4703.35	-2.14013	0.22723	-9.41836	4.58202e-21	2.64855e-19
463	Zm00001d000117	117.373	-2.13798	0.490093	-4.36239	1.2865e-05	0.000130002
464	Zm00001d039680	102.039	-2.13679	0.417003	-5.12416	2.98862e-07	4.20442e-06
465	Zm00001d034613	136.403	-2.13677	0.329042	-6.49392	8.3629e-11	2.00207e-09
466	Zm00001d021278	978.441	-2.13534	0.231942	-9.20637	3.37351e-20	1.85851e-18
467	Zm00001d035920	847.834	-2.13041	0.251182	-8.48153	2.22248e-17	1.01615e-15
468	Zm00001d038149	6167.1	-2.12994	0.209022	-10.19	2.1969e-24	1.57106e-22
469	Zm00001d021844	95.0783	-2.12608	0.383612	-5.54228	2.98551e-08	5.04432e-07
470	Zm00001d036499	60.867	-2.11956	0.539498	-3.92876	8.53838e-05	0.000696812
471	Zm00001d043806	238.061	-2.11605	0.435789	-4.85567	1.19979e-06	1.51412e-05
472	Zm00001d008581	880.843	-2.11507	0.231634	-9.1311	6.78073e-20	3.65439e-18
473	Zm00001d048242	373.136	-2.11263	0.380421	-5.55339	2.80177e-08	4.75867e-07
474	Zm00001d005429	594.966	-2.10777	0.342189	-6.15966	7.29025e-10	1.54767e-08
475	Zm00001d011712	130.12	-2.10472	0.355581	-5.9191	3.23706e-09	6.27828e-08
476	Zm00001d005785	2751.87	-2.10469	0.255293	-8.2442	1.66262e-16	7.02667e-15
477	Zm00001d043851	3963.71	-2.10462	0.189586	-11.1011	1.23908e-28	1.16651e-26
478	Zm00001d013080	107.091	-2.1045	0.492224	-4.2755	1.90712e-05	0.000184286
479	Zm00001d039022	111.818	-2.09752	0.342209	-6.12934	8.8242e-10	1.85217e-08
480	Zm00001d031543	13693.7	-2.09202	0.297075	-7.04206	1.89424e-12	5.43243e-11
481	Zm00001d050475	2497.37	-2.09054	0.259756	-8.0481	8.40874e-16	3.39884e-14
482	Zm00001d012508	1124.9	-2.08903	0.247207	-8.45051	2.90041e-17	1.31266e-15
483	Zm00001d014947	1692.67	-2.0888	0.304452	-6.86085	6.84517e-12	1.87168e-10
484	Zm00001d046465	110.543	-2.08545	0.372246	-5.60234	2.11476e-08	3.6691e-07
485	Zm00001d031357	55.8122	-2.08536	0.578998	-3.60167	0.000316185	0.00219363
486	Zm00001d042543	2226.77	-2.08508	0.473298	-4.40543	1.05575e-05	0.000109106
487	Zm00001d040644	280.486	-2.08355	0.343219	-6.07061	1.27424e-09	2.61554e-08
488	Zm00001d000316	639.133	-2.07734	0.229287	-9.05997	1.30481e-19	6.86625e-18
489	Zm00001d052079	2499.23	-2.07498	0.279439	-7.4255	1.12357e-13	3.70298e-12
490	Zm00001d024687	192.689	-2.07283	0.348793	-5.94288	2.80063e-09	5.49583e-08
491	Zm00001d001924	367.135	-2.0728	0.307847	-6.73321	1.65956e-11	4.32067e-10
492	Zm00001d021040	90.3397	-2.06966	0.435539	-4.75196	2.01456e-06	2.42573e-05
493	Zm00001d033612	125.116	-2.06582	0.423726	-4.87538	1.08601e-06	1.38702e-05
494	Zm00001d012291	581.037	-2.06477	0.300092	-6.88045	5.9662e-12	1.63938e-10
495	Zm00001d029164	120.529	-2.06165	0.374093	-5.51107	3.56663e-08	5.96095e-07
496	Zm00001d028021	121.497	-2.06071	0.385431	-5.34652	8.96616e-08	1.38254e-06
497	Zm00001d012131	1534.82	-2.05675	0.244714	-8.40469	4.28996e-17	1.91053e-15
498	Zm00001d014469	39.9769	-2.05074	0.587824	-3.48869	0.000485385	0.00317883
499	Zm00001d015520	4988.72	-2.0483	0.279308	-7.33348	2.24259e-13	7.15833e-12
500	Zm00001d007228	252.115	-2.04638	0.314398	-6.50888	7.57146e-11	1.82435e-09
501	Zm00001d018003	72.1439	-2.04453	0.444868	-4.59581	4.3108e-06	4.86016e-05
502	Zm00001d028630	246.977	-2.04177	0.296499	-6.88627	5.72732e-12	1.57763e-10
503	Zm00001d016588	475.656	-2.03936	0.259332	-7.86392	3.72302e-15	1.41272e-13
504	Zm00001d054052	1259.36	-2.03906	0.391945	-5.20241	1.96716e-07	2.85936e-06
505	Zm00001d010514	140.461	-2.03274	0.49377	-4.11678	3.84197e-05	0.000342938
506	Zm00001d016164	2125.66	-2.03086	0.303978	-6.68093	2.37433e-11	6.12439e-10
507	Zm00001d037818	529.627	-2.03084	0.26985	-7.52582	5.23895e-14	1.77647e-12
508	Zm00001d023430	489.846	-2.02901	0.231113	-8.77931	1.64481e-18	8.15532e-17
509	Zm00001d050134	973.486	-2.0282	0.490467	-4.13524	3.54586e-05	0.000319786
510	Zm00001d038991	1092.18	-2.02671	0.246873	-8.20953	2.2205e-16	9.31275e-15
511	Zm00001d041792	178.817	-2.02606	0.372232	-5.443	5.23893e-08	8.42762e-07
512	Zm00001d008133	148.636	-2.02602	0.55958	-3.6206	0.000293916	0.00206481
513	Zm00001d012994	109.042	-2.02596	0.548303	-3.69497	0.000219916	0.00160614
514	Zm00001d040115	113.791	-2.02181	0.624344	-3.23829	0.00120247	0.00679054
515	Zm00001d034455	467.211	-2.02132	0.26594	-7.60066	2.94628e-14	1.02395e-12
516	Zm00001d011577	62.2555	-2.0207	0.442272	-4.5689	4.90297e-06	5.46429e-05
517	Zm00001d023316	1411.35	-2.02033	0.241679	-8.35957	6.29483e-17	2.78671e-15
518	Zm00001d017702	617.297	-2.01908	0.311006	-6.49211	8.46425e-11	2.02416e-09
519	Zm00001d041990	72.0872	-2.01761	0.627271	-3.21649	0.00129769	0.00725121
520	Zm00001d039859	6643.22	-2.01722	0.41744	-4.83235	1.34928e-06	1.68562e-05
521	Zm00001d015382	250.002	-2.01319	0.30951	-6.50444	7.79835e-11	1.87506e-09
522	Zm00001d031338	1516.7	-2.00845	0.235574	-8.52577	1.51802e-17	6.99793e-16
523	Zm00001d008099	206.151	-2.00707	0.484386	-4.14353	3.42002e-05	0.000309637
524	Zm00001d003806	605.545	-2.00625	0.35212	-5.69764	1.21479e-08	2.17182e-07
525	Zm00001d047726	888.079	-2.0057	0.256376	-7.82328	5.14646e-15	1.93313e-13
526	Zm00001d021692	847.604	-2.00359	0.368253	-5.44082	5.30373e-08	8.51957e-07
527	Zm00001d037361	154.135	-2.00294	0.46514	-4.3061	1.66158e-05	0.000163246
528	Zm00001d029028	754.908	-2.00135	0.30254	-6.61515	3.71183e-11	9.36859e-10
529	Zm00001d012274	95.9144	-1.99782	0.466412	-4.28339	1.8407e-05	0.00017872
530	Zm00001d003277	1590.94	-1.99777	0.25024	-7.98339	1.42364e-15	5.61205e-14
531	Zm00001d021843	147.761	-1.99552	0.356186	-5.60247	2.11318e-08	3.6691e-07
532	Zm00001d018983	444.795	-1.99434	0.274704	-7.25997	3.87174e-13	1.20651e-11
533	Zm00001d007885	297.659	-1.9931	0.35923	-5.54827	2.88511e-08	4.89526e-07
534	Zm00001d030250	65.2264	-1.99299	0.54145	-3.68084	0.000232467	0.00168567
535	Zm00001d009474	78.3217	-1.98482	0.453599	-4.37572	1.2103e-05	0.000123251
536	Zm00001d028588	212.417	-1.98059	0.410647	-4.8231	1.41344e-06	1.75986e-05
537	Zm00001d052639	457.355	-1.97996	0.396389	-4.99498	5.88431e-07	7.87115e-06
538	Zm00001d044015	277.247	-1.9783	0.380352	-5.20124	1.97964e-07	2.87563e-06
539	Zm00001d014127	346.524	-1.97819	0.311011	-6.36051	2.01079e-10	4.57804e-09
540	Zm00001d028007	987.163	-1.97788	0.37994	-5.20577	1.93196e-07	2.81738e-06
541	Zm00001d004344	49.054	-1.9765	0.773199	-2.55626	0.0105804	0.0412205
542	Zm00001d006553	3118.12	-1.97599	0.344985	-5.72778	1.01756e-08	1.84434e-07
543	Zm00001d047582	80.6026	-1.97239	0.593093	-3.32559	0.000882303	0.0052566
544	Zm00001d031837	2861.61	-1.97198	0.202345	-9.74564	1.92554e-22	1.23102e-20
545	Zm00001d001905	437.864	-1.96803	0.310576	-6.3367	2.3474e-10	5.29542e-09
546	Zm00001d024722	2992.05	-1.96479	0.192985	-10.181	2.41017e-24	1.71807e-22
547	Zm00001d048215	320.272	-1.96435	0.373909	-5.25356	1.4919e-07	2.22212e-06
548	Zm00001d005811	45.0701	-1.96242	0.546178	-3.59301	0.000326883	0.00225802
549	Zm00001d013258	473.971	-1.95711	0.372277	-5.25713	1.46319e-07	2.18227e-06
550	Zm00001d052721	8507.84	-1.95486	0.211888	-9.22592	2.81128e-20	1.55261e-18
551	Zm00001d023923	51.9487	-1.95037	0.598971	-3.2562	0.00112913	0.00644655
552	Zm00001d044261	2833.83	-1.94745	0.202396	-9.62198	6.45788e-22	3.99136e-20
553	Zm00001d038619	110.693	-1.94709	0.43891	-4.43619	9.15652e-06	9.59156e-05
554	Zm00001d049905	814.102	-1.94676	0.332278	-5.85883	4.66137e-09	8.75458e-08
555	Zm00001d005748	432.966	-1.94635	0.369363	-5.26948	1.36811e-07	2.04593e-06
556	Zm00001d033369	15620.3	-1.94609	0.269394	-7.22395	5.04989e-13	1.54771e-11
557	Zm00001d046377	858.138	-1.94592	0.301458	-6.45505	1.08184e-10	2.53817e-09
558	Zm00001d010862	2987.48	-1.94024	0.188831	-10.275	9.13252e-25	6.72491e-23
559	Zm00001d031148	75.5934	-1.93842	0.572554	-3.38557	0.000710301	0.00438038
560	Zm00001d002584	117.554	-1.93655	0.658877	-2.93917	0.00329097	0.0159142
561	Zm00001d012505	344.476	-1.93517	0.622065	-3.11088	0.00186532	0.00991162
562	Zm00001d038268	183.955	-1.93507	0.375349	-5.15539	2.53105e-07	3.61773e-06
563	Zm00001d045581	1784.88	-1.93457	0.218231	-8.86478	7.66544e-19	3.86075e-17
564	Zm00001d034217	508.136	-1.93395	0.267945	-7.2177	5.28754e-13	1.61389e-11
565	Zm00001d029656	202.692	-1.93293	0.306692	-6.30252	2.92848e-10	6.53403e-09
566	Zm00001d024733	103.539	-1.93254	0.43362	-4.45676	8.32078e-06	8.81126e-05
567	Zm00001d012041	304.05	-1.93208	0.289187	-6.68107	2.37208e-11	6.12439e-10
568	Zm00001d032016	564.961	-1.92762	0.309057	-6.23709	4.45773e-10	9.72247e-09
569	Zm00001d009556	2050.48	-1.92524	0.227969	-8.44521	3.03493e-17	1.36523e-15
570	Zm00001d050272	180.068	-1.92284	0.349855	-5.49609	3.88297e-08	6.42229e-07
571	Zm00001d032213	143.47	-1.92268	0.492565	-3.90341	9.4846e-05	0.000763697
572	Zm00001d045124	1350.32	-1.9219	0.375565	-5.11736	3.09838e-07	4.33695e-06
573	Zm00001d018941	945.907	-1.91444	0.251106	-7.62402	2.45904e-14	8.5997e-13
574	Zm00001d002693	105.1	-1.90941	0.569651	-3.3519	0.000802602	0.00484514
575	Zm00001d051990	112.779	-1.90929	0.379605	-5.02968	4.91306e-07	6.65172e-06
576	Zm00001d038066	73.5552	-1.90821	0.540199	-3.53243	0.000411756	0.00276055
577	Zm00001d049218	371.896	-1.90673	0.276235	-6.90255	5.10786e-12	1.41048e-10
578	Zm00001d049161	75.2136	-1.90328	0.691033	-2.75425	0.00588264	0.0258424
579	Zm00001d051562	513.105	-1.90241	0.28658	-6.63833	3.17266e-11	8.06245e-10
580	Zm00001d043986	4272.96	-1.90159	0.193579	-9.82332	8.93481e-23	5.89803e-21
581	Zm00001d005451	5509.86	-1.89826	0.276402	-6.86774	6.52266e-12	1.78569e-10
582	Zm00001d026231	2501.98	-1.89705	0.229927	-8.25066	1.57527e-16	6.69474e-15
583	Zm00001d003524	36.7298	-1.8953	0.57942	-3.27103	0.00107156	0.00619077
584	Zm00001d018470	474.718	-1.89163	0.22087	-8.56445	1.08597e-17	5.10108e-16
585	Zm00001d027315	49.4136	-1.89007	0.565525	-3.34215	0.000831317	0.00499821
586	Zm00001d025053	105.449	-1.88979	0.536786	-3.52057	0.000430628	0.00286725
587	Zm00001d043912	625.71	-1.88123	0.333276	-5.64466	1.65505e-08	2.89173e-07
588	Zm00001d020279	138.125	-1.88097	0.502757	-3.74131	0.000183064	0.00136242
589	Zm00001d021059	91.3426	-1.88085	0.536716	-3.50437	0.000457694	0.0030258
590	Zm00001d006307	1201.33	-1.88071	0.22199	-8.47204	2.41135e-17	1.09577e-15
591	Zm00001d031509	247.72	-1.87577	0.360458	-5.20386	1.9519e-07	2.84275e-06
592	Zm00001d008499	196.466	-1.87524	0.317604	-5.90432	3.541e-09	6.8168e-08
593	Zm00001d003102	255.547	-1.8721	0.384096	-4.87405	1.09334e-06	1.39558e-05
594	Zm00001d013703	2135.87	-1.87191	0.205619	-9.10379	8.7232e-20	4.67865e-18
595	Zm00001d014554	335.82	-1.8717	0.294077	-6.36464	1.95746e-10	4.46573e-09
596	Zm00001d014842	56.7433	-1.86829	0.73647	-2.53682	0.0111864	0.0431131
597	Zm00001d037198	155.428	-1.86736	0.318886	-5.85589	4.74475e-09	8.90368e-08
598	Zm00001d038445	551.304	-1.86482	0.350034	-5.32755	9.95472e-08	1.5213e-06
599	Zm00001d008514	829.214	-1.8642	0.288851	-6.45385	1.09046e-10	2.55437e-09
600	Zm00001d039302	85.3139	-1.86301	0.573218	-3.25009	0.00115369	0.00656664
601	Zm00001d050095	361.223	-1.86116	0.327071	-5.69038	1.26759e-08	2.25763e-07
602	Zm00001d037197	199.186	-1.85992	0.340208	-5.46701	4.5769e-08	7.45399e-07
603	Zm00001d045476	1078.91	-1.85792	0.219077	-8.48064	2.23954e-17	1.02185e-15
604	Zm00001d005949	105.582	-1.85637	0.605372	-3.0665	0.0021658	0.0112826
605	Zm00001d003669	420.201	-1.85575	0.350796	-5.29011	1.22243e-07	1.84289e-06
606	Zm00001d011551	655.727	-1.85347	0.286083	-6.4788	9.24557e-11	2.19454e-09
607	Zm00001d039513	1481.88	-1.85135	0.324447	-5.70617	1.15548e-08	2.07576e-07
608	Zm00001d007807	8035.67	-1.85097	0.195046	-9.48992	2.31219e-21	1.36842e-19
609	Zm00001d046925	614.93	-1.85087	0.41507	-4.45917	8.22763e-06	8.72089e-05
610	Zm00001d001835	80.0626	-1.85029	0.55316	-3.34495	0.000822986	0.00495212
611	Zm00001d046119	90.0836	-1.8493	0.372092	-4.96999	6.69559e-07	8.88181e-06
612	Zm00001d036641	4705.89	-1.84751	0.251244	-7.35347	1.93127e-13	6.20007e-12
613	Zm00001d002695	73.144	-1.84157	0.467408	-3.93997	8.14927e-05	0.000668234
614	Zm00001d054054	966.287	-1.84113	0.425505	-4.32693	1.51201e-05	0.000149804
615	Zm00001d045384	1312.99	-1.84085	0.281083	-6.54914	5.78693e-11	1.42514e-09
616	Zm00001d039931	301.972	-1.83976	0.322724	-5.70071	1.19307e-08	2.13642e-07
617	Zm00001d051499	55.4793	-1.83667	0.536077	-3.42614	0.000612234	0.00387303
618	Zm00001d020862	376.648	-1.83509	0.321729	-5.70382	1.17153e-08	2.09954e-07
619	Zm00001d022475	9119.32	-1.83402	0.452575	-4.05242	5.06913e-05	0.000437872
620	Zm00001d045615	133.183	-1.83378	0.430499	-4.25967	2.04728e-05	0.000195711
621	Zm00001d010496	590.852	-1.83368	0.306755	-5.97767	2.26353e-09	4.51734e-08
622	Zm00001d018461	7631.94	-1.83035	0.20829	-8.78751	1.52917e-18	7.59884e-17
623	Zm00001d037228	47.6957	-1.82842	0.616727	-2.96472	0.00302963	0.0148892
624	Zm00001d010343	1221.9	-1.82653	0.264151	-6.91473	4.68757e-12	1.30086e-10
625	Zm00001d019866	482.291	-1.8262	0.262846	-6.94781	3.70991e-12	1.03599e-10
626	Zm00001d029154	182.778	-1.82481	0.331709	-5.50124	3.77138e-08	6.27026e-07
627	Zm00001d051244	601.873	-1.8238	0.481259	-3.78964	0.000150867	0.00115043
628	Zm00001d003492	392.596	-1.81986	0.292678	-6.21794	5.03737e-10	1.09332e-08
629	Zm00001d019403	123.074	-1.81882	0.415786	-4.37441	1.2176e-05	0.000123937
630	Zm00001d007815	5557.42	-1.81638	0.24025	-7.56037	4.01923e-14	1.37541e-12
631	Zm00001d006687	93.3037	-1.8153	0.449446	-4.03897	5.36864e-05	0.000460004
632	Zm00001d040026	15060	-1.81441	0.311717	-5.82068	5.86088e-09	1.08702e-07
633	Zm00001d048983	624.761	-1.81187	0.296871	-6.1032	1.03965e-09	2.16386e-08
634	Zm00001d052500	429.216	-1.81004	0.361044	-5.01335	5.34917e-07	7.1898e-06
635	Zm00001d020306	372.938	-1.8082	0.327787	-5.51638	3.4605e-08	5.80095e-07
636	Zm00001d001776	1118.87	-1.80787	0.242821	-7.44525	9.67608e-14	3.20792e-12
637	Zm00001d001792	46.7626	-1.80762	0.51701	-3.49629	0.00047177	0.00310732
638	Zm00001d039259	1311.6	-1.80674	0.22673	-7.96867	1.60385e-15	6.28913e-14
639	Zm00001d028241	43.4732	-1.80672	0.581772	-3.10555	0.00189927	0.0100824
640	Zm00001d032022	70.9831	-1.80565	0.434788	-4.15294	3.28228e-05	0.000298672
641	Zm00001d034729	492.876	-1.80554	0.325996	-5.53854	3.05005e-08	5.13993e-07
642	Zm00001d043515	158.426	-1.80304	0.383085	-4.70663	2.5185e-06	2.96845e-05
643	Zm00001d018792	429.718	-1.80207	0.325077	-5.54351	2.96471e-08	5.01886e-07
644	Zm00001d013494	67.5795	-1.80154	0.623924	-2.88743	0.00388403	0.0183641
645	Zm00001d027137	505.136	-1.79956	0.376058	-4.78533	1.70703e-06	2.08926e-05
646	Zm00001d031465	183.115	-1.79917	0.480073	-3.74769	0.00017847	0.00133267
647	Zm00001d039679	124.643	-1.79878	0.38406	-4.6836	2.81874e-06	3.28245e-05
648	Zm00001d008181	2140.81	-1.79794	0.21673	-8.29577	1.0788e-16	4.66476e-15
649	Zm00001d036234	152.343	-1.79772	0.407146	-4.41542	1.00814e-05	0.00010467
650	Zm00001d033330	453.557	-1.79502	0.301611	-5.95144	2.65792e-09	5.2342e-08
651	Zm00001d012935	1973.43	-1.79425	0.238399	-7.52626	5.22145e-14	1.77323e-12
652	Zm00001d053816	2625.86	-1.79317	0.191706	-9.35374	8.46024e-21	4.81543e-19
653	Zm00001d031989	101.845	-1.79171	0.488966	-3.66428	0.000248039	0.00178007
654	Zm00001d002833	2841.07	-1.79061	0.231961	-7.71944	1.1684e-14	4.1912e-13
655	Zm00001d028664	62.4295	-1.79013	0.531427	-3.36854	0.000755686	0.00461057
656	Zm00001d044566	1312.43	-1.78699	0.350555	-5.0976	3.43994e-07	4.78504e-06
657	Zm00001d028008	370.671	-1.78621	0.288664	-6.18785	6.09893e-10	1.30971e-08
658	Zm00001d026111	35938.2	-1.78614	0.209137	-8.54052	1.33624e-17	6.19839e-16
659	Zm00001d013810	258.527	-1.78348	0.303868	-5.86926	4.37743e-09	8.27004e-08
660	Zm00001d046676	582.336	-1.78223	0.305745	-5.82914	5.57129e-09	1.03848e-07
661	Zm00001d003279	253.083	-1.78192	0.289863	-6.14744	7.87447e-10	1.66221e-08
662	Zm00001d050443	411.2	-1.78	0.321171	-5.54222	2.98653e-08	5.04432e-07
663	Zm00001d032225	404.509	-1.778	0.345792	-5.14181	2.72106e-07	3.85966e-06
664	Zm00001d010434	610.744	-1.7772	0.366375	-4.85075	1.22994e-06	1.55042e-05
665	Zm00001d047677	1394.78	-1.77504	0.334136	-5.31232	1.08236e-07	1.64956e-06
666	Zm00001d028011	972.694	-1.77354	0.317383	-5.58803	2.29654e-08	3.96905e-07
667	Zm00001d052202	61.6738	-1.77328	0.630843	-2.81098	0.00493916	0.0223444
668	Zm00001d016098	111.489	-1.77209	0.491954	-3.60214	0.000315606	0.00219098
669	Zm00001d035184	394.138	-1.77182	0.273142	-6.4868	8.76815e-11	2.09235e-09
670	Zm00001d031167	278.964	-1.77141	0.274477	-6.45377	1.09103e-10	2.55437e-09
671	Zm00001d008623	107.899	-1.76996	0.430669	-4.1098	3.96009e-05	0.000352303
672	Zm00001d029129	1144.57	-1.76995	0.261071	-6.77956	1.20545e-11	3.20956e-10
673	Zm00001d007190	252.929	-1.764	0.298635	-5.90688	3.48654e-09	6.71777e-08
674	Zm00001d051739	85.9636	-1.76171	0.53938	-3.26618	0.00109007	0.00627494
675	Zm00001d003459	215.393	-1.75958	0.3306	-5.32238	1.02421e-07	1.56307e-06
676	Zm00001d016512	2466.49	-1.75865	0.27903	-6.3027	2.92496e-10	6.5327e-09
677	Zm00001d053221	189.222	-1.7563	0.33135	-5.30044	1.15521e-07	1.74983e-06
678	Zm00001d003276	114.872	-1.75596	0.387549	-4.53092	5.87273e-06	6.43261e-05
679	Zm00001d033568	139.227	-1.75544	0.416597	-4.21375	2.51162e-05	0.000234867
680	Zm00001d006666	30.7467	-1.75528	0.596709	-2.94159	0.0032653	0.0158003
681	Zm00001d030264	436.302	-1.75455	0.450411	-3.89544	9.80195e-05	0.000787544
682	Zm00001d003280	815.306	-1.75283	0.221539	-7.91206	2.53165e-15	9.75582e-14
683	Zm00001d043296	1687.29	-1.75238	0.244214	-7.17556	7.20119e-13	2.16249e-11
684	Zm00001d041800	88.9034	-1.75236	0.465373	-3.7655	0.000166219	0.00125124
685	Zm00001d043599	1236.89	-1.7522	0.231204	-7.57859	3.49342e-14	1.20286e-12
686	Zm00001d037008	58.4916	-1.75121	0.502846	-3.4826	0.000496562	0.00324051
687	Zm00001d041791	463.476	-1.75036	0.288868	-6.05936	1.36664e-09	2.80261e-08
688	Zm00001d006875	615.46	-1.74937	0.230273	-7.59692	3.03259e-14	1.05067e-12
689	Zm00001d024886	1967.17	-1.74909	0.230122	-7.60069	2.94545e-14	1.02395e-12
690	Zm00001d034263	378.787	-1.74511	0.321776	-5.42338	5.84828e-08	9.33382e-07
691	Zm00001d005901	175.085	-1.74469	0.518834	-3.36272	0.000771794	0.00468961
692	Zm00001d033271	109.104	-1.74378	0.596713	-2.92231	0.0034744	0.016664
693	Zm00001d021906	911.672	-1.74273	0.360789	-4.83032	1.36316e-06	1.702e-05
694	Zm00001d038651	758.434	-1.74127	0.247418	-7.03779	1.95307e-12	5.59396e-11
695	Zm00001d023494	4294.7	-1.73983	0.351278	-4.95285	7.31357e-07	9.66136e-06
696	Zm00001d028362	289.025	-1.73764	0.280705	-6.19024	6.00715e-10	1.29125e-08
697	Zm00001d022519	72.7031	-1.73753	0.465566	-3.73207	0.00018991	0.0014068
698	Zm00001d052154	72.8824	-1.73546	0.530615	-3.27066	0.00107297	0.0061942
699	Zm00001d013339	1194.55	-1.73366	0.292066	-5.93586	2.92309e-09	5.71603e-08
700	Zm00001d003422	214.719	-1.73218	0.387269	-4.47282	7.71931e-06	8.24872e-05
701	Zm00001d009609	447.191	-1.73071	0.312319	-5.54147	2.99944e-08	5.05847e-07
702	Zm00001d008527	348.964	-1.72866	0.36462	-4.741	2.12668e-06	2.54836e-05
703	Zm00001d027636	62.2099	-1.72785	0.577115	-2.99394	0.00275399	0.0137942
704	Zm00001d043257	349.589	-1.72736	0.537313	-3.21481	0.00130533	0.00728842
705	Zm00001d029270	976.004	-1.72713	0.331866	-5.2043	1.94733e-07	2.83794e-06
706	Zm00001d027353	417.855	-1.72635	0.320198	-5.39151	6.98671e-08	1.09703e-06
707	Zm00001d040382	33.3059	-1.72507	0.565896	-3.04839	0.00230072	0.0118718
708	Zm00001d040032	96.635	-1.72447	0.392752	-4.39075	1.12963e-05	0.000115988
709	Zm00001d025580	1562.17	-1.72199	0.222504	-7.73917	1.00065e-14	3.61854e-13
710	Zm00001d007987	52.7138	-1.72161	0.652369	-2.63901	0.0083148	0.0340403
711	Zm00001d036224	88.0796	-1.72077	0.538226	-3.19711	0.00138811	0.00769042
712	Zm00001d019450	107.594	-1.71954	0.47456	-3.62344	0.000290715	0.00204555
713	Zm00001d026047	382.926	-1.71902	0.262798	-6.5412	6.10266e-11	1.49629e-09
714	Zm00001d033591	4568.46	-1.71828	0.274397	-6.262	3.80066e-10	8.36296e-09
715	Zm00001d048684	4941.43	-1.71783	0.253436	-6.77816	1.21719e-11	3.23693e-10
716	Zm00001d039045	110.846	-1.71748	0.501482	-3.42482	0.000615208	0.00388743
717	Zm00001d005682	83.0967	-1.71365	0.418464	-4.0951	4.2198e-05	0.000372733
718	Zm00001d013012	2546.78	-1.7075	0.229865	-7.4283	1.10001e-13	3.63068e-12
719	Zm00001d027488	1401.63	-1.70605	0.222985	-7.65096	1.99484e-14	7.02034e-13
720	Zm00001d005742	37.7896	-1.70602	0.558974	-3.05206	0.00227273	0.0117464
721	Zm00001d013409	266.027	-1.70271	0.549531	-3.09847	0.0019452	0.0102773
722	Zm00001d020018	61.4313	-1.69996	0.667568	-2.54649	0.0108811	0.042142
723	Zm00001d023736	9392.42	-1.69833	0.276473	-6.14283	8.10664e-10	1.70798e-08
724	Zm00001d027589	4142.53	-1.69809	0.186153	-9.12203	7.37322e-20	3.96413e-18
725	Zm00001d029461	50.1958	-1.69794	0.591802	-2.8691	0.00411643	0.019218
726	Zm00001d034711	1293.52	-1.69616	0.326137	-5.20076	1.98472e-07	2.88114e-06
727	Zm00001d024017	261.674	-1.69526	0.371807	-4.55951	5.12736e-06	5.68315e-05
728	Zm00001d007290	65.2782	-1.69523	0.572059	-2.96338	0.0030428	0.0149287
729	Zm00001d015227	365.987	-1.69402	0.49511	-3.42151	0.000622748	0.00392396
730	Zm00001d026379	386.432	-1.69358	0.333978	-5.07092	3.95888e-07	5.43908e-06
731	Zm00001d042064	3141.18	-1.69287	0.219354	-7.71753	1.18607e-14	4.24775e-13
732	Zm00001d002899	172.849	-1.69145	0.470846	-3.59238	0.000327674	0.00226279
733	Zm00001d030399	253.811	-1.69111	0.3425	-4.93756	7.91055e-07	1.03763e-05
734	Zm00001d002774	63.1854	-1.69103	0.596054	-2.83704	0.00455339	0.0209087
735	Zm00001d023384	222.228	-1.68994	0.287252	-5.88312	4.02596e-09	7.65139e-08
736	Zm00001d012308	2416.15	-1.68944	0.265279	-6.36854	1.90841e-10	4.36276e-09
737	Zm00001d005889	43.3739	-1.68771	0.573444	-2.94311	0.00324932	0.0157401
738	Zm00001d052881	607.548	-1.68683	0.360211	-4.68288	2.82875e-06	3.29067e-05
739	Zm00001d002158	356.89	-1.68676	0.404796	-4.16694	3.08716e-05	0.000283226
740	Zm00001d040769	1365.79	-1.68652	0.340808	-4.94861	7.47472e-07	9.85674e-06
741	Zm00001d034769	32.1472	-1.68377	0.633703	-2.65703	0.00788322	0.0326206
742	Zm00001d029550	679.2	-1.68261	0.246983	-6.81267	9.58039e-12	2.57861e-10
743	Zm00001d011688	1544.87	-1.68258	0.30654	-5.48894	4.0436e-08	6.66328e-07
744	Zm00001d011660	67.0565	-1.67812	0.566575	-2.96188	0.0030577	0.0149876
745	Zm00001d006874	1229.23	-1.67755	0.281835	-5.95224	2.64499e-09	5.21893e-08
746	Zm00001d039179	2429.28	-1.67736	0.396997	-4.22511	2.38827e-05	0.000224745
747	Zm00001d007891	206.583	-1.67697	0.352743	-4.75408	1.99356e-06	2.40434e-05
748	Zm00001d047077	833.691	-1.67502	0.289637	-5.78317	7.33067e-09	1.34367e-07
749	Zm00001d014063	282.004	-1.67489	0.371871	-4.50396	6.66984e-06	7.21364e-05
750	Zm00001d044999	282.639	-1.67434	0.366647	-4.56662	4.95646e-06	5.51289e-05
751	Zm00001d011454	442.869	-1.67231	0.336238	-4.97361	6.57179e-07	8.72278e-06
752	Zm00001d020827	5771.32	-1.67108	0.209171	-7.98904	1.35998e-15	5.38969e-14
753	Zm00001d040365	525.618	-1.66999	0.268019	-6.23088	4.63836e-10	1.01066e-08
754	Zm00001d026941	477.84	-1.66841	0.291302	-5.72742	1.01969e-08	1.84669e-07
755	Zm00001d038760	39.5544	-1.66675	0.590206	-2.82401	0.00474263	0.0216054
756	Zm00001d017609	2394.2	-1.66623	0.273391	-6.09467	1.09666e-09	2.27615e-08
757	Zm00001d008392	63.6018	-1.66605	0.476915	-3.49338	0.000476952	0.00313361
758	Zm00001d013162	2388.17	-1.66385	0.233936	-7.1124	1.14038e-12	3.36119e-11
759	Zm00001d014755	92.0566	-1.66368	0.509722	-3.26389	0.00109892	0.00631774
760	Zm00001d005154	1664.19	-1.6626	0.369226	-4.50292	6.70268e-06	7.24565e-05
761	Zm00001d032901	185.536	-1.66124	0.357494	-4.64691	3.36938e-06	3.86319e-05
762	Zm00001d006641	53.6586	-1.66079	0.459158	-3.61704	0.000297997	0.00208822
763	Zm00001d018086	323.057	-1.65975	0.379536	-4.37309	1.22502e-05	0.000124579
764	Zm00001d035589	595.3	-1.65531	0.349831	-4.73174	2.22606e-06	2.65178e-05
765	Zm00001d027993	128.269	-1.65501	0.469824	-3.52261	0.000427316	0.0028486
766	Zm00001d042684	64.4876	-1.65483	0.63427	-2.60903	0.00908005	0.03651
767	Zm00001d052405	74.4157	-1.65471	0.472777	-3.49998	0.000465289	0.00306783
768	Zm00001d023559	259.538	-1.6546	0.380486	-4.34866	1.36971e-05	0.0001376
769	Zm00001d040726	697.565	-1.65446	0.219057	-7.55264	4.2651e-14	1.45732e-12
770	Zm00001d035401	77.1982	-1.65328	0.590278	-2.80084	0.00509693	0.0229419
771	Zm00001d032576	424.842	-1.64931	0.390403	-4.22463	2.39337e-05	0.00022513
772	Zm00001d032306	137.963	-1.6492	0.439091	-3.75595	0.000172686	0.00129381
773	Zm00001d026521	639.455	-1.64799	0.239857	-6.87069	6.3891e-12	1.75127e-10
774	Zm00001d044419	112.198	-1.6461	0.388215	-4.24018	2.23336e-05	0.000211596
775	Zm00001d018244	104.598	-1.64485	0.424474	-3.87503	0.000106613	0.000850462
776	Zm00001d032808	2619.94	-1.64363	0.326508	-5.03397	4.80419e-07	6.51221e-06
777	Zm00001d042989	102.866	-1.64252	0.500102	-3.28437	0.00102209	0.00593606
778	Zm00001d000135	1295.93	-1.64169	0.357925	-4.58669	4.50326e-06	5.04909e-05
779	Zm00001d023381	321.202	-1.6413	0.398689	-4.11675	3.84252e-05	0.000342938
780	Zm00001d026137	57.7	-1.64106	0.605173	-2.71173	0.00669331	0.0286478
781	Zm00001d018034	2756.52	-1.63931	0.275591	-5.94836	2.70835e-09	5.32881e-08
782	Zm00001d014553	555.976	-1.63614	0.266954	-6.12892	8.84767e-10	1.85535e-08
783	Zm00001d028992	889.638	-1.63529	0.251537	-6.50119	7.96864e-11	1.91179e-09
784	Zm00001d006567	5583.47	-1.63257	0.205261	-7.95365	1.81096e-15	7.06402e-14
785	Zm00001d003767	413.208	-1.63245	0.427409	-3.81941	0.000133772	0.00103672
786	Zm00001d039303	131.897	-1.62837	0.440897	-3.69332	0.000221347	0.00161501
787	Zm00001d003435	1804.48	-1.62751	0.235726	-6.90423	5.04766e-12	1.39558e-10
788	Zm00001d009631	3294.19	-1.62708	0.249398	-6.52406	6.84309e-11	1.66321e-09
789	Zm00001d036965	2216.67	-1.62676	0.340793	-4.77346	1.81091e-06	2.19952e-05
790	Zm00001d007712	97.5948	-1.62641	0.430221	-3.7804	0.000156578	0.00118748
791	Zm00001d018802	199.278	-1.62515	0.381871	-4.25574	2.08357e-05	0.000198924
792	Zm00001d013037	432.605	-1.62491	0.317034	-5.12535	2.96988e-07	4.18597e-06
793	Zm00001d018513	74.4614	-1.62479	0.392066	-4.14416	3.41056e-05	0.000309084
794	Zm00001d042988	107.884	-1.62096	0.474102	-3.419	0.00062852	0.00395252
795	Zm00001d010066	3033.56	-1.62006	0.27241	-5.94712	2.72899e-09	5.36468e-08
796	Zm00001d053416	419.656	-1.61649	0.239702	-6.74376	1.54343e-11	4.04665e-10
797	Zm00001d018227	517.693	-1.61541	0.22871	-7.06315	1.6277e-12	4.72265e-11
798	Zm00001d027708	337.889	-1.6145	0.348369	-4.63446	3.57879e-06	4.09067e-05
799	Zm00001d047942	48.0616	-1.61318	0.618817	-2.60688	0.00913722	0.0366804
800	Zm00001d005764	173.739	-1.61208	0.297437	-5.41989	5.9636e-08	9.49072e-07
801	Zm00001d009608	189.545	-1.61061	0.623537	-2.58303	0.00979381	0.0388162
802	Zm00001d018260	795.313	-1.60936	0.309983	-5.19177	2.0831e-07	3.01414e-06
803	Zm00001d005874	743.559	-1.60902	0.295398	-5.44696	5.12375e-08	8.27814e-07
804	Zm00001d003648	3641.27	-1.60751	0.264767	-6.07139	1.26805e-09	2.60522e-08
805	Zm00001d038459	1321.3	-1.60666	0.402461	-3.99209	6.54934e-05	0.000548944
806	Zm00001d016885	522.701	-1.60632	0.339892	-4.72598	2.29013e-06	2.7194e-05
807	Zm00001d048315	3320.76	-1.60525	0.186222	-8.6201	6.6895e-18	3.18923e-16
808	Zm00001d025827	633.379	-1.60496	0.261974	-6.12642	8.98771e-10	1.88295e-08
809	Zm00001d043116	53.8132	-1.60473	0.56355	-2.84753	0.00440602	0.020388
810	Zm00001d020937	122.906	-1.60469	0.480644	-3.33862	0.00084195	0.00505125
811	Zm00001d025330	73.0595	-1.60307	0.475716	-3.36981	0.000752207	0.0045906
812	Zm00001d015504	3910.67	-1.60195	0.204931	-7.81701	5.40925e-15	2.01825e-13
813	Zm00001d042259	452.811	-1.60075	0.312733	-5.11857	3.07864e-07	4.31202e-06
814	Zm00001d039918	1376.49	-1.60073	0.251272	-6.37051	1.88402e-10	4.31142e-09
815	Zm00001d035775	330.872	-1.59803	0.340328	-4.69554	2.659e-06	3.11758e-05
816	Zm00001d024016	1317.4	-1.59694	0.282579	-5.65129	1.5925e-08	2.7912e-07
817	Zm00001d053967	978.819	-1.5951	0.246164	-6.47984	9.18196e-11	2.18409e-09
818	Zm00001d005032	423.851	-1.59386	0.346551	-4.5992	4.24124e-06	4.78899e-05
819	Zm00001d010753	98.9202	-1.59385	0.357746	-4.45527	8.37875e-06	8.86004e-05
820	Zm00001d026446	277.997	-1.59238	0.292522	-5.44363	5.22069e-08	8.40433e-07
821	Zm00001d030282	1724.95	-1.5921	0.361457	-4.40467	1.05944e-05	0.000109386
822	Zm00001d048686	753.022	-1.59197	0.215511	-7.38696	1.50222e-13	4.87188e-12
823	Zm00001d044132	217.328	-1.59188	0.322574	-4.93493	8.018e-07	1.04925e-05
824	Zm00001d009587	519.685	-1.59172	0.295868	-5.37984	7.45531e-08	1.16568e-06
825	Zm00001d006461	5547.05	-1.58928	0.186864	-8.50499	1.81604e-17	8.33734e-16
826	Zm00001d002589	407.581	-1.58838	0.332717	-4.77397	1.80631e-06	2.19512e-05
827	Zm00001d030253	409.252	-1.58722	0.253412	-6.26338	3.76732e-10	8.29778e-09
828	Zm00001d021163	104.434	-1.58605	0.446861	-3.54932	0.000386231	0.00261297
829	Zm00001d003039	183.715	-1.58536	0.350719	-4.52031	6.17483e-06	6.72719e-05
830	ZeamMp044	93.7158	-1.58527	0.468942	-3.38054	0.000723447	0.00445161
831	Zm00001d012394	390.181	-1.58371	0.334166	-4.7393	2.14458e-06	2.56729e-05
832	Zm00001d029049	811.839	-1.58343	0.345066	-4.58876	4.45884e-06	5.00935e-05
833	Zm00001d023779	493.127	-1.58188	0.289177	-5.47029	4.49303e-08	7.33347e-07
834	Zm00001d010558	282.45	-1.58163	0.340983	-4.63844	3.51047e-06	4.01669e-05
835	Zm00001d012061	5278.43	-1.58074	0.263996	-5.98775	2.12767e-09	4.26146e-08
836	Zm00001d006591	345.957	-1.5806	0.411362	-3.84237	0.000121854	0.000955646
837	Zm00001d006262	187.743	-1.5804	0.344517	-4.58729	4.49027e-06	5.03959e-05
838	Zm00001d040080	35.0332	-1.57881	0.575368	-2.744	0.0060696	0.0264398
839	Zm00001d029313	81.9498	-1.57836	0.465961	-3.38733	0.000705769	0.00435967
840	Zm00001d022210	83.1165	-1.57821	0.459574	-3.43408	0.000594572	0.0037849
841	Zm00001d011500	4039.19	-1.57618	0.265087	-5.94588	2.74973e-09	5.40069e-08
842	Zm00001d013958	113.882	-1.57446	0.415233	-3.79174	0.000149597	0.00114269
843	Zm00001d006145	30.5644	-1.57444	0.605185	-2.60159	0.00927933	0.0371907
844	Zm00001d006856	1596.07	-1.57159	0.483519	-3.25031	0.00115281	0.00656327
845	Zm00001d040793	249.573	-1.57024	0.343831	-4.5669	4.94995e-06	5.50839e-05
846	Zm00001d048837	253.801	-1.56964	0.343318	-4.57197	4.83166e-06	5.3902e-05
847	Zm00001d052063	508.975	-1.56851	0.309804	-5.06291	4.12903e-07	5.6589e-06
848	Zm00001d010211	1716.15	-1.56799	0.296585	-5.2868	1.24472e-07	1.87396e-06
849	Zm00001d029560	900.338	-1.56694	0.220682	-7.10046	1.24345e-12	3.6505e-11
850	Zm00001d043705	768.59	-1.56487	0.234539	-6.67209	2.5218e-11	6.4823e-10
851	Zm00001d022111	1587.51	-1.5642	0.194585	-8.03862	9.08569e-16	3.6592e-14
852	Zm00001d026382	456.961	-1.56413	0.494798	-3.16114	0.00157152	0.00853966
853	Zm00001d047283	7458.08	-1.56406	0.27415	-5.70515	1.1624e-08	2.08484e-07
854	Zm00001d017866	1190.09	-1.56312	0.23021	-6.78998	1.12145e-11	3.00383e-10
855	Zm00001d042277	127.87	-1.55756	0.384615	-4.04966	5.12913e-05	0.000442471
856	Zm00001d000143	2519.56	-1.55307	0.237101	-6.55025	5.74397e-11	1.41896e-09
857	Zm00001d017897	1191.8	-1.55307	0.236731	-6.56046	5.3641e-11	1.33044e-09
858	Zm00001d041824	188.385	-1.55195	0.337179	-4.60276	4.16931e-06	4.71255e-05
859	Zm00001d030561	698.353	-1.55069	0.249098	-6.22519	4.80964e-10	1.04491e-08
860	Zm00001d008919	1751.62	-1.54951	0.282058	-5.4936	3.93816e-08	6.50371e-07
861	Zm00001d007686	94.4027	-1.5478	0.520862	-2.97162	0.0029623	0.0146163
862	Zm00001d039230	70.349	-1.54648	0.488114	-3.16827	0.00153347	0.00836749
863	Zm00001d051553	1282.5	-1.54601	0.201394	-7.67658	1.63398e-14	5.78689e-13
864	Zm00001d043126	1704.52	-1.5451	0.383604	-4.02785	5.62885e-05	0.000479538
865	Zm00001d002052	2882.31	-1.543	0.370511	-4.16451	3.12025e-05	0.000285793
866	Zm00001d018122	92.7857	-1.54295	0.431241	-3.57794	0.000346312	0.00237386
867	Zm00001d045393	774.644	-1.54049	0.285141	-5.40256	6.56979e-08	1.03667e-06
868	Zm00001d051746	1414.28	-1.53986	0.308414	-4.99284	5.94981e-07	7.95058e-06
869	Zm00001d053586	5397.27	-1.53748	0.306012	-5.02423	5.0545e-07	6.82663e-06
870	Zm00001d045295	289.108	-1.5372	0.275547	-5.57872	2.42292e-08	4.16488e-07
871	Zm00001d013065	3291.66	-1.53696	0.193972	-7.92361	2.30712e-15	8.93687e-14
872	Zm00001d035605	273.886	-1.53416	0.390711	-3.92658	8.61621e-05	0.000702649
873	Zm00001d043924	247.078	-1.53361	0.535288	-2.86502	0.00416987	0.0194227
874	Zm00001d027542	1781.76	-1.53163	0.236831	-6.4672	9.98357e-11	2.35968e-09
875	Zm00001d011687	591.92	-1.53032	0.423593	-3.61271	0.000303017	0.00211874
876	Zm00001d045544	10946.4	-1.5299	0.238954	-6.40248	1.52871e-10	3.54138e-09
877	Zm00001d054012	699.168	-1.52974	0.247813	-6.17296	6.70247e-10	1.43243e-08
878	Zm00001d050908	58.2785	-1.52832	0.514467	-2.97068	0.00297138	0.0146449
879	Zm00001d022240	2734.3	-1.52754	0.275846	-5.53764	3.06577e-08	5.16253e-07
880	Zm00001d027888	264.55	-1.52737	0.379113	-4.02881	5.60596e-05	0.000478109
881	Zm00001d020540	568.71	-1.52649	0.352419	-4.33145	1.4813e-05	0.000147089
882	Zm00001d028670	242.964	-1.52369	0.313104	-4.8664	1.13651e-06	1.44407e-05
883	Zm00001d049872	1088.27	-1.52277	0.317387	-4.79784	1.60384e-06	1.97597e-05
884	Zm00001d028047	709.757	-1.52206	0.325451	-4.67678	2.91412e-06	3.37941e-05
885	Zm00001d048957	692.238	-1.52084	0.254984	-5.96446	2.45437e-09	4.86341e-08
886	Zm00001d019477	57.8998	-1.51874	0.559563	-2.71415	0.00664457	0.0284775
887	Zm00001d051306	8341.01	-1.51411	0.27171	-5.57253	2.51071e-08	4.30253e-07
888	Zm00001d002682	565.108	-1.51345	0.225266	-6.7185	1.83608e-11	4.77466e-10
889	Zm00001d039971	2456.97	-1.51295	0.21588	-7.00828	2.41264e-12	6.86617e-11
890	Zm00001d013529	200.62	-1.51122	0.338883	-4.45942	8.21825e-06	8.71614e-05
891	Zm00001d026303	466.318	-1.51086	0.342538	-4.41079	1.02996e-05	0.000106836
892	Zm00001d018543	53.2244	-1.5089	0.584624	-2.58097	0.00985233	0.0389899
893	Zm00001d005114	1371.71	-1.50846	0.365241	-4.13005	3.62692e-05	0.00032578
894	Zm00001d010885	402.637	-1.5072	0.417866	-3.6069	0.000309881	0.00215795
895	Zm00001d030862	61.6774	-1.50666	0.599629	-2.51266	0.0119825	0.0455613
896	Zm00001d021943	1113.35	-1.50557	0.252419	-5.96456	2.45289e-09	4.86341e-08
897	Zm00001d027757	275.645	-1.50539	0.35011	-4.29977	1.70976e-05	0.000167537
898	Zm00001d045021	2384.98	-1.50455	0.306411	-4.91023	9.09709e-07	1.18146e-05
899	Zm00001d018708	63.7058	-1.50354	0.588201	-2.55616	0.0105834	0.0412248
900	Zm00001d024005	64.6123	-1.5032	0.456541	-3.29259	0.000992705	0.00579368
901	Zm00001d009964	113.935	-1.50312	0.348699	-4.31066	1.62765e-05	0.000160124
902	Zm00001d035922	2886.25	-1.50161	0.203512	-7.37847	1.60114e-13	5.17747e-12
903	Zm00001d020899	46.5048	-1.49958	0.552214	-2.71557	0.00661609	0.0283718
904	Zm00001d047503	7481.2	-1.4995	0.202697	-7.39773	1.38537e-13	4.51906e-12
905	Zm00001d044253	1405.78	-1.49935	0.25502	-5.87933	4.1193e-09	7.80063e-08
906	Zm00001d049259	262.388	-1.4976	0.296254	-5.05512	4.30111e-07	5.87669e-06
907	Zm00001d038017	399.102	-1.49731	0.354341	-4.22563	2.38275e-05	0.000224321
908	Zm00001d027659	1420.08	-1.49519	0.233538	-6.40235	1.53007e-10	3.54138e-09
909	Zm00001d045785	258.027	-1.49466	0.28743	-5.20009	1.99187e-07	2.88776e-06
910	Zm00001d023022	60.946	-1.49462	0.492846	-3.03264	0.00242427	0.0124117
911	Zm00001d022147	521.427	-1.49424	0.294601	-5.0721	3.93455e-07	5.40897e-06
912	Zm00001d007788	40.6287	-1.4942	0.57459	-2.60046	0.00930997	0.0372666
913	Zm00001d028835	277.445	-1.49382	0.392424	-3.80665	0.00014086	0.00108412
914	Zm00001d013519	537.735	-1.49265	0.221399	-6.74188	1.56352e-11	4.08972e-10
915	Zm00001d025899	285.04	-1.49229	0.341884	-4.3649	1.27181e-05	0.00012875
916	Zm00001d025964	191.272	-1.49209	0.403728	-3.69577	0.000219219	0.0016021
917	Zm00001d005661	187.645	-1.4913	0.409802	-3.63908	0.000273611	0.00193681
918	Zm00001d003310	1044.84	-1.49128	0.3218	-4.63419	3.58337e-06	4.09381e-05
919	Zm00001d033684	1264.63	-1.49063	0.228994	-6.50945	7.54243e-11	1.82084e-09
920	Zm00001d019102	109.07	-1.4903	0.342326	-4.35345	1.34011e-05	0.000135012
921	Zm00001d030815	48.7294	-1.48722	0.532174	-2.79462	0.00519612	0.0233177
922	Zm00001d033402	134.974	-1.48703	0.380316	-3.90998	9.23027e-05	0.000746721
923	Zm00001d008983	359.917	-1.48322	0.303994	-4.87911	1.06568e-06	1.36338e-05
924	Zm00001d041772	516.542	-1.48155	0.228655	-6.47943	9.20728e-11	2.18778e-09
925	Zm00001d043787	804.286	-1.48068	0.325455	-4.54956	5.3757e-06	5.92895e-05
926	Zm00001d013906	471.247	-1.47996	0.302611	-4.89064	1.00508e-06	1.29626e-05
927	Zm00001d052855	49040.8	-1.47942	0.283302	-5.22206	1.76946e-07	2.59909e-06
928	Zm00001d049121	174.903	-1.47941	0.376345	-3.931	8.45918e-05	0.00069136
929	Zm00001d006845	1272.73	-1.47885	0.312981	-4.72506	2.30047e-06	2.73022e-05
930	Zm00001d049384	174.152	-1.47812	0.35535	-4.15962	3.18782e-05	0.000291383
931	Zm00001d013858	971.915	-1.47634	0.262974	-5.61403	1.97672e-08	3.43494e-07
932	zma-MIR159a	276.558	-1.47537	0.273829	-5.38792	7.12779e-08	1.11761e-06
933	Zm00001d032548	268.572	-1.47524	0.345168	-4.27397	1.9202e-05	0.00018513
934	Zm00001d031995	1554	-1.47506	0.231822	-6.3629	1.97977e-10	4.51201e-09
935	Zm00001d010705	1742.29	-1.47477	0.218877	-6.73789	1.60708e-11	4.19874e-10
936	Zm00001d012464	168.957	-1.47296	0.31182	-4.72376	2.31529e-06	2.74488e-05
937	Zm00001d045435	4449.65	-1.47275	0.295365	-4.98621	6.15762e-07	8.20722e-06
938	Zm00001d002680	993.405	-1.47097	0.243692	-6.03618	1.57805e-09	3.21841e-08
939	Zm00001d020863	1334.29	-1.47086	0.232558	-6.32471	2.53706e-10	5.69485e-09
940	Zm00001d018868	343.709	-1.47019	0.355354	-4.13726	3.51479e-05	0.000317284
941	Zm00001d052840	11366.4	-1.46882	0.276745	-5.30749	1.11146e-07	1.6893e-06
942	Zm00001d052594	402.564	-1.46789	0.384138	-3.82125	0.000132776	0.00103043
943	Zm00001d047632	638.16	-1.46706	0.353773	-4.14689	3.37025e-05	0.000305803
944	Zm00001d007802	2559.01	-1.46699	0.193016	-7.60033	2.9537e-14	1.02493e-12
945	Zm00001d043581	3129.35	-1.46532	0.237622	-6.1666	6.97744e-10	1.48977e-08
946	Zm00001d035569	356.235	-1.46515	0.351764	-4.16516	3.11141e-05	0.0002851
947	Zm00001d032837	271.979	-1.46511	0.356202	-4.11314	3.90307e-05	0.000347923
948	Zm00001d017422	119.186	-1.46489	0.576837	-2.53951	0.0111007	0.0428607
949	Zm00001d030464	113.259	-1.46432	0.428671	-3.41595	0.000635611	0.00398924
950	Zm00001d028368	1095.27	-1.464	0.243678	-6.00791	1.87935e-09	3.79133e-08
951	Zm00001d047404	976.551	-1.46397	0.206659	-7.084	1.40052e-12	4.09011e-11
952	Zm00001d003380	8774.06	-1.46354	0.346523	-4.22351	2.40528e-05	0.000226155
953	Zm00001d027551	76.5598	-1.46343	0.485603	-3.01364	0.00258133	0.0130739
954	Zm00001d041793	697.151	-1.46218	0.28685	-5.09739	3.44376e-07	4.78737e-06
955	Zm00001d047178	1933.04	-1.46156	0.290697	-5.02777	4.96211e-07	6.70997e-06
956	Zm00001d037983	1016.03	-1.45964	0.278123	-5.24816	1.53627e-07	2.27907e-06
957	Zm00001d011944	101.45	-1.45742	0.422759	-3.4474	0.000566009	0.00362897
958	Zm00001d002982	62.9094	-1.45739	0.545497	-2.67167	0.00754746	0.0315236
959	Zm00001d048859	331.231	-1.45699	0.330146	-4.41315	1.01875e-05	0.000105723
960	Zm00001d024041	5696.46	-1.45669	0.288775	-5.04436	4.55042e-07	6.19835e-06
961	Zm00001d044302	259.683	-1.45636	0.382696	-3.80552	0.000141508	0.00108836
962	Zm00001d043447	90.2862	-1.45444	0.419301	-3.46871	0.000522955	0.0033723
963	Zm00001d050266	155.185	-1.45299	0.509974	-2.84914	0.00438379	0.0203012
964	Zm00001d046385	629.803	-1.45268	0.219313	-6.62378	3.50136e-11	8.84737e-10
965	Zm00001d016477	288.598	-1.45207	0.316675	-4.58537	4.53192e-06	5.07867e-05
966	Zm00001d036055	2509.59	-1.45205	0.339093	-4.28217	1.8508e-05	0.000179544
967	Zm00001d017831	806.523	-1.4517	0.241515	-6.01082	1.84593e-09	3.73064e-08
968	Zm00001d039691	214.403	-1.45134	0.372614	-3.89503	9.81857e-05	0.000788596
969	Zm00001d027815	197.816	-1.44978	0.467189	-3.10319	0.00191446	0.0101534
970	Zm00001d022073	57.8252	-1.44964	0.449888	-3.22222	0.00127201	0.00713578
971	Zm00001d037318	488.12	-1.44843	0.256064	-5.6565	1.54492e-08	2.71633e-07
972	Zm00001d005110	3450.72	-1.4484	0.244653	-5.92023	3.21488e-09	6.24572e-08
973	Zm00001d043539	1283.79	-1.4476	0.240269	-6.02494	1.69177e-09	3.43152e-08
974	Zm00001d040988	2081.69	-1.44708	0.430904	-3.35823	0.000784421	0.00475339
975	Zm00001d015605	1535.6	-1.44578	0.292123	-4.94922	7.45109e-07	9.83138e-06
976	Zm00001d029490	6476.73	-1.44476	0.24454	-5.90808	3.46117e-09	6.6862e-08
977	Zm00001d045478	48151.7	-1.44305	0.370193	-3.8981	9.69501e-05	0.000779513
978	Zm00001d013135	478.28	-1.44261	0.307917	-4.68508	2.79857e-06	3.26578e-05
979	Zm00001d026677	983.039	-1.44252	0.314061	-4.59314	4.3663e-06	4.91777e-05
980	Zm00001d008454	809.25	-1.43976	0.24438	-5.89149	3.82725e-09	7.30484e-08
981	Zm00001d008720	1272.81	-1.4396	0.227217	-6.33577	2.36154e-10	5.31693e-09
982	Zm00001d048982	391.275	-1.43883	0.336336	-4.27797	1.88609e-05	0.00018257
983	Zm00001d027472	320.981	-1.43626	0.456832	-3.14395	0.00166685	0.00899197
984	Zm00001d026427	456.836	-1.43596	0.308807	-4.65002	3.31906e-06	3.81541e-05
985	Zm00001d042634	1214.76	-1.43468	0.347594	-4.12746	3.66795e-05	0.000328936
986	Zm00001d003149	374.893	-1.43449	0.302943	-4.7352	2.1884e-06	2.6125e-05
987	Zm00001d050690	68.8745	-1.4331	0.455373	-3.14708	0.00164908	0.00891332
988	Zm00001d020538	641.181	-1.43285	0.42721	-3.35397	0.000796619	0.00481685
989	Zm00001d042256	475.838	-1.43218	0.329179	-4.35076	1.35667e-05	0.000136536
990	Zm00001d012479	215.686	-1.43217	0.535424	-2.67483	0.00747681	0.0312988
991	Zm00001d011401	3628.97	-1.43174	0.194065	-7.37761	1.61154e-13	5.20357e-12
992	Zm00001d031840	3733.6	-1.43145	0.294225	-4.86514	1.14376e-06	1.44997e-05
993	Zm00001d017495	76.9337	-1.43141	0.516867	-2.7694	0.00561604	0.0248523
994	Zm00001d018788	1290.88	-1.43093	0.30663	-4.66665	3.06152e-06	3.53747e-05
995	Zm00001d046468	1290.37	-1.42984	0.341325	-4.18907	2.80096e-05	0.000259638
996	Zm00001d026331	5906.52	-1.42965	0.241307	-5.92463	3.13005e-09	6.09937e-08
997	Zm00001d011035	32.1974	-1.4282	0.567655	-2.51596	0.0118709	0.0452064
998	Zm00001d026608	622.652	-1.4274	0.221088	-6.45626	1.07323e-10	2.52063e-09
999	Zm00001d031463	559.966	-1.42703	0.244465	-5.83736	5.30332e-09	9.90189e-08
1000	Zm00001d023374	56.8786	-1.4269	0.565195	-2.52461	0.0115826	0.0443355
1001	Zm00001d012239	1281.88	-1.42658	0.243228	-5.86519	4.48619e-09	8.44691e-08
1002	Zm00001d018797	1911.71	-1.42581	0.375585	-3.79623	0.000146915	0.00112413
1003	Zm00001d022218	58.8	-1.42446	0.438042	-3.25188	0.00114646	0.00653379
1004	Zm00001d025517	1611.62	-1.42411	0.219937	-6.47507	9.47705e-11	2.24471e-09
1005	Zm00001d048718	11795.1	-1.42407	0.193779	-7.34892	1.99815e-13	6.39637e-12
1006	Zm00001d033082	531.858	-1.42378	0.269677	-5.27956	1.29492e-07	1.94692e-06
1007	Zm00001d039932	109.245	-1.42277	0.433621	-3.28115	0.00103386	0.00599467
1008	Zm00001d032721	80.686	-1.42255	0.378476	-3.75861	0.000170857	0.00128106
1009	Zm00001d043390	91.3374	-1.42152	0.498377	-2.85229	0.00434055	0.0201302
1010	Zm00001d047182	108.662	-1.42124	0.360001	-3.94787	7.88509e-05	0.000648478
1011	Zm00001d021774	113.117	-1.42032	0.51724	-2.74596	0.00603334	0.0263488
1012	Zm00001d005964	346.714	-1.41895	0.276566	-5.13062	2.88784e-07	4.08065e-06
1013	Zm00001d026405	994.592	-1.41875	0.238357	-5.95221	2.64549e-09	5.21893e-08
1014	Zm00001d033020	23718.4	-1.41862	0.205685	-6.89706	5.30879e-12	1.46415e-10
1015	Zm00001d043550	197.041	-1.41542	0.406841	-3.47904	0.000503207	0.00327313
1016	Zm00001d019100	178.094	-1.4153	0.51068	-2.7714	0.00558159	0.0247342
1017	Zm00001d012245	2632.29	-1.41516	0.239558	-5.90737	3.47617e-09	6.70357e-08
1018	Zm00001d029590	1068.6	-1.41479	0.249956	-5.66014	1.51246e-08	2.66346e-07
1019	Zm00001d005532	369.506	-1.41463	0.332396	-4.25586	2.08244e-05	0.000198902
1020	Zm00001d006417	124.398	-1.41325	0.325832	-4.33737	1.44199e-05	0.000143568
1021	Zm00001d025816	2528.38	-1.41243	0.322427	-4.38062	1.18344e-05	0.000120839
1022	Zm00001d013702	265.645	-1.41241	0.311994	-4.52706	5.98101e-06	6.54479e-05
1023	Zm00001d032688	152.385	-1.41214	0.379752	-3.71858	0.000200348	0.00147725
1024	Zm00001d025957	74.576	-1.41177	0.50846	-2.77655	0.00549384	0.024418
1025	Zm00001d004798	268.719	-1.41167	0.338569	-4.16953	3.05229e-05	0.000280489
1026	Zm00001d037778	362.906	-1.41157	0.33319	-4.23652	2.27009e-05	0.000214801
1027	Zm00001d003067	332.272	-1.41082	0.403708	-3.49467	0.000474657	0.00312221
1028	Zm00001d031833	8761.95	-1.40981	0.300831	-4.6864	2.78055e-06	3.24645e-05
1029	Zm00001d034715	448.736	-1.40921	0.334692	-4.21048	2.54831e-05	0.000237998
1030	Zm00001d036709	680.312	-1.40914	0.262461	-5.36894	7.91999e-08	1.23229e-06
1031	Zm00001d047395	899.212	-1.40901	0.319642	-4.40808	1.0429e-05	0.000107927
1032	Zm00001d015215	111.984	-1.40757	0.434157	-3.24208	0.00118663	0.00671654
1033	Zm00001d045420	260.65	-1.40658	0.314326	-4.4749	7.64488e-06	8.18094e-05
1034	Zm00001d045778	127.862	-1.40641	0.472787	-2.97473	0.00293248	0.0145109
1035	Zm00001d037115	2893.73	-1.40626	0.273351	-5.14454	2.68177e-07	3.81119e-06
1036	Zm00001d026629	571.077	-1.40589	0.274148	-5.12821	2.92504e-07	4.12537e-06
1037	Zm00001d037684	769.448	-1.40486	0.33883	-4.14621	3.38027e-05	0.000306588
1038	Zm00001d026435	998.065	-1.40403	0.28537	-4.92004	8.65276e-07	1.12835e-05
1039	Zm00001d001804	2322.33	-1.40245	0.19331	-7.25494	4.01844e-13	1.25048e-11
1040	Zm00001d051817	178.452	-1.40225	0.402654	-3.48251	0.000496734	0.00324068
1041	Zm00001d052393	1682.91	-1.40025	0.332869	-4.2066	2.59238e-05	0.000242013
1042	Zm00001d008842	269.991	-1.40019	0.371028	-3.77381	0.000160775	0.00121395
1043	Zm00001d016382	5367.66	-1.39943	0.310016	-4.51405	6.35997e-06	6.91876e-05
1044	Zm00001d038539	236.006	-1.39941	0.308436	-4.5371	5.70327e-06	6.26545e-05
1045	Zm00001d038809	3257.83	-1.39909	0.209985	-6.66283	2.68598e-11	6.87266e-10
1046	Zm00001d052882	216.735	-1.39888	0.407208	-3.4353	0.000591887	0.00377212
1047	Zm00001d009702	3028.62	-1.39853	0.19332	-7.2343	4.67935e-13	1.44807e-11
1048	Zm00001d028975	472.989	-1.39807	0.227376	-6.1487	7.81226e-10	1.6522e-08
1049	Zm00001d010646	4728.67	-1.39742	0.257741	-5.42179	5.90045e-08	9.40363e-07
1050	Zm00001d011152	1362.2	-1.39715	0.329202	-4.24404	2.19531e-05	0.000208433
1051	Zm00001d032284	348.546	-1.39522	0.43348	-3.21866	0.00128792	0.00720745
1052	Zm00001d046823	178.864	-1.39489	0.389819	-3.57831	0.000345826	0.00237126
1053	Zm00001d051681	992.279	-1.39379	0.291148	-4.7872	1.69124e-06	2.07154e-05
1054	Zm00001d032204	237.493	-1.39238	0.374933	-3.71367	0.000204277	0.00150077
1055	Zm00001d025665	383.301	-1.3922	0.318371	-4.37289	1.22614e-05	0.000124636
1056	Zm00001d003151	738.702	-1.39077	0.222961	-6.23774	4.43937e-10	9.69189e-09
1057	Zm00001d012445	164.304	-1.39071	0.325019	-4.27885	1.87865e-05	0.000182008
1058	Zm00001d019510	295.545	-1.39061	0.256635	-5.41864	6.00538e-08	9.54359e-07
1059	Zm00001d026786	1491.29	-1.38734	0.297492	-4.66344	3.10968e-06	3.59126e-05
1060	Zm00001d002137	3403.67	-1.38619	0.255387	-5.42782	5.7045e-08	9.13703e-07
1061	Zm00001d053852	2210.29	-1.38618	0.210285	-6.59189	4.34254e-11	1.08744e-09
1062	Zm00001d011368	78.9854	-1.38496	0.518997	-2.66854	0.00761814	0.0317475
1063	Zm00001d012755	5282.41	-1.38483	0.370426	-3.73847	0.000185144	0.00137606
1064	Zm00001d009600	2826.19	-1.384	0.319596	-4.33048	1.48782e-05	0.000147604
1065	Zm00001d045427	401.265	-1.38326	0.375584	-3.68295	0.000230552	0.0016756
1066	Zm00001d012894	149.683	-1.38119	0.379471	-3.63978	0.000272874	0.00193311
1067	Zm00001d034448	272.574	-1.3811	0.486898	-2.83653	0.00456063	0.0209333
1068	Zm00001d046839	123.434	-1.38048	0.366015	-3.77164	0.000162178	0.00122371
1069	Zm00001d029091	773.059	-1.3798	0.282266	-4.88829	1.01716e-06	1.31033e-05
1070	Zm00001d011842	226.909	-1.3788	0.429611	-3.20942	0.00133002	0.00741327
1071	Zm00001d026026	809.625	-1.37739	0.286714	-4.80407	1.55474e-06	1.91972e-05
1072	ENSRNA049997483	249.917	-1.37699	0.286036	-4.81406	1.47892e-06	1.83422e-05
1073	Zm00001d036280	1888.96	-1.3766	0.220041	-6.25608	3.94779e-10	8.66107e-09
1074	Zm00001d011941	2985.1	-1.37556	0.231812	-5.93393	2.95759e-09	5.77527e-08
1075	Zm00001d033670	1604.56	-1.37478	0.223418	-6.1534	7.58414e-10	1.60853e-08
1076	Zm00001d049511	61.4444	-1.37124	0.541905	-2.5304	0.0113934	0.0437461
1077	Zm00001d002642	1406.96	-1.37019	0.201451	-6.80162	1.03451e-11	2.77762e-10
1078	Zm00001d011064	171.018	-1.37004	0.425713	-3.21823	0.00128986	0.00720923
1079	Zm00001d012307	5348.18	-1.36697	0.279967	-4.8826	1.04697e-06	1.34271e-05
1080	Zm00001d036847	127.764	-1.36538	0.420075	-3.25033	0.00115272	0.00656327
1081	Zm00001d046363	1571.28	-1.36521	0.240914	-5.66678	1.4551e-08	2.57055e-07
1082	Zm00001d010079	227.024	-1.36471	0.519231	-2.62832	0.00858082	0.0348798
1083	Zm00001d007790	41.2161	-1.36462	0.513736	-2.65626	0.0079012	0.0326829
1084	Zm00001d040051	2431.45	-1.36362	0.310763	-4.38799	1.14403e-05	0.00011709
1085	Zm00001d028406	164.08	-1.36264	0.357501	-3.81157	0.000138088	0.00106463
1086	Zm00001d037946	974.246	-1.36227	0.380885	-3.57659	0.000348111	0.00238399
1087	Zm00001d041553	18238.6	-1.35945	0.40258	-3.37685	0.000733215	0.00449684
1088	Zm00001d052164	538.336	-1.35929	0.373459	-3.63974	0.000272916	0.00193311
1089	Zm00001d033378	6061.75	-1.3578	0.323336	-4.19936	2.67666e-05	0.000249464
1090	Zm00001d046831	1576.83	-1.35776	0.200382	-6.77587	1.23656e-11	3.28064e-10
1091	Zm00001d015723	293.021	-1.35639	0.306744	-4.4219	9.78361e-06	0.000101768
1092	Zm00001d005685	61.0957	-1.35597	0.504407	-2.68825	0.0071827	0.0304099
1093	Zm00001d014669	7480.18	-1.3528	0.226323	-5.9773	2.26868e-09	4.52358e-08
1094	Zm00001d047931	342.266	-1.35219	0.301897	-4.47897	7.5004e-06	8.04176e-05
1095	Zm00001d005627	2106.08	-1.35213	0.211377	-6.39675	1.58719e-10	3.65841e-09
1096	Zm00001d050948	65.9556	-1.35157	0.521508	-2.59166	0.00955144	0.0380489
1097	Zm00001d013035	885.782	-1.34829	0.280656	-4.80408	1.55466e-06	1.91972e-05
1098	Zm00001d036025	1303.08	-1.34769	0.341024	-3.95191	7.75309e-05	0.000638564
1099	Zm00001d006368	1009.56	-1.34516	0.257176	-5.2305	1.69052e-07	2.49298e-06
1100	Zm00001d041471	2099.61	-1.3449	0.273839	-4.91128	9.04832e-07	1.17581e-05
1101	Zm00001d023499	346.277	-1.34454	0.278151	-4.83383	1.33929e-06	1.67502e-05
1102	Zm00001d036437	450.142	-1.34385	0.223428	-6.01471	1.80213e-09	3.64544e-08
1103	Zm00001d011746	462.894	-1.34358	0.340695	-3.94365	8.02522e-05	0.000659031
1104	Zm00001d006861	1936.61	-1.34339	0.335986	-3.99837	6.37815e-05	0.000536611
1105	Zm00001d019844	56.4841	-1.34305	0.485331	-2.7673	0.00565234	0.0249914
1106	Zm00001d051246	238.267	-1.34224	0.303156	-4.42754	9.53121e-06	9.94205e-05
1107	Zm00001d017237	104.934	-1.34221	0.417043	-3.21841	0.00128905	0.00720923
1108	Zm00001d011819	663.023	-1.34197	0.24143	-5.55843	2.72217e-08	4.64705e-07
1109	Zm00001d016406	6065.42	-1.3413	0.304922	-4.39884	1.08832e-05	0.000112005
1110	Zm00001d008229	456.225	-1.3412	0.305548	-4.3895	1.13612e-05	0.000116394
1111	Zm00001d033475	972.408	-1.33993	0.313871	-4.26904	1.96313e-05	0.000189043
1112	Zm00001d043314	2217.76	-1.33923	0.240919	-5.55886	2.71537e-08	4.639e-07
1113	Zm00001d037744	1896.63	-1.33874	0.232225	-5.76483	8.17424e-09	1.4925e-07
1114	Zm00001d016764	832.435	-1.33749	0.465745	-2.87172	0.00408251	0.0190867
1115	Zm00001d022440	6220.24	-1.33719	0.191462	-6.98413	2.86631e-12	8.09884e-11
1116	Zm00001d029654	4237.28	-1.33719	0.267885	-4.99166	5.98616e-07	7.99301e-06
1117	Zm00001d030950	931.829	-1.33709	0.272866	-4.90017	9.57549e-07	1.23854e-05
1118	Zm00001d013554	1509.35	-1.33613	0.297364	-4.49326	7.01425e-06	7.55683e-05
1119	Zm00001d012301	506.299	-1.33612	0.293678	-4.54962	5.37438e-06	5.92895e-05
1120	Zm00001d010452	478.232	-1.3361	0.261643	-5.10657	3.28059e-07	4.5805e-06
1121	Zm00001d026551	293.319	-1.33571	0.301143	-4.43547	9.18711e-06	9.61909e-05
1122	Zm00001d012177	781.544	-1.33495	0.240387	-5.55335	2.80248e-08	4.75867e-07
1123	Zm00001d044918	154.752	-1.33472	0.416845	-3.20195	0.00136499	0.00757605
1124	Zm00001d037453	4749.81	-1.33465	0.246034	-5.42463	5.80758e-08	9.28879e-07
1125	Zm00001d032324	131.369	-1.33462	0.427337	-3.1231	0.00178958	0.00955011
[truncated: 2,383 more rows]

## Sheet: D_V9 versus P_V9
Supplemental Dataset 2. List of line-specific differentially expressed genes (D_V9 versus P_V9)
[truncated: 6,690 more rows]

[truncated: 1 more sheets: D_V10 versus P_V10]
