# Supplementary material for: Comparative transcriptome analysis identified candidate genes associated with kernel row number in maize
Source: PeerJ. 2025 Mar 31;13:e19143. doi: 10.7717/peerj.19143 (PMC11967441; doi:10.7717/peerj.19143)
Supplement: Supplemental Information 8 [file peerj-13-19143-s008.xlsx]

## Sheet: KRN-related QTLs
Supplemental Dataset 4. KRN-related QTLs and QTNs
QTL	Chromosome	Start (bp)	End (bp)	Range (bp)	LOD	PVE(%)	Reference
qKRN1.1	1	271130564	277891800	6761236	4.85	1.51	Ma, X.Q. et al (2007)
	1	282900000	303100000	20200000	27.6	18.3	Fei, X. et al. (2022)
	1	283221170	291065619	7844449	14.49	5.07	Ma, X.Q. et al (2007)
	1	293102332	303907729	10805397	8.1	9.4	Cai, L.et al. (2014)
	1	294510000	297100000	2590000	2.75136	4.6018	Zhang, X.et al (2020)
	1	295585779	303283055	7697276	5.28	5.15	Wenkang Chen et al. (2022)
qKRN2.1	2	2800000	18000000	15200000	8.9	10	Fei, X. et al. (2022)
	2	3470000	5850000	2380000	4.64	5.59	Zhang, C.et al (2017)
	2	9070000	9740000	670000	5.88	5.59	Zhang, C.et al (2017)
	2	10614197	28746618	18132421	16.89	19.1	Wenkang Chen et al. (2022)
	2	12239612	12914968	675356	6.64	4.84	C. Yang et al. (2015)
	2	15192025	50479641	35287616	13.5	15.7	Cai, L.et al. (2014)
	2	22071419	28258664	6187245	2.8	3.7	Yan, Jb.et al. (2006)
qKRN2.2	2	190962395	208891411	17929016	5.49	5.43	Guo, J.et al. (2011)
	2	194256228	195474884	1218656	11.77	10	Lu, M.et al. (2011)
	2	195474884	205734483	10259599	15.07	13.05	Lu, M.et al. (2011)
qKRN3.1	3	147851216	170148892	22297676	5.69	1.55	Ma, X.Q. et al (2007)
	3	148920000	154780000	5860000	5.46	6.01	Zhang, C.et al (2017)
	3	164250776	181952392	17701616	7.63	6.14	Lu, M.et al. (2011)
qKRN3.2	3	194882312	210465707	15583395	4.4	3	Lu, M.et al. (2011)
	3	203050000	205410000	2360000	3.14224	4.6103	Zhang, X.et al (2020)
qKRN4.1	4	7480000	11140000	3660000	4.91	5.39	Zhang, C.et al (2017)
	4	10672722	44639414	33966692	4.14	3.29	Lu, M.et al. (2011)
	4	38555310	73910872	35355562	8.89	3	Ma, X.Q. et al (2007)
	4	40650000	42010000	1360000	5.14875	7.2225	Zhang, X.et al (2020)
qKRN4.2	4	144347680	178364978	34017298	5.69	4.31	Lu, M.et al. (2011)
	4	147540000	150490000	2950000	8.51683	12.1252	Zhang, X.et al (2020)
	4	154759197	160041575	5282378	10.24	10.78	Wenkang Chen et al. (2022)
	4	159035089	188530131	29495042	21	19.7	Cai, L.et al. (2014)
	4	168280000	172150000	3870000	3.0076	3.8121	Zhang, X.et al (2020)
	4	168622562	181202223	12579661	5.98	12.67	Liu, L. et al (2015)
	4	172721406	192080657	19359251	12.63	18.54	Liu, L. et al (2015)
	4	181202223	204240756	23038533	26.65	26.05	Liu, L. et al (2015)
	4	181202223	204240756	23038533	11.8	18.34	Liu, L. et al (2015)
	4	189138794	239931778	50792984	13.82	20.71	Liu, L. et al (2015)
	4	194258167	204209636	9951469	5.94	1.95	Ma, X.Q. et al (2007)
	4	196500000	214500000	18000000	15.3	11	Fei, X. et al. (2022)
	4	199309320	205048956	5739636	3.91	3.45	Wenkang Chen et al. (2022)
	4	204209635	237006371	32796736	7.51	7.64	Guo, J.et al. (2011)
	4	204209635	235832432	31622797	4.2	5.8	Yan, Jb.et al. (2006)
	4	204240604	241457728	37217124	5.14	4.77	Lu, M.et al. (2011)
	4	204500000	206790000	2290000	3.18133	4.1585	Zhang, X.et al (2020)
	4	230925199	232075085	1149886	8.83	6.2	C. Yang et al. (2015)
	4	238500000	243400000	4900000	12.7	9.5	Fei, X. et al. (2022)
	4	239970000	242200000	2230000	2.55157	3.3552	Zhang, X.et al (2020)
	4	241457728	245469418	4011690	3.53	3.57	Lu, M.et al. (2011)
qKRN5.1	5	1935958	23270067	21334109	3.92	7.31	Liu, L. et al (2015)
	5	6095510	12795068	6699558	5.06	5.35	Guo, J.et al. (2011)
	5	6719312	15627760	8908448	14.49	28.43	Liu, L. et al (2015)
	5	7240861	23270067	16029206	8.51	7.71	Liu, L. et al (2015)
	5	7949729	11811621	3861892	4.75	4.6	Wenkang Chen et al. (2022)
	5	10405239	33202927	22797688	4.25	5.51	Liu, L. et al (2015)
	5	11291370	33202927	21911557	6.35	7.4	Liu, L. et al (2015)
	5	12790000	14160000	1370000	3.60261	5.0311	Zhang, X.et al (2020)
qKRN5.2	5	82115827	146955915	64840088	9.18	9.31	Wenkang Chen et al. (2022)
	5	142583678	155423206	12839528	13.4	3.99	Ma, X.Q. et al (2007)
	5	148760000	157910000	9150000	5.65	7.79	Zhang, C.et al (2017)
qKRN5.3	5	169980000	175450000	5470000	5.48	6.03	Zhang, C.et al (2017)
	5	172824163	184918141	12093978	3.48	2.33	C. Yang et al.(2015)
qKRN5.4	5	203056314	216609871	13553557	3.06	5.48	Liu, L. et al (2015)
	5	203056314	216609871	13553557	5.49	6.71	Liu, L. et al (2015)
	5	213923659	216609871	2686212	3.74	7.79	Liu, L. et al (2015)
	5	213923659	216609871	2686212	2.58	4.11	Liu, L. et al (2015)
qKRN6.1	6	150031758	166027263	15995505	7.4	9.74	Liu, L. et al (2015)
	6	154440000	160580000	6140000	4.57	5.9	Zhang, C.et al (2017)
	6	155081087	157478216	2397129	4.79	4.24	Wenkang Chen et al. (2022)
	6	158521773	168691115	10169342	4.53	9.96	Liu, L. et al (2015)
	6	161410000	162630000	1220000	3.32899	4.6344	Zhang, X.et al (2020)
qKRN7.1	7	138263125	145650361	7387236	4.07	3.57	Wenkang Chen et al. (2022)
	7	139900000	141530000	1630000	4.61021	6.4873	Zhang, X.et al (2020)
	7	140788364	152390489	11602125	22.2	17.86	Lu, M.et al. (2011)
	7	151760000	155010000	3250000	6.18458	8.6042	Zhang, X.et al (2020)
qKRN8.1	8	10680000	17180000	6500000	4.09	5.85	Zhang, C.et al (2017)
	8	16350000	17440000	1090000	4.43865	6.1353	Zhang, X.et al (2020)
	8	19060508	20369219	1308711	18.46	16.39	C. Yang et al. (2015)
qKRN8.2	8	105571945	114095322	8523377	12.81	8.12	C. Yang et al. (2015)
	8	112720000	115500000	2780000	7.18567	10.0655	Zhang, X.et al (2020)
	8	113492959	129743072	16250113	22.9	7.51	Ma, X.Q. et al (2007)
qKRN9.1	9	51718798	112272460	60553662	9.72	2.93	Ma, X.Q. et al (2007)
	9	101700000	110200000	8500000	16.7	13.5	Fei, X. et al. (2022)
	9	110910000	119050000	8140000	4.31487	7.2999	Zhang, X.et al (2020)
qKRN10.1	10	87401618	134353455	46951837	13.95	10.59	Lu, M.et al. (2011)
	10	93611263	146960411	53349148	4.24	15.51	Liu, L. et al (2015)
	10	103653571	134476821	30823250	4.4	4.96	Liu, L. et al (2015)
	10	130520775	147054625	16533850	5.4	9.4	Yan, Jb.et al. (2006)
	10	142891031	146895064	4004033	7.11	2.59	Ma, X.Q. et al (2007)

## Sheet: KRN-related QTNs
Supplemental Dataset 4. KRN-related QTLs and QTNs
KRN-related QTN	Chromosome	Position	Reference genome	Reference
snp47938	1	284756346	B73 RefGen_v4	Liu et al. 2015b
snp55126	2	4280970	B73 RefGen_v4	Liu et al. 2015b
snp54521	3	19238475	B73 RefGen_v4	Liu et al. 2015b
snp17310	3	221806254	B73 RefGen_v4	Liu et al. 2015b
snp52660	3	221806597	B73 RefGen_v4	Liu et al. 2015b
snp45050	4	12331665	B73 RefGen_v4	Liu et al. 2015b
snp18056	4	25775156	B73 RefGen_v4	Liu et al. 2015b
snp18061	4	25984130	B73 RefGen_v4	Liu et al. 2015b
snp18062	4	25998760	B73 RefGen_v4	Liu et al. 2015b
snp18065	4	26003692	B73 RefGen_v4	Liu et al. 2015b
snp19201	4	81910508	B73 RefGen_v4	Liu et al. 2015b
snp19274	4	84841448	B73 RefGen_v4	Liu et al. 2015b
snp21306	4	203191343	B73 RefGen_v4	Liu et al. 2015b
snp21307	4	203241629	B73 RefGen_v4	Liu et al. 2015b
snp21311	4	203248305	B73 RefGen_v4	Liu et al. 2015b
snp51164	4	203545591	B73 RefGen_v4	Liu et al. 2015b
snp51163	4	203612192	B73 RefGen_v4	Liu et al. 2015b
snp21335	4	203909336	B73 RefGen_v4	Liu et al. 2015b
snp56065	4	204239501	B73 RefGen_v4	Liu et al. 2015b
snp54351	4	204240114	B73 RefGen_v4	Liu et al. 2015b
snp21347	4	204466286	B73 RefGen_v4	Liu et al. 2015b
snp42697	4	204772968	B73 RefGen_v4	Liu et al. 2015b
snp43631	4	245033215	B73 RefGen_v4	Liu et al. 2015b
snp25034	5	163059839	B73 RefGen_v4	Liu et al. 2015b
snp1247	6	107401716	B73 RefGen_v4	Liu et al. 2015b
snp41893	6	154923817	B73 RefGen_v4	Liu et al. 2015b
snp51281	6	172037336	B73 RefGen_v4	Liu et al. 2015b
snp36315	9	47613479	B73 RefGen_v4	Liu et al. 2015b
snp36546	9	69080534	B73 RefGen_v4	Liu et al. 2015b
snp38372	10	3606905	B73 RefGen_v4	Liu et al. 2015b
PZE-101035691	1	23612763	B73 RefGen_v4	Zhang et al. 2020
PZE-101043096	1	29612760	B73 RefGen_v4	Zhang et al. 2020
PZE-101117618	1	144859177	B73 RefGen_v4	Zhang et al. 2020
PZE-102114516	2	155305870	B73 RefGen_v4	Zhang et al. 2020
SYN2031	3	227752366	B73 RefGen_v4	Zhang et al. 2020
PZE-104005318	4	1529103	B73 RefGen_v4	Zhang et al. 2020
PZE-104044017	4	66505780	B73 RefGen_v4	Zhang et al. 2020
SYN8062	4	204262353	B73 RefGen_v4	Zhang et al. 2020
PZE-105120851	5	181703344	B73 RefGen_v4	Zhang et al. 2020
SYN18170	8	9191578	B73 RefGen_v4	Zhang et al. 2020
PZE-108060911	8	111732174	B73 RefGen_v4	Zhang et al. 2020
PZE-109020028	9	20172917	B73 RefGen_v4	Zhang et al. 2020
PZE-109033926	9	43915559	B73 RefGen_v4	Zhang et al. 2020
SYN21847	5	214817088	B73 RefGen_v4	Zhang et al. 2017
PZE-105050695	5	44232714	B73 RefGen_v4	Zhang et al. 2017
PZE-105050711	5	44234199	B73 RefGen_v4	Zhang et al. 2017
PE-105050696	5	44233260	B73 RefGen_v4	Zhang et al. 2017
PZE-109055660	9	95681193	B73 RefGen_v4	Zhang et al. 2017
PZE-110091103	10	141121730	B73 RefGen_v4	Zhang et al. 2017
chr3.s_5986383	3	5148784	B73 RefGen_v4	Liu et al. 2020
chr3.s_12884363	3	12152575	B73 RefGen_v4	Liu et al. 2020
chr3.s_188892826	3	191727440	B73 RefGen_v4	Liu et al. 2020
chr4.s_45148136	4	46986772	B73 RefGen_v4	Liu et al. 2020
chr4.s_154715087	4	158250927	B73 RefGen_v4	Liu et al. 2020
chr4.s_162926377	4	166618426	B73 RefGen_v4	Liu et al. 2020
chr4.s_202031604	4	206239348	B73 RefGen_v4	Liu et al. 2020
chr4.s_234671488	4	239327828	B73 RefGen_v4	Liu et al. 2020
chr5.s_12406637	5	12776702	B73 RefGen_v4	Liu et al. 2020
chr5.s_132286889	5	135618751	B73 RefGen_v4	Liu et al. 2020
chr6.s_117235887	6	121042790	B73 RefGen_v4	Liu et al. 2020
chr7.s_3455634	7	3614559	B73 RefGen_v4	Liu et al. 2020
chr10.s_140508956	10	141801421	B73 RefGen_v4	Liu et al. 2020
chr10.s_145627772	10	146966678	B73 RefGen_v4	Liu et al. 2020
SYN24373	1	28227578	B73 RefGen_v4	Zhang et al. 2022
PZE-101231477	1	285469788	B73 RefGen_v4	Zhang et al. 2022
SYN37680	1	292776942	B73 RefGen_v4	Zhang et al. 2022
PZE-103102170	3	164111529	B73 RefGen_v4	Zhang et al. 2022
PZE-104126741	4	209501522	B73 RefGen_v4	Zhang et al. 2022
SYN38865	5	218173582	B73 RefGen_v4	Zhang et al. 2022
PZB00379.3	9	26822923	B73 RefGen_v4	Zhang et al. 2022
PZE-109016273	9	16082353	B73 RefGen_v4	Zhang et al. 2022
PZE-109101938	9	148903396	B73 RefGen_v4	Zhang et al. 2022
chr1-296366056	1	296366056	B73 RefGen_v4	Li et al. 2018
chrl-298535881	l	298535881	B73 RefGen_v4	Li et al. 2018
chr3-44151146	3	44151146	B73 RefGen_v4	Li et al. 2018
chr3-128397233	3	128397233	B73 RefGen_v4	Li et al. 2018
chr6-87781950	6	87781950	B73 RefGen_v4	Li et al. 2018
chr10-63066339	10	63066339	B73 RefGen_v4	Li et al. 2018
chr4-190080689	4	190080689	B73 RefGen_v4	Li et al. 2018
PZE-106000108	6	381329	B73 RefGen_v4	An et al. 2020
PZE-106000242	6	640000	B73 RefGen_v4	An et al. 2020
PZE-109000357	9	687597	B73 RefGen_v4	An et al. 2020
PZE-104000308	4	818432	B73 RefGen_v4	An et al. 2020
PZE-104000439	4	936010	B73 RefGen_v4	An et al. 2020
PZE-104000566	4	1002532	B73 RefGen_v4	An et al. 2020
SYN1064	4	3697144	B73 RefGen_v4	An et al. 2020
SYN4471	10	3746630	B73 RefGen_v4	An et al. 2020
PZE-105011866	5	5319802	B73 RefGen_v4	An et al. 2020
PZA00089.3	5	5394811	B73 RefGen_v4	An et al. 2020
SYN12682	5	5495031	B73 RefGen_v4	An et al. 2020
PUT-163a-18172180-1378	3	5907715	B73 RefGen_v4	An et al. 2020
PUT-163a-148972919-653	2	6564148	B73 RefGen_v4	An et al. 2020
SYN5742	3	7076298	B73 RefGen_v4	An et al. 2020
PZE-103015347	3	7225821	B73 RefGen_v4	An et al. 2020
SYN19801	4	8067241	B73 RefGen_v4	An et al. 2020
PZE-104010371	4	8251945	B73 RefGen_v4	An et al. 2020
PZE-103016418	3	8340667	B73 RefGen_v4	An et al. 2020
PZE-103016459	3	8347795	B73 RefGen_v4	An et al. 2020
SYN19749	9	8497537	B73 RefGen_v4	An et al. 2020
PZE-110032522	10	11333936	B73 RefGen_v4	An et al. 2020
SYN38432	3	11564100	B73 RefGen_v4	An et al. 2020
PZE-104012925	4	11884573	B73 RefGen_v4	An et al. 2020
PZE-103021311	3	12463065	B73 RefGen_v4	An et al. 2020
SYN37730	3	12483101	B73 RefGen_v4	An et al. 2020
PZE-107015358	7	12754065	B73 RefGen_v4	An et al. 2020
PZE-107015480	7	12830550	B73 RefGen_v4	An et al. 2020
PZE-104013794	4	12948042	B73 RefGen_v4	An et al. 2020
PZE-107015643	7	13245920	B73 RefGen_v4	An et al. 2020
PZE-107017810	7	15699245	B73 RefGen_v4	An et al. 2020
PZE-107017996	7	15837373	B73 RefGen_v4	An et al. 2020
PZE-103025270	3	15972208	B73 RefGen_v4	An et al. 2020
PZE-105030100	5	16168847	B73 RefGen_v4	An et al. 2020
PZE-101026621	1	16226807	B73 RefGen_v4	An et al. 2020
PZE-104015863	4	16591744	B73 RefGen_v4	An et al. 2020
PZE-101027616	1	16843864	B73 RefGen_v4	An et al. 2020
PZE-104016126	4	16906636	B73 RefGen_v4	An et al. 2020
ZM013773-0223	3	17085886	B73 RefGen_v4	An et al. 2020
PZE-101028351	1	17190258	B73 RefGen_v4	An et al. 2020
PZE-104016299	4	17208904	B73 RefGen_v4	An et al. 2020
PZE-104016322	4	17243787	B73 RefGen_v4	An et al. 2020
PZE-104016440	4	17348982	B73 RefGen_v4	An et al. 2020
PZE-104016598	4	17493988	B73 RefGen_v4	An et al. 2020
PZE-104130985	4	18862064	B73 RefGen_v4	An et al. 2020
SYN26797	7	18964134	B73 RefGen_v4	An et al. 2020
SYN24977	7	19059456	B73 RefGen_v4	An et al. 2020
SYN20893	2	19259353	B73 RefGen_v4	An et al. 2020
PZA03442.1	2	19334301	B73 RefGen_v4	An et al. 2020
PZE-110017215	10	19625721	B73 RefGen_v4	An et al. 2020
SYN10617	9	22465703	B73 RefGen_v4	An et al. 2020
PZE-109022389	9	22595529	B73 RefGen_v4	An et al. 2020
PZE-109022419	9	22606885	B73 RefGen_v4	An et al. 2020
SYN6551	9	23037062	B73 RefGen_v4	An et al. 2020
PZE-105042248	5	23228634	B73 RefGen_v4	An et al. 2020
PZE-109023327	9	23284923	B73 RefGen_v4	An et al. 2020
PZE-101036862	1	24568501	B73 RefGen_v4	An et al. 2020
PZE-101036991	1	24660825	B73 RefGen_v4	An et al. 2020
PZE-103033517	3	25335705	B73 RefGen_v4	An et al. 2020
PZE-103033919	3	25585165	B73 RefGen_v4	An et al. 2020
PZE-110020178	10	26203506	B73 RefGen_v4	An et al. 2020
PUT-163a-16917550-985	9	26637276	B73 RefGen_v4	An et al. 2020
PUT-163a-16917550-981	9	26637299	B73 RefGen_v4	An et al. 2020
PUT-163a-18167798-1300	6	26710666	B73 RefGen_v4	An et al. 2020
SYN250	1	27115785	B73 RefGen_v4	An et al. 2020
PZE-101041070	1	27838687	B73 RefGen_v4	An et al. 2020
PZE-103035720	3	28264083	B73 RefGen_v4	An et al. 2020
PZE-103036000	3	28474786	B73 RefGen_v4	An et al. 2020
PZE-103036152	3	28866286	B73 RefGen_v4	An et al. 2020
PZE-101000111	1	29321097	B73 RefGen_v4	An et al. 2020
PZE-107024936	7	30390805	B73 RefGen_v4	An et al. 2020
PZE-107024977	7	30413870	B73 RefGen_v4	An et al. 2020
PZE-109065969	9	31881758	B73 RefGen_v4	An et al. 2020
PZE-110022926	10	34262581	B73 RefGen_v4	An et al. 2020
PUT-163a-60394982-2922	7	35724733	B73 RefGen_v4	An et al. 2020
PZE-105047074	5	36840398	B73 RefGen_v4	An et al. 2020
PZE-101053708	1	38233922	B73 RefGen_v4	An et al. 2020
PZE-101056000	1	40260932	B73 RefGen_v4	An et al. 2020
PZE-107030965	7	44103274	B73 RefGen_v4	An et al. 2020
PZE-107030971	7	44103728	B73 RefGen_v4	An et al. 2020
PUT-163a-76014682-3757	7	44103755	B73 RefGen_v4	An et al. 2020
SYN12586	1	44106382	B73 RefGen_v4	An et al. 2020
SYN12588	1	44109980	B73 RefGen_v4	An et al. 2020
PUT-163a-110942968-126	1	44543368	B73 RefGen_v4	An et al. 2020
SYN36078	1	45105111	B73 RefGen_v4	An et al. 2020
SYN36074	1	45105925	B73 RefGen_v4	An et al. 2020
PZE-102065949	2	45615529	B73 RefGen_v4	An et al. 2020
SYN37775	1	47542030	B73 RefGen_v4	An et al. 2020
PZE-101064619	1	47884166	B73 RefGen_v4	An et al. 2020
PZE-101064994	1	48718210	B73 RefGen_v4	An et al. 2020
PZE-101065132	1	48934907	B73 RefGen_v4	An et al. 2020
PZE-109036737	9	51383485	B73 RefGen_v4	An et al. 2020
PZE-101071373	1	54480066	B73 RefGen_v4	An et al. 2020
SYN24646	1	55086063	B73 RefGen_v4	An et al. 2020
SYN24640	1	55087238	B73 RefGen_v4	An et al. 2020
PZE-101073494	1	56920967	B73 RefGen_v4	An et al. 2020
PZE-101073495	1	56921303	B73 RefGen_v4	An et al. 2020
SYN11218	7	57181830	B73 RefGen_v4	An et al. 2020
PZE-101078631	1	63862139	B73 RefGen_v4	An et al. 2020
PZE-102081914	2	69167083	B73 RefGen_v4	An et al. 2020
PZE-110036859	10	69232347	B73 RefGen_v4	An et al. 2020
PZE-109039951	9	71662769	B73 RefGen_v4	An et al. 2020
SYN8764	8	71681216	B73 RefGen_v4	An et al. 2020
PZE-102085065	2	75841268	B73 RefGen_v4	An et al. 2020
PZE-108045967	8	75984739	B73 RefGen_v4	An et al. 2020
PZE-102085154	2	76079116	B73 RefGen_v4	An et al. 2020
PZE-109047930	9	83122743	B73 RefGen_v4	An et al. 2020
PZE-106037668	6	87708735	B73 RefGen_v4	An et al. 2020
PZE-110046880	10	88042500	B73 RefGen_v4	An et al. 2020
PZE-106040109	6	90449317	B73 RefGen_v4	An et al. 2020
PZE-106041442	6	92065706	B73 RefGen_v4	An et al. 2020
PZE-101098762	1	92229429	B73 RefGen_v4	An et al. 2020
PZE-109053325	9	92499759	B73 RefGen_v4	An et al. 2020
PZE-109053405	9	92757315	B73 RefGen_v4	An et al. 2020
PZE-104052299	4	93852845	B73 RefGen_v4	An et al. 2020
SYN37033	6	94601561	B73 RefGen_v4	An et al. 2020
PZE-106043261	6	94699700	B73 RefGen_v4	An et al. 2020
PZE-107049842	7	95403054	B73 RefGen_v4	An et al. 2020
PZE-107050243	7	96971230	B73 RefGen_v4	An et al. 2020
PZE-106047668	6	99943385	B73 RefGen_v4	An et al. 2020
PZE-106048055	6	100154810	B73 RefGen_v4	An et al. 2020
PZE-109058462	9	100215044	B73 RefGen_v4	An et al. 2020
PZE-109058896	9	100941658	B73 RefGen_v4	An et al. 2020
SYN30925	9	101069630	B73 RefGen_v4	An et al. 2020
PZE-109059124	9	101205185	B73 RefGen_v4	An et al. 2020
PZE-108057211	8	103161651	B73 RefGen_v4	An et al. 2020
PZE-101103446	1	104737744	B73 RefGen_v4	An et al. 2020
SYN21896	1	104737828	B73 RefGen_v4	An et al. 2020
PZE-107055306	7	105002151	B73 RefGen_v4	An et al. 2020
PZE-104084170	4	105766440	B73 RefGen_v4	An et al. 2020
PZE-110055114	10	106385425	B73 RefGen_v4	An et al. 2020
PZE-107057870	7	108972876	B73 RefGen_v4	An et al. 2020
PUT-163a-28873821-1636	7	114207246	B73 RefGen_v4	An et al. 2020
SYN18547	10	114438449	B73 RefGen_v4	An et al. 2020
PZE-108068597	8	122022770	B73 RefGen_v4	An et al. 2020
PZE-108068724	8	122398818	B73 RefGen_v4	An et al. 2020
SYN23732	10	122579360	B73 RefGen_v4	An et al. 2020
PZE-106070677	6	129154272	B73 RefGen_v4	An et al. 2020
PZE-108073230	8	130284833	B73 RefGen_v4	An et al. 2020
SYNGENTA3331	2	130853530	B73 RefGen_v4	An et al. 2020
PZE-105091239	5	131092601	B73 RefGen_v4	An et al. 2020
PZE-103081129	3	131603036	B73 RefGen_v4	An et al. 2020
PZE-103081408	3	131946413	B73 RefGen_v4	An et al. 2020
ZM013979-0369	10	133861483	B73 RefGen_v4	An et al. 2020
PZE-110078150	10	134119866	B73 RefGen_v4	An et al. 2020
PZE-110080302	10	135378218	B73 RefGen_v4	An et al. 2020
PZE-110080486	10	135457208	B73 RefGen_v4	An et al. 2020
PZE-108077447	8	135672262	B73 RefGen_v4	An et al. 2020
SYN12080	9	137905403	B73 RefGen_v4	An et al. 2020
PZE-109093737	9	138195562	B73 RefGen_v4	An et al. 2020
PZE-101115616	1	138266390	B73 RefGen_v4	An et al. 2020
PZE-110087648	10	138945553	B73 RefGen_v4	An et al. 2020
PZE-104068814	4	139245128	B73 RefGen_v4	An et al. 2020
SYN17906	10	140024577	B73 RefGen_v4	An et al. 2020
ZM010703-0403	6	140680543	B73 RefGen_v4	An et al. 2020
PZE-103087649	3	142540958	B73 RefGen_v4	An et al. 2020
SYN1014	10	143528281	B73 RefGen_v4	An et al. 2020
SYN22616	7	143782745	B73 RefGen_v4	An et al. 2020
SYN22615	7	143782774	B73 RefGen_v4	An et al. 2020
PZE-107089731	7	143821144	B73 RefGen_v4	An et al. 2020
PZE-103089180	3	144463527	B73 RefGen_v4	An et al. 2020
PZE-103089194	3	144477256	B73 RefGen_v4	An et al. 2020
SYN17955	7	145126114	B73 RefGen_v4	An et al. 2020
SYN13749	5	146270973	B73 RefGen_v4	An et al. 2020
PZE-110106563	10	147745205	B73 RefGen_v4	An et al. 2020
PZE-108088403	8	148639628	B73 RefGen_v4	An et al. 2020
PUT-163a-148967445-624	8	148681564	B73 RefGen_v4	An et al. 2020
PZE-108089628	8	149537659	B73 RefGen_v4	An et al. 2020
PZE-110110964	10	149555127	B73 RefGen_v4	An et al. 2020
PZE-110111039	10	149616489	B73 RefGen_v4	An et al. 2020
PZE-107095341	7	150236843	B73 RefGen_v4	An et al. 2020
PZE-107095342	7	150236975	B73 RefGen_v4	An et al. 2020
PZE-108090463	8	150525924	B73 RefGen_v4	An et al. 2020
PZE-108090567	8	150699370	B73 RefGen_v4	An et al. 2020
PZA03652.2	8	150719370	B73 RefGen_v4	An et al. 2020
SYN15956	9	152398052	B73 RefGen_v4	An et al. 2020
SYN15964	9	152415250	B73 RefGen_v4	An et al. 2020
PZE-109118418	9	152534366	B73 RefGen_v4	An et al. 2020
SYN13929	9	152661001	B73 RefGen_v4	An et al. 2020
SYN5238	6	154813042	B73 RefGen_v4	An et al. 2020
SYN4804	6	154945207	B73 RefGen_v4	An et al. 2020
SYN5822	3	157910833	B73 RefGen_v4	An et al. 2020
PZE-103097885	3	158093114	B73 RefGen_v4	An et al. 2020
PZE-101124504	1	158430623	B73 RefGen_v4	An et al. 2020
PZE-102117362	2	158740293	B73 RefGen_v4	An et al. 2020
PZE-108100441	8	159966801	B73 RefGen_v4	An et al. 2020
PZE-108100709	8	160156589	B73 RefGen_v4	An et al. 2020
PZE-106106459	6	160791655	B73 RefGen_v4	An et al. 2020
SYN14798	6	161834493	B73 RefGen_v4	An et al. 2020
PZE-101126807	1	162279221	B73 RefGen_v4	An et al. 2020
PZE-101126936	1	162357776	B73 RefGen_v4	An et al. 2020
PZE-101127872	1	163888944	B73 RefGen_v4	An et al. 2020
PZE-105106315	5	165036796	B73 RefGen_v4	An et al. 2020
PZE-105106278	5	165069772	B73 RefGen_v4	An et al. 2020
PZE-101129052	1	166045186	B73 RefGen_v4	An et al. 2020
ZM003119-1985	3	167110149	B73 RefGen_v4	An et al. 2020
PZE-103104752	3	167189023	B73 RefGen_v4	An et al. 2020
SYN31997	6	167814764	B73 RefGen_v4	An et al. 2020
PZE-104090244	4	168029082	B73 RefGen_v4	An et al. 2020
SYN13312	6	168214790	B73 RefGen_v4	An et al. 2020
PZE-105111962	5	172226543	B73 RefGen_v4	An et al. 2020
PZE-103110997	3	172322579	B73 RefGen_v4	An et al. 2020
SYN32932	3	172389278	B73 RefGen_v4	An et al. 2020
PZE-103111260	3	172660538	B73 RefGen_v4	An et al. 2020
PZE-103111262	3	172660810	B73 RefGen_v4	An et al. 2020
PZE-103111300	3	172668311	B73 RefGen_v4	An et al. 2020
PZE-107134294	7	173227744	B73 RefGen_v4	An et al. 2020
PZE-107135438	7	173695923	B73 RefGen_v4	An et al. 2020
SYN2154	4	173748059	B73 RefGen_v4	An et al. 2020
PZE-105114980	5	175237949	B73 RefGen_v4	An et al. 2020
SYN38847	5	175847414	B73 RefGen_v4	An et al. 2020
PZE-104084021	4	177258060	B73 RefGen_v4	An et al. 2020
SYN11017	5	177735745	B73 RefGen_v4	An et al. 2020
SYN11020	5	177741474	B73 RefGen_v4	An et al. 2020
ZM013637-0448	5	177964640	B73 RefGen_v4	An et al. 2020
PZE-103120924	3	180211153	B73 RefGen_v4	An et al. 2020
SYN31361	5	181507228	B73 RefGen_v4	An et al. 2020
SYN2308	4	183102830	B73 RefGen_v4	An et al. 2020
SYN2313	4	183103129	B73 RefGen_v4	An et al. 2020
PZE-102127973	2	183196481	B73 RefGen_v4	An et al. 2020
SYN8997	1	185318933	B73 RefGen_v4	An et al. 2020
PZE-102130234	2	185661093	B73 RefGen_v4	An et al. 2020
PZE-102130370	2	185948048	B73 RefGen_v4	An et al. 2020
SYN3148	4	188238267	B73 RefGen_v4	An et al. 2020
PZE-104109712	4	188381725	B73 RefGen_v4	An et al. 2020
SYN3156	4	188383074	B73 RefGen_v4	An et al. 2020
PZE-105128217	5	189367733	B73 RefGen_v4	An et al. 2020
PZE-101144585	1	189750712	B73 RefGen_v4	An et al. 2020
SYN38592	3	190124640	B73 RefGen_v4	An et al. 2020
PZE-105129197	5	190348366	B73 RefGen_v4	An et al. 2020
SYN30262	3	191926814	B73 RefGen_v4	An et al. 2020
PUT-163a-110967306-138	3	194954473	B73 RefGen_v4	An et al. 2020
PUT-163a-149109030-949	3	194954903	B73 RefGen_v4	An et al. 2020
PZE-105141682	5	195879428	B73 RefGen_v4	An et al. 2020
PZE-105137497	5	197016580	B73 RefGen_v4	An et al. 2020
SYN28488	5	201145207	B73 RefGen_v4	An et al. 2020
PZE-105146456	5	204098206	B73 RefGen_v4	An et al. 2020
PZE-101161325	1	206320759	B73 RefGen_v4	An et al. 2020
SYN30978	1	206533107	B73 RefGen_v4	An et al. 2020
PZE-101161688	1	206887515	B73 RefGen_v4	An et al. 2020
SYN20516	1	208510298	B73 RefGen_v4	An et al. 2020
PZE-102156525	2	210209998	B73 RefGen_v4	An et al. 2020
PZE-104126928	4	214406105	B73 RefGen_v4	An et al. 2020
PZE-105165903	5	214698801	B73 RefGen_v4	An et al. 2020
PZE-105165908	5	214700372	B73 RefGen_v4	An et al. 2020
PZE-104127244	4	215704031	B73 RefGen_v4	An et al. 2020
PZE-104127249	4	215704289	B73 RefGen_v4	An et al. 2020
SYN31932	2	216062967	B73 RefGen_v4	An et al. 2020
SYN10662	2	216353958	B73 RefGen_v4	An et al. 2020
ZM012880-0215	2	216592599	B73 RefGen_v4	An et al. 2020
PZE-103167510	3	218365172	B73 RefGen_v4	An et al. 2020
PZE-103167850	3	218524195	B73 RefGen_v4	An et al. 2020
PZE-101172448	1	218770018	B73 RefGen_v4	An et al. 2020
SYN28054	5	219816064	B73 RefGen_v4	An et al. 2020
PZE-103173892	3	222741660	B73 RefGen_v4	An et al. 2020
PZE-102176259	2	225776167	B73 RefGen_v4	An et al. 2020
SYN30485	3	227986813	B73 RefGen_v4	An et al. 2020
SYN28305	2	229504528	B73 RefGen_v4	An et al. 2020
SYN7390	2	230494388	B73 RefGen_v4	An et al. 2020
PZE-103186378	3	232899399	B73 RefGen_v4	An et al. 2020
PZE-101196460	1	233252432	B73 RefGen_v4	An et al. 2020
PZE-103187323	3	234329658	B73 RefGen_v4	An et al. 2020
SYN29804	4	241033471	B73 RefGen_v4	An et al. 2020
PZE-101196147	1	246909943	B73 RefGen_v4	An et al. 2020
PZE-101196289	1	247139822	B73 RefGen_v4	An et al. 2020
PZE-101196337	1	247271168	B73 RefGen_v4	An et al. 2020
PZE-101196421	1	247398736	B73 RefGen_v4	An et al. 2020
PZA03404.1	1	253110647	B73 RefGen_v4	An et al. 2020
SYN230	1	283493570	B73 RefGen_v4	An et al. 2020
