# Supplementary material for: Comparative transcriptome analysis identified candidate genes associated with kernel row number in maize
Source: PeerJ. 2025 Mar 31;13:e19143. doi: 10.7717/peerj.19143 (PMC11967441; doi:10.7717/peerj.19143)
Supplement: Supplemental Information 9 [file peerj-13-19143-s009.xlsx]

## Sheet: all_2132 DEGs
Supplemental Dataset 5 Candidate genes underlying QTLs and QTNs related to KRN
Chromosome	Start_Position	End_Position	Gene_ID	Gene name	description
1	16140364	16141359	Zm00001d027875		description=Mitochondrial substrate carrier family protein
1	16744340	16746866	Zm00001d027887		description=Catalytic/ hydrolase
1	16748760	16752406	Zm00001d027888		description=alpha/beta-Hydrolases superfamily protein
1	17163385	17164632	Zm00001d027903		description=Ubiquitin carboxyl-terminal hydrolase family protein
1	17186476	17190166	Zm00001d027904		description=3-ketoacyl-CoA synthase
1	24673011	24673466	Zm00001d028161
1	27085759	27086718	Zm00001d028222		description=Zinc finger protein 8
1	29513368	29517917	Zm00001d028297	Name=bHLH-transcription factor 3	description=Transcription factor bHLH62
1	40268286	40268585	Zm00001d028598		description=ROTUNDIFOLIA like 8
1	44554395	44560803	Zm00001d028733		description=SNF1-related protein kinase catalytic subunit alpha KIN10
1	45169934	45171167	Zm00001d028745		description=Rhodanese-like family protein
1	45171565	45179033	Zm00001d028746		description=Phosphoinositide phospholipase C 4
1	47880745	47883443	Zm00001d028829		description=Calmodulin-binding protein 60 G
1	48625761	48627434	Zm00001d028856		description=Retrovirus-related Pol polyprotein LINE-1
1	56919001	56921369	Zm00001d029065		description=Protein LRP16
1	63859845	63864152	Zm00001d029254		description=Solute carrier family 2%252C facilitated glucose transporter member 8
1	63916533	63917166	Zm00001d029257
1	92222078	92224093	Zm00001d029886
1	162231719	162233777	Zm00001d030832		description=Probable polyamine transporter
1	206917642	206923152	Zm00001d031923		description=Transcription factor GTE3 chloroplastic
1	208507191	208517368	Zm00001d031981		description=evolutionarily conserved C-terminal region 5
1	218790654	218795894	Zm00001d032249	Name=KANADI1	description=Kanadi1
1	233262795	233282063	Zm00001d032655		description= dicer-like 102
1	246870441	246874115	Zm00001d033011	Name=sucrose transporter3	description= sucrose transporter GRMZM2G083248
1	247311909	247314314	Zm00001d033020	Name=cytochrome P-450 8	description=Cytochrome P450 CYP78A1
1	247438333	247441383	Zm00001d033022		description=Retrovirus-related Pol polyprotein LINE-1
1	283054694	283059073	Zm00001d034066		description=UDP-glycosyltransferase 83A1
1	283080493	283082448	Zm00001d034069		description=UDP-glycosyltransferase 83A1
1	283193730	283197425	Zm00001d034073	Name=WRKY-transcription factor 30	description=Probable WRKY transcription factor 57
1	283401534	283408034	Zm00001d034076		description=Cyclic nucleotide-gated ion channel 2
1	283651338	283654633	Zm00001d034085		description=Expressed protein%3B protein
1	283957823	283959650	Zm00001d034096		description=cytochrome P450 family 81 subfamily D polypeptide 8
1	284233964	284235433	Zm00001d034111		description=Pentatricopeptide repeat protein
1	284242028	284244325	Zm00001d034112		description=Subtilisin-like protease
1	284441515	284445643	Zm00001d034118		description=Tryptophan N-monooxygenase 2
1	285008208	285010916	Zm00001d034143	Name=GNAT-transcription factor 6	description=Probable N-acetyltransferase HLS1
1	285024081	285024917	Zm00001d034145		description=Zinc finger protein AZF2
1	285033162	285036599	Zm00001d034148		description=Glutathione S-transferase T1
1	285707107	285709046	Zm00001d034175		description=CCG-binding protein 1
1	285811145	285811498	Zm00001d034179		description=Plastoquinol-plastocyanin reductase
1	285863974	285871788	Zm00001d034181		description=Probable transcription factor KAN4
1	285946538	285948088	Zm00001d034184	Name=allene oxide synthesis4	description= allene oxide synthesis4
1	286080950	286082217	Zm00001d034189		description=CASP-like protein 12
1	286166897	286167445	Zm00001d034190
1	286269420	286269977	Zm00001d034195		description=Calmodulin-like protein 41
1	286353333	286353964	Zm00001d034197
1	286978889	286980925	Zm00001d034217		description=Lectin-like receptor kinase 7
1	286998066	287000890	Zm00001d034218		description=Cytochrome c oxidase subunit 6a mitochondrial
1	287064657	287066369	Zm00001d034223		description=40S ribosomal protein S29
1	288239032	288239958	Zm00001d034259		description=Probable nucleolar protein 5-1
1	288271685	288274735	Zm00001d034262		description=Retrovirus-related Pol polyprotein LINE-1
1	288275261	288289725	Zm00001d034263	Name=umc161a	description=GYF domain-containing protein
1	288277584	288280598	Zm00001d034264		description=Retrovirus-related Pol polyprotein LINE-1
1	288457795	288458472	Zm00001d034283		description=Photosystem I reaction center subunit III
1	288700634	288700775	zma-MIR160d
1	289178554	289182576	Zm00001d034320		description=Inosine-5'-monophosphate dehydrogenase
1	289588568	289589048	Zm00001d034330
1	290204343	290207367	Zm00001d034338		description=Deoxyribodipyrimidine photolyase
1	290229241	290231041	Zm00001d034340		description=Patatin-like protein 6
1	290340954	290343574	Zm00001d023007
1	290438168	290439328	Zm00001d034353	Name=TCP-transcription factor 5	description=Transcription factor TCP2
1	290470998	290471672	Zm00001d034356	Name=glutathione transferase5	description=glutathione transferase5
1	290668538	290669359	Zm00001d034359		description=Drought and salt tolerance protein%3B Expressed protein
1	291055449	291058538	Zm00001d034368	Name=chaperone DNA J homolog1	description= chaperone DNA J homolog1
1	291065525	291075328	Zm00001d034370
1	291107391	291111360	Zm00001d034372		description=Calcium-dependent protein kinase 1
1	291510737	291518900	Zm00001d034385	Name=aldehyde oxidase3	description= aldehyde oxidase3
1	291605273	291613251	Zm00001d034387	Name=aldehyde oxidase1	description= aldehyde oxidase1
1	291662839	291670088	Zm00001d034388	Name=aldehyde oxidase4	description= aldehyde oxidase4
1	292054220	292055148	Zm00001d034407
1	292185580	292187887	Zm00001d034412		description=Imidazole glycerol phosphate synthase hisHF chloroplastic
1	292486760	292492680	Zm00001d034421		description=Actin-7
1	292612409	292617099	Zm00001d034423		description=Tetratricopeptide repeat (TPR)-like superfamily protein
1	292938720	292946329	Zm00001d034434		description=Histone acetyltransferase type B catalytic subunit
1	293311185	293313786	Zm00001d034448
1	293402750	293408353	Zm00001d034452		description=Tryptophan synthase alpha chain chloroplastic
1	293445011	293448326	Zm00001d034455		description=Basic leucine zipper 25
1	293562779	293567510	Zm00001d034457	Name=opaque2 heterodimerizing protein1	description=Opaque2 heterodimerizing protein 1
1	293615920	293621281	Zm00001d034460	Name=tryptophan synthase A homolog1	description= tryptophan synthase A homolog1
1	293622653	293624784	Zm00001d034461		description=Tryptophan synthase alpha chain chloroplastic
1	293749001	293752408	Zm00001d034463	Name=Aux/IAA-transcription factor5	description= Aux/IAA-transcription factor5
1	293832927	293851213	Zm00001d034468		description=Protein binding protein
1	293920218	293920901	Zm00001d034469		description=PRA1 family protein E
1	294256802	294261060	Zm00001d034487		description=Sec12-like protein 1
1	294664207	294665514	Zm00001d034495		description=LEAF RUST 10 DISEASE-RESISTANCE LOCUS RECEPTOR-LIKE PROTEIN KINASE-like 1.5
1	294670633	294671503	Zm00001d034497		description=cysteine-rich TM module stress tolerance protein
1	294925237	294925734	Zm00001d034506
1	295267851	295269758	Zm00001d034512
1	295472178	295480964	Zm00001d034516		description=Squalene synthase 1
1	295595608	295603239	Zm00001d034519		description=Probable acyl-activating enzyme 18 peroxisomal
1	295713001	295716380	Zm00001d034529
1	295784694	295789755	Zm00001d023022
1	296099081	296100503	Zm00001d034554		description=AT5G44030 (E%3D6e-024) CESA4 IRX5 NWS2 | CESA4 (CELLULOSE SYNTHASE A4)%3B cellulose synthase/ transferase transferring glycosyl groups
1	296175631	296185070	Zm00001d034555		description=Disease resistance protein RPM1
1	296458782	296462896	Zm00001d034564		description=Probable galactinol--sucrose galactosyltransferase 2
1	296489820	296491595	Zm00001d034569		description=Cytokinin-O-glucosyltransferase 2
1	296596877	296600683	Zm00001d034571	Name=bZIP-transcription factor 29	description=G-box-binding factor 1
1	296914952	296930870	Zm00001d034578		description=RNA-binding protein 8A
1	297851788	297852537	Zm00001d034613
1	297858445	297859673	Zm00001d034615		description=Protein LURP-one-related 14
1	297863276	297876107	Zm00001d034616		description=Protein SCAR2
1	298412338	298414927	Zm00001d034628		description=40S ribosomal protein S23-2
1	298548893	298572907	Zm00001d034633		description=Transducin/WD40 repeat-like superfamily protein
1	298573878	298575017	Zm00001d034634		description=Heavy metal transport/detoxification superfamily protein
1	298580972	298582430	Zm00001d034635	Name=chalcone flavanone isomerase1	description= chalcone flavanone isomerase1
1	298855809	298858616	Zm00001d034651	Name=C2C2-Dof-transcription factor 27	description=Dof zinc finger protein DOF3.6
1	298994999	298998450	Zm00001d034655	Name=umc86a	description=Probable protein phosphatase 2C 4
1	299194181	299196764	Zm00001d034663	Name=alpha-expansin4	description= alpha-expansin4
1	299311424	299313518	Zm00001d034668		description=Chaperone DnaJ-domain superfamily protein
1	299619441	299623771	Zm00001d034678		description=Permease I
1	300052846	300055171	Zm00001d034688		description=uncharacterized protein [Source:UniProtKB/TrEMBL%3BAcc:B6T132]
1	300345623	300345976	Zm00001d034705		description=uncharacterized protein [Source:UniProtKB/TrEMBL%3BAcc:B4FS10]
1	300346551	300349807	Zm00001d034706		description=GDP-mannose transporter GONST2
1	300433186	300446993	Zm00001d034711
1	300526733	300527389	Zm00001d034715	Name=rubisco accumulation factor2	description= rubisco accumulation factor2
1	300741005	300741352	Zm00001d034722
1	300852251	300854480	Zm00001d034729		description=Carbohydrate-binding X8 domain superfamily protein
1	301479326	301479550	Zm00001d034756
1	301648441	301649091	Zm00001d034763		description=Harpin-induced protein
1	301668048	301674553	Zm00001d034766		description=Lysine--tRNA ligase chloroplastic/mitochondrial
1	301678066	301679914	Zm00001d034769		description=cytochrome P450 family 722 subfamily A polypeptide 1
1	301737379	301745945	Zm00001d034772		description=Encodes a close homolog of the Cauliflower OR (Orange) protein. The function of OR is to induce the differentiation of proplastids or other noncolored plastids into chromoplasts for carotenoid accumulation. Both proteins contain a Cysteine-rich zi /.../ger domain that is highly specific to DnaJ-like molecular chaperons.
1	302038413	302052740	Zm00001d034777		description=Nicotinate phosphoribosyltransferase 2
1	302328675	302332694	Zm00001d034788		description=Protein kinase protein with adenine nucleotide alpha hydrolases-like domain
1	302378485	302387299	Zm00001d034796		description=Vacuolar protein sorting-associated protein 9A
1	302468902	302475499	Zm00001d034804
1	303240120	303243318	Zm00001d034828		description=Nucleic acid-binding proteins superfamily
1	303243570	303245421	Zm00001d034829		description=Pirin-like protein 2
1	303454791	303456205	Zm00001d034836		description=Wiscott-Aldrich syndrome%252C C-terminal
1	303573712	303576362	Zm00001d034839		description=Purple acid phosphatase 15
1	303812821	303814256	Zm00001d034852		description=F3H9.20 protein
2	2812723	2813940	Zm00001d001915
2	2987346	3010796	Zm00001d001923		description=SKP1-like protein 4
2	3022804	3026409	Zm00001d001924		description=KAR-UP oxidoreductase 1
2	3201231	3204850	Zm00001d001941	Name=invertase cell wall4	description= invertase cell wall4
2	3244741	3247431	Zm00001d001944		description=Beta-fructofuranosidase insoluble isoenzyme CWINV3
2	3404971	3408793	Zm00001d001947		description=TLD-domain containing nucleolar protein
2	3543770	3549932	Zm00001d001959		description=GTP cyclohydrolase I 1
2	3717523	3719516	Zm00001d001972
2	3952212	3954752	Zm00001d001984		description=Probable amino acid permease 7
2	4060451	4060702	Zm00001d001990	Name=GRMZM2G391746
2	4069761	4072922	Zm00001d001993		description=Probable leucine-rich repeat receptor-like serine/threonine-protein kinase
2	4127517	4130914	Zm00001d001996
2	4150293	4154404	Zm00001d002000	Name=lipoxygenase6	description= lipoxygenase6
2	4156560	4157278	Zm00001d002001
2	4230854	4234535	Zm00001d002005	Name=liguleless1	description=Protein LIGULELESS 1
2	4628845	4634985	Zm00001d002025	Name=AP2-EREBP-transcription factor 24	description=AP2-like ethylene-responsive transcription factor AIL5
2	5018197	5021343	Zm00001d002052		description=Probable isoaspartyl peptidase/L-asparaginase 2
2	5036500	5039237	Zm00001d002054	Name=photosynthetic electron transport3	description= photosynthetic electron transport3
2	5176357	5177787	Zm00001d002063		description=UDP-glycosyltransferase 89B1
2	5191813	5195757	Zm00001d002064		description=Glycosyltransferase
2	5267442	5268449	Zm00001d002066		description=Protein IRX15-LIKE
2	5288503	5289625	Zm00001d002067		description=Protein IRX15-LIKE
2	5364541	5364798	Zm00001d002069		description=DNA topoisomerase 2
2	5870323	5870748	Zm00001d002093		description=36.4 kDa proline-rich protein
2	5872428	5873039	Zm00001d002094		description=Bifunctional inhibitor/lipid-transfer protein/seed storage 2S albumin superfamily protein
2	5947564	5948181	Zm00001d002096		description=Sterile alpha motif (SAM) domain-containing protein
2	5979615	5981068	Zm00001d002100		description=OSJNBa0033G05.6 protein%3B OSJNBa0063C18.20 protein%3B protein
2	5980086	5981005	Zm00001d002101
2	6080286	6092137	Zm00001d002113
2	6125333	6132308	Zm00001d002119		description=ABC transporter B family member 19
2	6409519	6412809	Zm00001d002128		description=Shikimate kinase 1 chloroplastic
2	6422180	6424987	Zm00001d002130
2	6436643	6437312	Zm00001d002132
2	6508338	6509353	Zm00001d002137	Name=precursor elicitor peptide1	description= precursor elicitor peptide1
2	6550006	6551872	Zm00001d002139		description=Transferase
2	6636877	6642835	Zm00001d002143	Name=bZIP-transcription factor 27	description=Transcription factor TGA4
2	6773725	6776694	Zm00001d002146		description=BTB/POZ domain-containing protein
2	6864643	6869033	Zm00001d002153		description=Heterogeneous nuclear ribonucleoprotein U-like protein 1
2	6886753	6887019	Zm00001d002158		description=Wound-responsive family protein
2	6889076	6889357	Zm00001d002159		description=Wound induced protein
2	6893694	6893936	Zm00001d002160		description=Wound-responsive family protein
2	7002198	7013173	Zm00001d002164
2	7239862	7249041	Zm00001d002174		description=Cysteine-rich receptor-like protein kinase 6
2	7656052	7658947	Zm00001d002191		description=Organic cation/carnitine transporter 4
2	7754336	7754833	Zm00001d002194		description=receptor like protein 29
2	7754851	7760229	Zm00001d002195		description=Testis intracellular mediator protein
2	7833348	7838132	Zm00001d002198		description=Receptor-like serine/threonine-protein kinase SD1-8
2	8463903	8470216	Zm00001d002234	Name=Homeobox-transcription factor 75	description=Homeodomain leucine zipper family IV protein
2	8607518	8615365	Zm00001d002239
2	9046823	9047224	Zm00001d002254
2	9055230	9066450	Zm00001d002256		description=Starch synthase 3 chloroplastic/amyloplastic
2	9089887	9093334	Zm00001d002260		description=Peroxisomal (S)-2-hydroxy-acid oxidase GLO1
2	9128245	9128913	Zm00001d002262
2	9129688	9132600	Zm00001d002263		description=Peptidase M1 family protein
2	9167395	9172599	Zm00001d002266		description=Lysine-specific histone demethylase 1
2	9318025	9322925	Zm00001d002277		description=BAG family molecular chaperone regulator 1
2	9427786	9430561	Zm00001d002278		description=OSJNBa0058K23.15 protein%3B protein
2	9741120	9769903	Zm00001d002299		description=ATP-dependent DNA helicase [Source:UniProtKB/TrEMBL%3BAcc:A0A1D6DZA9]
2	9772239	9773464	Zm00001d002301		description=uncharacterized protein [Source:UniProtKB/TrEMBL%3BAcc:B6U3S9]
2	9804029	9808439	Zm00001d002305		description=AP-3 complex subunit mu
2	10000201	10001504	Zm00001d002307
2	10157520	10164911	Zm00001d002316	Name=argonaute2a	description= argonaute2a
2	10631062	10633353	Zm00001d002343		description=Zinc transporter 1
2	11368790	11369293	Zm00001d002374		description=SAUR-like auxin-responsive protein family
2	11470204	11474115	Zm00001d002378		description=Sodium transporter HKT1
2	11634309	11636302	Zm00001d002384		description=PAP fibrillin family protein
2	12108932	12111101	Zm00001d002407		description=Probable metal-nicotianamine transporter YSL7
2	12112262	12114644	Zm00001d002408		description=CHL-CPN10
2	12406436	12411685	Zm00001d002426		description=Thylakoid lumenal 29 kDa protein chloroplastic
2	12914091	12917068	Zm00001d002449	Name=Zea floricaula leafy2	description=Floricaula/leafy-like 2
2	13527258	13529081	Zm00001d002473		description=DUF674 family protein
2	14195924	14196777	Zm00001d002506
2	15128166	15131434	Zm00001d002545	Name=MYB-related-transcription factor 20	description=Protein REVEILLE 1
2	15136122	15136535	Zm00001d002547		description=Transferasesfolic acid binding
2	15260622	15264237	Zm00001d002551
2	15366760	15371345	Zm00001d002560		description=Enhancer of mRNA-decapping protein 4
2	15538202	15540469	Zm00001d002564		description=Protein DMR6-LIKE OXYGENASE 2
2	16080982	16082543	Zm00001d002584
2	16287469	16289962	Zm00001d002589	Name=hydroxylase4	description= hydroxylase4
2	16398418	16401870	Zm00001d002597		description=Rho GTPase-activating protein 3
2	16448127	16456419	Zm00001d002600		description=Polyprenol reductase 2
2	16960148	16960816	Zm00001d002618	Name=AP2-EREBP-transcription factor 105	description=Dehydration-responsive element-binding protein 1D
2	17149611	17153983	Zm00001d002625		description=Probable methyltransferase PMT15
2	17190893	17193599	Zm00001d002626		description=Cytochrome P450 CYP87A15
2	17558498	17560398	Zm00001d002632		description=RHOMBOID-like protein 3
2	17897820	17900567	Zm00001d002642		description=Dof zinc finger protein DOF2.5
2	18092188	18095739	Zm00001d002649	Name=G2-like-transcription factor 37	description=Putative Myb family transcription factor
2	18176301	18185185	Zm00001d002650	Name=argonaute1c	description= argonaute1c
2	18907323	18909618	Zm00001d002673		description=Lysine histidine transporter-like 7
2	19071690	19082040	Zm00001d002678		description=Prolyl oligopeptidase family protein
2	19117544	19121103	Zm00001d002680		description=OSJNBa0084K11.8 protein
2	19196343	19207627	Zm00001d002682		description=Alpha-L-fucosidase 1
2	19320228	19329846	Zm00001d002688		description=Mitogen-activated protein kinase kinase kinase YODA
2	19414196	19420375	Zm00001d002693		description=U-box domain-containing protein 33
2	19448223	19453968	Zm00001d002695		description=Phosphatidylinositol N-acetyglucosaminlytransferase subunit P-related
2	19454076	19456451	Zm00001d002696		description=Rop guanine nucleotide exchange factor 2
2	19546182	19546508	Zm00001d002700
2	19814237	19820680	Zm00001d002705		description=Putative ATP dependent copper transporter
2	19911563	19919891	Zm00001d002708		description=Probable copper-transporting ATPase HMA5
2	20455119	20455520	Zm00001d002721		description=extensin-like protein
2	20534714	20537080	Zm00001d002727		description=Acyl-acyl carrier protein thioesterase ATL3 chloroplastic
2	20711228	20711941	Zm00001d002733		description=Cyclin-U2-1
2	21104664	21105814	Zm00001d002738		description=Probable aquaporin TIP2-2
2	21269944	21270749	Zm00001d002743		description=Zinc ion binding protein
2	21386536	21386988	Zm00001d002748		description=Dehydration-responsive element-binding protein 1B
2	21813079	21818936	Zm00001d002758		description=DeSI-like protein
2	22115028	22130846	Zm00001d002770		description=ARM repeat superfamily protein
2	22167851	22169500	Zm00001d002771
2	22245609	22246070	Zm00001d002774
2	22828445	22832747	Zm00001d002796		description=ELMO/CED-12 family protein
2	23082802	23086615	Zm00001d002801	Name=Trihelix-transcription factor 12	description=GT-2-like 1
2	23113153	23114211	Zm00001d002802		description=Leucine-rich repeat receptor protein kinase EXS
2	23520867	23532848	Zm00001d002817		description=Kinesin-like protein KIN-7G
2	23768922	23777897	Zm00001d002823		description=Hsp70-Hsp90 organizing protein 3
2	24002536	24006073	Zm00001d002828	Name=NAC-transcription factor 131	description=NAC domain-containing protein 26
2	24243407	24244918	Zm00001d002833		description=Pepsin A
2	24772447	24776140	Zm00001d002854		description=Thioredoxin M1 chloroplastic
2	25060415	25060900	Zm00001d002868		description=ferredoxin/thioredoxin reductase subunit A (variable subunit) 2
2	25544333	25546588	Zm00001d002879
2	25550488	25552575	Zm00001d002881		description=Putative pentatricopeptide repeat-containing protein
2	26144895	26145908	Zm00001d002899		description=Peroxidase 12
2	27420578	27426388	Zm00001d002937		description=cytochrome P450 family 72 subfamily A polypeptide 8
2	27986031	27988042	Zm00001d002952		description=Probable aquaporin TIP3-2
2	28067652	28084390	Zm00001d002954		description=Cox19-like CHCH family protein
2	28255272	28260128	Zm00001d002966		description=Serine carboxypeptidase-like 35
2	28307399	28309598	Zm00001d002968		description=Pentatricopeptide repeat-containing protein
2	28312353	28313132	Zm00001d002969		description=ATP-dependent Clp protease proteolytic subunit 2 mitochondrial
2	28350907	28355040	Zm00001d002970	Name=silkless ears1	description= silkless ears1
2	28866474	28867724	Zm00001d002982	Name=aberrant phyllotaxy1	description=Response regulator
2	28976470	28977417	Zm00001d002993		description=Oxygen-evolving enhancer protein 3
2	29237928	29238593	Zm00001d003003		description=OSJNBa0019D11.18 protein%3B protein
2	29552168	29562830	Zm00001d003017		description=Adenosine kinase 2
2	29734149	29735130	Zm00001d003024		description=Enzyme of the cupin superfamily
2	30053282	30054643	Zm00001d003035		description=Tetratricopeptide repeat (TPR)-like superfamily protein
2	30079480	30081862	Zm00001d003039		description=Actin-related protein 2/3 complex subunit 2B
2	30712433	30716196	Zm00001d003059		description=Probable low-specificity L-threonine aldolase 1
2	31067940	31072441	Zm00001d003067		description=Protein root UVB sensitive 2 chloroplastic
2	31084436	31085836	Zm00001d003068	Name=phosphoenolpyruvate carboxylase kinase4	description=Phosphoenolpyruvate carboxylase kinase 2
2	31707031	31709757	Zm00001d003085		description=GDSL esterase/lipase LTL1
2	32088958	32090373	Zm00001d003102		description=UDP-glycosyltransferase 92A1
2	32464010	32470101	Zm00001d003108	Name=adenine phosphoribosyltransferase1	description= adenine phosphoribosyltransferase1
2	32540978	32544536	Zm00001d003110		description=Calmodulin-binding receptor-like cytoplasmic kinase 3
2	32677543	32684692	Zm00001d003114		description=calcium-binding EF hand family protein
2	32825867	32827637	Zm00001d003120		description=T-complex protein 11
2	33305015	33307758	Zm00001d003128		description=Zinc finger BED domain-containing protein DAYSLEEPER
2	33778157	33782681	Zm00001d003149		description=Probable folate-biopterin transporter 2
2	33845079	33848826	Zm00001d003151		description=N-acetyltransferase ESCO1
2	33981493	33984783	Zm00001d003157	Name=S-adenosyl methionine decarboxylase2	description=S-adenosylmethionine decarboxylase proenzyme S-adenosylmethionine decarboxylase alpha chain S-adenosylmethionine decarboxylase beta chain
2	34011466	34013265	Zm00001d003161		description=OSJNBa0067K08.20 protein%3B protein
2	34080161	34081769	Zm00001d003162	Name=C2C2-CO-like-transcription factor 11	description=Zinc finger protein CONSTANS-LIKE 5
2	34889630	34892415	Zm00001d003181		description=Cytochrome b561 and DOMON domain-containing protein
2	35243617	35247317	Zm00001d003193		description=basic helix-loop-helix (bHLH) DNA-binding superfamily protein
2	35276371	35286449	Zm00001d003194		description=Zinc finger BED domain-containing protein DAYSLEEPER
2	37815902	37818424	Zm00001d003247	Name=malate synthase1	description= malate synthase1
2	38333787	38335419	Zm00001d003264		description=BCL-2 binding anthanogene-1
2	38342885	38347402	Zm00001d003265		description=Topoisomerase-like protein
2	38437219	38439671	Zm00001d003271		description=Peptide methionine sulfoxide reductase
2	38563122	38565277	Zm00001d003276		description=S-adenosyl-L-methionine-dependent methyltransferases superfamily protein
2	38572522	38576707	Zm00001d003277		description=Stachyose synthase
2	38586400	38587859	Zm00001d003279		description=Probable galactinol--sucrose galactosyltransferase 2
2	38636040	38640054	Zm00001d003280		description=Probable galactinol--sucrose galactosyltransferase 2
2	38818381	38832276	Zm00001d003289
2	39107875	39110040	Zm00001d003294		description=Pentatricopeptide repeat-containing protein mitochondrial
2	39700454	39702802	Zm00001d003310
2	39759791	39762588	Zm00001d003312		description=3-ketoacyl-CoA thiolase 2 peroxisomal
2	39889306	39890655	Zm00001d003315		description=Protein Brevis radix-like 4
2	40129192	40131783	Zm00001d003321		description=FT-interacting protein 1
2	40134430	40141796	Zm00001d003322		description=OSJNBb0022F23.8 protein
2	40564802	40567943	Zm00001d003334		description=WPP domain-interacting protein 2
2	41017793	41019879	Zm00001d003345		description=Small nuclear ribonucleoprotein Sm D1
2	41020781	41020960	Zm00001d003346
2	42234465	42235544	Zm00001d003379	Name=pathogenesis-related protein2	description=Major latex protein 22%253B Pathogenesis-related protein 2
2	42239268	42240320	Zm00001d003380	Name=cl22897_1a	description=Gibberellin-regulated protein 14
2	42343911	42345140	Zm00001d003381		description=Peroxidase 65
2	42496182	42497972	Zm00001d003386
2	42586358	42587392	Zm00001d003390		description=Acyl-CoA--sterol O-acyltransferase 1
2	42617018	42618010	Zm00001d003392		description=zinc finger (C2H2 type) family protein
2	43285525	43287246	Zm00001d003404		description=OSJNBa0072F16.18 protein%3B protein
2	43580336	43582878	Zm00001d003412	Name=MYB-transcription factor 49	description=P-type R2R3 Myb protein
2	43705185	43706945	Zm00001d003414	Name=NAC-transcription factor 32	description=NAC domain-containing protein 79
2	43834579	43837696	Zm00001d003422		description=Amino acid/polyamine transporter II
2	44100341	44102181	Zm00001d003429	Name=glyceraldehyde-3-phosphate dehydrogenase1	description=Glyceraldehyde-3-phosphate dehydrogenase A%252C chloroplastic
2	44260748	44263686	Zm00001d003434		description=Galactose mutarotase-like superfamily protein
2	44315725	44316616	Zm00001d003435
2	44471631	44475463	Zm00001d003439
2	45018395	45021399	Zm00001d003459		description=Protein disulfide-isomerase LQY1 chloroplastic
2	45238738	45242608	Zm00001d003469		description=Sugar transport protein 5
2	45281416	45286675	Zm00001d003470		description=Probable plastid-lipid-associated protein 2 chloroplastic
2	45287341	45292164	Zm00001d003471		description=Sugar transport protein 5
2	45393054	45400996	Zm00001d003474		description=Heterogeneous nuclear ribonucleoprotein U-like protein 1
2	45893363	45895300	Zm00001d003492		description=Myosin heavy chain-related protein
2	46024387	46026629	Zm00001d003493		description= ribosomal protein L32 homolog32
2	46658256	46660165	Zm00001d003524		description=NAD(P)-linked oxidoreductase superfamily protein
2	47414810	47417311	Zm00001d003540		description=OBP3-responsive gene 4
2	47671245	47671586	Zm00001d003545
2	48536798	48537322	Zm00001d003573		description=C2H2 zinc finger malformed spikelet%3B OSJNBa0058G03.3 protein%3B protein
2	48710469	48711552	Zm00001d003575		description=RING-H2 finger protein ATL3
2	49052848	49056045	Zm00001d003584	Name=12-oxo-phytodienoic acid reductase5	description= 12-oxo-phytodienoic acid reductase5
2	49078847	49082055	Zm00001d003589	Name=ypt homolog1	description= ypt homolog1
2	49227070	49227546	Zm00001d003593		description=Expressed protein%3B protein
2	49591583	49595579	Zm00001d003603		description=Protein NRT1/ PTR FAMILY 4.4
2	49809214	49811410	Zm00001d003606
2	49876647	49878832	Zm00001d003607
2	50414664	50419883	Zm00001d003615		description=T-complex protein 11
2	183194823	183197373	Zm00001d005682		description=Protein kinase superfamily protein
2	185588363	185590379	Zm00001d005742
2	185946481	185947866	Zm00001d005748		description=CIPK-like protein 1
2	191436169	191438639	Zm00001d005874
2	191770814	191772016	Zm00001d005885
2	191792061	191795245	Zm00001d005889	Name=abscisic acid 8'-hydroxylase5	description= abscisic acid 8'-hydroxylase5
2	192024817	192028922	Zm00001d005894		description=Leucine-rich repeat (LRR) family protein
2	192223719	192225106	Zm00001d005901
2	192376325	192377383	Zm00001d005905		description=Probable carboxylesterase 2
2	192531480	192536267	Zm00001d005912		description=Polyadenylate-binding protein RBP47B
2	192687906	192692019	Zm00001d005917		description= protein%3B Ternary complex factor MIP1-like protein
2	193307734	193311021	Zm00001d005934		description=Purine permease 3
2	193447338	193448411	Zm00001d005940		description=RING-H2 finger protein ATL54
2	193506565	193507005	Zm00001d005945
2	193530287	193553106	Zm00001d005948		description=Isoamylase 3 chloroplastic
2	193582548	193587675	Zm00001d005949		description=Isoamylase 3 chloroplastic
2	193728105	193730506	Zm00001d005951	Name=Homeobox-transcription factor 54	description=Homeobox-leucine zipper protein ATHB-6
2	194057868	194060798	Zm00001d005964	Name=bHLH-transcription factor 151	description=Transcription factor bHLH76
2	194309786	194310601	Zm00001d005971		description=Fasciclin-like arabinogalactan protein 2
2	194858082	194858342	Zm00001d005989
2	194954684	194956316	Zm00001d005998		description=Caffeoyl-CoA O-methyltransferase 1
2	195072053	195073262	Zm00001d006002
2	195228750	195230170	Zm00001d006010
2	195298613	195299098	Zm00001d006016		description=Multiple stress-responsive zinc-finger protein ISAP1
2	195358970	195361575	Zm00001d006019		description=OTU domain-containing protein
2	195425336	195428897	Zm00001d006022	Name=bHLH-transcription factor 6	description=Transcription factor bHLH130
2	195514497	195514982	Zm00001d006026		description=Lysine-specific demethylase JMJ30
2	195820134	195824384	Zm00001d006034		description=DNA binding protein
2	196594833	196601227	Zm00001d000998
2	196609825	196611039	Zm00001d006054		description=Pathogenesis-related thaumatin superfamily protein
2	196690494	196696633	Zm00001d006056		description=L-ascorbate peroxidase 2 cytosolic
2	196878663	196879046	Zm00001d006060
2	197252964	197253703	Zm00001d006067		description=FK506-binding protein 2-1
2	197575106	197579019	Zm00001d006080		description=Oleoyl-acyl carrier protein thioesterase
2	197838173	197852949	Zm00001d006089		description=Shaggy kinase homolog
2	198119518	198121782	Zm00001d006097		description=Peroxidase 55
2	198198555	198200085	Zm00001d006106	Name=NAC-transcription factor 35	description=NAC domain-containing protein 18
2	198518592	198520833	Zm00001d006110	Name=bHLH-transcription factor 23	description=Transcription factor bHLH137
2	199001851	199007982	Zm00001d006116	Name=phosphatidylethanolamine-binding protein18	description=ZCN18
2	199004602	199007190	Zm00001d001004
2	199262613	199265379	Zm00001d006126		description=Trigger factor
2	199265525	199270738	Zm00001d006127	Name=bZIP-transcription factor 65	description=Probable transcription factor PosF21
2	199509522	199514949	Zm00001d006133		description=Thioesterase/thiol ester dehydrase-isomerase superfamily protein
2	199680579	199682648	Zm00001d006140		description=UDP-glycosyltransferase 74B1
2	199712742	199713458	Zm00001d006145		description=UDP-glycosyltransferase 74B1
2	199865890	199868263	Zm00001d006152		description=SH3 domain-containing protein 3
2	200053666	200054876	Zm00001d006158
2	200079624	200081355	Zm00001d006159		description=Ycf49-like protein
2	200397718	200398512	Zm00001d006169	Name=DRE-binding protein3	description=CBF3-like protein%253B CRT/DRE binding factor%253B DREB-like protein
2	200830545	200833132	Zm00001d006180		description=NC domain-containing protein-related
2	200996430	200999253	Zm00001d006185		description=6-phosphogluconolactonase
2	201255021	201257277	Zm00001d006193		description=cytochrome P450 family 78 subfamily A polypeptide 8
2	201266019	201271833	Zm00001d006194		description=Mediator complex subunit 10 CG5057-PA
2	201274832	201276496	Zm00001d006195	Name=Homeobox-transcription factor 126	description=Homeobox-leucine zipper protein ATHB-12
2	201786822	201788703	Zm00001d006207		description=RNA recognition motif 2 family protein
2	201896427	201897959	Zm00001d006209	Name=SHI/STY (SRS)-transcription factor 2	description=Protein SHI RELATED SEQUENCE 1
2	201912795	201914678	Zm00001d006211		description=Protein STAY-GREEN 1 chloroplastic
2	202081239	202085911	Zm00001d006217		description=Serine/threonine-protein kinase NAK
2	202392518	202411974	Zm00001d006230		description=Chaperone protein dnaJ 3
2	202910034	202917109	Zm00001d006257	Name=phospholipase D10	description= phospholipase D10
2	203134987	203135343	Zm00001d006261
2	203183372	203184196	Zm00001d006262		description=Phospholipase D delta
2	203933323	203937922	Zm00001d006295		description=DNA-binding bromodomain-containing protein
2	204009613	204013076	Zm00001d006297		description=G-type lectin S-receptor-like serine/threonine-protein kinase B120
2	204058630	204070381	Zm00001d006300		description=MUTL protein homolog 3
2	204070449	204073025	Zm00001d006301		description=MUTL protein homolog 3
2	204151697	204175780	Zm00001d006307		description=MUTL protein homolog 3
2	204321472	204322036	Zm00001d006316
2	204901088	204902529	Zm00001d006331		description=sequence-specific DNA binding transcription factors
2	204951629	204962354	Zm00001d006336
2	205435734	205439727	Zm00001d006353		description=basic helix-loop-helix (bHLH) DNA-binding superfamily protein
2	205440510	205444726	Zm00001d006354		description=F22G5.33
2	205866818	205869808	Zm00001d006368		description=NEP1-interacting protein-like 1
2	206057451	206060931	Zm00001d006374		description=Probable inactive purple acid phosphatase 1
2	206340126	206342990	Zm00001d006386		description=AP-3 complex subunit mu
2	206397414	206403110	Zm00001d006389		description=small G protein family protein / RhoGAP family protein
2	206594345	206597312	Zm00001d006400		description=Whole genome shotgun sequence of line PN40024 scaffold_7.assembly12x (Fragment)
2	207291140	207302436	Zm00001d006417		description=RING/U-box superfamily protein
2	208457127	208458693	Zm00001d006446	Name=salmon silk2	description= salmon silk2
2	208705755	208713297	Zm00001d006453		description=Protein LAZ1
2	208855966	208856205	Zm00001d006458
2	208880307	208885292	Zm00001d006460
2	208886176	208891521	Zm00001d006461		description=SH3 domain-containing protein 3
2	210172903	210177759	Zm00001d006508		description=Glutamate receptor 3.4
2	210204093	210207784	Zm00001d006511		description=Glucose-6-phosphate/phosphate translocator 2 chloroplastic
2	216335689	216336837	Zm00001d006768		description=C2H2-like zinc finger protein
2	216440947	216443099	Zm00001d006776		description=PLASMODESMATA CALLOSE-BINDING PROTEIN 2
2	216441175	216443099	Zm00001d006777		description=PLASMODESMATA CALLOSE-BINDING PROTEIN 2
3	5918558	5920805	Zm00001d039497		description=Chaperone protein ClpC1 chloroplastic
3	8291514	8292125	Zm00001d039581	Name=CCAAT-HAP5-transcription factor 515	description=Histone-like transcription factor and archaeal histone family protein
3	12344885	12347351	Zm00001d039697		description=Cytochrome P450 monooxygenase
3	15918978	15922548	Zm00001d039824		description=LRR receptor-like serine/threonine-protein kinase EFR
3	15958238	15958636	Zm00001d039825
3	15959937	15961252	Zm00001d039826
3	17168377	17172935	Zm00001d039866		description=Triosephosphate isomerase
3	19237764	19238975	Zm00001d039914		description=Metallothionein-like protein type 2
3	25498657	25500782	Zm00001d040060		description=Glycosyltransferase family 61 protein
3	28212133	28213976	Zm00001d040115		description=protein kinase domain containing protein expressed
3	28534287	28540068	Zm00001d040125	Name=phosphate transporter1	description= phosphate transporter1
3	131645616	131647820	Zm00001d041650		description=Probable U3 small nucleolar RNA-associated protein 11
3	148104806	148106056	Zm00001d042035		description=Probable sarcosine oxidase
3	148431159	148436886	Zm00001d042042		description=RNA-binding (RRM/RBD/RNP motifs) family protein
3	148711910	148719506	Zm00001d042052		description=NAD kinase 1
3	149256346	149257083	Zm00001d042060		description=AT-hook motif nuclear-localized protein 17
3	149398826	149402844	Zm00001d042064		description=Amidohydrolase family
3	150550308	150552046	Zm00001d042094		description=Plant calmodulin-binding protein-related
3	150585101	150586111	Zm00001d042095	Name=glutathione transferase29	description= glutathione transferase29
3	150720597	150721538	Zm00001d042102	Name=glutathione transferase28	description= glutathione transferase28
3	151474798	151475769	Zm00001d042114
3	151579257	151583452	Zm00001d042120
3	152132770	152140284	Zm00001d042125		description=Cytosolic sulfotransferase 17
3	153382173	153383674	Zm00001d042142		description=Probable inactive purple acid phosphatase 16
3	153590919	153598342	Zm00001d042147
3	155049300	155049680	Zm00001d042173
3	155271484	155274696	Zm00001d042182
3	155486059	155497682	Zm00001d042189		description=Potassium transporter 3
3	155497849	155510546	Zm00001d042191		description=catalytics
3	155540894	155542431	Zm00001d042192		description=2-oxoglutarate (2OG) and Fe(II)-dependent oxygenase superfamily protein
3	155843175	155843714	Zm00001d042196	Name=CCAAT-DR1-transcription factor 2	description=Nuclear transcription factor Y subunit B-4
3	156030658	156033522	Zm00001d042202		description=Protein indeterminate-domain 11
3	156117264	156118521	Zm00001d042210		description=Esterase PIR7A
3	156317221	156318186	Zm00001d042214		description=Protein SRC2 homolog
3	156522883	156523445	Zm00001d042217		description=FPF1-like protein 1
3	156802050	156804169	Zm00001d042225		description=Heavy metal transport/detoxification superfamily protein
3	157369712	157375209	Zm00001d042244		description=Potasium ion uptake permease 1
3	157560975	157565462	Zm00001d042256		description=Protein kinase superfamily protein
3	157565559	157567207	Zm00001d042257		description=Photosynthetic NDH subunit of subcomplex B 5 chloroplastic
3	157658884	157666005	Zm00001d042258		description=RING finger protein
3	157665994	157677732	Zm00001d042259		description=Prefoldin chaperone subunit family protein
3	157879476	157881240	Zm00001d042260		description=Chloroplastic quinone-oxidoreductase
3	157976446	157978862	Zm00001d042263	Name=bHLH-transcription factor 175	description=Inducer of CBF expression 2
3	158098798	158103660	Zm00001d042267	Name=ARF-transcription factor 10	description=Auxin response factor 10
3	158557916	158563258	Zm00001d042275		description=Phosphatidylinositol transfer protein CSR1
3	158616071	158617405	Zm00001d042277		description=Proline iminopeptidase
3	158631062	158636654	Zm00001d042278		description=Phytanoyl-CoA dioxygenase
3	160028234	160029208	Zm00001d042305	Name=TCP-transcription factor 8	description=Transcription factor TCP11
3	161221006	161222988	Zm00001d042323		description=40S ribosomal protein S7-2
3	161289071	161290297	Zm00001d042325		description=Expressed protein%3B protein
3	161628409	161632125	Zm00001d042333		description=Exostosin-like
3	161937958	161939578	Zm00001d042337		description=Nucleotide-diphospho-sugar transferase family protein
3	162369545	162373955	Zm00001d042347
3	163203413	163204855	Zm00001d042361		description=Wiscott-Aldrich syndrome%252C C-terminal
3	163979027	163980188	Zm00001d042381		description=EPIDERMAL PATTERNING FACTOR-like protein 9
3	164249419	164250498	Zm00001d042388		description=DUF538 family protein
3	164745457	164749045	Zm00001d042400
3	166271437	166276507	Zm00001d042410
3	166285242	166287298	Zm00001d042411		description=Protein DETOXIFICATION 42
3	166637966	166639387	Zm00001d042420		description=Lipoprotein
3	167224209	167226786	Zm00001d042438		description=Proline transporter 2
3	167612707	167616683	Zm00001d042443		description=BTB/POZ and TAZ domain-containing protein 2
3	167821561	167825000	Zm00001d042445	Name=terminal ear1	description=Protein terminal ear1
3	168081519	168087932	Zm00001d042447	Name=JUMONJI-transcription factor 18	description=Lysine-specific demethylase REF6
3	168092677	168093811	Zm00001d042449		description=BCL-2 binding anthanogene-1
3	168475311	168480286	Zm00001d042460	Name=ABI3-VP1-transcription factor 31	description=B3 domain-containing protein
3	168478175	168480329	Zm00001d042461	Name=GRMZM2G177227	description=Leucine zipper protein-like
3	168999383	169003373	Zm00001d042476		description=Acid phosphatase/vanadium-dependent haloperoxidase-related protein
3	170268292	170271282	Zm00001d042511		description=Ribonuclease 2
3	171277704	171281453	Zm00001d042540		description=Linoleate 9S-lipoxygenase 1
3	171421717	171425401	Zm00001d042541	Name=lipoxygenase1	description= lipoxygenase2
3	171453361	171457431	Zm00001d042543		description=Putative metallophosphoesterase
3	172481064	172485130	Zm00001d042578	Name=barley mlo defense gene homolog5	description= barley mlo defense gene homolog5
3	172642954	172645804	Zm00001d042580	Name=NAC-transcription factor 95	description=NAC domain-containing protein 35
3	173074810	173078927	Zm00001d042596		description=alpha/beta-Hydrolases superfamily protein
3	173181470	173184013	Zm00001d042603
3	173369583	173370041	Zm00001d042607
3	174098876	174100586	Zm00001d042620		description=NAD(P)H-quinone oxidoreductase subunit N chloroplastic
3	174359812	174361198	Zm00001d042624		description=Probable pectinesterase/pectinesterase inhibitor 51
3	174362235	174362897	Zm00001d042625		description=Pectinesterase
3	174609009	174610682	Zm00001d042631		description=DUF506 family protein
3	174745782	174748840	Zm00001d042634		description=Extradiol ring-cleavage dioxygenase
3	174783851	174785941	Zm00001d042636		description=Amino acid permease 6
3	174787067	174792369	Zm00001d042637		description=Leucine-rich receptor-like protein kinase family protein
3	174982548	174991140	Zm00001d042640		description=SnRK1-interacting protein 1
3	175041489	175047517	Zm00001d042641		description=RNA-binding (RRM/RBD/RNP motifs) family protein
3	175714011	175716871	Zm00001d042658		description=Adenine nucleotide alpha hydrolases-like superfamily protein
3	176820832	176823217	Zm00001d042684		description=Protein NRT1/ PTR FAMILY 5.10
3	176827382	176830753	Zm00001d042685	Name=glutamate-oxaloacetate transaminase4	description= glutamate-oxaloacetate transaminase4
3	177204037	177208754	Zm00001d042692		description=Protein TRANSPARENT TESTA 12
3	177266069	177275631	Zm00001d042694		description=Putative ion channel protein POLLUX
3	177276266	177281835	Zm00001d042695	Name=SnRK2 serine threonine protein kinase 4	description=Serine/threonine-protein kinase SRK2A
3	177338945	177341399	Zm00001d042697	Name=photosystem II subunit PsbS1	description= photosystem II subunit PsbS1
3	177609579	177634652	Zm00001d042706		description=ARM repeat superfamily protein
3	178074957	178082659	Zm00001d042714		description=Protein S-acyltransferase 8
3	178114275	178120637	Zm00001d042718		description=Protein LIKE COV 2
3	178253843	178256630	Zm00001d042727		description=Fructose-16-bisphosphatase cytosolic
3	178593832	178600238	Zm00001d042740		description=UDP-glycosyltransferase 91A1
3	178870576	178871292	Zm00001d042749		description=Protein YLS9
3	178989961	179001319	Zm00001d042755
3	179140820	179142662	Zm00001d042767		description=Glucan endo-13-beta-glucosidase 14
3	179148169	179149074	Zm00001d042768		description=Hevamine-A
3	179902053	179907809	Zm00001d042794		description=Transducin/WD40 repeat-like superfamily protein
3	180214691	180217092	Zm00001d042800		description=Protein BUD31-like protein 1
3	180955995	180958405	Zm00001d042812		description=Tetratricopeptide repeat (TPR)-like superfamily protein
3	181000679	181003338	Zm00001d042813		description= glycerol-3-phosphosphate acyltransferase1
3	181361430	181364498	Zm00001d042828
3	181377889	181379729	Zm00001d042830	Name=MYB-transcription factor 34	description=Duplicated homeodomain-like superfamily protein
3	181893969	181898076	Zm00001d042846		description=Reticulon-like protein B12
3	190100184	190103976	Zm00001d043144		description=Calmodulin-7
3	194900609	194905330	Zm00001d043295		description=Myosin-binding protein 1
3	194966876	194977775	Zm00001d043296		description=zinc knuckle (CCHC-type) family protein
3	196108164	196109882	Zm00001d043314		description=Mal d 1-associated protein
3	197018782	197019318	Zm00001d043338
3	197028752	197029747	Zm00001d043340
3	197238680	197239330	Zm00001d043346		description=Probable calcium-binding protein CML41
3	197706877	197708271	Zm00001d043361		description=PLASMODESMATA CALLOSE-BINDING PROTEIN 2
3	197783227	197783640	Zm00001d043367
3	197856616	197857467	Zm00001d043368	Name=TCP-transcription factor 30	description=TCP family transcription factor containing protein
3	198236667	198237919	Zm00001d043380		description=Protein CHLORORESPIRATORY REDUCTION 7 chloroplastic
3	198588278	198589171	Zm00001d043390		description=delay of germination 1
3	198729408	198730004	Zm00001d043399
3	198764862	198766666	Zm00001d043400
3	199094453	199105329	Zm00001d043418		description=La-related protein 6A
3	199107176	199108703	Zm00001d043419
3	199156004	199157305	Zm00001d043421
3	199284014	199285462	Zm00001d043423		description=Transcription factor TCP4
3	199386458	199395287	Zm00001d043425
3	199479040	199481034	Zm00001d043426		description=Pentatricopeptide repeat-containing protein
3	199604217	199605056	Zm00001d043430
3	199979127	199987549	Zm00001d043441		description=Dolichyl-diphosphooligosaccharide--protein glycosyltransferase subunit STT3A
3	200352833	200354707	Zm00001d043444		description=plant-specific domain TIGR01615 family protein expressed
3	200377050	200383360	Zm00001d043445		description=Dihydroorotase
3	200386689	200387207	Zm00001d043447		description=Serine/threonine protein phosphatase 2A 59 kDa regulatory subunit B' eta isoform
3	200983578	200984279	Zm00001d043467		description=LysM domain-containing GPI-anchored protein 1
3	201448887	201454662	Zm00001d043477	Name=cellulose synthase13	description= cellulose synthase 11
3	201664309	201667350	Zm00001d043489		description=alpha/beta-Hydrolases superfamily protein
3	201681540	201682688	Zm00001d043491	Name=AP2-EREBP-transcription factor 134	description=Ethylene-responsive transcription factor 2
3	202108115	202110140	Zm00001d043503		description=downstream target of AGL15-4
3	202110773	202122188	Zm00001d043504		description=P-loop nucleoside triphosphate hydrolases superfamily protein with CH (Calponin Homology) domain
3	202337387	202341138	Zm00001d043510		description=IQ-domain 25
3	202361988	202365947	Zm00001d043512		description=Protein kinase family protein with leucine-rich repeat domain
3	202396755	202399107	Zm00001d043515	Name=Aux/IAA-transcription factor 12	description=IAA6-auxin-responsive Aux/IAA family member
3	202661050	202663881	Zm00001d043520		description=DUF1005 family protein
3	202712631	202713672	Zm00001d043523		description=Profilin
3	202956954	202962267	Zm00001d043529		description=Pentatricopeptide repeat-containing protein chloroplastic
3	203077676	203078698	Zm00001d043535	Name=OVATE-transcription factor 18
3	203306425	203315268	Zm00001d043539		description=NADPH reductase TAH18
3	203599024	203599605	Zm00001d043550		description=RING-H2 finger protein ATL67
3	203821009	203833894	Zm00001d043560		description=Ubiquitin-like-specific protease 1D
3	204234233	204243376	Zm00001d043571		description=DNAJ heat shock N-terminal domain-containing protein
3	204415200	204420368	Zm00001d043581		description=Subtilisin-like protease SBT5.6
3	204438188	204438472	Zm00001d043586
3	204481997	204484157	Zm00001d043588		description=Protodermal factor 1
3	204487153	204491765	Zm00001d043589	Name=MADS-transcription factor 36	description=Floral homeotic protein APETALA 3
3	204722247	204732334	Zm00001d043598		description=ABC transporter G family member 29
3	204834526	204840906	Zm00001d043599		description=ABC transporter B family member 15
3	205115325	205115651	Zm00001d043610
3	205152631	205154600	Zm00001d043612		description=Protein MARD1
3	205274303	205276402	Zm00001d043615		description=Metal ion binding protein
3	205316343	205317768	Zm00001d043616		description=alpha/beta-Hydrolases superfamily protein
3	205574876	205576863	Zm00001d043628	Name=ketol-acid reductoisomerase1	description=Ketol-acid reductoisomerase chloroplastic
3	206061769	206065885	Zm00001d043652		description=Probable choline kinase 2
3	206109880	206114964	Zm00001d043655		description=Protein IQ-DOMAIN 31
3	206991601	206992551	Zm00001d043674		description=Cytidine deaminase
3	207108567	207109976	Zm00001d043680		description=Phospholipase A1-IIdelta
3	207383949	207390114	Zm00001d043686		description=Survival protein SurE-like phosphatase/nucleotidase
3	207541295	207543989	Zm00001d043691		description=IQ-domain 6
3	207545558	207548378	Zm00001d043692		description=Cytokinin riboside 5'-monophosphate phosphoribohydrolase LOG8
3	207872999	207876887	Zm00001d043701		description=IAA-amino acid hydrolase ILR1-like 4
3	207877586	207877774	Zm00001d043702		description=Arabinogalactan peptide 3
3	207917857	207926660	Zm00001d043705	Name=p15 (PC4 Sub1)-transcription factor 1	description=RNA polymerase II transcriptional coactivator KELP
3	208692615	208694505	Zm00001d043735		description=Bidirectional sugar transporter SWEET2
3	208800675	208802444	Zm00001d043740		description=Mitogen-activated protein kinase kinase kinase YODA
3	208812098	208813525	Zm00001d043741		description=NPK1-related protein kinase-like protein
3	209087178	209088617	Zm00001d043752		description=UDP-glycosyltransferase 88A1
3	209128726	209130078	Zm00001d043757		description=Nuclear pore complex protein NUP50A
3	209626178	209629716	Zm00001d043771		description=Putative phosphoethanolamine N-methyltransferase
3	210069089	210070258	Zm00001d043782	Name=AP2-EREBP-transcription factor 126	description=DNA-binding protein RAV1
3	210237044	210238359	Zm00001d043787	Name=glutathione transferase20	description=Glutathione S-transferase GSTU6
3	210370495	210371606	Zm00001d043795		description=Glutathione S-transferase GSTU6
3	210461398	210469715	Zm00001d043800		description=LEAF RUST 10 DISEASE-RESISTANCE LOCUS RECEPTOR-LIKE PROTEIN KINASE-like 1.1
3	218269726	218271105	Zm00001d044068		description=Molybdate transporter 2
3	218419001	218419411	Zm00001d044076
3	218445281	218446520	Zm00001d044079		description=Tat pathway signal sequence family protein
3	218481322	218485402	Zm00001d044081	Name=Homeobox-transcription factor 46	description=Homeobox-leucine zipper protein ATHB-4
3	218523216	218528077	Zm00001d044083	Name=PIN-formed protein10	description= PIN-formed protein10
3	221810833	221813930	Zm00001d044204		description=Probable UDP-N-acetylglucosamine--peptide N-acetylglucosaminyltransferase SEC
3	222762009	222770043	Zm00001d044239		description=RING/U-box superfamily protein
3	227713190	227714813	Zm00001d044426		description=DnaJ-like protein
3	227745442	227748823	Zm00001d044430		description=Amino-acid permease BAT1
3	234240308	234240823	Zm00001d044659
3	234295985	234296843	Zm00001d044662	Name=ZF-HD-transcription factor 9	description=ZHD9 ZF-HD type transcription factor
3	234416397	234417575	Zm00001d044666	Name=FHA-transcription factor 9	description=SMAD/FHA domain-containing protein
3	234427651	234431985	Zm00001d044667	Name=C3H-transcription factor 348	description=Nucleic acid binding protein
4	818674	819621	Zm00001d048590		description=Probable transcriptional regulator RABBIT EARS
4	921608	923738	Zm00001d048593	Name=RUBISCO activase2	description= RUBISCO activase2
4	1045391	1047319	Zm00001d048601	Name=GRAS-transcription factor 68	description=GRAS transcription factor [Source:UniProtKB/TrEMBL%3BAcc:K7U8D1]
4	1519872	1524402	Zm00001d048621		description=ABC transporter G family member 11
4	3672327	3674403	Zm00001d048705	Name=benzoxazinone synthesis5	description= benzoxazinone synthesis5
4	10376067	10385318	Zm00001d048944		description=GTP-binding protein hflX
4	10671837	10673065	Zm00001d048957
4	10895869	10902242	Zm00001d048962		description=Leucine-rich receptor-like protein kinase family protein
4	11451926	11462159	Zm00001d048982		description=Retrovirus-related Pol polyprotein LINE-1
4	11477239	11480232	Zm00001d048983		description=Expressed protein%3B protein
4	12010181	12012169	Zm00001d048998		description=Chlorophyll a-b binding protein CP26 chloroplastic
4	12383791	12387641	Zm00001d049008		description=Apyrase 1
4	12389410	12392838	Zm00001d049009		description=Calcium-transporting ATPase 2
4	12471307	12476663	Zm00001d049011		description=Polyketide cyclase/dehydrase and lipid transport superfamily protein
4	13160111	13161601	Zm00001d049033
4	14013935	14018030	Zm00001d049053
4	14333136	14336565	Zm00001d049059	Name=alcohol dehydrogenase2	description= alcohol dehydrogenase2
4	15350338	15355296	Zm00001d049081
4	15960712	15964223	Zm00001d049097		description=saposin B domain-containing protein
4	16088328	16089397	Zm00001d049101		description=Probable ubiquitin-conjugating enzyme E2 25
4	16138690	16139427	Zm00001d049103		description=Cysteine/Histidine-rich C1 domain family protein
4	16170775	16174409	Zm00001d049107
4	16707652	16709604	Zm00001d049120
4	16727125	16737572	Zm00001d049121		description=Disease resistance protein RPM1
4	16740511	16742220	Zm00001d049122		description=Tetratricopeptide-like helical
4	17366184	17386441	Zm00001d049138		description=ATP-dependent protease La (LON) domain protein
4	17892779	17899598	Zm00001d049152	Name=pep-related development arrested1 homolog	description= pep-related development arrested1 homolog
4	18471513	18478652	Zm00001d049161		description=11-beta-hydroxysteroid dehydrogenase-like 5
4	18524687	18525670	Zm00001d049162		description=Expressed protein%3B protein
4	19153020	19159545	Zm00001d049174	Name=lazy plant1	description= lazy plant1
4	19409404	19410924	Zm00001d049179	Name=benzoxazinone synthesis7	description=O-methyltransferase ZRP4
4	20300477	20302033	Zm00001d049201		description=Putative cytochrome P450 superfamily protein
4	21165647	21166729	Zm00001d049218		description=Two-pore potassium channel 1
4	21693569	21695246	Zm00001d049226		description=Glycosyl hydrolase family protein with chitinase insertion domain
4	21757596	21759238	Zm00001d049228		description=Putative membrane lipoprotein
4	22485112	22485966	Zm00001d049242
4	22587096	22588289	Zm00001d049244		description=Putative IQ calmodulin-binding and BAG domain containing family protein
4	22858123	22862808	Zm00001d049250		description=Protein kinase superfamily protein
4	23413468	23419096	Zm00001d049259		description=Long chain base biosynthesis protein 2a
4	23695704	23697745	Zm00001d049266
4	24150377	24154043	Zm00001d049276		description=Serine carboxypeptidase-like 46
4	24420976	24426546	Zm00001d049286		description=LRR receptor-like serine/threonine-protein kinase EFR
4	24643059	24644573	Zm00001d049292		description=UDP-glycosyltransferase 73D1
4	25700883	25701458	Zm00001d049308
4	26910739	26922418	Zm00001d049333		description=Alba DNA/RNA-binding protein
4	27315744	27316583	Zm00001d049347		description=Zinc finger protein CONSTANS-LIKE 5
4	27738168	27740863	Zm00001d049355
4	28009164	28011626	Zm00001d049367		description=Histone acetyltransferase type B catalytic subunit
4	28145299	28147754	Zm00001d049375		description=Zinc transporter 3
4	28588202	28591027	Zm00001d049384		description=Transcription factor ILR3
4	28605301	28606526	Zm00001d049387		description= photosystem II3
4	29598344	29599729	Zm00001d049408		description=Pentatricopeptide repeat (PPR) superfamily protein
4	30358010	30361359	Zm00001d049440		description=CRS2-associated factor 2 mitochondrial
4	31325915	31327059	Zm00001d049464		description=B-box type zinc finger family protein
4	31448746	31454292	Zm00001d049471	Name=meiotic recombination protein 11 homolog B	description=MRE11B
4	31734764	31741600	Zm00001d049480		description=Somatic embryogenesis receptor kinase 2
4	32889820	32894110	Zm00001d049511	Name=G2-like-transcription factor 22	description=Putative MYB DNA-binding domain superfamily protein
4	33186410	33189186	Zm00001d049525		description=LOL1%253B LOL1 isoform 1%253B LOL1 isoform 2
4	33446172	33447835	Zm00001d049532
4	33796845	33798491	Zm00001d049539		description=FAD-binding Berberine family protein
4	34070590	34104400	Zm00001d049543	Name=circadian clock associated1	description= circadian clock associated1
4	34206911	34208549	Zm00001d049544		description=UDP-glycosyltransferase 83A1
4	34263956	34265285	Zm00001d026785
4	34264078	34264647	Zm00001d049545		description=RING/U-box superfamily protein
4	34264684	34265289	Zm00001d026786
4	35620656	35625333	Zm00001d049571		description=TMPIT-like protein
4	35943977	35947765	Zm00001d049579		description=Tyrosine--tRNA ligase 1 cytoplasmic
4	37970635	37973407	Zm00001d049624		description=Magnesium transporter CorA-like family protein
4	38206611	38211306	Zm00001d049636		description=Pre-mRNA-splicing factor SLU7-A
4	38547753	38551529	Zm00001d049640		description=Lysine histidine transporter 2
4	38759286	38759876	Zm00001d049650		description=Photosystem II core complex protein psbY
4	38762363	38763520	Zm00001d049651		description=Zinc finger protein CONSTANS-LIKE 7
4	38969055	38969360	Zm00001d049659		description=SAUR31-auxin-responsive SAUR family member
4	40041861	40043916	Zm00001d049686		description=AAA-type ATPase family protein
4	40291183	40292526	Zm00001d049688		description=S-adenosyl-L-methionine-dependent methyltransferases superfamily protein
4	41547724	41551153	Zm00001d049726
4	42289885	42292290	Zm00001d049741		description=Putative lectin-domain receptor-like protein kinase family protein
4	44025043	44043408	Zm00001d049771		description=Peptidase family M48 family protein
4	44633576	44640151	Zm00001d049785		description=Type II inositol polyphosphate 5-phosphatase 15
4	44680194	44685802	Zm00001d049787
4	45457924	45461742	Zm00001d049805
4	46350597	46355118	Zm00001d049822	Name=teosinte glume architecture1	description= teosinte glume architecture1
4	46625882	46630722	Zm00001d049824	Name=neighbor of tga1	description= neighbor of tga1
4	46817825	46823607	Zm00001d049831		description=Nodulin-like protein
4	49828071	49838035	Zm00001d049872		description=ADP-ribosylation factor GTPase-activating protein AGD1
4	51609750	51613147	Zm00001d049905		description=ABC transporter F family member 1
4	53429242	53431331	Zm00001d049926		description=Gibberellin 20 oxidase 2
4	53774270	53775290	Zm00001d049932
4	55307251	55311651	Zm00001d049954		description=Monodehydroascorbate reductase 1 peroxisomal
4	56143059	56144558	Zm00001d049964		description=SIN-like family protein
4	56765844	56767670	Zm00001d049979		description=EMB2733/ESP3 (EMBRYO DEFECTIVE 2733)%3B ATP-dependent RNA helicase
4	57539440	57542819	Zm00001d049989		description=10-deacetylbaccatin III 10-O-acetyltransferase
4	57683950	57685116	Zm00001d049990		description=Clathrin assembly protein%253B Putative ENTH/ANTH/VHS superfamily protein
4	58835355	58837310	Zm00001d050000		description=F-box protein
4	59298545	59300505	Zm00001d050011		description=Alpha carbonic anhydrase 7
4	59929429	59934326	Zm00001d050017		description=Remorin family protein
4	64429643	64432844	Zm00001d050076		description=Leucine-rich repeat family protein
4	65387724	65389604	Zm00001d050095		description=exocyst subunit exo70 family protein D1
4	67238635	67241981	Zm00001d050119		description=Activator of heat shock protein ATPase
4	68202250	68205876	Zm00001d050132	Name=bri1-like receptor kinase3	description= bri1-like receptor kinase3
4	68209203	68220619	Zm00001d050133		description=Homoserine dehydrogenase
4	68237414	68255070	Zm00001d050134	Name=aspartate kinase-homoserine dehydrogenase1	description=Bifunctional aspartokinase/homoserine dehydrogenase 2 chloroplastic
4	69072298	69075609	Zm00001d050145		description=transcription regulators
4	69407277	69429725	Zm00001d050150		description=Adenylate kinase 5 chloroplastic
4	69519897	69526796	Zm00001d050153		description=Reticulon-like protein B21
4	69627916	69629499	Zm00001d050156
4	69708931	69710820	Zm00001d050161		description=SEC14 cytosolic factor family protein / phosphoglyceride transfer family protein
4	71186718	71187311	Zm00001d050180		description=sequence-specific DNA binding transcription factors
4	72526574	72528866	Zm00001d050193		description=60S ribosomal protein L7-2
4	72636377	72637297	Zm00001d050195	Name=WRKY-transcription factor 94	description=Putative WRKY DNA-binding domain superfamily protein
4	72786474	72789077	Zm00001d050196	Name=endo-1%2C3-1%2C4-beta-D-glucanase1	description=alpha/beta-Hydrolases superfamily protein
4	72854696	72856775	Zm00001d050198		description=alpha/beta-Hydrolases superfamily protein
4	139235984	139238663	Zm00001d051056		description=S-adenosylmethionine decarboxylase proenzyme
4	144439743	144440680	Zm00001d051121		description=RmlC-like cupins superfamily protein
4	144683071	144691088	Zm00001d051126		description=Putative SET-domain containing protein family
4	145118778	145122364	Zm00001d051130		description=Long-chain-alcohol oxidase FAO4B
4	145253410	145257735	Zm00001d051132		description=Polyprotein
4	145546078	145549609	Zm00001d051139		description=RNA-binding (RRM/RBD/RNP motifs) family protein
4	146401256	146402641	Zm00001d051156	Name=phosphoenolpyruvate carboxylase kinase2	description=Putative phosphoenolpyruvate carboxylase kinase family protein
4	146405890	146410901	Zm00001d051157		description=Adenosine kinase 2
4	146793740	146798809	Zm00001d051163	Name=phenylalanine ammonia lyase5	description= phenylalanine ammonia lyase5
4	146846109	146848259	Zm00001d051166		description= phenylalanine ammonia lyase4
4	148148821	148150740	Zm00001d051194		description=Arginine decarboxylase
4	148675866	148680836	Zm00001d051206		description=Serine carboxypeptidase-like 34
4	148970275	148970931	Zm00001d051216	Name=TCP-transcription factor 25	description=TCP-domain protein
4	149062470	149063624	Zm00001d051223		description=Putative GEM-like protein 8
4	149499913	149502215	Zm00001d051235
4	150196592	150200033	Zm00001d051244		description=Ankyrin repeat-containing protein
4	150348649	150352758	Zm00001d051246		description=(+)-neomenthol dehydrogenase
4	150498265	150503275	Zm00001d051249		description=Elicitor-responsive protein 3
4	151028968	151030729	Zm00001d051262	Name=LIM-transcription factor 8	description=LIM domain-containing protein PLIM2b
4	151309707	151312076	Zm00001d051269	Name=MYB-transcription factor 103	description=myb domain protein 17
4	152560547	152566694	Zm00001d051306		description=Hsp70-Hsp90 organizing protein 3
4	152948011	152949738	Zm00001d051309		description=B-box zinc finger protein 20
4	153362817	153366616	Zm00001d051316	Name=Trihelix-transcription factor 16	description=Putative homeodomain-like transcription factor superfamily protein isoform 1%253B Putative homeodomain-like transcription factor superfamily protein isoform 2
4	154123980	154127155	Zm00001d051323		description=Probable receptor-like protein kinase
4	154378507	154379055	Zm00001d051325
4	154379490	154379679	ENSRNA049465449	Name=snoZ112	description=Small nucleolar RNA Z112
4	154380191	154380310	ENSRNA049465410	Name=SNORD14	description=Small nucleolar RNA SNORD14
4	154581235	154589610	Zm00001d051328	Name=WRKY-transcription factor 98	description=Putative WRKY DNA-binding domain superfamily protein
4	154980581	154984053	Zm00001d051334		description=HXXXD-type acyl-transferase family protein
4	155253907	155256153	Zm00001d051342		description=Chaperone DnaJ-domain superfamily protein
4	155262275	155263156	Zm00001d051344
4	155450584	155453865	Zm00001d051349
4	155984860	155986408	Zm00001d051362	Name=tonoplast intrinsic protein2	description= tonoplast intrinsic protein2
4	156492223	156492837	Zm00001d051380		description=Probable lipid phosphate phosphatase beta
4	157330998	157334207	Zm00001d051405		description=transmembrane protein
4	157417162	157417430	Zm00001d026920
4	157417342	157417767	Zm00001d051410
4	157604148	157608446	Zm00001d051415		description=Mechanosensitive ion channel protein 6
4	157820475	157822417	Zm00001d051418		description=GDSL esterase/lipase
4	157822997	157827073	Zm00001d051419		description=GSDL-motif protein lipase
4	158063199	158065701	Zm00001d051424		description=Probable serine/threonine-protein kinase Cx32 chloroplastic
4	158717084	158717401	Zm00001d051440
4	158807351	158810855	Zm00001d051442		description=Probable methyltransferase PMT15
4	159031088	159035197	Zm00001d051448		description=Putative RING zinc finger domain superfamily protein
4	159111690	159112469	Zm00001d051451	Name=AP2-EREBP-transcription factor 127	description=Putative AP2/EREBP transcription factor superfamily protein
4	159243303	159244550	Zm00001d051453
4	159541879	159543702	Zm00001d051461	Name=GRAS-transcription factor 76	description=Chitin-inducible gibberellin-responsive protein 2
4	160083460	160084250	Zm00001d051483		description=Putative peptidase C48 domain family protein
4	160463943	160465412	Zm00001d051499		description=OsFBX59 - F-box domain containing protein expressed
4	160468989	160472372	Zm00001d051500		description=Nucleotide-diphospho-sugar transferase family protein
4	160597955	160598830	Zm00001d051505		description=Transposon protein
4	160961176	160963697	Zm00001d051509	Name=bHLH-transcription factor 13	description=Putative HLH DNA-binding domain superfamily protein
4	161345010	161349694	Zm00001d051525		description=Oligopeptide transporter 4
4	161421254	161441845	Zm00001d051526		description=Probable xyloglucan endotransglucosylase/hydrolase protein 30
4	161520154	161525256	Zm00001d051527	Name=G2-like-transcription factor 29	description=Putative MYB DNA-binding domain superfamily protein
4	161594500	161598938	Zm00001d051529		description=Putative AMP-dependent synthetase and ligase superfamily protein
4	161648710	161651033	Zm00001d051532		description=Pentatricopeptide repeat-containing protein
4	161756938	161758313	Zm00001d051534		description=Ubiquitin carboxyl-terminal hydrolase family protein
4	162017524	162021747	Zm00001d051544
4	162063429	162066609	Zm00001d051546		description=ADP-ribosylation factor B1B
4	162529433	162531336	Zm00001d051552		description=3-dehydrosphinganine reductase TSC10B
4	162532245	162537805	Zm00001d051553		description=Rop guanine nucleotide exchange factor 14
4	162654597	162657413	Zm00001d051554	Name=abscisic acid 8'-hydroxylase2	description= abscisic acid 8'-hydroxylase2
4	162737448	162739364	Zm00001d051556	Name=nine-cis-epoxycarotenoid dioxygenase6	description= nine-cis-epoxycarotenoid dioxygenase6
4	162767963	162770959	Zm00001d051561		description=Lipid phosphate phosphatase epsilon 2 chloroplastic
4	162800349	162804413	Zm00001d051562
4	162881281	162886758	Zm00001d051564		description=Soluble inorganic pyrophosphatase 2
4	162887403	162902341	Zm00001d051565		description=Replication factor C subunit 3
4	163295675	163298554	Zm00001d051577	Name=C2C2-Dof-transcription factor 43	description=Dof zinc finger protein DOF2.1
4	163976517	163976981	Zm00001d051591	Name=histone 2B5	description= histone 2B5
4	163978304	163981151	Zm00001d051592
4	164063973	164065253	Zm00001d051598		description=Plant-specific domain TIGR01570 family protein
4	164542041	164543597	Zm00001d051611		description=Groundhog protein 7 [Source:UniProtKB/TrEMBL%3BAcc:B4G1R2]
4	164594515	164602165	Zm00001d051615		description=Putative lectin-domain receptor-like protein kinase family protein
4	164898575	164902989	Zm00001d051617
4	165270581	165276648	Zm00001d051634		description=Ribose-phosphate pyrophosphokinase 4
4	165279657	165288465	Zm00001d051636		description=Delta(12)-fatty-acid desaturase
4	166297438	166306502	Zm00001d051674		description=Phosphatidylinositol/phosphatidylcholine transfer protein SFH13
4	166355030	166357000	Zm00001d051675		description=Transmembrane 9 superfamily member 12
4	166604240	166605598	Zm00001d051681		description=Glycosyltransferase 6
4	166795468	166796103	Zm00001d051689		description=Putative IQ calmodulin-binding and BAG domain containing family protein
4	167044925	167045719	Zm00001d051697	Name=CCAAT-DR1-transcription factor 7	description=Nuclear transcription factor Y subunit B-6
4	167120083	167121336	Zm00001d051699		description=Fasciclin-like arabinogalactan protein 2
4	167361871	167376294	Zm00001d051709
4	168461546	168477601	Zm00001d051733
4	168580085	168580537	Zm00001d051739	Name=bZIP-transcription factor 97	description=Putative bZIP transcription factor superfamily protein
4	168581650	168605013	Zm00001d051740		description=Serine protease SPPA chloroplastic
4	168639313	168641361	Zm00001d051746		description=Calcium sensing receptor chloroplastic
4	168776069	168778157	Zm00001d051749	Name=Homeobox-transcription factor 115	description=Putative homeobox DNA-binding and leucine zipper domain family protein isoform 1%253B Putative homeobox DNA-binding and leucine zipper domain family protein isoform 2
4	168940022	168944865	Zm00001d051756		description=Potassium transporter 8
4	169724582	169725828	Zm00001d051785		description=Protein CURVATURE THYLAKOID 1A chloroplastic
4	169863214	169864538	Zm00001d051788	Name=MYB-transcription factor 142	description=Putative MYB DNA-binding domain superfamily protein
4	169867511	169874521	Zm00001d051789		description=Microtubule motor%253B Putative dynein light chain type 1 family protein
4	169986068	169987353	Zm00001d051799		description=Nudix hydrolase 17 mitochondrial
4	170029713	170030060	Zm00001d051802		description=SAUR-like auxin-responsive protein family
4	170036696	170039992	Zm00001d051804	Name=glutamine synthetase5	description=Glutamine synthetase root isozyme 4
4	170466723	170467738	Zm00001d051817		description=DNA topoisomerase 2
4	171481235	171484117	Zm00001d051829		description=U-box domain-containing protein 44
4	171679681	171683198	Zm00001d051837		description=Sucrose synthase
4	171960302	171965412	Zm00001d051842		description=Zn-dependent hydrolase%252C including glyoxylase
4	173199154	173201246	Zm00001d051877
4	173380092	173380400	Zm00001d051882		description=Ubiquitin carboxyl-terminal hydrolase
4	173753463	173755348	Zm00001d051887		description=Calmodulin-binding receptor-like cytoplasmic kinase 2
4	173809755	173817043	Zm00001d051890		description=Deoxyhypusine hydroxylase
4	174268094	174270471	Zm00001d051905		description=Heavy metal-associated isoprenylated plant protein 3
4	174319008	174320624	Zm00001d051908		description=OSIGBa0147B06.5 protein
4	174701525	174702881	Zm00001d051923		description=GDSL esterase/lipase LTL1
4	174841809	174843540	Zm00001d051934		description=5-pentadecatrienyl resorcinol O-methyltransferase
4	174850059	174851958	Zm00001d051936		description=F-box protein PP2-B10
4	174979279	174979605	Zm00001d051944
4	175173796	175186520	Zm00001d051952		description=CRIB domain-containing protein RIC5
4	175533333	175533983	Zm00001d026941
4	175533999	175534739	Zm00001d051966		description=Protein LIGHT-DEPENDENT SHORT HYPOCOTYLS 3
4	176010821	176012026	Zm00001d051989
4	176012100	176016408	Zm00001d051990		description=Hydroxyproline-rich glycoprotein family protein
4	176412462	176414889	Zm00001d052010		description=Calcineurin subunit B
4	176587506	176587964	Zm00001d052015		description=Serine-rich protein
4	176597115	176600543	Zm00001d052018	Name=DBP-transcription factor 1	description=Probable protein phosphatase 2C 22
4	176653254	176654594	Zm00001d052020		description=beta-12-N-acetylglucosaminyltransferase II
4	176831275	176832132	Zm00001d052025		description=60S ribosomal protein L39
4	176969141	176972630	Zm00001d052033		description=OSJNBb0045P24.5 protein
4	177028520	177029881	Zm00001d052034		description=Thioredoxin H-type 2
4	177078013	177079956	Zm00001d052040		description=Cytochrome c oxidase copper chaperone%253B Cytochrome c oxidase copper chaperone isoform 1%253B Cytochrome c oxidase copper chaperone isoform 2
4	177899414	177900969	Zm00001d052054		description=sequence-specific DNA binding transcription factors
4	178019071	178023237	Zm00001d052060	Name=trehalose-6-phosphate synthase10	description= trehalose-6-phosphate synthase10
4	178253242	178258451	Zm00001d052063		description=Transmembrane amino acid transporter family protein
4	178304940	178308282	Zm00001d052067	Name=serine-threonine kinase3	description=Protein kinase protein with adenine nucleotide alpha hydrolases-like domain
4	178749028	178755925	Zm00001d052076		description=Tetraspanin-2
4	178764555	178775799	Zm00001d052079	Name=lysine-ketoglutarate reductase/saccharopine dehydrogenase1	description=Lysine-ketoglutarate reductase/saccharopine dehydrogenase1
4	179493241	179494121	Zm00001d052097		description=uncharacterized protein [Source:UniProtKB/TrEMBL%3BAcc:B6TV05]
4	179762490	179768842	Zm00001d052106
4	180320647	180322171	Zm00001d052123		description=Thioredoxin-like 5
4	180352140	180355253	Zm00001d052124		description=Putative DUF231 domain containing family protein
4	180558735	180563266	Zm00001d052133	Name=Homeobox-transcription factor 83	description=Homeodomain leucine zipper family IV protein%253B Putative homeobox/lipid-binding domain family protein
4	181353441	181354229	Zm00001d052152	Name=AP2-EREBP-transcription factor 13	description=Putative AP2/EREBP transcription factor superfamily protein
4	181429730	181431252	Zm00001d052154		description=Putative RING zinc finger domain superfamily protein
4	181552538	181556093	Zm00001d052164		description=Ferredoxin--nitrite reductase chloroplastic
4	181552730	181556339	Zm00001d052165	Name=nitrite reductase2	description= nitrite reductase2
4	181660209	181663641	Zm00001d052170		description=Galactoside 2-alpha-L-fucosyltransferase
4	181669343	181670553	Zm00001d052171		description=Cell number regulator 1
4	181715802	181717531	Zm00001d052174	Name=cyclin-dependent kinase inhibitor6	description=Cyclin-dependent kinase inhibitor 1
4	181724426	181727817	Zm00001d052176
4	182061665	182062405	Zm00001d052182
4	182772609	182773786	Zm00001d052194	Name=heat shock protein22	description=23.6 kDa heat shock protein mitochondrial
4	183184901	183186308	Zm00001d052201		description=Probable magnesium transporter NIPA8
4	183190874	183196421	Zm00001d052202		description=Oxysterol-binding protein-related protein 3B
4	183366422	183368190	Zm00001d052210		description=UDP-glycosyltransferase 85A7
4	183515085	183516581	Zm00001d052216	Name=ribosomal protein L29	description= ribosomal protein L29
4	184184459	184186027	Zm00001d052234
4	184373518	184374270	Zm00001d052242		description=ATP synthase subunit delta chloroplastic
4	184611231	184665800	Zm00001d052245		description=Exocyst complex component SEC6
4	184794380	184795486	Zm00001d052252		description=Glutaredoxin family protein
4	185249435	185254161	Zm00001d052266		description=S-adenosyl-L-methionine-dependent methyltransferases superfamily protein
4	185272328	185272541	ENSRNA049467153	Name=MIR169_2	description=microRNA MIR169_2
4	185371637	185375098	Zm00001d052269	Name=PIN-formed protein3	description=Putative auxin efflux carrier
4	187010485	187013768	Zm00001d052318		description=Putative DUF231 domain containing family protein
4	187330814	187332060	Zm00001d052333		description=Hypoxia-responsive family protein
4	187795917	187820518	Zm00001d052348		description=Cysteine-rich receptor-like protein kinase 26
4	187871447	187872521	Zm00001d052351		description=Coatomer subunit beta'-3
4	188298857	188304297	Zm00001d052362
4	188309258	188309908	Zm00001d052365	Name=AP2-EREBP-transcription factor 155	description=Putative AP2/EREBP transcription factor superfamily protein
4	188392275	188393223	Zm00001d052371		description=Protein LURP-one-related 8
4	188988474	188990386	Zm00001d052392		description=TRAF-like superfamily protein
4	189029262	189037143	Zm00001d052393		description=Os01g0536600 protein
4	189052994	189054170	Zm00001d052394		description=Os01g0536600 protein
4	189093521	189098209	Zm00001d052396	Name=ZF-HD-transcription factor 18	description=Pentatricopeptide repeat-containing protein
4	189190071	189194808	Zm00001d052405	Name=WRI1 transcription factor2	description= WRI1 transcription factor2
4	189733493	189734148	Zm00001d052424		description= protein%3B Pectinesterase inhibitor domain containing protein expressed
4	189873712	189877696	Zm00001d052434	Name=major facilitator superfamily defense2	description= major facilitator superfamily defense2
4	189981671	189987040	Zm00001d052435		description=Probable peptide/nitrate transporter
4	190503131	190505583	Zm00001d052464	Name=GRAS-transcription factor 13	description=Scarecrow-like protein 3
4	190740161	190743671	Zm00001d052471		description=Protein STRICTOSIDINE SYNTHASE-LIKE 2
4	190894833	190896279	Zm00001d052480		description=Indole-3-acetate beta-glucosyltransferase
4	191250808	191252184	Zm00001d052492		description=Anthocyanidin 3-O-glucoside 2'''-O-xylosyltransferase
4	191343386	191345393	Zm00001d052493		description=Aluminium induced protein with YGL and LRDR motifs
4	191500962	191502109	Zm00001d052500		description=Phytosulfokines 2
4	191906915	191908417	Zm00001d052513		description=PAN domain-containing protein
4	191958402	191959679	Zm00001d052518		description=Pollen Ole e 1 allergen and extensin family protein
4	192322072	192323862	Zm00001d052530		description=Cytochrome P450 94C1
4	192501575	192501838	Zm00001d052534
4	193327563	193330318	Zm00001d052565
4	193545827	193587771	Zm00001d052584		description=Protein kinase domain containing protein expressed
4	194213915	194214238	Zm00001d052594
4	194257728	194258862	Zm00001d052595	Name=ribulose bisphosphate carboxylase small subunit1	description=Ribulose bisphosphate carboxylase small chain%252C chloroplastic
4	194574641	194575159	Zm00001d052609		description=Expressed protein%3B protein
4	194772400	194778428	Zm00001d052613		description=5'-3' exoribonuclease 3
4	195316205	195318961	Zm00001d052630		description=Pentatricopeptide repeat (PPR) superfamily protein
4	195500434	195501450	Zm00001d052639		description=Putative RING zinc finger domain superfamily protein
4	195562366	195563256	Zm00001d052640		description=Putative RING zinc finger domain superfamily protein
4	196019083	196022515	Zm00001d052654		description=Germin-like protein subfamily 3 member 4
4	196294664	196295872	Zm00001d052662		description=C2 domain protein
4	196893203	196896534	Zm00001d052673	Name=colorless2	description=Chalcone synthase C2
4	196963480	196969861	Zm00001d052675		description=Type III polyketide synthase B
4	197047799	197050973	Zm00001d052678		description=Succinate dehydrogenase assembly factor 2 mitochondrial
4	197106177	197117342	Zm00001d052680	Name=GNAT-transcription factor 20	description=Putative acyl-CoA N-acyltransferases (NAT) family protein
4	197650460	197663462	Zm00001d052695		description=Retinoblastoma-related protein 1
4	198046859	198048753	Zm00001d052699
4	198407129	198409355	Zm00001d052713		description=Putative calcium-dependent protein kinase family protein
4	198623918	198625685	Zm00001d052719		description=60S ribosomal protein L7-1
4	198787191	198796324	Zm00001d052721		description=Ubiquitin family protein
4	199113827	199127980	Zm00001d052726		description=ABC transporter G family member 34
4	199132015	199137288	Zm00001d052727		description=C2 and GRAM domain-containing protein
4	199254071	199256122	Zm00001d052731		description=Pyridoxal phosphate (PLP)-dependent transferases superfamily protein
4	199404178	199405434	Zm00001d052738	Name=HSF-transcription factor 7	description=Heat stress transcription factor B-2b
4	199478963	199481434	Zm00001d052741		description=NC domain-containing protein-related
4	201124962	201130788	Zm00001d052792		description=Putative O-Glycosyl hydrolase superfamily protein
4	201941630	201942553	Zm00001d052818		description=Fasciclin-like arabinogalactan protein 2
4	201961773	201962576	Zm00001d052819		description=Fasciclin-like arabinogalactan protein 10
4	202385873	202394624	Zm00001d052840		description=Phosphatidylinositol/phosphatidylcholine transfer protein SFH13
4	202584989	202599532	Zm00001d052851		description=Peroxisome biogenesis protein 5
4	202671658	202675792	Zm00001d052855		description=HSP protein%253B Putative heat shock protein 90 family protein
4	202868717	202869526	Zm00001d052864		description=Fasciclin-like arabinogalactan protein 7
4	203191381	203193332	Zm00001d052878
4	203236781	203238037	Zm00001d052881
4	203237227	203240756	Zm00001d052882		description=Putative TCP-1/cpn60 chaperonin family protein
4	203852542	203856158	Zm00001d052893		description=Protein EMSY-LIKE 4
4	204185325	204195660	Zm00001d052902		description=Chaperone protein dnaJ 6
4	204477980	204479339	Zm00001d052910
4	205278205	205280718	Zm00001d052934		description=Auxin-responsive protein [Source:UniProtKB/TrEMBL%3BAcc:A0A1D6QKZ2]
4	206116499	206121004	Zm00001d052953		description=Pumilio homolog 12
4	206347511	206358362	Zm00001d052961		description=Protein ROOT HAIR DEFECTIVE 3 homolog 2
4	206380174	206382649	Zm00001d052962		description=Putative RING zinc finger domain superfamily protein
4	206535429	206538212	Zm00001d052967		description=EPIDERMAL PATTERNING FACTOR-like protein 4
4	207070948	207072073	Zm00001d052979		description=transferases%3Bfolic acid binding
4	207561707	207563124	Zm00001d052985
4	207905668	207929332	Zm00001d052992		description=Disease resistance protein RPM1
4	207999101	208002906	Zm00001d052996		description=Disease resistance protein RPM1
4	208649304	208651866	Zm00001d053004	Name=auxin import carrier2	description=Auxin transporter-like protein 3
4	208792099	208794207	Zm00001d053006		description=C2H2-like zinc finger protein
4	208898899	208906294	Zm00001d053011		description=Putative DUF869 domain containing family protein
4	209127785	209129931	Zm00001d053015		description=Fructose-bisphosphate aldolase
4	210354523	210354873	Zm00001d053042
4	210921163	210924729	Zm00001d053053		description=U11/U12 small nuclear ribonucleoprotein 59 kDa protein
4	211054808	211055547	Zm00001d053055		description=Dirigent protein 23
4	211990615	211995460	Zm00001d053067		description=NAD(P)-binding Rossmann-fold superfamily protein
4	212908487	212917385	Zm00001d053082		description=Receptor-like serine/threonine-protein kinase SD1-6
4	213023215	213025176	Zm00001d053087		description=G-type lectin S-receptor-like serine/threonine-protein kinase SD2-5
4	213273271	213276371	Zm00001d053091		description=Adagio protein 3
4	213303554	213309579	Zm00001d053092
4	214448821	214449765	Zm00001d053117		description=Expressed protein%3B protein
4	214561712	214564106	Zm00001d053120		description=Putative lysM-domain receptor-like protein kinase family protein
4	215474432	215476369	Zm00001d053135		description=D-mannose binding lectin family protein
4	216038534	216040340	Zm00001d053144		description=2-oxoglutarate (2OG) and Fe(II)-dependent oxygenase superfamily protein
4	216159315	216159899	Zm00001d053146		description=pentatricopeptide (PPR) repeat protein
4	216317487	216322672	Zm00001d053151	Name=Homeobox-transcription factor 6	description=Putative POX domain/homeobox DNA-binding domain family protein
4	216943521	216945053	Zm00001d053156		description=O-methyltransferase ZRP4
4	217828727	217832507	Zm00001d053172		description=F-box protein PP2-B10
4	218265429	218267915	Zm00001d053175		description=Cytochrome b-c1 complex subunit 6
4	218338854	218340164	Zm00001d053178		description=Trihelix transcription factor [Source:UniProtKB/TrEMBL%3BAcc:C0PKA0]
4	218560577	218598417	Zm00001d053182		description=Putative serine esterase family protein
4	219687772	219690119	Zm00001d053202		description=cytochrome P450 family 78 subfamily A polypeptide 8
4	219937359	219942038	Zm00001d053207		description=Pentatricopeptide repeat-containing protein
4	220087908	220093065	Zm00001d053208	Name=SHI/STY (SRS)-transcription factor 3	description=SHI
4	220475424	220477483	Zm00001d053215		description=THAUMATIN-LIKE PROTEIN 1
4	220726001	220728839	Zm00001d053221
4	221211009	221213468	Zm00001d053234		description=Protein DETOXIFICATION 33
4	222450297	222458066	Zm00001d053252		description=GDSL esterase/lipase
4	222931270	222948448	Zm00001d053260		description=calcium-dependent lipid-binding family protein
4	223286478	223317315	Zm00001d053268		description=Protein MICRORCHIDIA 7
4	223892837	223896295	Zm00001d053281	Name=nicotianamine aminotransferase1	description= nicotianamine aminotransferase1
4	225026663	225038512	Zm00001d053301		description=NADPH:adrenodoxin oxidoreductase mitochondrial
4	226105246	226107297	Zm00001d053322		description=Putative lectin-like receptor protein kinase family protein
4	226826897	226831036	Zm00001d053342		description=DUF3119 family protein
4	227182919	227183827	Zm00001d053352		description=Late embryogenesis abundant (LEA) hydroxyproline-rich glycoprotein family
4	227754815	227756155	Zm00001d053366		description=Cyclin-dependent kinase B1-1
4	228805498	228806761	Zm00001d053385
4	228811557	228812260	Zm00001d053387
4	228952679	228956244	Zm00001d053391	Name=bHLH-transcription factor 24	description=Transcription factor SPEECHLESS
4	229142099	229143133	Zm00001d053394
4	230626155	230634841	Zm00001d053409		description=UPF0481 protein
4	230820849	230823728	Zm00001d053416		description=Probable inactive dual specificity protein phosphatase-like
4	230824931	230854157	Zm00001d027011
4	231193933	231195575	Zm00001d053432	Name=iron-sulfur protein2	description= iron-sulfur protein2
4	231582689	231584787	Zm00001d053442	Name=bZIP-transcription factor 120	description=Putative bZIP transcription factor superfamily protein
4	232067299	232077638	Zm00001d053450		description=Putative ubiquitin carboxyl-terminal hydrolase superfamily protein
4	232854573	232857488	Zm00001d053518		description=Putative leucine-rich repeat protein kinase family protein
4	232990810	232991886	Zm00001d053522		description=Whole genome shotgun sequence of line PN40024 scaffold_142.assembly12x (Fragment)
4	233099607	233100023	Zm00001d053526		description=Cwf21
4	233252865	233253284	Zm00001d053534		description=Cwf21
4	234357519	234361884	Zm00001d053563
4	234845163	234847523	Zm00001d053569		description=Cytochrome P450 711A1
4	235421742	235423271	Zm00001d053586		description=Putative cytochrome P450 superfamily protein
4	235753192	235761802	Zm00001d027020
4	236219515	236220535	Zm00001d053608
4	236474079	236481803	Zm00001d053612		description=ABC transporter G family member 40
4	237083050	237084813	Zm00001d053625		description=Alba DNA/RNA-binding protein
4	237108971	237110604	Zm00001d053626		description=SPX domain-containing protein 1
4	237406007	237408981	Zm00001d053631
4	237749322	237752017	Zm00001d053634
4	238238007	238241649	Zm00001d053652		description=Peptidyl-prolyl cis-trans isomerase
4	238450073	238455388	Zm00001d053665		description=ZIP-like protein 1
4	238805319	238809230	Zm00001d053675	Name=lipoxygenase10	description= lipoxygenase10
4	238942996	238945802	Zm00001d053682	Name=C3H-transcription factor 338	description=Zinc finger CCCH domain-containing protein 52
4	238977831	238989000	Zm00001d053684		description=Putative citrate synthase family protein
4	239540604	239540843	Zm00001d053699		description=uncharacterized protein [Source:UniProtKB/TrEMBL%3BAcc:B6T5W7]
4	239601161	239602231	Zm00001d053704		description=Putative RING zinc finger domain superfamily protein
4	239617826	239627509	Zm00001d053706		description=ABC transporter B family member 15
4	239849713	239853306	Zm00001d053722		description=Cyclase
4	239880295	239882266	Zm00001d053724
4	239913835	239917002	Zm00001d053726		description=Myosin heavy chain-related protein
4	240031712	240032737	Zm00001d053733		description=Putative O-Glycosyl hydrolase superfamily protein
4	240158918	240164128	Zm00001d053741	Name=autophagy11a	description=Putative autophagy domain family protein
4	240544366	240548417	Zm00001d053757		description=Galactose mutarotase-like superfamily protein
4	240821769	240823832	Zm00001d053772		description=Serine/threonine-protein kinase HT1
4	241441900	241443616	Zm00001d053805		description=Peptidyl-prolyl cis-trans isomerase
4	241457479	241460882	Zm00001d053808		description=Protein JASON
4	241615198	241618538	Zm00001d053816		description=Thiosulfate/3-mercaptopyruvate sulfurtransferase 1 mitochondrial
4	241806773	241807078	Zm00001d053824
4	242157651	242157947	Zm00001d053843		description=Wound induced protein
4	242208559	242212798	Zm00001d053852		description=Regulator of Vps4 activity in the MVB pathway protein
4	242390665	242395306	Zm00001d053858		description=EH domain-containing protein 1
4	242396086	242396676	Zm00001d053859	Name=AP2-EREBP-transcription factor 98	description=Ethylene-responsive transcription factor 3%253B Putative AP2/EREBP transcription factor superfamily protein
4	242400871	242404592	Zm00001d053860		description=MEI2 C-terminal RRM only like 1
4	242568084	242571603	Zm00001d053867		description=Tyrosine-sulfated glycopeptide receptor 1
4	242572673	242573902	Zm00001d053868		description=Nucleus-encoded chloroplast protein%2C Chloroplast development%2C Biogenesis of chloroplast ATP synthas [Source: Projected from Oryza sativa (Os02g0152900)]
4	242757325	242760957	Zm00001d053878		description=PIN domain-like family protein
4	242962955	242966398	Zm00001d053885
4	242972197	242981389	Zm00001d053886		description=L-arabinokinase
4	243042533	243050543	Zm00001d053889	Name=cycloartenol synthase1	description= cycloartenol synthase1
4	243050411	243053629	Zm00001d053890	Name=SBP-transcription factor 20	description=Squamosa promoter-binding-like protein 2
4	243143280	243151346	Zm00001d053891		description=ILITYHIA
4	243335691	243336832	Zm00001d053897		description=Ubiquitin-conjugating enzyme E2 29
4	243382173	243392450	Zm00001d053906		description=transcription regulators
4	243518692	243520549	Zm00001d053910
4	243523053	243529919	Zm00001d053911
4	243692664	243693167	Zm00001d053926		description=EF-hand Ca2+-binding protein CCD1
4	243904766	243907378	Zm00001d053941		description=3-isopropylmalate dehydratase large subunit
4	244414417	244418397	Zm00001d053967	Name=bZIP-transcription factor 71	description=Putative bZIP transcription factor superfamily protein
4	244691517	244692145	Zm00001d053988	Name=bZIP-transcription factor 84	description=Ocs element-binding factor 1%253B Putative bZIP transcription factor superfamily protein
4	244778206	244778835	Zm00001d053991
4	245105914	245109405	Zm00001d054012		description=Putative leucine-rich repeat receptor-like protein kinase family protein
4	245347415	245348407	Zm00001d054033		description=DNA-directed RNA polymerases IV and V subunit 4
5	2204320	2225211	Zm00001d012935		description=Nucleobase-ascorbate transporter 6
5	2228453	2229426	Zm00001d012937		description=Thioesterase superfamily protein
5	2237403	2238414	Zm00001d012939		description=Bowman-Birk type trypsin inhibitor
5	2395497	2399273	Zm00001d012962		description=Probable protein phosphatase 2C 4
5	2554674	2558207	Zm00001d012970		description=Phosphatidylinositol N-acetyglucosaminlytransferase subunit P-related
5	2582304	2584012	Zm00001d012972	Name=chalcone flavanone isomerase3	description= chalcone flavanone isomerase3
5	2663422	2665225	Zm00001d012978		description=40S ribosomal protein S23-2
5	2666357	2681120	Zm00001d012979	Name=Alfin-like-transcription factor 17	description=Pentatricopeptide repeat-containing protein mitochondrial
5	2879546	2882574	Zm00001d012994		description=Histidine kinase CKI1
5	2977575	2979101	Zm00001d013003	Name=NAC-transcription factor 60	description=NAC domain-containing protein 2
5	3197352	3202002	Zm00001d013012		description=HIT zinc finger %3BPAPA-1-like conserved region
5	3486306	3487932	Zm00001d013031
5	3492135	3493834	Zm00001d013033		description=Chaperonin-like RbcX protein
5	3494823	3496592	Zm00001d013034		description=40S ribosomal protein S2-1
5	3537738	3542307	Zm00001d013035		description=Cycloartenol-C-24-methyltransferase
5	3579930	3583194	Zm00001d013037		description=Cycloartenol-C-24-methyltransferase 1
5	3586891	3587917	Zm00001d013038		description=Cupredoxin superfamily protein
5	3891202	3893064	Zm00001d013053		description=Probable prolyl 4-hydroxylase 12
5	3900060	3902473	Zm00001d013055		description=Vesicle-associated membrane protein 722
5	3946993	3950428	Zm00001d013057		description=Actin cross-linking protein
5	4123406	4128589	Zm00001d013065		description=Protein WVD2-like 3
5	4432208	4433838	Zm00001d013080		description=Leucine-rich repeat extensin-like protein 6
5	4710703	4714196	Zm00001d013101
5	4796152	4799203	Zm00001d013111		description=DnaJ protein
5	4876757	4878827	Zm00001d013113		description=Expp1 protein
5	5048884	5049726	Zm00001d013118		description=Drought and salt tolerance protein%3B Expressed protein
5	5078404	5079549	Zm00001d013119	Name=TCP-transcription factor 44	description=Transcription factor TCP2
5	5151482	5154146	Zm00001d013125
5	5155184	5157905	Zm00001d013126		description= protein%3B Tyrosine specific protein phosphatase-like
5	5181668	5187630	Zm00001d013127		description=Zinc transporter ZTP29
5	5189195	5192215	Zm00001d013128		description=AP-1 complex subunit sigma-2
5	5325997	5328420	Zm00001d013135		description=Ribose-5-phosphate isomerase
5	5332065	5334626	Zm00001d013136	Name=defective kernel36	description=Pentatricopeptide repeat-containing protein
5	5620258	5624485	Zm00001d013162		description=Leucine-rich repeat receptor-like serine/threonine-protein kinase BAM3
5	5804406	5808177	Zm00001d013170		description=AP2 domain-containing transcription factor
5	5822165	5823286	Zm00001d013173		description=Protein PHLOEM PROTEIN 2-LIKE A10
5	5935831	5936304	Zm00001d013175
5	5981955	5982515	Zm00001d013178
5	6107064	6112875	Zm00001d013187		description=Probable transcription factor KAN4
5	6146998	6150936	Zm00001d013188		description=seven transmembrane domain protein
5	6160424	6160777	Zm00001d013191		description=Cytochrome b6-f complex subunit 7
5	6337532	6344646	Zm00001d013199		description=Probable beta-14-xylosyltransferase IRX10L
5	6587631	6588425	Zm00001d013208		description=Zinc finger protein AZF2
5	6604879	6605949	Zm00001d013210
5	6614734	6624150	Zm00001d013211
5	6652580	6655595	Zm00001d013218		description=Chaperone DnaJ-domain superfamily protein
5	6711124	6713605	Zm00001d013220		description=Probable protein phosphatase 2C 48
5	6715039	6717199	Zm00001d013221		description=SWIb domain-containing protein
5	6718595	6719557	Zm00001d013222	Name=GRMZM2G077034	description=Gibberellin-regulated protein 10
5	6756099	6759253	Zm00001d013225		description=TIP41-like family protein
5	6770365	6773482	Zm00001d013228		description=TIP41-like family protein
5	6839140	6839745	Zm00001d013234		description=2-hydroxyacyl-CoA lyase
5	7187559	7188963	Zm00001d013257		description=Cytochrome b5
5	7193149	7199073	Zm00001d013258	Name=Zea mays MADS31	description= Zea mays MADS31
5	7240613	7258833	Zm00001d013259	Name=Zea mays MADS-box 15	description= Zea mays MADS-box 15
5	7387191	7388959	Zm00001d013263		description=Expressed protein%3B protein
5	7615288	7624824	Zm00001d013276		description=Myosin-12
5	7898532	7900299	Zm00001d013287
5	7976659	7989206	Zm00001d013294
5	8064917	8072039	Zm00001d013301		description=Sec23/Sec24 protein transport family protein
5	8294262	8298162	Zm00001d013310		description=Deoxyhypusine synthase
5	8316408	8316890	Zm00001d013311
5	8343621	8344214	Zm00001d013312		description=Universal stress protein PHOS34
5	8617116	8620509	Zm00001d013319		description=Endoglucanase 25
5	8693104	8693826	Zm00001d013326
5	8803187	8808065	Zm00001d013331	Name=ZIM-transcription factor 2	description=GATA transcription factor 25
5	8883525	8890357	Zm00001d013338		description=Ethylene response sensor 1
5	8899703	8902903	Zm00001d013339		description=Expressed protein%3B protein
5	8969676	8972493	Zm00001d013343		description=ACT domain-containing protein ACR1
5	9051468	9063110	Zm00001d013346	Name=GRF-transcription factor 14	description=Growth-regulating factor 2
5	9966075	9968201	Zm00001d013369
5	10004194	10008482	Zm00001d013376		description=Probable LRR receptor-like serine/threonine-protein kinase
5	10472063	10479079	Zm00001d013402	Name=phytochromeA2	description= phytochromeA2
5	10497408	10501324	Zm00001d013406		description=alpha/beta-Hydrolases superfamily protein
5	10540717	10541439	Zm00001d013409	Name=ZF-HD-transcription factor 4	description=ZF-HD protein dimerisation region containing protein
5	11126389	11127711	Zm00001d013425		description=Tsr2248 protein
5	11750201	11752331	Zm00001d013445
5	11833203	11834064	Zm00001d013448		description=Chemocyanin
5	12055276	12056486	Zm00001d013455		description=Peptidyl-prolyl cis-trans isomerase
5	12114820	12127510	Zm00001d013463		description=Outer envelope protein 64 chloroplastic
5	12655174	12657306	Zm00001d013488		description=Pentatricopeptide repeat protein PPR868-14
5	12657966	12661040	Zm00001d013489		description=splicing factor Prp18 family protein
5	12718250	12718810	Zm00001d013494	Name=oleosin3	description=Oleosin Zm-II
5	13027719	13028456	Zm00001d013509		description=Ribosomal protein S21 family protein
5	13440457	13446073	Zm00001d013519		description=Protein UPSTREAM OF FLC
5	13535766	13538931	Zm00001d013522		description=14-dihydroxy-2-naphthoyl-CoA thioesterase 1
5	13630314	13633461	Zm00001d013527		description=Calcium-dependent protein kinase 30
5	13659653	13664953	Zm00001d013529		description=Protein NRT1/ PTR FAMILY 2.9
5	13856319	13859702	Zm00001d013536		description=HPP
5	14083976	14086049	Zm00001d013549		description=RING/U-box superfamily protein
5	14164536	14166487	Zm00001d013554
5	14451040	14451980	Zm00001d013568	Name=responsive to abscisic acid15	description=Glycine-rich RNA-binding%252C abscisic acid-inducible protein
5	14483284	14513180	Zm00001d013572		description=Cysteine-rich receptor-like protein kinase 10
5	14538181	14540740	Zm00001d013573		description=Glucan endo-13-beta-glucosidase 7
5	14622721	14625111	Zm00001d013577
5	14944805	14946459	Zm00001d013588		description=hydroxyproline-rich glycoprotein family protein
5	15032177	15038838	Zm00001d013592
5	15094771	15095668	Zm00001d013596	Name=GNAT-transcription factor 22	description=Acyl-CoA N-acyltransferases (NAT) superfamily protein
5	15095907	15104883	Zm00001d013597		description=Protein CDC73 homolog
5	15104859	15105955	Zm00001d013598		description=Lipid binding protein [Source:UniProtKB/TrEMBL%3BAcc:B4G0Q2]
5	15246135	15252316	Zm00001d013606
5	15311811	15319813	Zm00001d013609
5	15493285	15495021	Zm00001d013615		description=Expressed protein%3B protein
5	15623823	15627865	Zm00001d013618		description=Phospho-2-dehydro-3-deoxyheptonate aldolase 2 chloroplastic
5	15984477	15986207	Zm00001d013638		description=Cation/calcium exchanger 2
5	16103881	16104775	Zm00001d013643
5	16124142	16125803	Zm00001d013646		description=Ankyrin repeat family protein
5	16205069	16210643	Zm00001d013651		description=Chlorophyll(ide) b reductase NOL chloroplastic
5	16248550	16257893	Zm00001d013652		description=Cationic amino acid transporter 4 vacuolar
5	16642355	16642990	Zm00001d013660
5	16899731	16900783	Zm00001d013668		description=Electron transporter/ thiol-disulfide exchange intermediate
5	17050121	17054266	Zm00001d013676	Name=CCAAT-HAP2-transcription factor 210	description=Nuclear transcription factor Y subunit A-10
5	17942846	17948363	Zm00001d013702		description= nucleosome/chromatin assembly factor C
5	18047108	18052512	Zm00001d013703		description=Serine/threonine-protein kinase Nek1
5	18196300	18197763	Zm00001d013707	Name=Aux/IAA-transcription factor 22	description=Auxin-responsive protein IAA4
5	18274806	18283480	Zm00001d013713		description=Nucleotide-binding protein-like
5	18631981	18633840	Zm00001d013725	Name=gibberellin 20-oxidase4	description= gibberellin 20-oxidase4
5	18918646	18921698	Zm00001d013736	Name=SnRK2 serine threonine kinase10	description=Serine/threonine-protein kinase SRK2E
5	19094397	19096516	Zm00001d013744		description=Putative cyclin-A3-1
5	19178319	19179668	Zm00001d013747		description=Presenilin
5	19607076	19608662	Zm00001d013759		description=Cytochrome P450 71D7
5	20161442	20163432	Zm00001d013786		description=transferases%3Bfolic acid binding
5	20366226	20367341	Zm00001d013794
5	21182817	21186548	Zm00001d013810	Name=multidrug and toxic compound extrusion2	description= multidrug and toxic compound extrusion2
5	21432540	21439074	Zm00001d013821
5	21493210	21493920	Zm00001d013825
5	22386060	22387928	Zm00001d013844		description=Methionine gamma-lyase
5	22766950	22769790	Zm00001d013855	Name=ZIM-transcription factor 7	description=Protein SRC2 homolog
5	22863385	22865079	Zm00001d013858		description=Probable receptor-like protein kinase
5	23136709	23154188	Zm00001d013860		description=SH3 domain-containing protein 2
5	23554267	23554626	Zm00001d013875
5	24019244	24026165	Zm00001d013894		description=transducin family protein / WD-40 repeat family protein
5	24363516	24369169	Zm00001d013906		description=Protein TRANSPARENT TESTA 12
5	25431430	25434346	Zm00001d013937	Name=GRMZM2G073351	description=Protochlorophyllide reductase C chloroplastic
5	25546118	25546714	Zm00001d013945		description=Ripening-related protein 3
5	25632561	25633358	Zm00001d013947		description=NHL25
5	26015245	26022791	Zm00001d013951		description=Tetratricopeptide repeat (TPR)-like superfamily protein
5	26132024	26133292	Zm00001d013956	Name=tonoplast intrinsic protein3	description= tonoplast intrinsic protein3
5	26237325	26241411	Zm00001d013958
5	27225663	27235776	Zm00001d013982
5	27692922	27694559	Zm00001d013991		description=Type III polyketide synthase A
5	27756853	27760173	Zm00001d013992		description=Pyridoxal phosphate (PLP)-dependent transferases superfamily protein
5	28799932	28802306	Zm00001d014016		description=Cytokinin riboside 5'-monophosphate phosphoribohydrolase LOG3
5	29347456	29349180	Zm00001d014029		description=myb domain protein 15
5	29707848	29708480	Zm00001d014032		description=Protein LIGHT-DEPENDENT SHORT HYPOCOTYLS 3
5	31079371	31083342	Zm00001d014060		description=Protein NRT1/ PTR FAMILY 5.2
5	31173095	31176859	Zm00001d014063		description=MDIS1-interacting receptor like kinase 2
5	31562804	31566178	Zm00001d014073		description=60S ribosomal protein L23
5	31977227	31978440	Zm00001d014089		description=Adenine nucleotide alpha hydrolases-like superfamily protein
5	32989044	32994466	Zm00001d014114
5	33004668	33006371	Zm00001d014116	Name=phosphate transporter protein1	description= phosphate transporter protein1
5	36895381	36897327	Zm00001d014222		description=Pentatricopeptide repeat-containing protein mitochondrial
5	44141573	44143424	Zm00001d014386		description=Patatin-like protein 6
5	44296768	44296888	zma-MIR160b
5	82695650	82696633	Zm00001d015284
5	82970088	82974239	Zm00001d015292		description=Endoglucanase 11
5	82992330	82999777	Zm00001d015293		description=VIN3-like protein 2
5	83323891	83326591	Zm00001d015300		description=60S ribosomal protein L19
5	83963205	83964677	Zm00001d015307		description=Protein IRX15-LIKE
5	83966625	83970693	Zm00001d015308
5	84027989	84029861	Zm00001d015310		description=Cystathionine beta-synthase (CBS) family protein
5	84701726	84710089	Zm00001d015328		description=Pectin lyase-like superfamily protein
5	85073941	85074776	Zm00001d015335
5	85137958	85138457	Zm00001d015339
5	85459453	85460196	Zm00001d015342		description=Protein LIGHT-DEPENDENT SHORT HYPOCOTYLS 5
5	86080662	86081459	Zm00001d015355		description=Urease accessory protein F
5	86733894	86746224	Zm00001d015372		description=CONTAINS InterPro DOMAIN/s: Ribonuclease H2 subunit C (InterPro:IPR013924)%3B Has 30201 Blast hits to 17322 proteins in 780 species: Archae - 12%3B Bacteria - 1396%3B Metazoa - 17338%3B Fungi - 3422%3B Plants - 5037%3B Viruses - 0%3B Other Eukaryotes - 2996 (sou /.../CBI BLink).
5	87067786	87070960	Zm00001d015377		description=Pentatricopeptide repeat-containing protein
5	87500416	87500745	Zm00001d015382
5	87654865	87656030	Zm00001d015385		description=Chlorophyll a-b binding protein 6 chloroplastic
5	88372291	88376274	Zm00001d015399		description=Choline-phosphate cytidylyltransferase 2
5	88443306	88448870	Zm00001d015400		description=S-adenosyl-L-methionine-dependent methyltransferases superfamily protein
5	89796563	89800151	Zm00001d015433		description=CONTAINS InterPro DOMAIN/s: Mitotic checkpoint protein PRCC C-terminal (InterPro:IPR018800)%3B Has 930 Blast hits to 533 proteins in 146 species: Archae - 0%3B Bacteria - 18%3B Metazoa - 327%3B Fungi - 143%3B Plants - 61%3B Viruses - 0%3B Other Eukaryotes - 381 /.../e: NCBI BLink).
5	89924027	89924707	Zm00001d015434		description=B-box zinc finger family protein
5	90487714	90495272	Zm00001d015444		description=Gamma-aminobutyrate transaminase POP2 mitochondrial
5	90494901	90498102	Zm00001d015445		description=Gamma-aminobutyrate transaminase POP2 mitochondrial
5	90859128	90860638	Zm00001d015448		description=OSJNBa0041A02.21 protein%3B protein
5	91459227	91463857	Zm00001d015459	Name=coumarate ligase1	description=4-coumarate--CoA ligase 1
5	91662570	91670033	Zm00001d015462		description=CDPK-related kinase 3
5	91982760	91983347	Zm00001d015470		description=GDU1
5	92333359	92333901	Zm00001d015475		description=RING-H2 finger protein ATL2L
5	92811181	92811926	Zm00001d015481		description=40S ribosomal protein S4-3
5	92848176	92848523	Zm00001d015482
5	93775604	93780255	Zm00001d015497		description=Aconitate hydratase 3 mitochondrial
5	94160702	94167041	Zm00001d015504		description=Protein phosphatase 2C isoform gamma
5	95183890	95185688	Zm00001d015515	Name=WRKY-transcription factor 48	description=Probable WRKY transcription factor 40
5	95546146	95556835	Zm00001d015519		description=RNA-binding (RRM/RBD/RNP motifs) family protein
5	95614609	95620842	Zm00001d015520		description=Chaperone protein ClpB4 mitochondrial
5	99075510	99077695	Zm00001d015579
5	100769867	100773584	Zm00001d015605	Name=Trihelix-transcription factor 13	description=Putative metallo-beta-lactamase homeodomain-containing protein
5	101918442	101919917	Zm00001d015623		description=Limonoid UDP-glucosyltransferase
5	102015204	102017402	Zm00001d015628		description=Ribosome-like protein
5	102221922	102239302	Zm00001d015634
5	102453379	102459358	Zm00001d015637		description=GDSL esterase/lipase
5	102525749	102528497	Zm00001d015638
5	107587846	107588194	Zm00001d015686
5	108281229	108299082	Zm00001d015693		description=AUGMIN subunit 6
5	108882599	108887800	Zm00001d015702		description=Putative chloride channel-like protein CLC-g
5	110417344	110434110	Zm00001d015714		description=Guanylate-binding family protein
5	112707895	112710811	Zm00001d015721		description=Cytochrome P450 734A1
5	113153688	113156112	Zm00001d015723
5	113204814	113207150	Zm00001d015724		description=(6-4)DNA photolyase
5	114127797	114128849	Zm00001d015730		description=uncharacterized protein [Source:UniProtKB/TrEMBL%3BAcc:B6UGW2]
5	115418527	115418937	Zm00001d015742
5	115568661	115571006	Zm00001d015744		description=Ring canal kelch
5	115882990	115889703	Zm00001d015747		description=Protein disulfide-isomerase like 2-1
5	118084092	118085317	Zm00001d015767
5	118463714	118464650	Zm00001d015777		description=Chloroplast small heat shock protein
5	123354228	123355478	Zm00001d015815	Name=GRAS-transcription factor 17	description=Scarecrow-like protein 18
5	126864198	126867730	Zm00001d015857		description=40S ribosomal protein S4-3
5	127123911	127125492	Zm00001d015865
5	127454319	127459503	Zm00001d015870		description=Acetamidase/Formamidase family protein
5	127616516	127638066	Zm00001d015876
5	127778392	127778829	Zm00001d015877
5	130027454	130030346	Zm00001d015905	Name=sugars will eventually be exported transporter4a	description= sugars will eventually be exported transporter4a
5	131162542	131163113	Zm00001d015917		description=Nucleic acid-binding OB-fold-like protein
5	131469616	131471554	Zm00001d015921		description=Plasma membrane-associated cation-binding protein 1
5	131794319	131803160	Zm00001d015927		description=L-gulonolactone oxidase 3
5	132637131	132639444	Zm00001d015934		description=Pectinesterase-2
5	137788352	137823207	Zm00001d015992
5	138120817	138128265	Zm00001d015997		description=Similar to Rf2 protein [Source: Projected from Oryza sativa (Os02g0274000)]
5	138743751	138746834	Zm00001d016001		description=Rop guanine nucleotide exchange factor 9
5	139147655	139156020	Zm00001d016008		description=VHS and GAT domain protein
5	140889217	140917197	Zm00001d016037		description=Adenine nucleotide alpha hydrolases-like superfamily protein
5	141438801	141445420	Zm00001d016045		description=Isoamylase 1 chloroplastic
5	141693514	141695426	Zm00001d016052	Name=WRKY-transcription factor 2	description=WRKY transcription factor 22
5	141987593	141990287	Zm00001d016059
5	142163992	142164885	Zm00001d016062		description=Late embryogenesis abundant (LEA) hydroxyproline-rich glycoprotein family
5	142715769	142723741	Zm00001d016070	Name=phosphate regulatory homolog1	description= phosphate regulatory homolog1
5	144132627	144133823	Zm00001d016091		description=UDP-glycosyltransferase 73D1
5	144342410	144347442	Zm00001d016095	Name=bHLH-transcription factor 139	description=Transcription factor SPEECHLESS
5	144501076	144502820	Zm00001d016098
5	144538823	144547116	Zm00001d016100		description=Rhodanese-like domain-containing protein 4 chloroplastic
5	146055871	146056197	Zm00001d016135
5	147526533	147553591	Zm00001d016156		description=Putative callose synthase 8
5	147708234	147712414	Zm00001d016160	Name=potassium channel7	description=Potassium channel KAT1
5	147968132	147970115	Zm00001d016163
5	147975445	147981136	Zm00001d016164		description=GW2
5	148251598	148253961	Zm00001d016167
5	148414842	148415510	Zm00001d016172		description=DNA helicase
5	148955813	148957970	Zm00001d016185		description=Peroxidase 52
5	149830371	149856132	Zm00001d016193		description=Coatomer subunit beta'-3
5	149925867	149926358	Zm00001d016194		description=Cysteine-rich receptor-like protein kinase 36
5	150300976	150305724	Zm00001d016198	Name=glutamate-oxaloacetic transaminase3	description= glutamate-oxaloacetic transaminase3
5	150432936	150435131	Zm00001d016207		description=Actin-related protein 2/3 complex subunit 3
5	151919209	151921778	Zm00001d016238
5	153026870	153027333	Zm00001d001662
5	155133354	155138211	Zm00001d016274		description=Monosaccharide-sensing protein 2
5	155336754	155338487	Zm00001d016276	Name=ribosomal protein S24	description= ribosomal protein S24
5	155417891	155421796	Zm00001d016277	Name=Aux/IAA-transcription factor 23	description=Auxin-responsive protein IAA26
5	155592092	155595494	Zm00001d016285		description=Protein kinase family protein with leucine-rich repeat domain
5	156109006	156112456	Zm00001d016298	Name=Homeobox-transcription factor 2	description=Homeobox protein ATH1
5	156137453	156146644	Zm00001d016299	Name=mitochondrial carrier family protein1	description= mitochondrial carrier family protein1
5	156275281	156276773	Zm00001d016301		description=Inorganic pyrophosphatase 1
5	157111017	157120204	Zm00001d016322
5	157659574	157662571	Zm00001d016331		description=Inactive LRR receptor-like serine/threonine-protein kinase BIR2
5	163059296	163070333	Zm00001d016459		description=Serine carboxypeptidase-like 19
5	163090196	163091701	Zm00001d016460		description=Serine carboxypeptidase-like 19
5	164997608	164999227	Zm00001d016500		description=lipase class 3 family protein
5	171157876	171158745	Zm00001d016647		description=Inositol hexaphosphate kinase
5	171545327	171545746	Zm00001d016655
5	171913028	171914209	Zm00001d016666		description=Ubiquitin carboxyl-terminal hydrolase family protein
5	172180319	172183764	Zm00001d016674	Name=HSF-transcription factor 6	description=Heat shock factor protein 2
5	172379178	172386407	Zm00001d016679
5	172408085	172409854	Zm00001d016682		description=RING-H2 finger protein ATL7
5	172643939	172645561	Zm00001d016691		description=Copper transport protein CCH
5	172814186	172820085	Zm00001d016694		description=Poly [ADP-ribose] polymerase 3
5	172823151	172832241	Zm00001d016695		description=Probable sodium/metabolite cotransporter BASS4 chloroplastic
5	173403817	173408283	Zm00001d016708	Name=cell wall invertase1	description=Beta-fructofuranosidase%252C cell wall isozyme
5	174365786	174367714	Zm00001d016727		description=Vacuole membrane protein KMS1
5	174367811	174372540	Zm00001d016728		description=argonaute 1A-like protein
5	174537324	174537890	Zm00001d016733		description=NDR1/HIN1-like 1
5	174689200	174692440	Zm00001d016735		description=Protein SMAX1-LIKE 3
5	174747158	174747697	Zm00001d016741		description=Pectinesterase inhibitor domain containing protein
5	174862785	174863648	Zm00001d016748		description=Protein MKS1
5	175026874	175027977	Zm00001d016756		description=NF-180
5	175226979	175228235	Zm00001d016764		description=Ubiquitin-protein ligase
5	175250082	175253741	Zm00001d016765		description=Protein kinase superfamily protein
5	175971548	175973918	Zm00001d016787		description=SLL1 protein
5	176195689	176197245	Zm00001d016799
5	177141675	177142339	Zm00001d016818		description=NADH dehydrogenase [ubiquinone] iron-sulfur protein 6 mitochondrial
5	177286413	177287057	Zm00001d016823
5	177539021	177540697	Zm00001d016826		description=proline-rich family protein
5	177557935	177560415	Zm00001d016828		description=Pentatricopeptide repeat-containing protein
5	178210000	178212184	Zm00001d016842		description=monooxygenase 1
5	178232995	178234870	Zm00001d016844		description=monooxygenase 1
5	178309072	178312433	Zm00001d016851
5	178381711	178383803	Zm00001d016853		description=APO protein 3 mitochondrial
5	179287635	179291743	Zm00001d016884		description=F11F12.5 protein
5	179320080	179324188	Zm00001d016885		description=F11F12.5 protein
5	179479278	179480567	Zm00001d016893		description=Thioredoxin-like 2
5	179608070	179609074	Zm00001d016895		description=Gibberellin receptor GID1L2
5	179623715	179628079	Zm00001d016898		description=Transposon protein Mutator sub-class
5	180060378	180064086	Zm00001d016920		description=10A19I.15
5	180363906	180366525	Zm00001d016933		description=loricrin-related
5	180382947	180384955	Zm00001d016934		description=Galactose mutarotase-like superfamily protein
5	180472917	180476181	Zm00001d016938	Name=sucrose transporter5	description= sucrose transporter GRMZM2G081589
5	180911410	180911748	Zm00001d016947
5	180917051	180917386	Zm00001d016948
5	180935612	180939540	Zm00001d016949		description=YGL010w
5	181022647	181024609	Zm00001d016952	Name=MYB-transcription factor 126	description=DNA binding protein
5	181491931	181500031	Zm00001d016963		description=Bifunctional riboflavin biosynthesis protein RIBA 1 chloroplastic
5	181546860	181560813	Zm00001d016969		description=E3 ubiquitin-protein ligase RHF1A
5	182159462	182159776	Zm00001d016991
5	182432190	182432762	Zm00001d017002
5	183341194	183342813	Zm00001d017037		description=PTB domain-containing engulfment adapter protein 1 isoform 1
5	184300283	184307663	Zm00001d017066		description=Triacylglycerol lipase SDP1
5	184324784	184338621	Zm00001d017068
5	184385751	184388156	Zm00001d017071		description=Plant intracellular Ras-group-related LRR protein 3
5	184494219	184496209	Zm00001d017077	Name=red aleurone1	description= red aleurone1
5	184659751	184662560	Zm00001d017079		description=BTB/POZ domain-containing protein
5	189459702	189460050	Zm00001d001703
5	190328893	190330485	Zm00001d017250		description=Pentatricopeptide repeat-containing protein
5	195860307	195862004	Zm00001d017434		description=14-3-3-like protein GF14 nu
5	195906689	195909170	Zm00001d017441		description=Cyclin-U4-2
5	196995199	196997750	Zm00001d017473		description=Protein kinase superfamily protein
5	203227844	203228980	Zm00001d017653		description=E3 ubiquitin-protein ligase ATL4
5	203485525	203489990	Zm00001d017666		description=Protein NRT1/ PTR FAMILY 7.2
5	204090824	204092041	Zm00001d017678		description=Putative RING-H2 finger protein ATL53
5	204120837	204122561	Zm00001d017682	Name=PLATZ-transcription factor 11	description=PLATZ transcription factor family protein
5	204191566	204196931	Zm00001d017685		description=Chaperone DnaJ-domain superfamily protein
5	204298151	204308212	Zm00001d017686		description=Ubiquitin carboxyl-terminal hydrolase 20
5	204300460	204303088	Zm00001d017687		description=Retrovirus-related Pol polyprotein LINE-1
5	204484844	204485122	Zm00001d017697
5	204630766	204635304	Zm00001d017702	Name=G2-like-transcription factor 47	description=Probable transcription factor KAN2
5	204683247	204687276	Zm00001d017703		description=survival motor neuron protein
5	204700264	204702470	Zm00001d017706		description=Pentatricopeptide repeat-containing protein
5	204804612	204808574	Zm00001d017709		description=Secretory carrier-associated membrane protein 4
5	204910256	204912526	Zm00001d017711		description=Phosphoribulokinase
5	204965594	204969901	Zm00001d017712	Name=WRKY-transcription factor 46	description=Probable WRKY transcription factor 14
5	205105870	205106370	Zm00001d017719		description=60S ribosomal protein L12-3
5	205181529	205188957	Zm00001d017720		description=DNA topoisomerase 2
5	205371599	205377633	Zm00001d017728		description=Polyamine transporter RMV1
5	205825586	205829216	Zm00001d017746	Name=vitamin E synthesis4	description= vitamin E synthesis4
5	206249302	206254075	Zm00001d017768
5	206414473	206416485	Zm00001d017778	Name=bHLH-transcription factor 29	description=Transcription factor bHLH63
5	206597153	206597443	Zm00001d017782	Name=MYB-related-transcription factor 78	description=SANT/MYB protein
5	207066204	207098182	Zm00001d017798		description=Histone-lysine N-methyltransferase SUVR5
5	207115775	207118184	Zm00001d017799		description=Exonuclease family protein
5	207375638	207378185	Zm00001d017807
5	207626509	207626934	Zm00001d017817
5	207733647	207736615	Zm00001d017820		description=Galactan beta-14-galactosyltransferase GALS1
5	207839207	207840181	Zm00001d017825		description=AT-hook motif nuclear-localized protein 29
5	207860764	207865964	Zm00001d017826		description=3-hydroxy-3-methylglutaryl-coenzyme A reductase 2
5	208057546	208063084	Zm00001d017831	Name=ARID-transcription factor 5	description=AT-rich interactive domain-containing protein 3
5	208461206	208462369	Zm00001d017840		description=Delta(12)-fatty-acid desaturase
5	208581631	208582399	Zm00001d017843
5	208836902	208837258	Zm00001d017851
5	209075772	209076365	Zm00001d017861		description=Protein binding protein
5	209132505	209139911	Zm00001d017866		description=Aspartyl protease AED1
5	209143391	209145843	Zm00001d017867		description=Aspartyl protease AED1
5	209468909	209472256	Zm00001d017878		description=Putative pentatricopeptide repeat-containing protein mitochondrial
5	209614260	209620254	Zm00001d017885	Name=C2C2-CO-like-transcription factor 5	description=Zinc finger protein CONSTANS-LIKE 9
5	209622400	209626936	Zm00001d017886		description=Nucleotide/sugar transporter family protein
5	209719922	209722622	Zm00001d017897		description=At5g47680 [Source:Projected from Arabidopsis thaliana (AT5G47680) UniProtKB/TrEMBL%3BAcc:Q9FGI9]
5	209782489	209783391	Zm00001d017900	Name=C2C2-Dof-transcription factor 42	description=Dof zinc finger protein DOF5.4
5	209973548	209974192	Zm00001d017907		description=Protein TIC 20-v chloroplastic
5	210036826	210039426	Zm00001d017912		description=LAG1 longevity assurance homolog 3
5	210045106	210049644	Zm00001d017913		description=Protein NSP-INTERACTING KINASE 1
5	210273759	210285475	Zm00001d017932	Name=MADS-transcription factor 26	description=Agamous-like MADS-box protein AGL16
5	210407150	210409118	Zm00001d017939	Name=2C2-CO-like-transcription factor 12	description=Zinc finger protein CONSTANS-LIKE 7
5	210807462	210811487	Zm00001d017954		description=Disease resistance protein RPM1
5	210812448	210813281	Zm00001d017955		description=Cysteine-rich repeat secretory protein 15
5	210867625	210871221	Zm00001d017958	Name=glutamine synthetase4	description=Glutamine synthetase root isozyme 3
5	210947384	210954891	Zm00001d017962		description=RNA-dependent RNA polymerase 1
5	211152775	211154133	Zm00001d017976		description=Immediate-early fungal elicitor protein CMPG1
5	211658453	211660266	Zm00001d017998
5	211724809	211725519	Zm00001d018002
5	211742129	211742884	Zm00001d018003
5	211895819	211898527	Zm00001d018006		description=Serine/threonine-protein kinase WNK (With No Lysine)-related
5	212254262	212257744	Zm00001d018024	Name=PIN-formed protein2	description= PIN-formed protein2
5	212372579	212374838	Zm00001d018028		description=NEP1-interacting protein-like 2
5	212391759	212393282	Zm00001d018030		description=Photosynthetic NDH subunit of subcomplex B 4 chloroplastic
5	212488580	212492036	Zm00001d018032		description=Probable mannan synthase 7
5	212543656	212546035	Zm00001d018034	Name=geranylgeranyl hydrogenase1	description= geranylgeranyl hydrogenase1
5	212630308	212636028	Zm00001d018038	Name=NAC-transcription factor 59	description=Putative NAC domain-containing protein 94
5	212712300	212716910	Zm00001d018042		description=Whole genome shotgun sequence of line PN40024 scaffold_26.assembly12x (Fragment)
5	212792080	212793282	Zm00001d018045	Name=TCP-transcription factor 26	description=Transcription factor TCP14
5	213760677	213761423	Zm00001d018069	Name=ATP synthase chloroplast subunit1	description= ATP synthase chloroplast subunit1
5	213815299	213816720	Zm00001d018075		description=Copper ion binding protein
5	213839290	213843472	Zm00001d018080		description=Probable beta-D-xylosidase 7
5	213976676	213977392	Zm00001d018086
5	214041553	214042179	Zm00001d018089		description=VQ motif family protein
5	214119645	214121623	Zm00001d018096		description=50S ribosomal protein L29
5	214355541	214357266	Zm00001d018104		description=EPIDERMAL PATTERNING FACTOR-like protein 1
5	214437864	214442320	Zm00001d018106		description=Protein EXORDIUM
5	214720422	214721681	Zm00001d018122		description=E3 ubiquitin-protein ligase ATL6
5	214753216	214754871	Zm00001d018125		description=ATP binding protein
5	214791877	214793710	Zm00001d018127		description=SNW/SKI-interacting protein
5	214945228	214948102	Zm00001d018131		description=Chaperone protein dnaJ
5	215255604	215260516	Zm00001d018140		description=Sialyltransferase-like protein 1
5	215559914	215560543	Zm00001d018150
5	215689465	215692994	Zm00001d018156		description=Galactoside 2-alpha-L-fucosyltransferase
5	215716411	215717121	Zm00001d018158	Name=AP2-EREBP-transcription factor 139	description=Ethylene-responsive element binding protein 2
5	215727084	215730071	Zm00001d018161		description=Ferredoxin--nitrite reductase chloroplastic
5	215861734	215871643	Zm00001d018178	Name=bZIP-transcription factor 4	description=ABSCISIC ACID-INSENSITIVE 5-like protein 5
5	215965775	215970551	Zm00001d018183	Name=mitochondrial phosphate transporter1	description= mitochondrial phosphate transporter1
5	216138802	216139080	Zm00001d018192		description=Glutaredoxin 2
5	216589277	216592402	Zm00001d018206		description=Nitrate reductase [NADH] 2
5	218096889	218097874	Zm00001d018298		description=17.4 kDa class III heat shock protein
6	387465	388055	Zm00001d034969		description=Acyl-CoA N-acyltransferases (NAT) superfamily protein
6	87645024	87646346	Zm00001d036418	Name=double B-box zinc finger protein9	description=B-box zinc finger protein 20
6	87796940	87800583	Zm00001d036423		description=Probable methyltransferase PMT27
6	99946589	99956871	Zm00001d036759		description=Phox (PX) domain-containing protein
6	100159664	100160590	Zm00001d036768	Name=MYB-transcription factor 158	description=Transcription factor MYB44
6	121112271	121113696	Zm00001d037323		description=Threonine endopeptidase
6	129184236	129187114	Zm00001d037552
6	150068990	150075970	Zm00001d038164	Name=methyl binding domain	description= methyl binding domain
6	150602516	150603595	Zm00001d038178		description=Probable carboxylesterase 17
6	150651520	150652753	Zm00001d038179		description=Protein NRT1/ PTR FAMILY 3.1
6	150718378	150719322	Zm00001d038180		description=Protein NRT1/ PTR FAMILY 3.1
6	150745127	150748423	Zm00001d038181		description=Protein NRT1/ PTR FAMILY 3.1
6	150861505	150866590	Zm00001d038186		description=Protein NRT1/ PTR FAMILY 3.1
6	151449635	151450009	Zm00001d038203
6	151484233	151503688	Zm00001d038205	Name=barley mlo defense gene homolog8	description= barley mlo defense gene homolog8
6	151749600	151753116	Zm00001d038211		description=Anther-specific proline-rich protein APG
6	151951671	151955702	Zm00001d038222		description=Probable magnesium transporter NIPA4
6	152198261	152212313	Zm00001d038240		description=CSC1-like protein
6	152371396	152373310	Zm00001d038250		description=HSP40/DnaJ peptide-binding protein
6	152782090	152785547	Zm00001d038268		description=Probable anion transporter 3 chloroplastic
6	152871846	152873850	Zm00001d038270	Name=MYB-related-transcription factor 3	description=Duplicated homeodomain-like superfamily protein
6	153040258	153042534	Zm00001d038274		description=Tetratricopeptide repeat (TPR)-like superfamily protein
6	153288564	153289250	Zm00001d038283	Name=OVATE-transcription factor 26	description=Plant-specific domain TIGR01568 family protein
6	153412532	153413338	Zm00001d038287
6	153575715	153576689	Zm00001d038293
6	153617288	153623323	Zm00001d038296	Name=bZIP-transcription factor 87	description=Putative bZIP transcription factor superfamily protein
6	153808873	153811355	Zm00001d038300		description=Putative cytochrome P450 superfamily protein
6	153936300	153956392	Zm00001d038302		description=Protein ROS1
6	154116776	154122027	Zm00001d038306		description=cytoplasmic membrane protein
6	154166396	154172068	Zm00001d038310	Name=TUB-transcription factor 10	description=Tubby-like F-box protein 10
6	154463287	154465019	Zm00001d038325
6	154787169	154790440	Zm00001d038334		description=Protein NRT1/ PTR FAMILY 5.10
6	155277368	155285524	Zm00001d038358		description=Delta-1-pyrroline-5-carboxylate synthase B
6	155606052	155610646	Zm00001d038365		description=Aldo-keto reductase family 4 member C9
6	156033417	156038359	Zm00001d038383
6	156632076	156634134	Zm00001d001456
6	157297323	157308181	Zm00001d038440		description=ribonuclease P family protein
6	157396216	157403388	Zm00001d038445		description=Glutaredoxin family protein
6	157427258	157434499	Zm00001d038449		description=Sorting nexin 2B
6	157664931	157677466	Zm00001d038459		description=Putative VHS/GAT domain containing family protein
6	157965104	157967206	Zm00001d038471		description=U-box domain-containing protein 16
6	158330439	158331059	Zm00001d038478		description=Putative RING zinc finger domain superfamily protein%253B RING-H2 finger protein ATL5A
6	158343817	158344320	Zm00001d038479
6	158345779	158351780	Zm00001d038480
6	158357164	158361534	Zm00001d038481		description=Putative leucine-rich repeat receptor-like protein kinase family protein
6	158501038	158506272	Zm00001d038486		description=Thioredoxin
6	158506547	158512560	Zm00001d038487		description=Putative leucine-rich repeat receptor-like protein kinase family protein
6	158530754	158533955	Zm00001d038491		description=Acetyltransferase NSI
6	158547372	158556691	Zm00001d038494		description=Leucine-rich repeat protein kinase family protein
6	158787568	158795745	Zm00001d038503		description=Leucine-rich repeat protein kinase family protein
6	158957756	158969636	Zm00001d038511	Name=gibberellin 16%2C17-oxidase1	description= gibberellin 1617-oxidase1
6	159118513	159119912	Zm00001d038519
6	159134032	159135950	Zm00001d038520		description=protein kinase domain containing protein expressed
6	159140146	159146205	Zm00001d038522		description=Putative leucine-rich repeat receptor-like protein kinase family protein
6	159346413	159347414	Zm00001d038528		description=RING/U-box superfamily protein
6	159360268	159371993	Zm00001d038530		description=Putative inositol polyphosphate phosphatase (Synaptogenin-like) family protein
6	159376647	159378030	Zm00001d038532		description=Non-specific lipid transfer protein GPI-anchored 2
6	159380616	159390229	Zm00001d038533	Name=centromeric histone H3	description= centromeric histone H3
6	159592404	159594335	Zm00001d038538		description=Ulp1 protease family C-terminal catalytic domain containing protein expressed
6	159595837	159598231	Zm00001d038539
6	159649836	159650908	Zm00001d038542
6	159774069	159775714	Zm00001d038553		description=UDP-glycosyltransferase 87A1
6	159804909	159805962	Zm00001d038558	Name=cystatin3	description= cystatin3
6	160122421	160125471	Zm00001d038571		description=Retrovirus-related Pol polyprotein LINE-1
6	160345574	160353313	Zm00001d038576		description=Calcium-transporting ATPase 4 plasma membrane-type
6	160386564	160392779	Zm00001d038577		description=Probable glucan endo-13-beta-glucosidase BG1
6	160539493	160540155	Zm00001d038585	Name=AP2-EREBP-transcription factor 196	description=Putative AP2/EREBP transcription factor superfamily protein
6	160544943	160563220	Zm00001d038587		description=Protein FRIGIDA-ESSENTIAL 1
6	160888107	160889679	Zm00001d038605		description=Anthocyanidin 3-O-glucosyltransferase
6	160896290	160898350	Zm00001d038608		description=21.7 kDa class VI heat shock protein
6	160902233	160902907	Zm00001d038610		description=S-adenosyl-L-methionine-dependent methyltransferases superfamily protein
6	160995175	160996938	Zm00001d038617		description=SPOROCYTELESS-like EAR-containing protein 1 [Source:UniProtKB/TrEMBL%3BAcc:A0A1D6M7K4]
6	161021494	161023204	Zm00001d038619
6	161162525	161167432	Zm00001d038625	Name=sulfite reductase1	description= sulfite reductase1
6	161720010	161726844	Zm00001d038650		description=xylem bark cysteine peptidase 3
6	161809629	161813487	Zm00001d038651		description=Jacalin-related lectin 3
6	162387696	162391572	Zm00001d038676		description=Probable xyloglucan glycosyltransferase 12
6	162432307	162441044	Zm00001d038678
6	162633220	162633915	Zm00001d038693	Name=C2C2-Dof-transcription factor 10	description=Dof zinc finger protein DOF1.5
6	162814646	162816895	Zm00001d038699		description=O-methyltransferase ZRP4
6	163651425	163652698	Zm00001d038741		description=Pistil-specific extensin-like protein
6	163943780	163943882	ENSRNA049477485	Name=snoZ43	description=Small nucleolar RNA Z43
6	163970657	163972392	Zm00001d038760		description=DAG protein chloroplastic
6	164059209	164060630	Zm00001d038764		description=UDP-glycosyltransferase 88A1
6	164734361	164736397	Zm00001d038801	Name=C2C2-GATA-transcription factor 25	description=GATA transcription factor 12
6	164808309	164812048	Zm00001d038806	Name=heat-shock protein 101	description=Chaperone protein ClpB1
6	164889311	164893253	Zm00001d038809		description=Protein kinase superfamily protein
6	165184068	165186023	Zm00001d038818		description=Probable nucleolar protein 5-1
6	165191824	165199320	Zm00001d038819		description=Non-structural maintenance of chromosomes element 4 homolog A
6	165387137	165388585	Zm00001d038833		description=UDP-glycosyltransferase/ transferase%253B UDP-glycosyltransferase/ transferase%252C transferring glycosyl groups
6	165737562	165747422	Zm00001d038847		description=Beta-galactosidase 17
6	165842393	165845801	Zm00001d038851		description=Nucleosome assembly protein 1%3B2
6	165894363	165897634	Zm00001d038853
6	165907842	165913299	Zm00001d038857		description=Chaperonin CPN60-like 2 mitochondrial
6	165996710	165998543	Zm00001d038860		description=AT5g56980/MHM17_10
6	166018995	166021892	Zm00001d038861		description=IQ-domain 6
6	166027177	166029976	Zm00001d038862		description=Cytokinin riboside 5'-monophosphate phosphoribohydrolase LOG8
6	166062936	166069293	Zm00001d038864		description=DUF1639 family protein
6	166071467	166073407	Zm00001d038865		description=60S ribosomal protein L28-1
6	166103499	166106031	Zm00001d038867
6	166206492	166209003	Zm00001d038874		description=Probable polygalacturonase
6	166212064	166214501	Zm00001d038875		description=Polygalacturonase
6	166348689	166350140	Zm00001d038884		description=Putative MAPKKK family protein kinase
6	166502169	166507064	Zm00001d038891		description=Phosphoethanolamine N-methyltransferase 3
6	166669163	166674601	Zm00001d038897		description=Short-chain dehydrogenase/reductase SDRA
6	166851524	166851829	Zm00001d038911		description=Non-specific lipid-transfer protein 2
6	166868333	166868629	Zm00001d038913	Name=lipid transfer protein1	description= lipid transfer protein1
6	167142116	167146479	Zm00001d038925
6	167331966	167332418	Zm00001d001476
6	167402294	167403996	Zm00001d038946		description=Electron carrier/ electron transporter/ iron ion binding protein
6	167441439	167452966	Zm00001d038948		description=Glutamate synthase 1 [NADH] chloroplastic
6	167539996	167542087	Zm00001d038949		description=DNA-binding enhancer protein-related
6	167608116	167608913	Zm00001d001479
6	167699425	167706622	Zm00001d038959		description=O-acyltransferase WSD1
6	167867757	167868857	Zm00001d038965		description=Purine permease
6	167985167	167988002	Zm00001d038969		description=Eukaryotic aspartyl protease family protein
6	168091533	168092573	Zm00001d038979		description=ARM repeat superfamily protein
6	168207284	168208191	Zm00001d038984	Name=photosystem I H subunit1	description= photosystem I H subunit1
6	168300047	168303054	Zm00001d038989		description=Rop guanine nucleotide exchange factor 9
6	168304564	168305262	Zm00001d038990		description=Tumor protein-like protein%253B Tumor-related protein-like
6	168305998	168308728	Zm00001d038991		description=Protein MALE DISCOVERER 2
6	168339522	168342020	Zm00001d038992		description=Glyoxal oxidase
6	168516159	168518324	Zm00001d039000		description=HSP40/DnaJ peptide-binding protein
6	168638018	168645494	Zm00001d039005		description=Guanylate-binding family protein
7	30361511	30366868	Zm00001d019370
7	35647688	35648029	Zm00001d019474		description=Receptor-like protein kinase-related family protein
7	105042700	105045690	Zm00001d020306		description=Strictosidine synthase 3
7	114139355	114140955	Zm00001d020434		description=NAD(P)H-quinone oxidoreductase subunit L chloroplastic
7	114149831	114152030	Zm00001d020437		description=[Fructose-bisphosphate aldolase]-lysine N-methyltransferase chloroplastic
7	138349670	138351460	Zm00001d020976
7	139367277	139370608	Zm00001d020986		description=O-fucosyltransferase family protein
7	140301367	140304077	Zm00001d021009
7	140312368	140312751	Zm00001d021010
7	140560504	140562258	Zm00001d021020		description=60S ribosomal protein L32
7	140788218	140790075	Zm00001d021025		description=Chloroplastic quinone-oxidoreductase
7	140954748	140973549	Zm00001d021032		description=RING/U-box superfamily protein
7	141043659	141044789	Zm00001d021040		description=Protein FATTY ACID EXPORT 1 chloroplastic
7	141160173	141163742	Zm00001d021046		description=Oleoyl-acyl carrier protein thioesterase 2 chloroplastic
7	141602512	141603882	Zm00001d021053		description=Putative pentatricopeptide repeat-containing protein
7	141819946	141821175	Zm00001d021059	Name=stearoyl-acyl-carrier-protein desaturase8	description= stearoyl-acyl-carrier-protein desaturase8
7	142080504	142083844	Zm00001d021069	Name=NAC-transcription factor 63
7	142843160	142846598	Zm00001d021104		description=saposin B domain-containing protein
7	143327655	143344805	Zm00001d021127		description=ATP-dependent RNA helicase DRS1
7	143453893	143458551	Zm00001d021132		description=3-hydroxyisobutyryl-CoA hydrolase 1
7	144130204	144132248	Zm00001d021150
7	144473134	144476244	Zm00001d021163		description=Nucleobase-ascorbate transporter 12
7	145134997	145143590	Zm00001d021180		description=BAG-associated GRAM protein 1
7	145200471	145202078	Zm00001d021185
7	145448190	145449889	Zm00001d021192
7	145649789	145651701	Zm00001d021197		description=Alpha-L-fucosidase 1
7	145766119	145767552	Zm00001d021200		description=3-ketoacyl-CoA synthase
7	145864711	145878539	Zm00001d021202		description=Inactive LRR receptor-like serine/threonine-protein kinase BIR2
7	146027044	146027784	Zm00001d021205	Name=AP2-EREBP-transcription factor 36	description=Dehydration-responsive element-binding protein 1B
7	146038525	146039307	Zm00001d021208	Name=AP2-EREBP-transcription factor 115	description=Dehydration-responsive element-binding protein 1B
7	146443504	146445498	Zm00001d021217
7	146658310	146664494	Zm00001d021236	Name=outer cell layer3	description=Homeodomain leucine zipper family IV protein
7	146744186	146756271	Zm00001d021241
7	146809739	146813458	Zm00001d021245		description=Rhodanese-like domain containing protein
7	147163459	147165213	Zm00001d021263	Name=HSF-transcription factor 10	description=Heat stress transcription factor B-2b
7	147632776	147636889	Zm00001d021278	Name=double B-box zinc finger protein10	description=B-box zinc finger protein 19
7	148061214	148062014	Zm00001d021290	Name=SHI/STY (SRS)-transcription factor 8	description=Protein SHI RELATED SEQUENCE 1
7	148065548	148071232	Zm00001d021291		description=Two-component response regulator-like APRR9
7	149024878	149026351	Zm00001d021329		description=Agmatine coumaroyltransferase
7	149125322	149126224	Zm00001d021334		description=Thioredoxin-like protein CDSP32 chloroplastic
7	149326226	149327233	Zm00001d021340
7	149327183	149328523	Zm00001d021341
7	149411835	149416604	Zm00001d021342		description=Protein kinase superfamily protein
7	149456670	149462712	Zm00001d021344		description=basic helix-loop-helix (bHLH) DNA-binding superfamily protein
7	149522562	149527823	Zm00001d021345		description=Protein argonaute 1
7	149691857	149697713	Zm00001d021351		description=Probable plastid-lipid-associated protein 12 chloroplastic
7	150060843	150064672	Zm00001d021367		description=glutamate-ammonia ligases%3Bcatalytics%3Bglutamate-ammonia ligases
7	150322957	150329229	Zm00001d021378		description=ARM repeat superfamily protein
7	150548777	150553253	Zm00001d021382		description=MMS19 nucleotide excision repair protein homolog
7	150576886	150578342	Zm00001d021383		description=Putative methyltransferase
7	150642387	150642920	Zm00001d021386		description=Zinc finger protein 2
7	150693937	150694821	Zm00001d021391		description=Blue copper protein
7	151517790	151529322	Zm00001d021413		description=Protein PIN-LIKES 7
7	151676951	151685060	Zm00001d021419		description=Nicotinate-nucleotide pyrophosphorylase [carboxylating] chloroplastic
7	152283433	152284280	Zm00001d021435	Name=light harvesting chlorophyll a/b binding protein2	description=Chlorophyll a-b binding protein 1%252C chloroplastic
7	152335837	152341211	Zm00001d021442	Name=NLP-transcription factor 13	description=Protein NLP2
7	152348851	152351171	Zm00001d021444		description=Monooxygenase/ oxidoreductase
7	152372379	152379941	Zm00001d021446		description=Protein DETOXIFICATION 45 chloroplastic
7	152385950	152390797	Zm00001d021448		description=root hair specific 17
7	152444914	152447392	Zm00001d021450		description=Cytokinin riboside 5'-monophosphate phosphoribohydrolase LOG5
7	152609402	152609851	Zm00001d021454		description=SAUR55-auxin-responsive SAUR family member
7	152649238	152649669	Zm00001d021457		description=Auxin-responsive protein SAUR61
7	152802563	152803452	Zm00001d021465		description=AIG2-like (avirulence induced gene) family protein
7	153018015	153030585	Zm00001d021469		description=Glutathione S-transferase F9
7	153075349	153079559	Zm00001d021470	Name=glutathione transferase16	description= glutathione transferase16
7	153938883	153943526	Zm00001d021491		description=Disease resistance RPP13-like protein 4
7	154609186	154616951	Zm00001d021512		description=small G protein family protein / RhoGAP family protein
7	154782638	154784305	Zm00001d021515		description=Photosynthetic NDH subunit of subcomplex B 3 chloroplastic
7	173165811	173167796	Zm00001d022227	Name=MYB-transcription factor 70	description= fused leaves1
7	173624342	173626482	Zm00001d022250		description=SNARE associated Golgi protein family
8	9155987	9157111	Zm00001d008454
8	9190651	9194067	Zm00001d008455		description=ARM repeat superfamily protein
8	10753073	10753318	ENSRNA049997483	Name=zma-MIR159a
8	10753073	10753318	zma-MIR159a
8	11010982	11032589	Zm00001d008511		description=ARM repeat superfamily protein
8	11119067	11126014	Zm00001d008512		description=ABC-2 type transporter family protein
8	11254564	11256361	Zm00001d008514		description=E3 ubiquitin-protein ligase SINA-like 10
8	11261176	11263689	Zm00001d008515		description=Heavy metal transport/detoxification superfamily protein
8	11273752	11279847	Zm00001d008517		description=Actin-interacting protein 1-2
8	11791237	11792902	Zm00001d008527
8	12036018	12039062	Zm00001d008535
8	12206708	12207526	Zm00001d007992
8	12212422	12212835	Zm00001d008539
8	12307835	12308398	Zm00001d008540
8	12316480	12317077	Zm00001d008541
8	13125997	13131966	Zm00001d008563
8	13548214	13555561	Zm00001d008581		description=LEAF RUST 10 DISEASE-RESISTANCE LOCUS RECEPTOR-LIKE PROTEIN KINASE-like 1.1
8	13559421	13560659	Zm00001d008582
8	13719470	13722383	Zm00001d008591		description=Octicosapeptide/Phox/Bem1p family protein
8	14053223	14055531	Zm00001d008599		description=proline-rich family protein
8	14167587	14170217	Zm00001d008602	Name=MYB-related-transcription factor 21	description=Duplicated homeodomain-like superfamily protein
8	14469570	14471588	Zm00001d008612	Name=Homeobox-transcription factor 26	description=Putative homeobox DNA-binding domain superfamily protein
8	14951976	14953401	Zm00001d008620		description=Metallothionein-like protein 2A
8	14957180	14962557	Zm00001d008621		description=Protein TRM32
8	15000230	15005452	Zm00001d008622		description=Synaptic glycoprotein SC2
8	15007294	15014756	Zm00001d008623		description=Very-long-chain (3R)-3-hydroxyacyl-CoA dehydratase PASTICCINO 2
8	15223267	15228122	Zm00001d008628		description=Gamma-glutamyltranspeptidase 3
8	15371587	15372582	Zm00001d008634		description=Probable carboxylesterase 15
8	16986395	16986763	Zm00001d008681		description=Ultraviolet-B-repressible protein
8	17288750	17293014	Zm00001d008691	Name=autophagy18d	description=Autophagy-related protein 18c
8	17302671	17304251	Zm00001d008693		description=alpha/beta-Hydrolases superfamily protein
8	17318353	17319271	Zm00001d008695	Name=MYB-transcription factor 76	description=Putative MYB DNA-binding domain superfamily protein
8	17461549	17462748	Zm00001d008706		description=Photosystem I reaction center subunit XI chloroplastic
8	17623710	17628383	Zm00001d008716		description=NEP-interacting protein 1
8	17728577	17733628	Zm00001d008720		description=Adenine nucleotide alpha hydrolases-like superfamily protein
8	17742180	17743370	Zm00001d008721		description=Adenine nucleotide alpha hydrolases-like superfamily protein
8	18999372	19006082	Zm00001d008752		description=Calcium-dependent lipid-binding (CaLB domain) family protein
8	19580474	19585935	Zm00001d008772		description=Serinc-domain containing serine and sphingolipid biosynthesis protein
8	71633217	71633612	Zm00001d009583
8	71702017	71706338	Zm00001d009587		description=Putative MAP kinase family protein
8	106104980	106108483	Zm00001d010249		description=MLO-like protein
8	106962806	106966802	Zm00001d010274	Name=isopentenyl pyrophosphate isomerase2	description= isopentenyl pyrophosphate isomerase2
8	107515891	107520432	Zm00001d010285
8	107773334	107777619	Zm00001d010290		description=Cysteine proteinase inhibitor 6
8	107889974	107895386	Zm00001d010292
8	108162420	108163298	Zm00001d010295		description=E3 ubiquitin-protein ligase SGR9 amyloplastic
8	108442669	108447132	Zm00001d010300
8	110625726	110630782	Zm00001d010343		description=alpha/beta-Hydrolases superfamily protein
8	110723988	110728730	Zm00001d010353		description=alpha/beta-Hydrolases superfamily protein
8	111039047	111041287	Zm00001d010360	Name=Aux/IAA-transcription factor 37	description=Auxin-responsive protein IAA26
8	111702614	111708099	Zm00001d010373		description=Stem glycoprotein
8	112759342	112760037	Zm00001d010396
8	112885015	112906534	Zm00001d010400		description=Retrovirus-related Pol polyprotein LINE-1
8	113170632	113175869	Zm00001d010404		description=Cyclin superfamily protein%252C putative
8	113391975	113394577	Zm00001d010410	Name=tonoplast intrinsic protein4	description= tonoplast intrinsic protein4
8	113888005	113894973	Zm00001d010416		description=Transcription factor bHLH133
8	114332704	114333342	Zm00001d010420
8	114567038	114574956	Zm00001d010428
8	115007050	115007858	Zm00001d010434		description=Arabinogalactan peptide 20
8	115433371	115435609	Zm00001d010445		description=Abscisic acid receptor PYL9
8	115726579	115728797	Zm00001d010451		description=GDSL esterase/lipase
8	115783056	115786089	Zm00001d010452		description=Nudix hydrolase 11
8	116485946	116490538	Zm00001d010463		description=Phospholipase A1-Igamma1 chloroplastic
8	117531416	117535036	Zm00001d010489
8	118061497	118063581	Zm00001d010496
8	118419214	118420164	Zm00001d010507		description=Protein LIGHT-DEPENDENT SHORT HYPOCOTYLS 5
8	118706704	118714516	Zm00001d010514		description=RING-H2 finger protein ATL5H
8	119419987	119423027	Zm00001d010529		description=Probable mediator of RNA polymerase II transcription subunit 37c
8	120340485	120345629	Zm00001d010558		description=Protein NETWORKED 2D
8	120517493	120519263	Zm00001d010566		description=40S ribosomal protein S23-2
8	120764519	120771258	Zm00001d010576		description=Haloacid dehalogenase-like hydrolase (HAD) superfamily protein
8	120764599	120767763	Zm00001d010577
8	121034171	121034963	Zm00001d010586		description=PEBP (phosphatidylethanolamine-binding protein) family protein
8	121126170	121128814	Zm00001d010588	Name=pyruvate decarboxylase1	description= pyruvate decarboxylase1
8	121427947	121428690	Zm00001d010596		description=Protein LIGHT-DEPENDENT SHORT HYPOCOTYLS 5
8	121656899	121661464	Zm00001d010604		description=Sorting nexin 2B
8	121844509	121845862	Zm00001d010613		description=EPIDERMAL PATTERNING FACTOR-like protein 6
8	121855840	121858325	Zm00001d010614		description=40S ribosomal protein S26
8	122041622	122047006	Zm00001d010618		description=Putative ubiquitin-conjugating enzyme family
8	122090727	122091387	Zm00001d010621
8	122780822	122786723	Zm00001d010639		description=Endoplasmic reticulum vesicle transporter protein
8	122873951	122875909	Zm00001d010646	Name=set domain gene105	description=Putative histone-lysine N-methyltransferase family protein
8	122943984	122944412	Zm00001d010649		description=Probable calcium-binding protein CML20
8	122974459	122974956	Zm00001d010651
8	122977749	122978627	Zm00001d010652		description=EID1-like F-box protein 3
8	123211885	123212355	Zm00001d010661		description=VQ motif family protein [Source:UniProtKB/TrEMBL%3BAcc:B6TDS5]
8	123263372	123266229	Zm00001d010662		description=SNF1-related protein kinase regulatory subunit beta-1
8	124738149	124740137	Zm00001d010693		description=21.7 kDa class VI heat shock protein
8	124866876	124869473	Zm00001d010697		description=Indole-3-acetic acid-amido synthetase GH3.6
8	124955542	124959901	Zm00001d010698		description=NAD(P)H dehydrogenase (quinone) FQR1
8	124961672	124970124	Zm00001d010700		description=G-type lectin S-receptor-like serine/threonine-protein kinase B120
8	124974034	124976815	Zm00001d010702
8	125143906	125145144	Zm00001d010705		description=F-box domain containing protein
8	125482282	125483096	Zm00001d010715		description=Photosystem II reaction center W protein chloroplastic
8	126378027	126380486	Zm00001d010736		description=O-methyltransferase ZRP4
8	126441198	126441836	Zm00001d010740	Name=C2C2-Dof-transcription factor 44	description=Dof zinc finger protein DOF1.5
8	126505748	126509894	Zm00001d010744		description=Gamma-glutamyl hydrolase 1
8	126886521	126888573	Zm00001d010753		description=Trihelix transcription factor ASIL2
8	127187617	127188279	Zm00001d010759		description=DNA-binding WRKY
8	127677367	127682293	Zm00001d010784		description=Peptidyl-tRNA hydrolase II (PTH2) family protein
8	127752529	127754303	Zm00001d010785	Name=C2C2-GATA-transcription factor 32	description=Putative GATA transcription factor family protein
8	127880214	127887153	Zm00001d010791		description=Histidine-containing phosphotransfer protein 4
8	127989073	127989276	Zm00001d010792
8	127990790	127992883	Zm00001d010793		description=Probable pectinesterase 53
8	128212334	128215465	Zm00001d010800		description=Zinc finger CCCH domain-containing protein 54
8	128678323	128678739	Zm00001d010814		description=AtS40-3
8	128844845	128851355	Zm00001d010823		description=CASC3/Barentsz eIF4AIII binding
8	129176182	129180135	Zm00001d010828		description=alpha/beta-Hydrolases superfamily protein
8	129739531	129743950	Zm00001d010840		description=triacylglycerol lipase-like 1
8	148735824	148737798	Zm00001d011367		description=Formate dehydrogenase chloroplastic/mitochondrial
8	148751586	148753559	Zm00001d011368		description=Formate dehydrogenase chloroplastic/mitochondrial
8	149473967	149475758	Zm00001d011396		description=GTPase activating protein%253B Putative calcium-dependent lipid-binding (CaLB domain) family protein
8	149523666	149538687	Zm00001d011401		description=Protein SGT1 homolog A
8	149539154	149540733	Zm00001d011403	Name=WRKY-transcription factor 47	description=Putative WRKY DNA-binding domain superfamily protein
8	150561818	150568628	Zm00001d011446		description=NAD(P)-binding Rossmann-fold superfamily protein
8	159972201	159972850	Zm00001d011722
9	593529	593969	Zm00001d044728		description=Class I heat shock protein 3
9	639206	642733	Zm00001d044729		description=Cysteine-rich repeat secretory protein 15
9	8477460	8482074	Zm00001d044970		description=Probable tyrosine-protein phosphatase
9	15996069	15996644	Zm00001d045204	Name=AP2-EREBP-transcription factor 122	description=Putative AP2/EREBP transcription factor superfamily protein
9	16041474	16043191	Zm00001d045205	Name=F-box domain and LRR containing protein1	description=F-box protein
9	16076158	16081626	Zm00001d045206	Name=Caffeoyl CoA O-methyltransferase2	description= Caffeoyl CoA O-methyltransferase2
9	20086171	20089629	Zm00001d045377
9	20246525	20250932	Zm00001d045384		description=Superoxide dismutase [Fe] 3 chloroplastic
9	22969331	22971755	Zm00001d045456		description=Zinc finger (C3HC4-type RING finger) family protein
9	26665481	26667528	Zm00001d045558		description=Phosphorylase superfamily protein
9	26893302	26894615	Zm00001d045565		description=Haloacid dehalogenase-like hydrolase domain-containing protein Sgpp
9	26899323	26905529	Zm00001d045567		description=WAT1-related protein
9	52746458	52750562	Zm00001d045987		description=NEP-interacting protein 1
9	53061463	53078264	Zm00001d045993	Name=poor homologous synapsis1	description= poor homologous synapsis1
9	55198279	55201502	Zm00001d046017		description=transcription regulators
9	56386766	56389222	Zm00001d046029		description=Aluminum-activated malate transporter 10
9	61153377	61158758	Zm00001d046069
9	61830329	61833379	Zm00001d046077		description=Retrovirus-related Pol polyprotein LINE-1
9	63010300	63011576	Zm00001d046096	Name=bHLH-transcription factor 34	description=Putative HLH DNA-binding domain superfamily protein
9	63973033	63977492	Zm00001d046112		description=Spermidine synthase
9	64440180	64447129	Zm00001d046119		description=Retrovirus-related Pol polyprotein LINE-1
9	64743033	64750166	Zm00001d046121		description=Putative ENTH/ANTH/VHS superfamily protein
9	65016935	65018861	Zm00001d046126	Name=NAC-transcription factor 124	description=Putative NAC domain transcription factor superfamily protein
9	69832361	69835071	Zm00001d046180		description=Protein RRP6-like 2
9	70336697	70338169	Zm00001d046187		description=Peroxidase 52
9	70766239	70767030	Zm00001d046188		description=AT5g56980/MHM17_10
9	71540699	71544281	Zm00001d046200
9	71959994	71962191	Zm00001d046207		description=Cytochrome P450 711A1
9	73627690	73628337	Zm00001d046232		description=Retrovirus-related Pol polyprotein LINE-1
9	73800614	73803659	Zm00001d046234		description=Inositol oxygenase 2
9	74740160	74741833	Zm00001d046238		description=Putative MATE efflux family protein
9	76069077	76071837	Zm00001d046242		description=Putative ferroportin-domain family protein
9	77157097	77159734	Zm00001d046262		description=Isocitrate dehydrogenase
9	77253429	77264289	Zm00001d046263		description=Amino acid permease 6
9	77628402	77638335	Zm00001d046277		description=ABC transporter G family member 29
9	79387374	79387846	Zm00001d046302
9	79891074	79891868	Zm00001d046314		description=DUF1685 family protein
9	81848013	81848882	Zm00001d046343
9	83801694	83806040	Zm00001d046357		description=Beta-galactosidase
9	84130315	84134438	Zm00001d046363		description=S-adenosyl-L-methionine-dependent methyltransferases superfamily protein
9	85338058	85340982	Zm00001d046377		description=Serine/threonine-protein phosphatase
9	85537115	85537531	Zm00001d046378
9	86006967	86015173	Zm00001d046383		description=Protein NRT1/ PTR FAMILY 4.6
9	86533090	86547022	Zm00001d046385
9	87184189	87186144	Zm00001d046397
9	89628667	89634933	Zm00001d046434		description=Acyl-CoA-binding domain-containing protein 4
9	89997220	90002364	Zm00001d046442		description=SOUL heme-binding family protein
9	91052390	91053739	Zm00001d046465
9	91362877	91363830	Zm00001d027137
9	91365330	91387542	Zm00001d046468		description=Coatomer subunit beta'-3
9	91463414	91463893	Zm00001d046471		description=Multiprotein-bridging factor 1c
9	92349534	92350909	Zm00001d046493	Name=heme oxygenase3	description= heme oxygenase3
9	92565565	92566347	Zm00001d046499		description=DNA binding%3BDNA-directed RNA polymerases
9	93175886	93176939	Zm00001d046510
9	93396849	93405759	Zm00001d046517	Name=MYB-transcription factor 122	description=Putative MYB DNA-binding domain superfamily protein
9	93438079	93444871	Zm00001d046518	Name=MYB-transcription factor 82	description=Putative MYB DNA-binding domain superfamily protein
9	93484168	93490984	Zm00001d046519	Name=MYB-transcription factor 87	description=Putative MYB DNA-binding domain superfamily protein
9	94210411	94211858	Zm00001d046530		description=Tetratricopeptide repeat (TPR)-like superfamily protein
9	94503734	94505652	Zm00001d046535		description=Phosphatidylcholine:diacylglycerol cholinephosphotransferase 1
9	97600588	97605812	Zm00001d046591	Name=vacuolar-type H+-pyrophosphatase5	description= vacuolar-type H+-pyrophosphatase5
9	97904170	97905084	Zm00001d046596		description=Bifunctional inhibitor/lipid-transfer protein/seed storage 2S albumin superfamily protein
9	97932553	97936078	Zm00001d046598
9	99835780	99840197	Zm00001d046633		description=Expressed protein%3B protein
9	100666621	100672101	Zm00001d046655		description=Putative STRUBBELIG family receptor protein kinase
9	100696114	100700352	Zm00001d046656		description=Nudix hydrolase 10
9	100815624	100818428	Zm00001d046658		description=Intron maturase type II family protein
9	101398198	101398671	Zm00001d046667
9	101918009	101919782	Zm00001d046676		description=tryptophan synthase beta type 2
9	102108722	102110014	Zm00001d046680		description=Pentatricopeptide repeat-containing protein
9	102111367	102115915	Zm00001d046681		description=Glucomannan 4-beta-mannosyltransferase 2
9	102206373	102207074	Zm00001d046682		description=Peroxiredoxin-5
9	102808063	102808878	Zm00001d046696		description=AT-hook motif nuclear-localized protein 29
9	103118697	103123559	Zm00001d046714		description=NAD(P)-binding Rossmann-fold superfamily protein
9	104406708	104413242	Zm00001d046754
9	104439437	104448739	Zm00001d046755	Name=ARR-B-transcription factor 4	description=Putative two-component response regulator family protein
9	104860939	104865028	Zm00001d046765		description=Putative glycosyl hydrolase of unknown function (DUF1680)
9	105671172	105677613	Zm00001d046779		description=Glutathione synthetase chloroplastic
9	105685188	105703639	Zm00001d046781	Name=barley mlo defense gene homolog7	description= barley mlo defense gene homolog7
9	105852291	105853661	Zm00001d046783	Name=GRAS-transcription factor 70	description=Scarecrow-like protein 18
9	105955854	105957260	Zm00001d046786		description=Photosystem I chlorophyll a/b-binding protein 3-1 chloroplastic
9	107325990	107327852	Zm00001d046823	Name=GNAT-transcription factor 35	description=Probable N-acetyltransferase HLS1
9	107368857	107369638	Zm00001d046824
9	107713405	107718380	Zm00001d046831		description=Probable protein phosphatase 2C 21
9	108232878	108234260	Zm00001d046839
9	108251855	108253237	Zm00001d046842
9	108429574	108430215	Zm00001d046859		description=Putative RING zinc finger domain superfamily protein
9	108535285	108541755	Zm00001d046865		description=Protein ECERIFERUM 3
9	108634742	108641680	Zm00001d046873		description=Probable ADP-ribosylation factor GTPase-activating protein AGD5
9	108788380	108788625	Zm00001d046883		description=Diphthamide biosynthesis protein 3
9	109553690	109556819	Zm00001d046900		description=Grx_C4-glutaredoxin subgroup I
9	109930589	109934102	Zm00001d046906		description=Squamosa promoter-binding-like protein 13A
9	110415245	110418645	Zm00001d046916		description=CASP-like protein 10
9	110797888	110799072	Zm00001d046921		description=F-box protein AFR
9	111032442	111034142	Zm00001d046925	Name=C2C2-CO-like-transcription factor 13	description=Zinc finger protein CONSTANS-LIKE 5
9	111174328	111183242	Zm00001d046928	Name=histidine kinase5	description= histidine kinase5
9	111766412	111777865	Zm00001d046935		description=cryptochrome 3
9	111794987	111797460	Zm00001d046937	Name=bZIP-transcription factor 17	description=Basic leucine zipper 9
9	111957797	111959038	Zm00001d046940		description=Peptidyl-prolyl cis-trans isomerase
9	112208355	112213865	Zm00001d046945		description=Vacuolar sorting receptor 7
9	112393237	112394668	Zm00001d046950		description=Protein UNUSUAL FLORAL ORGANS
9	112604813	112609405	Zm00001d046952		description=Allantoate deiminase
9	112757063	112765386	Zm00001d046953		description=Copper-transporting ATPase RAN1
9	113387293	113387613	Zm00001d046966
9	113789238	113792145	Zm00001d046975
9	114886662	114886964	Zm00001d047000
9	115242444	115244729	Zm00001d047013		description=Pentatricopeptide repeat-containing protein mitochondrial
9	115522400	115533199	Zm00001d047020		description=ADP-ribosylation factor GTPase-activating protein AGD10
9	115708968	115711076	Zm00001d047025	Name=PLATZ-transcription factor 13	description=PLATZ transcription factor family protein
9	116292816	116293433	Zm00001d047037		description=Abscisic acid receptor PYR1
9	116546007	116554269	Zm00001d047044		description=RING/FYVE/PHD zinc finger superfamily protein
9	116596995	116599722	Zm00001d047046		description=DAR GTPase 2 mitochondrial
9	116811920	116813239	Zm00001d047055		description=Formin-like protein 18
9	117367859	117454573	Zm00001d047074		description=pleckstrin homology (PH) domain-containing protein
9	117527633	117530311	Zm00001d047077		description=Beta-amylase 3 chloroplastic
9	117752835	117754586	Zm00001d047081	Name=C2C2-GATA-transcription factor 28	description=GATA transcription factor 2
9	117848739	117851380	Zm00001d047086		description=transcription regulators
9	118702340	118710669	Zm00001d047103		description=Gallus gallus similar to zinc finger RNA binding protein (LOC427010) mRNA.
9	118803843	118807278	Zm00001d047107
9	137806640	137809629	Zm00001d047638		description=Calcium-dependent phosphotriesterase superfamily protein
9	137872908	137874613	Zm00001d047640	Name=thiaminase3	description= thiaminase3
9	152369266	152374321	Zm00001d048201		description=Inositol-3-phosphate synthase isozyme 1
9	152376010	152377305	Zm00001d048202		description=Putative bifunctional inhibitor/LTP/seed storage protein family
9	152522849	152523868	Zm00001d048209		description=hydroxyproline-rich glycoprotein family protein
9	152568647	152571790	Zm00001d048212		description=Retrovirus-related Pol polyprotein LINE-1
9	152594876	152596298	Zm00001d048215		description=WW domain containing protein expressed
9	152662248	152663954	Zm00001d048219		description=RmlC-like cupins superfamily protein
9	152679685	152682225	Zm00001d048222		description=Ras-related protein RABA4a
9	152684333	152685043	Zm00001d048224		description=VQ motif-containing protein 9
10	3631087	3632656	Zm00001d023336	Name=WRKY-transcription factor 91	description=Putative WRKY DNA-binding domain superfamily protein
10	3824749	3825745	Zm00001d023343	Name=phospholipid transfer protein homolog1	description= phospholipid transfer protein homolog1
10	3840240	3855248	Zm00001d023344	Name=umc1318	description=ATP-dependent DNA helicase [Source:UniProtKB/TrEMBL%3BAcc:A0A1D6ISY1]
10	11356944	11358687	Zm00001d023596		description=Amino acid permease 2
10	63044232	63050120	Zm00001d024305		description=Methyl-CpG-binding domain-containing protein 13
10	88844039	88846874	Zm00001d024808		description=Probable GTP-binding protein OBGM mitochondrial
10	89995765	90000359	Zm00001d024828		description=MIF4G domain-containing protein / MA3 domain-containing protein
10	90131666	90133501	Zm00001d024831		description=Putative pentatricopeptide repeat family protein
10	90195370	90197131	Zm00001d024835		description=Putative thioredoxin superfamily protein
10	90669584	90671414	Zm00001d024854		description=Lipopolysaccharide-modifying protein
10	91044298	91048715	Zm00001d024861		description=Double-stranded RNA-binding protein 3
10	92160789	92164199	Zm00001d024883		description=C2H2-like zinc finger protein
10	92330298	92332490	Zm00001d024885		description=Putative WD40-like beta propeller repeat family protein
10	92761097	92763080	Zm00001d024886		description=Zinc finger (C3HC4-type RING finger) family protein
10	93455728	93462424	Zm00001d024894		description=Putative thioredoxin superfamily protein
10	93908317	93911235	Zm00001d024903	Name=heat shock protein%2C 90 kDa	description= heat shock protein 90 kDa
10	94179848	94182817	Zm00001d024904		description=OSJNBb0004G23.12 protein%3B OSJNBb0085F13.7 protein
10	94232837	94233649	Zm00001d024905	Name=GeBP-transcription factor 11	description= protein%3B Tyrosine specific protein phosphatase-like
10	94248547	94249743	Zm00001d024906		description=Glyoxylate/hydroxypyruvate reductase HPR3
10	94904945	94907435	Zm00001d024916		description=UNC93-like protein 2
10	95315410	95315850	Zm00001d024926
10	95363430	95366568	Zm00001d024927		description=RING/U-box superfamily protein
10	95451163	95473347	Zm00001d024928		description=Zinc finger CCCH domain-containing protein 24
10	95933122	95935711	Zm00001d024939		description=Phosphoglycerate mutase-like protein
10	96012099	96015989	Zm00001d024940		description=Zinc finger (C3HC4-type RING finger) family protein
10	96969512	96970459	Zm00001d024963	Name=glutathione transferase22	description=Glutathione S-transferase GSTU6
10	98626467	98629272	Zm00001d024999
10	99635843	99638554	Zm00001d025011		description=Polyketide cyclase/dehydrase and lipid transport superfamily protein
10	99642235	99660548	Zm00001d025012		description=ABC transporter G family member 34
10	100055458	100060317	Zm00001d025023		description=Probable 2-oxoacid dependent dioxygenase
10	100955562	100957474	Zm00001d025037		description=UDP-glycosyltransferase 74B1
10	101206922	101214479	Zm00001d025043		description=ABC transporter C family member 4
10	101525953	101527964	Zm00001d025047		description=APx3-Peroxisomal Ascorbate Peroxidase
10	101807624	101808929	Zm00001d025053		description=Heat shock 70 kDa protein 14
10	102746049	102761434	Zm00001d025074
10	102925323	102930804	Zm00001d025082		description=Glycosyl hydrolase family 10 protein
10	104219161	104224390	Zm00001d025103		description= amine oxidase1
10	105633063	105634956	Zm00001d025126		description=CASP-like protein 7
10	105805029	105805469	Zm00001d025132		description=Nucleic acid-binding OB-fold-like protein
10	106318787	106321238	Zm00001d025141	Name=bHLH-transcription factor 108	description=basic helix-loop-helix (bHLH) DNA-binding superfamily protein
10	106777076	106807515	Zm00001d025153		description=Phospholipid-transporting ATPase 2
10	106822941	106826054	Zm00001d025155		description=Retrovirus-related Pol polyprotein LINE-1
10	106964303	106965933	Zm00001d025160		description=60S ribosomal protein L35
10	107141907	107144555	Zm00001d025166		description=Putative quinone-oxidoreductase homolog chloroplastic
10	107181381	107187909	Zm00001d025167		description=WPP domain-associated protein
10	107649554	107658355	Zm00001d025174		description=S-adenosyl-L-methionine-dependent methyltransferases superfamily protein
10	107678368	107680629	Zm00001d025175		description=S-adenosyl-L-methionine-dependent methyltransferases superfamily protein
10	109021465	109023516	Zm00001d025204
10	110194156	110198209	Zm00001d025228
10	110237211	110238274	Zm00001d025233	Name=ABI3-VP1-transcription factor 21	description=B3 domain-containing protein
10	110941782	110942219	Zm00001d025247		description=Beta-13-N-Acetylglucosaminyltransferase family protein
10	111052327	111062223	Zm00001d025249		description=catalytics%3Bhydrolases
10	111794815	111806723	Zm00001d025265		description=Acyl carrier protein
10	112165803	112168114	Zm00001d025274
10	112746456	112748292	Zm00001d025289		description=protein kinase domain containing protein expressed
10	113838140	113839870	Zm00001d025310		description=Putative RING zinc finger domain superfamily protein
10	114036152	114037488	Zm00001d025319		description=Probable BOI-related E3 ubiquitin-protein ligase 2
10	114337276	114339155	Zm00001d025330
10	114461652	114462911	Zm00001d025333		description=Arogenate dehydratase/prephenate dehydratase 6 chloroplastic
10	114917651	114919660	Zm00001d025343		description=Purple acid phosphatase 22
10	115025067	115026953	Zm00001d025346	Name=phosphatidylethanolamine-binding protein	description=Protein TERMINAL FLOWER 1
10	115194757	115195221	Zm00001d025352		description=Ferredoxin-3 chloroplastic
10	115243957	115246970	Zm00001d025354	Name=invertase cell wall5	description=Beta-fructofuranosidase insoluble isoenzyme CWINV2
10	115983810	115986401	Zm00001d025373		description=Aluminum-activated malate transporter 8
10	116159439	116160239	Zm00001d025374		description=VQ motif family protein
10	116183302	116188328	Zm00001d025375		description=Transducin/WD40 repeat-like superfamily protein
10	116719903	116722089	Zm00001d025389		description=ubiquitin interaction motif-containing protein
10	116763769	116768182	Zm00001d025392		description=ubiquitin interaction motif-containing protein
10	116802508	116806924	Zm00001d025395		description=ubiquitin interaction motif-containing protein
10	116910281	116918062	Zm00001d025397		description=ubiquitin interaction motif-containing protein
10	117015014	117016890	Zm00001d025400		description=monooxygenase 1
10	117126777	117127673	Zm00001d025401	Name=abscisic acid stress ripening5	description= abscisic acid stress ripening5
10	117933309	117935123	Zm00001d025414
10	118619416	118620958	Zm00001d025435		description=PsbP domain-containing protein 2 chloroplastic
10	118846883	118849706	Zm00001d025445		description=Thioesterase superfamily protein
10	118888454	118897515	Zm00001d025449		description=Putative MAPKKK family protein kinase
10	119894515	119896773	Zm00001d025472		description=Two-component response regulator ARR16
10	120222171	120229249	Zm00001d025484		description=RNI-like superfamily protein
10	120607074	120608219	Zm00001d025503		description=ATP sulfurylase 1 chloroplastic
10	120876061	120876869	Zm00001d025509		description=RmlC-like cupins superfamily protein
10	121027429	121032089	Zm00001d025517		description=Small nuclear ribonucleoprotein LSM1
10	121061028	121062528	Zm00001d025519		description=Protein LURP-one-related 6
10	121082402	121084106	Zm00001d025520		description=Pentatricopeptide repeat-containing protein
10	121268606	121272616	Zm00001d025524	Name=lipoxygenase7	description= lipoxygenase7
10	121359009	121363755	Zm00001d025526	Name=serine carboxypeptidase1	description= serine carboxypeptidase1
10	121509129	121526342	Zm00001d025528		description=NAD(P)-linked oxidoreductase superfamily protein
10	121727843	121731496	Zm00001d025539		description=saposin B domain-containing protein
10	122019302	122026030	Zm00001d025551		description=Polyadenylate-binding protein RBP47B
10	122515167	122515565	Zm00001d025567
10	122641857	122645133	Zm00001d025572		description=Sugar transport protein 5
10	122855595	122861043	Zm00001d025580	Name=somatic embryogenesis receptor-like kinase1	description= somatic embryogenesis receptor-like kinase1
10	122918234	122920021	Zm00001d025581		description=loricrin-related
10	123295278	123297912	Zm00001d025586		description=Galactose mutarotase-like superfamily protein
10	123321362	123328119	Zm00001d025590		description=ABC transporter B family member 19
10	123896700	123897435	Zm00001d025612
10	123911243	123912298	Zm00001d025614		description=Putative IQ calmodulin-binding and BAG domain containing family protein
10	124266698	124269223	Zm00001d025623		description=Vacuolar iron transporter 1
10	124760949	124764322	Zm00001d025640	Name=GNAT-transcription factor 41	description=Acyl-CoA N-acyltransferases (NAT) superfamily protein
[truncated: 134 more rows]

## Sheet: common_92 DEGs
Supplemental Dataset 4 Candidate genes underlying QTLs and QTNs related to KRN
Chromosome	Start_Position	End_Position	Gene_ID	Gene name	description
1	283401534	283408034	Zm00001d034076		description=Cyclic nucleotide-gated ion channel 2
1	296458782	296462896	Zm00001d034564		description=Probable galactinol--sucrose galactosyltransferase 2
1	298548893	298572907	Zm00001d034633		description=Transducin/WD40 repeat-like superfamily protein
1	298573878	298575017	Zm00001d034634		description=Heavy metal transport/detoxification superfamily protein
1	298580972	298582430	Zm00001d034635	Name=chalcone flavanone isomerase1	description= chalcone flavanone isomerase1
2	4230854	4234535	Zm00001d002005	Name=liguleless1	description=Protein LIGULELESS 1
2	6508338	6509353	Zm00001d002137	Name=precursor elicitor peptide1	description= precursor elicitor peptide1
2	6550006	6551872	Zm00001d002139		description=Transferase
2	6636877	6642835	Zm00001d002143	Name=bZIP-transcription factor 27	description=Transcription factor TGA4
2	19196343	19207627	Zm00001d002682		description=Alpha-L-fucosidase 1
2	19320228	19329846	Zm00001d002688		description=Mitogen-activated protein kinase kinase kinase YODA
2	19414196	19420375	Zm00001d002693		description=U-box domain-containing protein 33
3	157879476	157881240	Zm00001d042260		description=Chloroplastic quinone-oxidoreductase
3	157976446	157978862	Zm00001d042263	Name=bHLH-transcription factor 175	description=Inducer of CBF expression 2
3	158098798	158103660	Zm00001d042267	Name=ARF-transcription factor 10	description=Auxin response factor 10
3	167224209	167226786	Zm00001d042438		description=Proline transporter 2
3	172481064	172485130	Zm00001d042578	Name=barley mlo defense gene homolog5	description= barley mlo defense gene homolog5
3	172642954	172645804	Zm00001d042580	Name=NAC-transcription factor 95	description=NAC domain-containing protein 35
3	180214691	180217092	Zm00001d042800		description=Protein BUD31-like protein 1
3	194900609	194905330	Zm00001d043295		description=Myosin-binding protein 1
3	194966876	194977775	Zm00001d043296		description=zinc knuckle (CCHC-type) family protein
4	12383791	12387641	Zm00001d049008		description=Apyrase 1
4	12389410	12392838	Zm00001d049009		description=Calcium-transporting ATPase 2
4	17366184	17386441	Zm00001d049138		description=ATP-dependent protease La (LON) domain protein
4	25700883	25701458	Zm00001d049308
4	166604240	166605598	Zm00001d051681		description=Glycosyltransferase 6
4	173753463	173755348	Zm00001d051887		description=Calmodulin-binding receptor-like cytoplasmic kinase 2
4	173809755	173817043	Zm00001d051890		description=Deoxyhypusine hydroxylase
4	183184901	183186308	Zm00001d052201		description=Probable magnesium transporter NIPA8
4	183190874	183196421	Zm00001d052202		description=Oxysterol-binding protein-related protein 3B
4	188298857	188304297	Zm00001d052362
4	188309258	188309908	Zm00001d052365	Name=AP2-EREBP-transcription factor 155	description=Putative AP2/EREBP transcription factor superfamily protein
4	188392275	188393223	Zm00001d052371		description=Protein LURP-one-related 8
4	189981671	189987040	Zm00001d052435		description=Probable peptide/nitrate transporter
4	203191381	203193332	Zm00001d052878
4	203236781	203238037	Zm00001d052881
4	203237227	203240756	Zm00001d052882		description=Putative TCP-1/cpn60 chaperonin family protein
4	203852542	203856158	Zm00001d052893		description=Protein EMSY-LIKE 4
4	204185325	204195660	Zm00001d052902		description=Chaperone protein dnaJ 6
4	204477980	204479339	Zm00001d052910
4	214448821	214449765	Zm00001d053117		description=Expressed protein%3B protein
4	245105914	245109405	Zm00001d054012		description=Putative leucine-rich repeat receptor-like protein kinase family protein
5	5325997	5328420	Zm00001d013135		description=Ribose-5-phosphate isomerase
5	5332065	5334626	Zm00001d013136	Name=defective kernel36	description=Pentatricopeptide repeat-containing protein
5	12718250	12718810	Zm00001d013494	Name=oleosin3	description=Oleosin Zm-II
5	16103881	16104775	Zm00001d013643
5	16124142	16125803	Zm00001d013646		description=Ankyrin repeat family protein
5	16205069	16210643	Zm00001d013651		description=Chlorophyll(ide) b reductase NOL chloroplastic
5	16248550	16257893	Zm00001d013652		description=Cationic amino acid transporter 4 vacuolar
5	23136709	23154188	Zm00001d013860		description=SH3 domain-containing protein 2
5	131162542	131163113	Zm00001d015917		description=Nucleic acid-binding OB-fold-like protein
5	172180319	172183764	Zm00001d016674	Name=HSF-transcription factor 6	description=Heat shock factor protein 2
5	175226979	175228235	Zm00001d016764		description=Ubiquitin-protein ligase
5	175250082	175253741	Zm00001d016765		description=Protein kinase superfamily protein
5	181491931	181500031	Zm00001d016963		description=Bifunctional riboflavin biosynthesis protein RIBA 1 chloroplastic
5	181546860	181560813	Zm00001d016969		description=E3 ubiquitin-protein ligase RHF1A
5	204090824	204092041	Zm00001d017678		description=Putative RING-H2 finger protein ATL53
5	204120837	204122561	Zm00001d017682	Name=PLATZ-transcription factor 11	description=PLATZ transcription factor family protein
5	204191566	204196931	Zm00001d017685		description=Chaperone DnaJ-domain superfamily protein
5	214720422	214721681	Zm00001d018122		description=E3 ubiquitin-protein ligase ATL6
5	214753216	214754871	Zm00001d018125		description=ATP binding protein
5	214791877	214793710	Zm00001d018127		description=SNW/SKI-interacting protein
6	154787169	154790440	Zm00001d038334		description=Protein NRT1/ PTR FAMILY 5.10
6	160888107	160889679	Zm00001d038605		description=Anthocyanidin 3-O-glucosyltransferase
6	161809629	161813487	Zm00001d038651		description=Jacalin-related lectin 3
6	167867757	167868857	Zm00001d038965		description=Purine permease
6	168207284	168208191	Zm00001d038984	Name=photosystem I H subunit1	description= photosystem I H subunit1
6	168300047	168303054	Zm00001d038989		description=Rop guanine nucleotide exchange factor 9
6	168304564	168305262	Zm00001d038990		description=Tumor protein-like protein%253B Tumor-related protein-like
6	168305998	168308728	Zm00001d038991		description=Protein MALE DISCOVERER 2
7	145134997	145143590	Zm00001d021180		description=BAG-associated GRAM protein 1
7	145200471	145202078	Zm00001d021185
7	150322957	150329229	Zm00001d021378		description=ARM repeat superfamily protein
8	111702614	111708099	Zm00001d010373		description=Stem glycoprotein
8	122041622	122047006	Zm00001d010618		description=Putative ubiquitin-conjugating enzyme family
8	122090727	122091387	Zm00001d010621
9	92565565	92566347	Zm00001d046499		description=DNA binding%3BDNA-directed RNA polymerases
10	106318787	106321238	Zm00001d025141	Name=bHLH-transcription factor 108	description=basic helix-loop-helix (bHLH) DNA-binding superfamily protein
10	114461652	114462911	Zm00001d025333		description=Arogenate dehydratase/prephenate dehydratase 6 chloroplastic
10	122515167	122515565	Zm00001d025567
10	122641857	122645133	Zm00001d025572		description=Sugar transport protein 5
10	133768161	133770170	Zm00001d025920		description=Putative lectin-like receptor protein kinase family protein
10	134081639	134098842	Zm00001d025932		description=Remorin
10	134109816	134112217	Zm00001d025933		description=downstream target of AGL15 2
10	135487493	135492026	Zm00001d025989	Name=Aux/IAA-transcription factor 43
10	138884177	138886680	Zm00001d026120		description=Putative HLH DNA-binding domain superfamily protein
10	138895014	138896501	Zm00001d026121		description=Amino acid transport protein
10	139980859	139983545	Zm00001d026156		description=Putative glycerol-3-phosphate transporter 1
10	140066627	140067028	Zm00001d026160	Name=gibberellin responsive2	description=Cortical cell-delineating protein%253B ZmGR1b protein
10	143503776	143504957	Zm00001d026318		description=OSJNBa0058K23.8 protein%3B protein
10	143570399	143571745	Zm00001d026321		description=F-box/kelch-repeat protein
10	143622658	143623730	Zm00001d026329		description=OSJNBa0058K23.15 protein%3B protein
