# Supplementary material for: Comparative transcriptome analysis identified candidate genes associated with kernel row number in maize
Source: PeerJ. 2025 Mar 31;13:e19143. doi: 10.7717/peerj.19143 (PMC11967441; doi:10.7717/peerj.19143)
Supplement: Supplemental Information 10 [file peerj-13-19143-s010.xlsx]

## Sheet: Data of qRT-PCR
Supplemental Dataset 6. Data of qRT-PCR
Gene	Stage	PHG35_qRT-PCR		Dan598_qRT-PCR
		mean	SD	mean	SD
Zm00001d031451	V6	1	0.156938	0.49735	0.210279
	V7	0.880157	0.135864	0.398044	0.124937
	V8	1.3404	0.143847	0.499769	0.0362426
	V9	1.881	0.261608	0.618566	0.158401
	V10	0.962372	0.186509	0.504759	0.0347009
Zm00001d020430	V6	1	0.318484	0.26677	0.087465
	V7	1.94891	0.33832	0.293006	0.0913619
	V8	9.2642	1.53098	0.331635	0.116228
	V9	0.00929928	0.00142622	0.113152	0.17282
	V10	0.270994	0.151464	0.549808	0.0460706
Zm00001d031068	V6	1	0.292292	0.227972	0.033367
	V7	0.291808	0.028568	0.191145	0.0196221
	V8	0.449712	0.0176623	0.227562	0.0346798
	V9	0.218303	0.0920479	0.307067	0.0401452
	V10	0.516363	0.0856817	0.472057	0.0543541
Zm00001d013895	V6	1	0.0816799	1.10624	0.177088
	V7	0.756284	0.0651894	0.995619	0.253289
	V8	0.157781	0.0177316	0.472701	0.0386439
	V9	0.268284	0.0479089	0.217688	0.040351
	V10	0.377313	0.0543927	0.334482	0.0538872
Zm00001d034633	V6	1	0.0578731	0.747377	0.118736
	V7	0.699103	0.0574878	0.552959	0.0361863
	V8	1.09233	0.0879822	0.521682	0.054479
	V9	0.622254	0.067792	0.492402	0.0425735
	V10	0.491493	0.0557564	0.354595	0.0262085
Zm00001d017391	V6	1	0.0549806	5.8726	0.56124
	V7	2.3083	0.209606	2.38557	0.10272
	V8	4.07839	0.335367	3.14923	0.356354
	V9	0.928088	0.561352	0.0491954	0.0139511
	V10	0.387204	0.0458062	1.98252	0.0687623
Zm00001d052442	V6	1	0.190433	0.86075	0.0514871
	V7	0.501157	0.0574923	0.250347	0.0225192
	V8	0.401925	0.0983974	0.15202	0.0144517
	V9	0.0610302	0.0319019	0.00587172	0.00123829
	V10	0.525101	0.177343	0.132923	0.00609309
Zm00001d020941	V6	1	0.325394	0.365922	0.145486
	V7	0.718313	0.09269	0.419543	0.133402
	V8	0.857462	0.0770674	0.500964	0.115215
	V9	0.357567	0.0671852	0.112184	0.0241808
	V10	0.325073	0.0387949	0.194297	0.0149962

## Sheet: Zm00001d020430
Stage		CT	CT Mean	Δ CT	Δ Δ CT	Results				SD
PV6	Actin Ct	21.722					0.82245	0.67082	0.590087
		21.428					1.33145	1.08598	0.955283
		21.243	21.4643				1.56049	1.2728	1.11961
	Target Ct	31.193
		30.498
		30.269	30.6533	9.189	0	1				0.318484
PV7	Actin Ct	18.471					2.59009	2.1199	1.85318
		18.182					2.28786	1.87254	1.63694
		17.988	18.2137				2.13317	1.74593	1.52626
	Target Ct	26.287
		26.466
		26.567	26.44	8.22633	-0.962667	1.94891				0.33832
PV8	Actin Ct	19.675					8.10043	7.79744	9.50048
		19.62					10.5634	10.1683	12.3891
		19.905	19.7333				8.23061	7.92275	9.65315
	Target Ct	25.846
		25.463
		25.823	25.7107	5.97733	-3.21167	9.2642				1.53098
PV9	Actin Ct	19.511					0.0108587	0.00923931	0.00801546
		19.278
		19.073	19.2873
	Target Ct	35.225
		/
		/	35.225	15.9377	6.74867	0.00929928				0.00142622
PV10	Actin Ct	20.185					0.476649	0.534033	0.49107
		20.349					0.197373	0.221135	0.203345
		20.228	20.254				0.183264	0.205328	0.188809
	Target Ct	30.443
		31.715
		31.822	31.3267	11.0727	1.88367	0.270994				0.151464
DV6	Actin Ct	18.236					0.382359	0.373712	0.388773
		18.203					0.277008	0.270743	0.281655
		18.26	18.233				0.180366	0.176287	0.183392
	Target Ct	28.812
		29.277
		29.896	29.3283	11.0953	1.90633	0.26677				0.087465
DV7	Actin Ct	19.689					0.45125	0.278549	0.244516
		18.993					0.40416	0.249481	0.219
		18.805	19.1623				0.412366	0.254546	0.223446
	Target Ct	30.026
		30.185
		30.156	30.1223	10.96	1.771	0.293006				0.0913619
DV8	Actin Ct	19.814					0.270181	0.23849	0.276816
		19.634					0.514057	0.45376	0.526681
		19.849	19.7657				0.290377	0.256317	0.297508
	Target Ct	30.891
		29.963
		30.787	30.547	10.7813	1.59233	0.331635				0.116228
DV9	Actin Ct	22.477					0.117603	0.113518	0.112111
		22.426					0.0317301	0.0306281	0.0302483
		22.408	22.437				0.421908	0.407254	0.402205
	Target Ct	34.754
		36.644
		32.911	34.7697	12.3327	3.14367	0.113152				0.17282
DV10	Actin Ct	18.825					0.520872	0.561361	0.488693
		18.933					0.534774	0.576343	0.501736
		18.733	18.8303				0.590088	0.635957	0.553632
	Target Ct	28.955
		28.917
		28.775	28.8823	10.052	0.863	0.549808				0.0460706

## Sheet: Zm00001d031451
Stage		CT	CT Mean	Δ CT	Δ Δ CT	Results				SD
PV6	Actin Ct	21.722					1.13027	0.92189	0.81094
		21.428					1.19389	0.973778	0.856584
		21.243	21.4643				1.26634	1.03288	0.908568
	Target Ct	23.845
		23.766
		23.681	23.764	2.29967	0	1				0.156938
PV7	Actin Ct	18.471
		18.182					1.04223	0.853028	0.7457
		17.988	18.2137				1.06191	0.869143	0.759787
	Target Ct	/
		20.711
		20.684	20.6975	2.48383	0.184167	0.880157				0.135864
PV8	Actin Ct	19.675					1.27869	1.23086	1.49969
		19.62					1.21644	1.17094	1.42669
		19.905	19.7333				1.37142	1.32012	1.60845
	Target Ct	21.62
		21.692
		21.519	21.6103	1.877	-0.422667	1.3404				0.143847
PV9	Actin Ct	19.511
		19.278					2.15198	1.83104	1.5885
		19.073	19.2873				2.24181	1.90748	1.65481
	Target Ct	/
		20.705
		20.646	20.6755	1.38817	-0.9115	1.881				0.261608
PV10	Actin Ct	20.185					1.15642	1.29564	1.19141
		20.349					0.841868	0.943221	0.867339
		20.228	20.254				0.79315	0.888638	0.817147
	Target Ct	22.275
		22.733
		22.819	22.609	2.355	0.0553328	0.962372				0.186509
DV6	Actin Ct	18.236					0.811502	0.79315	0.825115
		18.203					0.389762	0.380948	0.3963
		18.26	18.233				0.391387	0.382536	0.397952
	Target Ct	20.837
		21.895
		21.889	21.5403	3.30733	1.00767	0.49735				0.210279
DV7	Actin Ct	19.689					0.571833	0.352982	0.309855
		18.993					0.535392	0.330487	0.290109
		18.805	19.1623				0.615857	0.380157	0.33371
	Target Ct	22.795
		22.89
		22.688	22.791	3.62867	1.329	0.398044				0.124937
DV8	Actin Ct	19.814					0.534279	0.471611	0.5474
		19.634					0.510035	0.45021	0.52256
		19.849	19.7657				0.506511	0.4471	0.51895
	Target Ct	23.018
		23.085
		23.095	23.066	3.30033	1.00067	0.499769				0.0362426
DV9	Actin Ct	22.477					0.867338	0.837213	0.826833
		22.426					0.565526	0.545884	0.539116
		22.408	22.437				0.524373	0.506161	0.499885
	Target Ct	24.982
		25.599
		25.708	25.4297	2.99267	0.693	0.618566				0.158401
DV10	Actin Ct	18.825					0.490957	0.52912	0.460626
		18.933					0.525101	0.565919	0.49266
		18.733	18.8303				0.493345	0.531694	0.462866
	Target Ct	22.151
		22.054
		22.144	22.1163	3.286	0.986333	0.504759				0.0347009

## Sheet: Zm00001d020941
Stage		CT	CT Mean	Δ CT	Δ Δ CT	Results				SD
PV6	Actin Ct	20.8329					0.668964	0.794858	0.829893
		21.0817					0.802919	0.954023	0.996073
		21.1439	21.0195				1.26305	1.50074	1.56689
	Target Ct	23.1873
		22.924
		22.2704	22.7939	1.77436	0	1				0.325394
PV7	Actin Ct	18.9546					0.727924	0.647621	0.64682
		18.7859					0.716637	0.637579	0.63679
		18.7841	18.8415				0.898719	0.799574	0.798585
	Target Ct	21.1871
		21.2096
		20.883	21.0932	2.25167	0.477315	0.718313				0.09269
PV8	Actin Ct	19.4888					0.845806	0.78618	0.837582
		19.3833					0.825454	0.767262	0.817428
		19.4747	19.4489				0.981009	0.911852	0.971471
	Target Ct	21.5047
		21.5399
		21.2908	21.4451	1.99621	0.221856	0.857462				0.0770674
PV9	Actin Ct	19.2151
		/					0.35364		0.284903
		18.9033	19.0592				0.448763		0.361537
	Target Ct	/
		22.4891
		22.1454	22.3172	3.25807	1.48372	0.357567				0.0671852
DV6	Actin Ct	17.9958					0.258757	0.287988	0.265573
		18.1502					0.300049	0.333944	0.307953
		18.0333	18.0597				0.552468	0.614877	0.56702
	Target Ct	21.7204
		21.5068
		20.6262	21.2845	3.22475	1.45039	0.365922				0.145486
DV7	Actin Ct	18.8831					0.409216	0.358809	0.339315
		18.6935					0.369966	0.324394	0.30677
		18.6129	18.7298				0.670895	0.588254	0.556295
	Target Ct	21.9465
		22.092
		21.2333	21.7573	3.02747	1.25311	0.419543				0.133402
DV8	Actin Ct	19.7042					0.639434	0.509731	0.478098
		19.3771					0.466933	0.37222	0.349121
		19.2847	19.4553				0.706483	0.56318	0.52823
	Target Ct	22.1237
		22.5773
		21.9798	22.2269	2.77158	0.997222	0.500964				0.115215
DV9	Actin Ct	22.0528					0.143674	0.128955	0.134716
		21.8969					0.0982684	0.0882013	0.0921417
		21.9599	21.9699
	Target Ct	26.6263
		27.1743
		/	26.9003	4.93042	3.15606	0.112184				0.0241808
DV10	Actin Ct	18.3751					0.19442		0.199652
		/					0.207217		0.212795
		18.4134	18.3943				0.174958		0.179667
	Target Ct	22.5122
		22.4202
		22.6644	22.5323	4.13802	2.36366	0.194297				0.0149962
PV10	Actin Ct	20.0068					0.344394	0.313533	0.334884
		19.8714					0.382003	0.347771	0.371454
		19.9664	19.9482				0.294955	0.268524	0.28681
	Target Ct	23.319
		23.1695
		23.5426	23.3437	3.39552	1.62116	0.325073				0.0387949

## Sheet: Zm00001d031068
Stage		CT	CT Mean	Δ CT	Δ Δ CT	Results				SD
PV6	Actin Ct	20.8329					0.687498	0.816881	0.852886
		21.0817					1.12303	1.33438	1.39319
		21.1439	21.0195
	Target Ct	23.7499
		23.0419
		/	23.3959	2.37636	0	1				0.292292
PV7	Actin Ct	18.9546					0.338079	0.300783	0.300411
		18.7859					0.294592	0.262094	0.261769
		18.7841	18.8415
	Target Ct	22.8955
		23.0941
		/	22.9948	4.15327	1.77691	0.291808				0.028568
PV8	Actin Ct	19.4888
		19.3833					0.462308	0.429717	0.457813
		19.4747	19.4489
	Target Ct	/
		22.9782
		/	22.9782	3.52929	1.15293	0.449712				0.0176623
PV9	Actin Ct	19.2151					0.165718		0.133508
		/					0.230365		0.185589
		18.9033	19.0592				0.376868		0.303617
	Target Ct	24.1846
		23.7094
		22.9993	23.6311	4.57196	2.1956	0.218303				0.0920479
DV6	Actin Ct	17.9958					0.190002	0.211465	0.195007
		18.1502					0.211744	0.235663	0.217321
		18.0333	18.0597				0.257813	0.286937	0.264604
	Target Ct	22.768
		22.6117
		22.3277	22.5692	4.50943	2.13307	0.227972				0.033367
DV7	Actin Ct	18.8831					0.229073	0.200856	0.189943
		18.6935					0.204352	0.17918	0.169445
		18.6129	18.7298				0.2052	0.179924	0.170149
	Target Ct	23.3856
		23.5504
		23.5444	23.4934	4.76362	2.38726	0.191145				0.0196221
DV8	Actin Ct	19.7042					0.270467	0.215605	0.202225
		19.3771					0.251137	0.200196	0.187772
		19.2847	19.4553				0.291077	0.232035	0.217636
	Target Ct	23.967
		24.074
		23.8611	23.9674	4.51203	2.13567	0.227562				0.0346798
DV9	Actin Ct	22.0528					0.360837	0.323871	0.338339
		21.8969					0.275477	0.247256	0.258302
		21.9599	21.9699				0.346098	0.310642	0.32452
	Target Ct	25.8998
		26.2892
		25.9599	26.0496	4.07974	1.70338	0.307067				0.0401452
DV10	Actin Ct	18.3751					0.410798		0.421855
		/					0.52957		0.543824
		18.4134	18.3943				0.464653		0.477159
	Target Ct	22.035
		21.6686
		21.8572	21.8536	3.45933	1.08297	0.472057				0.0543541
PV10	Actin Ct	20.0068					0.608767	0.554216	0.591956
		19.8714					0.594565	0.541286	0.578147
		19.9664	19.9482				0.429683	0.391179	0.417817
	Target Ct	23.0992
		23.1333
		23.6018	23.2781	3.32991	0.953543	0.516363				0.0856817

## Sheet: Zm00001d052442
Stage		CT	CT Mean	Δ CT	Δ Δ CT	Results				SD
PV6	Actin Ct	21.412					0.775036	0.795169	0.744495
		21.449					1.10063	1.12922	1.05726
		21.354	21.405				1.18948	1.22038	1.14261
	Target Ct	20.63
		20.124
		20.012	20.2553	-1.14967	0	1				0.190433
PV7	Actin Ct	18.317					0.442986	0.56266	0.546894
		18.662					0.412176	0.523526	0.508858
		18.621	18.5333				0.439621	0.558385	0.54274
	Target Ct	18.342
		18.446
		18.353	18.3803	-0.153001	0.996667	0.501157				0.0574923
PV8	Actin Ct	19.352					0.330182	0.361066	0.343488
		19.481					0.517752	0.56618	0.538617
		19.409	19.414				0.333864	0.365093	0.347319
	Target Ct	19.801
		19.152
		19.785	19.5793	0.165333	1.315	0.401925				0.0983974
PV9	Actin Ct	17.893					0.025761	0.082317	0.082146
		19.569					0.0319804	0.102191	0.101978
		19.566	19.0093				0.0270793	0.0865293	0.0863495
	Target Ct	22.022
		21.71
		21.95	21.894	2.88467	4.03433	0.0610302				0.0319019
PV10	Actin Ct	19.849					0.32722	0.675174	0.702384
		20.894					0.315199	0.65037	0.67658
		20.951	20.5647				0.316951	0.653986	0.680342
	Target Ct	20.311
		20.365
		20.357	20.3443	-0.220333	0.929334	0.525101				0.177343
DV6	Actin Ct	19.057					0.890898	0.961483	0.881073
		19.167					0.820931	0.885972	0.811878
		19.041	19.0883				0.816957	0.881683	0.807947
	Target Ct	18.074
		18.192
		18.199	18.155	-0.933333	0.216334	0.86075				0.0514871
DV7	Actin Ct	19.115					0.246273	0.225834	0.251972
		18.99					0.28172	0.258338	0.288238
		19.148	19.0843				0.241038	0.221033	0.246615
	Target Ct	19.987
		19.793
		20.018	19.9327	0.848333	1.998	0.250347				0.0225192
DV8	Actin Ct	20.49					0.130881	0.156402	0.154999
		20.747					0.140081	0.167395	0.165894
		20.734	20.657
	Target Ct	22.274
		22.176
		/	22.225	1.568	2.71767	0.15202				0.0144517
DV9	Actin Ct	23.136					0.00542686	0.00491816	0.00395347
		22.994					0.0076641	0.00694568	0.0055833
		22.679	22.9363				0.00737231	0.00668125	0.00537073
	Target Ct	29.512
		29.014
		29.07	29.1987	6.26233	7.412	0.00587172				0.00123829
DV10	Actin Ct	20.218					0.136534	0.144019	0.138632
		20.295					0.125202	0.132066	0.127126
		20.24	20.251				0.128277	0.135309	0.130248
	Target Ct	21.941
		22.066
		22.031	22.0127	1.76167	2.91133	0.132923				0.00609309

## Sheet: Zm00001d017391
Stage		CT	CT Mean	Δ CT	Δ Δ CT	Results				SD
PV6	Actin Ct	21.275					1.00417	0.922104	0.978063
		21.152					1.09353	1.00417	1.06511
		21.237	21.2213				1.01819	0.934976	0.991717
	Target Ct	24.92
		24.797
		24.9	24.8723	3.651	0	1				0.0549806
PV7	Actin Ct	19.47
		19.351					2.32624	2.14206	2.04486
		19.284	19.3683				2.63719	2.42839	2.31819
	Target Ct	/
		21.903
		21.722	21.8125	2.44417	-1.20683	2.3083				0.209606
PV8	Actin Ct	19.297					4.29602	3.89872	4.63317
		19.157					4.03621	3.66294	4.35297
		19.406	19.2867				3.99723	3.62756	4.31094
	Target Ct	20.845
		20.935
		20.949	20.9097	1.623	-2.028	4.07839				0.335367
PV9	Actin Ct	19.546					1.92786	1.79627	1.56699
		19.444					0.931095	0.867539	0.756808
		19.247	19.4123				0.588046	0.547906	0.477973
	Target Ct	22.25
		23.3
		23.963	23.171	3.75867	0.107666	0.928088				0.561352
PV10	Actin Ct	20.503
		20.451					0.364502	0.351598	0.334019
		20.377	20.4437				0.446583	0.430773	0.409235
	Target Ct	/
		25.61
		25.317	25.4635	5.01983	1.36883	0.387204				0.0458062
DV6	Actin Ct	18.895					6.67145	6.00432	5.36657
		18.743					6.49352	5.84418	5.22344
		18.581	18.7397				6.45761	5.81186	5.19456
	Target Ct	19.808
		19.847
		19.855	19.8367	1.097	-2.554	5.8726				0.56124
DV7	Actin Ct	19.326					2.4777	2.27364	2.30537
		19.202					2.50533	2.29899	2.33108
		19.222	19.25				2.56152	2.35055	2.38336
	Target Ct	21.668
		21.652
		21.62	21.6467	2.39667	-1.25433	2.38557				0.10272
DV8	Actin Ct	19.338					3.83706	3.37059	3.51129
		19.151					3.18656	2.79917	2.91602
		19.21	19.233				3.17774	2.79142	2.90795
	Target Ct	21.049
		21.317
		21.321	21.229	1.996	-1.655	3.14923				0.356354
DV9	Actin Ct	19.859					0.0651993	0.0714958	0.0701701
		19.992					0.0373176	0.0409215	0.0401627
		19.965	19.9387				0.0414639	0.0454682	0.0446252
	Target Ct	27.449
		28.254
		28.102	27.935	7.99633	4.34533	0.0491954				0.0139511
DV10	Actin Ct	19.399					2.09653	2.0548	2.06194
		19.37					1.95342	1.91454	1.92119
		19.375	19.3813				1.97383	1.93455	1.94127
	Target Ct	21.982
		22.084
		22.069	22.045	2.66367	-0.987334	1.98252				0.0687623

## Sheet: Zm00001d034633
Stage		CT	CT Mean	Δ CT	Δ Δ CT	Results				SD
PV6	Actin Ct	21.275					1.07568	0.987775	1.04772
		21.152					1.06229	0.975475	1.03467
		21.237	21.2213				0.97845	0.898488	0.953015
	Target Ct	23.526
		23.5441
		23.6627	23.5776	2.35624	0	1				0.0578731
PV7	Actin Ct	19.47					0.809017	0.744964	0.711159
		19.351					0.712145	0.655761	0.626004
		19.284	19.3683				0.732674	0.674665	0.64405
	Target Ct	22.132
		22.316
		22.275	22.241	2.87267	0.516424	0.699103				0.0574878
PV8	Actin Ct	19.297					1.12369	1.01977	1.21188
		19.157
		19.406	19.2867				1.07717	0.977551	1.1617
	Target Ct	21.485
		/
		21.546	21.5155	2.22883	-0.12741	1.09233				0.0879822
PV9	Actin Ct	19.546					0.670934	0.625136	0.545345
		19.444					0.736748	0.686458	0.59884
		19.247	19.4123				0.643603	0.599671	0.52313
	Target Ct	22.478
		22.343
		22.538	22.453	3.04067	0.684424	0.622254				0.067792
PV10	Actin Ct	20.503					0.568111	0.547999	0.520599
		20.451					0.531169	0.512365	0.486747
		20.377	20.4437				0.445113	0.429355	0.407888
	Target Ct	23.675
		23.772
		24.027	23.8247	3.381	1.02476	0.491493				0.0557564
DV6	Actin Ct	18.895					0.743417	0.669076	0.59801
		18.743					0.931897	0.838709	0.749625
		18.581	18.7397
	Target Ct	21.679
		21.353
		/	21.516	2.77633	0.420091	0.747377				0.118736
DV7	Actin Ct	19.326					0.608885	0.558737	0.566537
		19.202					0.597597	0.548378	0.556034
		19.222	19.25				0.544213	0.499392	0.506363
	Target Ct	22.398
		22.425
		22.56	22.461	3.211	0.854757	0.552959				0.0361863
DV8	Actin Ct	19.338					0.57764	0.507416	0.528598
		19.151					0.501125	0.440203	0.458579
		19.21	19.233				0.610153	0.535977	0.55835
	Target Ct	22.486
		22.691
		22.407	22.528	3.295	0.938758	0.521682				0.054479
DV9	Actin Ct	19.859					0.498008	0.546102	0.535977
		19.992					0.48238	0.528965	0.519157
		19.965	19.9387				0.421102	0.461769	0.453208
	Target Ct	23.221
		23.267
		23.463	23.317	3.37833	1.02209	0.492402				0.0425735
DV10	Actin Ct	19.399					0.394813	0.386957	0.3883
		19.37					0.340386	0.333612	0.33477
		19.375	19.3813				0.344182	0.337333	0.338503
	Target Ct	23.096
		23.31
		23.294	23.2333	3.852	1.49576	0.354595				0.0262085

## Sheet: Zm00001d013895
Stage		CT	CT Mean	Δ CT	Δ Δ CT	Results				SD
PV6	Actin Ct	21.256					0.906472	0.89834	0.883519
		21.243					1.08098	1.07128	1.0536
		21.219	21.2393				1.05653	1.04705	1.02978
	Target Ct	29.574
		29.32
		29.353	29.4157	8.17633	0	1				0.0816799
PV7	Actin Ct	/						0.708742	0.709726
		19.328						0.723634	0.724638
		19.33	19.329					0.841673	0.842841
	Target Ct	28.001
		27.971
		27.753	27.9083	8.57933	0.403001	0.756284				0.0651894
PV8	Actin Ct	19.19					0.131427	0.138152	0.141545
		19.262					0.157163	0.165205	0.169263
		19.297	19.2497				0.167977	0.176572	0.180909
	Target Ct	30.294
		30.036
		29.94	30.09	10.8403	2.664	0.157781				0.0177316
PV9	Actin Ct	/						0.238214	0.230579
		19.615						0.338055	0.32722
		19.568	19.5915					0.251797	0.243726
	Target Ct	29.861
		29.356
		29.781	29.666	10.0745	1.89817	0.268284				0.0479089
PV10	Actin Ct	/						0.454809	0.402297
		20.52						0.342537	0.302988
		20.343	20.4315					0.414469	0.366614
	Target Ct	29.833
		30.242
		29.967	30.014	9.5825	1.40617	0.377313				0.0543927
DV6	Actin Ct	18.747					0.944965	1.02479	0.991945
		18.864					1.09303	1.18537	1.14737
		18.817	18.8093				1.32256	1.43429	1.38831
	Target Ct	27.005
		26.795
		26.52	26.7733	7.964	-0.212333	1.15856				0.177088
DV7	Actin Ct	19.209					1.19609	1.46645	1.33361
		19.503					0.737816	0.904589	0.82264
		19.366	19.3593				0.818091	1.00301	0.912144
	Target Ct	27.127
		27.824
		27.675	27.542	8.18267	0.00633367	0.995619				0.253289
DV8	Actin Ct	19.186
		19.425					0.43598	0.514532	0.5022
		19.39	19.3337				0.417641	0.492888	0.481075
	Target Ct	/
		28.56
		28.622	28.591	9.25733	1.081	0.472701				0.0386439
DV9	Actin Ct	/						0.23138	0.268005
		20.12						0.161918	0.187548
		20.332	20.226					0.22088	0.255843
	Target Ct	30.408
		30.923
		30.475	30.602	10.376	2.19967	0.217688				0.040351
DV10	Actin Ct	19.562					0.366614	0.369676	0.410181
		19.574					0.346357	0.34925	0.387518
		19.724	19.62				0.261219	0.263401	0.292262
	Target Ct	29.186
		29.268
		29.675	29.3763	9.75633	1.58	0.334482				0.0538872
